# Supplementary material for: Diverse Macrophage Populations Contribute to the Inflammatory Microenvironment in Premalignant Lesions During Localized Invasion
Source: Front Oncol. 2020 Sep 24;10:569985. doi: 10.3389/fonc.2020.569985 (PMC7541939; doi:10.3389/fonc.2020.569985)
Supplement: Supplementary Table 3 — Significant Gene Ontology terms in from GSEA analysis of selected macrophage clusters. [file Table_3.XLSX]

## Sheet: C2 VS C0
GO UP in C2	ES	NOM p-val	FDR q-val
GO_RIBONUCLEOPROTEIN_COMPLEX	0.6282	0	0
GO_PROTEIN_LOCALIZATION_TO_ENDOPLASMIC_RETICULUM	0.623331	0	0
GO_RIBOSOME	0.621757	0	0
GO_VIRAL_GENE_EXPRESSION	0.629247	0	0
GO_STRUCTURAL_CONSTITUENT_OF_RIBOSOME	0.627665	0	0
GO_CYTOSOLIC_RIBOSOME	0.635838	0	0
GO_RIBOSOMAL_SUBUNIT	0.624775	0	0
GO_PEPTIDE_BIOSYNTHETIC_PROCESS	0.585556	0	0
GO_COTRANSLATIONAL_PROTEIN_TARGETING_TO_MEMBRANE	0.633163	0	0
GO_PROTEIN_TARGETING_TO_MEMBRANE	0.623331	0	0
GO_NUCLEAR_TRANSCRIBED_MRNA_CATABOLIC_PROCESS	0.616881	0	0
GO_TRANSLATIONAL_INITIATION	0.60905	0	0
GO_RNA_CATABOLIC_PROCESS	0.597538	0	0
GO_AMIDE_BIOSYNTHETIC_PROCESS	0.576025	0	0
GO_ESTABLISHMENT_OF_PROTEIN_LOCALIZATION_TO_ENDOPLASMIC_RETICULUM	0.623331	0	0
GO_NUCLEAR_TRANSCRIBED_MRNA_CATABOLIC_PROCESS_NONSENSE_MEDIATED_DECAY	0.616881	0	0
GO_PROTEIN_TARGETING	0.580302	0	0
GO_MRNA_METABOLIC_PROCESS	0.552457	0	0
GO_ESTABLISHMENT_OF_PROTEIN_LOCALIZATION_TO_MEMBRANE	0.585323	0	0
GO_STRUCTURAL_MOLECULE_ACTIVITY	0.548402	0	0
GO_PEPTIDE_METABOLIC_PROCESS	0.513776	0	0
GO_RNA_BINDING	0.461047	0	0
GO_ESTABLISHMENT_OF_PROTEIN_LOCALIZATION_TO_ORGANELLE	0.514678	0	0
GO_CYTOSOLIC_SMALL_RIBOSOMAL_SUBUNIT	0.637619	0	0
GO_PROTEIN_LOCALIZATION_TO_ORGANELLE	0.476002	0	0
GO_LARGE_RIBOSOMAL_SUBUNIT	0.595184	0	0
GO_RIBONUCLEOPROTEIN_COMPLEX_BIOGENESIS	0.556445	0	0
GO_CYTOSOLIC_LARGE_RIBOSOMAL_SUBUNIT	0.610365	0	0
GO_CELLULAR_AMIDE_METABOLIC_PROCESS	0.453575	0	0
GO_SMALL_RIBOSOMAL_SUBUNIT	0.637619	0	0
GO_PROTEIN_LOCALIZATION_TO_MEMBRANE	0.461436	0	0
GO_CELLULAR_NITROGEN_COMPOUND_CATABOLIC_PROCESS	0.466639	0	0
GO_CYTOPLASMIC_TRANSLATION	0.597444	0	0
GO_POLYSOME	0.639775	0	0
GO_ORGANONITROGEN_COMPOUND_BIOSYNTHETIC_PROCESS	0.401156	0	0
GO_ORGANIC_CYCLIC_COMPOUND_CATABOLIC_PROCESS	0.434128	0	0
GO_RIBOSOME_BIOGENESIS	0.536003	0	0
GO_RIBONUCLEOPROTEIN_COMPLEX_SUBUNIT_ORGANIZATION	0.59434	0	0
GO_NCRNA_METABOLIC_PROCESS	0.573308	0	0
GO_POLYSOMAL_RIBOSOME	0.64684	0	0
GO_RRNA_METABOLIC_PROCESS	0.572233	0	0
GO_NCRNA_PROCESSING	0.572233	0	4.13543e-05
GO_REGULATION_OF_LYMPHOCYTE_ACTIVATION	0.537679	0	4.2316e-05
GO_INTRACELLULAR_PROTEIN_TRANSPORT	0.384667	0	4.33235e-05
GO_INTERSPECIES_INTERACTION_BETWEEN_ORGANISMS	0.362626	0	0.000124303
GO_RNA_PROCESSING	0.470231	0	0.000127065
GO_LEUKOCYTE_CELL_CELL_ADHESION	0.536857	0	0.000197162
GO_CELL_CELL_ADHESION	0.461544	0	0.000253297
GO_RRNA_BINDING	0.613383	0	0.000258363
GO_RIBOSOME_ASSEMBLY	0.613798	0	0.000263636
GO_LYMPHOCYTE_ACTIVATION	0.451729	0	0.000269128
GO_REGULATION_OF_LEUKOCYTE_PROLIFERATION	0.526303	0	0.000471481
GO_LEUKOCYTE_PROLIFERATION	0.504937	0	0.000608748
GO_CELLULAR_MACROMOLECULE_CATABOLIC_PROCESS	0.34822	0	0.000733736
GO_POSITIVE_REGULATION_OF_LEUKOCYTE_CELL_CELL_ADHESION	0.571094	0	0.000932988
GO_POSITIVE_REGULATION_OF_LEUKOCYTE_PROLIFERATION	0.619198	0	0.000949951
GO_RIBOSOMAL_LARGE_SUBUNIT_BIOGENESIS	0.588889	0	0.00104981
GO_T_CELL_PROLIFERATION	0.574425	0	0.00117057
GO_CELLULAR_MACROMOLECULE_LOCALIZATION	0.321884	0	0.00118157
GO_POSITIVE_REGULATION_OF_ION_TRANSPORT	0.538379	0	0.00168907
GO_ORGANELLE_ASSEMBLY	0.451582	0	0.001904
GO_POSITIVE_REGULATION_OF_CELL_CELL_ADHESION	0.571094	0	0.00193024
GO_REGULATION_OF_CELL_CELL_ADHESION	0.490959	0	0.00232659
GO_REGULATION_OF_T_CELL_ACTIVATION	0.534647	0	0.00240505
GO_T_CELL_ACTIVATION	0.464971	0	0.00256176
GO_HOMEOSTASIS_OF_NUMBER_OF_CELLS	0.491191	0.00322581	0.00257304
GO_REGULATION_OF_CELL_ACTIVATION	0.407381	0	0.00564621
GO_POSITIVE_REGULATION_OF_CELL_ADHESION	0.48802	0	0.00751611
GO_INTRACELLULAR_TRANSPORT	0.293544	0	0.00948752
GO_POSITIVE_REGULATION_OF_CELL_ACTIVATION	0.440281	0	0.0107651
GO_MRNA_BINDING	0.505658	0.00284091	0.011195
GO_MYELOID_CELL_HOMEOSTASIS	0.480598	0	0.0112771
GO_CELL_SUBSTRATE_JUNCTION	0.332144	0.00909091	0.0158076
GO_MAINTENANCE_OF_LOCATION	0.419423	0	0.0166099
GO_NEGATIVE_REGULATION_OF_CELL_ACTIVATION	0.479638	0.00591716	0.0197737
GO_MACROMOLECULE_CATABOLIC_PROCESS	0.2797	0	0.0201947
GO_REGULATION_OF_CELL_ADHESION	0.374783	0	0.028494
GO_NUCLEOLUS	0.335764	0	0.032425
GO_NEGATIVE_REGULATION_OF_IMMUNE_SYSTEM_PROCESS	0.37938	0.0096463	0.0371059
GO_BIOLOGICAL_ADHESION	0.307729	0	0.0437722
GO_POSTTRANSCRIPTIONAL_REGULATION_OF_GENE_EXPRESSION	0.361967	0.00740741	0.0440218
GO_MYELOID_LEUKOCYTE_MIGRATION	0.376764	0.00326797	0.0450924
GO_DIVALENT_INORGANIC_CATION_HOMEOSTASIS	0.398986	0.00299401	0.0453203
GO_NEURON_TO_NEURON_SYNAPSE	0.407681	0.0162866	0.0480436
GO_GLIOGENESIS	0.459584	0.0190217	0.0484337
GO_REGULATION_OF_APOPTOTIC_SIGNALING_PATHWAY	0.369731	0.016129	0.052665
GO_REGULATION_OF_CYTOSOLIC_CALCIUM_ION_CONCENTRATION	0.45337	0.0238095	0.0543265
GO_CYTOSKELETAL_PROTEIN_BINDING	0.299358	0.021097	0.0572092
GO_CELL_ACTIVATION	0.254586	0	0.0578964
GO_REGULATION_OF_ION_TRANSPORT	0.337745	0.0198676	0.0651666
GO_LYMPHOCYTE_MEDIATED_IMMUNITY	0.406431	0.0250784	0.0701221
GO_ANCHORING_JUNCTION	0.281782	0.00947867	0.0712268
GO_SIDE_OF_MEMBRANE	0.328919	0.0194805	0.0727283
GO_RNA_SPLICING	0.433245	0.0289855	0.0902759
GO_RESPONSE_TO_CHEMOKINE	0.435079	0.0380435	0.0922529
GO_LEUKOCYTE_MIGRATION	0.302185	0.0204082	0.0923835
GO_METAL_ION_HOMEOSTASIS	0.32176	0.0245614	0.093121
GO_CELL_CHEMOTAXIS	0.319192	0.0296296	0.0944271
GO_REGULATION_OF_TRANSMEMBRANE_TRANSPORT	0.35584	0.0415225	0.0969894
GO_CYTOKINE_MEDIATED_SIGNALING_PATHWAY	0.276199	0.0132743	0.103109
GO_PROTEIN_DIMERIZATION_ACTIVITY	0.278249	0.0204918	0.106661
GO_FC_RECEPTOR_SIGNALING_PATHWAY	0.420202	0.0439276	0.111494
GO_HOMEOSTATIC_PROCESS	0.246247	0.00956938	0.120051
GO_SUPRAMOLECULAR_COMPLEX	0.32918	0.0420712	0.122654
GO_CELLULAR_ION_HOMEOSTASIS	0.304888	0.0387324	0.13089
GO_RESPONSE_TO_BACTERIUM	0.289087	0.0189394	0.131689
GO_ORGANELLE_INNER_MEMBRANE	0.379968	0.036036	0.133114
GO_POSITIVE_REGULATION_OF_CHEMOTAXIS	0.395277	0.0558659	0.134114
GO_CYTOKINE_RECEPTOR_BINDING	0.382661	0.0607735	0.137804
GO_LYMPHOCYTE_DIFFERENTIATION	0.371488	0.04	0.139495
GO_NEGATIVE_REGULATION_OF_SECRETION	0.405104	0.0572207	0.141884
GO_PROTEIN_HOMODIMERIZATION_ACTIVITY	0.290709	0.0314685	0.156591
GO_ADAPTIVE_IMMUNE_RESPONSE_BASED_ON_SOMATIC_RECOMBINATION_OF_IMMUNE_RECEPTORS_BUILT_FROM_IMMUNOGLOBULIN_SUPERFAMILY_DOMAINS	0.377814	0.0552326	0.158178
GO_GRANULOCYTE_MIGRATION	0.386611	0.0788043	0.160788
GO_LEUKOCYTE_CHEMOTAXIS	0.303839	0.0654545	0.173726
GO_CELL_JUNCTION	0.237977	0.0107527	0.175211
GO_REGULATION_OF_LEUKOCYTE_MIGRATION	0.314035	0.0488599	0.175978
GO_LEUKOCYTE_APOPTOTIC_PROCESS	0.396933	0.102857	0.176255
GO_REGULATION_OF_CELLULAR_AMIDE_METABOLIC_PROCESS	0.311961	0.0754098	0.176983
GO_REGULATION_OF_INFLAMMATORY_RESPONSE	0.323171	0.0852459	0.178161
GO_NEGATIVE_REGULATION_OF_INTRACELLULAR_SIGNAL_TRANSDUCTION	0.34647	0.0740741	0.182938
GO_INTRINSIC_APOPTOTIC_SIGNALING_PATHWAY	0.365177	0.0852459	0.183607
GO_CELLULAR_PROTEIN_CONTAINING_COMPLEX_ASSEMBLY	0.242391	0.028169	0.184109
GO_REGULATION_OF_LEUKOCYTE_CHEMOTAXIS	0.354671	0.0560472	0.184527
GO_REGULATION_OF_CHEMOTAXIS	0.321093	0.078125	0.184961
GO_APOPTOTIC_SIGNALING_PATHWAY	0.289218	0.0647249	0.188087
GO_POSITIVE_REGULATION_OF_LEUKOCYTE_MIGRATION	0.359574	0.0803571	0.191182
GO_NEGATIVE_REGULATION_OF_TRANSPORT	0.311146	0.044586	0.193049
GO_TAXIS	0.254167	0.0497925	0.193574
GO_HUMORAL_IMMUNE_RESPONSE	0.361827	0.0791789	0.202873
GO_POSITIVE_REGULATION_OF_LOCOMOTION	0.261133	0.0465116	0.20429
GO_ANTIGEN_RECEPTOR_MEDIATED_SIGNALING_PATHWAY	0.37338	0.11828	0.205461
GO_MONONUCLEAR_CELL_MIGRATION	0.373038	0.0988701	0.209275
GO_TUMOR_NECROSIS_FACTOR_SUPERFAMILY_CYTOKINE_PRODUCTION	0.328461	0.0875421	0.211288
GO_CATALYTIC_COMPLEX	0.284426	0.0777027	0.212364
GO_RESPONSE_TO_VIRUS	0.316683	0.108974	0.235869
GO_CHROMOSOME_ORGANIZATION	0.335296	0.106628	0.236354
GO_CELL_MOTILITY	0.214037	0.0575916	0.236537
GO_LOCOMOTION	0.204021	0.0359281	0.240763
GO_REGULATION_OF_HEMOPOIESIS	0.299012	0.119205	0.241869
GO_SYNAPTIC_SIGNALING	0.325472	0.123123	0.242175
GO_PHAGOCYTOSIS	0.300843	0.110769	0.242207
GO_CELLULAR_RESPONSE_TO_LIPID	0.287107	0.0899654	0.242842
GO_NEGATIVE_REGULATION_OF_TRANSFERASE_ACTIVITY	0.356591	0.101493	0.243444
GO_RESPONSE_TO_CYTOKINE	0.219724	0.0582011	0.243841
GO_IDENTICAL_PROTEIN_BINDING	0.221832	0.0721154	0.243846
GO_POSITIVE_REGULATION_OF_CELL_DIFFERENTIATION	0.249214	0.0942623	0.244242
GO_REGULATION_OF_LEUKOCYTE_DIFFERENTIATION	0.322111	0.123123	0.255695
GO_ACTIVATION_OF_PROTEIN_KINASE_ACTIVITY	0.359085	0.123563	0.256495
GO_EXTERNAL_SIDE_OF_PLASMA_MEMBRANE	0.315981	0.105263	0.261858
GO_REGULATION_OF_CALCIUM_ION_TRANSPORT	0.353607	0.129477	0.262437
GO_POLYMERIC_CYTOSKELETAL_FIBER	0.353744	0.123596	0.263071
GO_POSITIVE_REGULATION_OF_CELL_POPULATION_PROLIFERATION	0.23786	0.103586	0.269674
GO_CELL	0.230335	0.0892857	0.276516
GO_REGULATION_OF_DNA_BINDING_TRANSCRIPTION_FACTOR_ACTIVITY	0.330145	0.130435	0.276642
GO_MULTICELLULAR_ORGANISMAL_HOMEOSTASIS	0.314393	0.157051	0.277334
GO_POSITIVE_REGULATION_OF_NERVOUS_SYSTEM_DEVELOPMENT	0.293747	0.12963	0.288559
GO_REGULATION_OF_CELLULAR_COMPONENT_MOVEMENT	0.222251	0.119048	0.291588
GO_SUPRAMOLECULAR_POLYMER	0.30285	0.150307	0.292038
GO_ION_HOMEOSTASIS	0.246476	0.115942	0.295275
GO_ACTIN_BINDING	0.264442	0.123746	0.296614
GO_NEGATIVE_REGULATION_OF_RESPONSE_TO_STIMULUS	0.212894	0.0558376	0.296967
GO_CELLULAR_RESPONSE_TO_BIOTIC_STIMULUS	0.300289	0.143713	0.299793
GO_ADAPTIVE_IMMUNE_RESPONSE	0.288267	0.147766	0.301512
GO_POSITIVE_REGULATION_OF_CELL_DEVELOPMENT	0.275846	0.164516	0.302336
GO_POSITIVE_REGULATION_OF_IMMUNE_EFFECTOR_PROCESS	0.326684	0.174041	0.303297
GO_CHEMICAL_HOMEOSTASIS	0.235019	0.139344	0.303461
GO_REGULATION_OF_CATION_TRANSMEMBRANE_TRANSPORT	0.329145	0.163743	0.304234
GO_NEGATIVE_REGULATION_OF_CELLULAR_COMPONENT_ORGANIZATION	0.292802	0.152482	0.305045
GO_CELLULAR_HOMEOSTASIS	0.235637	0.109375	0.317199
GO_LYMPHOCYTE_MIGRATION	0.338666	0.152975	0.326054
GO_REGULATION_OF_LEUKOCYTE_MEDIATED_IMMUNITY	0.33672	0.16442	0.329354
GO_NEUROGENESIS	0.213788	0.160156	0.336574
GO_KINASE_BINDING	0.253729	0.157191	0.341745
GO_RESPONSE_TO_INTERLEUKIN_1	0.320961	0.19209	0.354732
GO_POSITIVE_REGULATION_OF_TRANSPORT	0.208797	0.128079	0.358129
GO_TRANSMEMBRANE_TRANSPORT	0.216184	0.16129	0.359889
GO_POSITIVE_REGULATION_OF_DEFENSE_RESPONSE	0.245075	0.163194	0.360854
GO_G_PROTEIN_COUPLED_RECEPTOR_SIGNALING_PATHWAY	0.262443	0.17029	0.362342
GO_REGULATION_OF_CELL_DEATH	0.190233	0.118644	0.367788
GO_CYTOKINE_PRODUCTION	0.209202	0.175	0.368265
GO_I_KAPPAB_KINASE_NF_KAPPAB_SIGNALING	0.30122	0.214493	0.369312
GO_REGULATION_OF_CELLULAR_RESPONSE_TO_STRESS	0.266852	0.190141	0.385711
GO_SECOND_MESSENGER_MEDIATED_SIGNALING	0.284089	0.227848	0.386715
GO_PROTEIN_KINASE_B_SIGNALING	0.326636	0.198225	0.388674
GO_REGULATION_OF_PEPTIDE_SECRETION	0.23173	0.223048	0.398533
GO_NEGATIVE_REGULATION_OF_PROTEIN_MODIFICATION_PROCESS	0.257366	0.213333	0.400346
GO_POSITIVE_REGULATION_OF_CYTOKINE_PRODUCTION	0.243294	0.239726	0.403568
GO_NEGATIVE_REGULATION_OF_CELL_POPULATION_PROLIFERATION	0.248826	0.210526	0.405119
GO_REGULATION_OF_TRANSFERASE_ACTIVITY	0.223284	0.182879	0.407176
GO_REGULATION_OF_VASCULATURE_DEVELOPMENT	0.278584	0.243077	0.408906
GO_INTERLEUKIN_1_PRODUCTION	0.314574	0.236311	0.412702
GO_POSITIVE_REGULATION_OF_CELLULAR_PROTEIN_LOCALIZATION	0.300642	0.241379	0.412806
GO_REGULATION_OF_PROTEIN_LOCALIZATION	0.203895	0.211454	0.413154
GO_REGULATION_OF_TRANSPORT	0.186299	0.212766	0.413186
GO_REGULATION_OF_ION_TRANSMEMBRANE_TRANSPORT	0.287177	0.235474	0.413711
GO_CATION_TRANSPORT	0.214546	0.227848	0.420262
GO_CYTOKINE_ACTIVITY	0.315603	0.238606	0.4252
GO_REGULATION_OF_CELLULAR_COMPONENT_BIOGENESIS	0.228721	0.225	0.440629
GO_CELLULAR_COMPONENT_MORPHOGENESIS	0.221821	0.237354	0.441254
GO_PERINUCLEAR_REGION_OF_CYTOPLASM	0.226937	0.268116	0.466356
GO_IMMUNE_RESPONSE_REGULATING_CELL_SURFACE_RECEPTOR_SIGNALING_PATHWAY	0.242186	0.255591	0.467277
GO_IMMUNE_SYSTEM_DEVELOPMENT	0.208361	0.315385	0.468679
GO_ION_TRANSPORT	0.190948	0.255924	0.470093
GO_CADHERIN_BINDING	0.233582	0.264026	0.470676
GO_REGULATION_OF_METAL_ION_TRANSPORT	0.259613	0.263314	0.470728
GO_CATION_TRANSMEMBRANE_TRANSPORT	0.218454	0.276224	0.471162
GO_POSTSYNAPSE	0.216685	0.265455	0.47156
GO_REGULATION_OF_CELL_CYCLE	0.214865	0.309609	0.476427
GO_LEUKOCYTE_MEDIATED_IMMUNITY	0.187347	0.295775	0.476666
GO_CELLULAR_RESPONSE_TO_PEPTIDE_HORMONE_STIMULUS	0.304193	0.327485	0.476879
GO_CELL_BODY	0.257631	0.300595	0.477542
GO_CELLULAR_RESPONSE_TO_ORGANIC_CYCLIC_COMPOUND	0.248157	0.291946	0.478179
GO_CYTOKINE_SECRETION	0.269871	0.318328	0.478467
GO_INTERLEUKIN_6_PRODUCTION	0.293493	0.288952	0.478536
GO_POSITIVE_REGULATION_OF_CELLULAR_BIOSYNTHETIC_PROCESS	0.183868	0.282609	0.480271
GO_REGULATION_OF_PROTEIN_SERINE_THREONINE_KINASE_ACTIVITY	0.258757	0.300613	0.482014
GO_CHEMOKINE_PRODUCTION	0.298966	0.307278	0.482191
GO_CELL_MORPHOGENESIS_INVOLVED_IN_DIFFERENTIATION	0.253067	0.301939	0.482363
GO_RESPONSE_TO_MOLECULE_OF_BACTERIAL_ORIGIN	0.239513	0.320946	0.482968
GO_POSITIVE_REGULATION_OF_MOLECULAR_FUNCTION	0.179501	0.293194	0.483926
GO_NEGATIVE_REGULATION_OF_CELL_DEATH	0.198817	0.307018	0.484145
GO_POSITIVE_REGULATION_OF_TRANSFERASE_ACTIVITY	0.234201	0.304054	0.484988
GO_HORMONE_TRANSPORT	0.283686	0.334262	0.485107
GO_NEURON_DEATH	0.263715	0.297872	0.48633
GO_LEUKOCYTE_DIFFERENTIATION	0.223364	0.332203	0.489477
GO_REGULATION_OF_ESTABLISHMENT_OF_PROTEIN_LOCALIZATION	0.201224	0.341564	0.502368
GO_POSITIVE_REGULATION_OF_PROTEIN_SERINE_THREONINE_KINASE_ACTIVITY	0.278042	0.314917	0.502465
GO_ION_TRANSMEMBRANE_TRANSPORT	0.2001	0.313725	0.503588
GO_CELL_ACTIVATION_INVOLVED_IN_IMMUNE_RESPONSE	0.179177	0.342593	0.50994
GO_REGULATION_OF_MAP_KINASE_ACTIVITY	0.263323	0.34294	0.523101
GO_SYNAPSE	0.177794	0.363636	0.52375
GO_MYELOID_LEUKOCYTE_MEDIATED_IMMUNITY	0.179399	0.334783	0.524422
GO_IMMUNE_EFFECTOR_PROCESS	0.163966	0.333333	0.524896
GO_MYELOID_LEUKOCYTE_ACTIVATION	0.172719	0.328358	0.525801
GO_CELL_ADHESION_MOLECULE_BINDING	0.201038	0.394636	0.526929
GO_CELL_MORPHOGENESIS_INVOLVED_IN_NEURON_DIFFERENTIATION	0.26585	0.330409	0.528987
GO_RESPONSE_TO_LIPID	0.194392	0.376	0.529298
GO_MYELOID_CELL_DIFFERENTIATION	0.23158	0.350932	0.530736
GO_CELL_CYCLE	0.18836	0.384977	0.532043
GO_REGULATION_OF_VESICLE_MEDIATED_TRANSPORT	0.215286	0.349265	0.532392
GO_NERVOUS_SYSTEM_PROCESS	0.255774	0.324324	0.533921
GO_NUCLEAR_TRANSPORT	0.279938	0.373913	0.541135
GO_REGULATION_OF_SYMBIOSIS_ENCOMPASSING_MUTUALISM_THROUGH_PARASITISM	0.273943	0.378981	0.545446
GO_POSITIVE_REGULATION_OF_IMMUNE_RESPONSE	0.1802	0.383929	0.547619
GO_PEPTIDYL_AMINO_ACID_MODIFICATION	0.207607	0.381526	0.548826
GO_DEFENSE_RESPONSE_TO_VIRUS	0.270504	0.375758	0.549405
GO_DEVELOPMENTAL_PROCESS_INVOLVED_IN_REPRODUCTION	0.239155	0.407285	0.55098
GO_CELLULAR_LIPID_METABOLIC_PROCESS	0.206164	0.383562	0.551113
GO_BEHAVIOR	0.26416	0.382353	0.551406
GO_ACTIN_CYTOSKELETON	0.219237	0.388316	0.551546
GO_RESPONSE_TO_INTERFERON_GAMMA	0.247811	0.396501	0.565883
GO_REGULATION_OF_PEPTIDYL_TYROSINE_PHOSPHORYLATION	0.271718	0.4	0.566517
GO_CELLULAR_RESPONSE_TO_EXTERNAL_STIMULUS	0.236018	0.430464	0.573494
GO_DENDRITIC_TREE	0.238826	0.405882	0.575486
GO_POSITIVE_REGULATION_OF_CELL_DEATH	0.191867	0.447761	0.590776
GO_CENTRAL_NERVOUS_SYSTEM_DEVELOPMENT	0.192124	0.445693	0.591804
GO_PROTEIN_POLYMERIZATION	0.223827	0.41896	0.594527
GO_CELL_CYCLE_PHASE_TRANSITION	0.246015	0.42	0.596006
GO_PEPTIDE_SECRETION	0.189617	0.431298	0.597858
GO_SUPRAMOLECULAR_FIBER_ORGANIZATION	0.200638	0.466899	0.600577
GO_HYDROLASE_ACTIVITY_ACTING_ON_ESTER_BONDS	0.218154	0.435737	0.601383
GO_POSITIVE_REGULATION_OF_KINASE_ACTIVITY	0.223426	0.472973	0.614184
GO_REGULATION_OF_KINASE_ACTIVITY	0.197032	0.427046	0.614864
GO_SIGNAL_RELEASE	0.258839	0.45584	0.616035
GO_DIVALENT_INORGANIC_CATION_TRANSPORT	0.227859	0.508721	0.618328
GO_NUCLEAR_BODY	0.264815	0.433962	0.62369
GO_NEGATIVE_REGULATION_OF_SIGNALING	0.168052	0.504673	0.635409
GO_MITOCHONDRION	0.169139	0.484163	0.650137
GO_REGULATION_OF_HORMONE_LEVELS	0.232454	0.491176	0.659887
GO_DEFENSE_RESPONSE_TO_BACTERIUM	0.25109	0.493151	0.663565
GO_REGULATION_OF_CELL_MORPHOGENESIS	0.228965	0.505435	0.664853
GO_REGULATION_OF_PROTEIN_POLYMERIZATION	0.226605	0.482759	0.666591
GO_REGULATION_OF_SMALL_MOLECULE_METABOLIC_PROCESS	0.236471	0.533333	0.667645
GO_SECRETORY_GRANULE_MEMBRANE	0.195769	0.517685	0.676693
GO_TRANSCRIPTION_FACTOR_BINDING	0.21581	0.49359	0.678209
GO_MITOCHONDRIAL_ENVELOPE	0.201139	0.540193	0.688382
GO_CELLULAR_RESPONSE_TO_OXYGEN_CONTAINING_COMPOUND	0.152116	0.57767	0.693782
GO_REGULATION_OF_MITOTIC_CELL_CYCLE	0.208245	0.566372	0.694296
GO_CELLULAR_RESPONSE_TO_DRUG	0.194185	0.563468	0.694368
GO_RESPONSE_TO_DRUG	0.166202	0.568966	0.695942
GO_NEURON_PROJECTION	0.173429	0.577778	0.69621
GO_DNA_METABOLIC_PROCESS	0.231561	0.547486	0.696826
GO_HEAD_DEVELOPMENT	0.194796	0.584665	0.701214
GO_ACTIN_FILAMENT_POLYMERIZATION	0.222689	0.563636	0.701453
GO_GLUTAMATERGIC_SYNAPSE	0.23159	0.525714	0.701612
GO_CELLULAR_RESPONSE_TO_ENDOGENOUS_STIMULUS	0.151098	0.589862	0.70892
GO_REGULATION_OF_PROTEIN_CONTAINING_COMPLEX_ASSEMBLY	0.19574	0.545455	0.708931
GO_RESPONSE_TO_PEPTIDE_HORMONE	0.214619	0.533537	0.708977
GO_REGULATION_OF_SUPRAMOLECULAR_FIBER_ORGANIZATION	0.193845	0.58804	0.710146
GO_TRANSFERASE_COMPLEX	0.229846	0.575071	0.710771
GO_ACTIN_FILAMENT_BASED_PROCESS	0.17498	0.573944	0.710917
GO_NEGATIVE_REGULATION_OF_MULTI_ORGANISM_PROCESS	0.226169	0.555874	0.719289
GO_RESPONSE_TO_TOXIC_SUBSTANCE	0.170197	0.654412	0.743197
GO_CYTOSKELETON_ORGANIZATION	0.160223	0.625	0.747694
GO_CELLULAR_RESPONSE_TO_PEPTIDE	0.191912	0.586885	0.752415
GO_GENERATION_OF_PRECURSOR_METABOLITES_AND_ENERGY	0.213223	0.637427	0.756025
GO_CELL_CORTEX	0.204401	0.631737	0.762806
GO_NEURON_APOPTOTIC_PROCESS	0.222182	0.631436	0.765759
GO_ACTIN_FILAMENT_ORGANIZATION	0.179642	0.623003	0.777397
GO_CELLULAR_RESPONSE_TO_DNA_DAMAGE_STIMULUS	0.201034	0.660318	0.783905
GO_REGULATION_OF_CELLULAR_PROTEIN_LOCALIZATION	0.187804	0.695906	0.795333
GO_REGULATION_OF_MYELOID_CELL_DIFFERENTIATION	0.217741	0.674359	0.800126
GO_ACTIN_POLYMERIZATION_OR_DEPOLYMERIZATION	0.189208	0.680982	0.805768
GO_REGULATION_OF_ACTIN_FILAMENT_ORGANIZATION	0.192648	0.688679	0.811499
GO_ESTABLISHMENT_OF_LOCALIZATION_IN_CELL	0.211503	0.655556	0.814107
GO_NEGATIVE_REGULATION_OF_PHOSPHORUS_METABOLIC_PROCESS	0.191644	0.689441	0.814671
GO_REGULATION_OF_ORGANELLE_ORGANIZATION	0.144672	0.74477	0.820075
GO_RESPONSE_TO_ANTIBIOTIC	0.174036	0.720859	0.827793
GO_CARBOHYDRATE_DERIVATIVE_BIOSYNTHETIC_PROCESS	0.194447	0.713855	0.830286
GO_NEGATIVE_REGULATION_OF_PHOSPHORYLATION	0.194492	0.712121	0.832612
GO_EMBRYONIC_MORPHOGENESIS	0.20513	0.66954	0.833709
GO_SOMATODENDRITIC_COMPARTMENT	0.171206	0.745399	0.836171
GO_REGULATION_OF_CELL_CYCLE_PROCESS	0.176575	0.740625	0.843566
GO_REGULATION_OF_BINDING	0.176105	0.726444	0.844013
GO_REGULATION_OF_CYSTEINE_TYPE_ENDOPEPTIDASE_ACTIVITY	0.206335	0.762162	0.849739
GO_CELL_CYCLE_PROCESS	0.151023	0.797153	0.850424
GO_RESPONSE_TO_PEPTIDE	0.159316	0.759582	0.852793
GO_POSITIVE_REGULATION_OF_PROTEIN_CONTAINING_COMPLEX_ASSEMBLY	0.186207	0.728358	0.852859
GO_NEGATIVE_REGULATION_OF_CATABOLIC_PROCESS	0.194652	0.75	0.852981
GO_PROTEIN_CONTAINING_COMPLEX_ASSEMBLY	0.118952	0.842105	0.853144
GO_POSITIVE_REGULATION_OF_ESTABLISHMENT_OF_PROTEIN_LOCALIZATION	0.166406	0.717687	0.853947
GO_POSITIVE_REGULATION_OF_PEPTIDE_SECRETION	0.176669	0.731013	0.854809
GO_PROTEIN_MODIFICATION_BY_SMALL_PROTEIN_CONJUGATION_OR_REMOVAL	0.164461	0.818482	0.859534
GO_CELLULAR_RESPONSE_TO_CHEMICAL_STRESS	0.183695	0.753049	0.859941
GO_REGULATION_OF_ACTIN_FILAMENT_BASED_PROCESS	0.156572	0.77972	0.8608
GO_MITOTIC_CELL_CYCLE	0.158289	0.814947	0.866817
GO_REGULATION_OF_CYTOSKELETON_ORGANIZATION	0.153359	0.83165	0.869095
GO_CELLULAR_RESPONSE_TO_NITROGEN_COMPOUND	0.137495	0.817164	0.869565
GO_RESPONSE_TO_OXIDATIVE_STRESS	0.154969	0.795181	0.871394
GO_ORGANOPHOSPHATE_METABOLIC_PROCESS	0.153278	0.80303	0.879611
GO_PROTEIN_MODIFICATION_BY_SMALL_PROTEIN_CONJUGATION	0.162921	0.84984	0.892451
GO_INORGANIC_ION_TRANSMEMBRANE_TRANSPORT	0.139907	0.883269	0.894482
GO_RESPONSE_TO_ABIOTIC_STIMULUS	0.124884	0.908714	0.910624
GO_CELLULAR_RESPONSE_TO_HORMONE_STIMULUS	0.141327	0.859477	0.927684
GO_NEGATIVE_REGULATION_OF_RESPONSE_TO_EXTERNAL_STIMULUS	0.15021	0.914373	0.940177
GO_POSITIVE_REGULATION_OF_ORGANELLE_ORGANIZATION	0.139172	0.922034	0.942461
GO_POSITIVE_REGULATION_OF_PROTEIN_CATABOLIC_PROCESS	0.167378	0.912806	0.944002
GO_REGULATION_OF_CELLULAR_PROTEIN_CATABOLIC_PROCESS	0.159569	0.89011	0.944785
GO_UBIQUITIN_LIKE_PROTEIN_LIGASE_BINDING	0.163265	0.911043	0.946276
GO_CARBOHYDRATE_DERIVATIVE_METABOLIC_PROCESS	0.119753	0.943396	0.946804
GO_CHROMOSOME	0.12107	0.914286	0.947466
GO_REGULATION_OF_CELLULAR_LOCALIZATION	0.123978	0.916084	0.949647
GO_PROTEIN_HETERODIMERIZATION_ACTIVITY	0.154562	0.899696	0.949836
GO_MICROTUBULE_CYTOSKELETON	0.143657	0.926254	0.957681
GO_REGULATION_OF_PROTEIN_BINDING	0.156358	0.959184	0.961437
GO_ACTIN_FILAMENT_BINDING	0.143117	0.928571	0.963061
GO_RESPONSE_TO_INORGANIC_SUBSTANCE	0.123762	0.95356	0.96898
GO_HYDROLASE_ACTIVITY_ACTING_ON_ACID_ANHYDRIDES	0.125874	0.957187	0.97522
GO_CELL_PROJECTION_MEMBRANE	0.130926	0.975309	0.9805
GO_VESICLE_ORGANIZATION	0.124304	0.986595	0.991159
GO_MODIFICATION_DEPENDENT_MACROMOLECULE_CATABOLIC_PROCESS	0.100136	0.994152	0.997729
GO UP in C0	ES	NOM p-val	FDR q-val
GO_ENDOCYTOSIS	-0.372029	0.0189445	0.4576
GO_ENZYME_LINKED_RECEPTOR_PROTEIN_SIGNALING_PATHWAY	-0.372346	0.0223684	0.480075
GO_EXTRACELLULAR_MATRIX	-0.419424	0.0264256	0.51215
GO_CIRCULATORY_SYSTEM_PROCESS	-0.480224	0.0214724	0.515642
GO_REGULATION_OF_EPITHELIAL_CELL_MIGRATION	-0.468757	0.0382848	0.521349
GO_SMALL_GTPASE_MEDIATED_SIGNAL_TRANSDUCTION	-0.443125	0.023088	0.530121
GO_REGULATION_OF_NEURON_DIFFERENTIATION	-0.450068	0.016692	0.532476
GO_PEPTIDASE_REGULATOR_ACTIVITY	-0.506299	0.0325077	0.538192
GO_DEVELOPMENTAL_GROWTH	-0.453744	0.0261628	0.549305
GO_TISSUE_MIGRATION	-0.423759	0.0478395	0.558123
GO_GLYCOSAMINOGLYCAN_BINDING	-0.503348	0.00431035	0.563512
GO_MOLECULAR_TRANSDUCER_ACTIVITY	-0.371267	0.0531469	0.572923
GO_SULFUR_COMPOUND_BINDING	-0.461162	0.0675883	0.579177
GO_RECEPTOR_MEDIATED_ENDOCYTOSIS	-0.4125	0.0463768	0.597682
GO_PLATELET_DEGRANULATION	-0.452145	0.0528	0.602591
GO_WOUND_HEALING	-0.375424	0.0650637	0.607537
GO_ENDOSOME	-0.368579	0.00643501	0.608362
GO_AMIDE_BINDING	-0.438332	0.0899225	0.60943
GO_POSITIVE_REGULATION_OF_PHOSPHORUS_METABOLIC_PROCESS	-0.327237	0.0524934	0.611753
GO_POST_TRANSLATIONAL_PROTEIN_MODIFICATION	-0.467376	0.059375	0.614278
GO_SKELETAL_SYSTEM_DEVELOPMENT	-0.438543	0.087963	0.62002
GO_RAS_PROTEIN_SIGNAL_TRANSDUCTION	-0.41271	0.0787966	0.621689
GO_LIPID_BINDING	-0.404238	0.00833333	0.625924
GO_COLLAGEN_CONTAINING_EXTRACELLULAR_MATRIX	-0.392955	0.0748201	0.627832
GO_ENDOTHELIAL_CELL_MIGRATION	-0.457167	0.065625	0.630063
GO_GROWTH	-0.379582	0.0436681	0.635926
GO_PHOSPHOLIPID_BINDING	-0.389829	0.0584795	0.639042
GO_REGULATION_OF_PEPTIDASE_ACTIVITY	-0.356575	0.0787623	0.639395
GO_NEGATIVE_REGULATION_OF_PEPTIDASE_ACTIVITY	-0.453016	0.0662651	0.639862
GO_REGULATION_OF_SYSTEM_PROCESS	-0.408581	0.0643777	0.640261
GO_MUSCLE_STRUCTURE_DEVELOPMENT	-0.480249	0.0496894	0.641587
GO_ENDOSOMAL_TRANSPORT	-0.453468	0.0796875	0.644444
GO_TUBE_DEVELOPMENT	-0.314175	0.0801577	0.664012
GO_INTRINSIC_COMPONENT_OF_PLASMA_MEMBRANE	-0.332102	0.0771313	0.668347
GO_POSITIVE_REGULATION_OF_MAPK_CASCADE	-0.315453	0.159317	0.681773
GO_POSITIVE_REGULATION_OF_MULTICELLULAR_ORGANISMAL_PROCESS	-0.252464	0.11138	0.685454
GO_INFLAMMATORY_RESPONSE	-0.275787	0.134347	0.687464
GO_GOLGI_VESICLE_TRANSPORT	-0.375153	0.18196	0.697631
GO_CARBOHYDRATE_BINDING	-0.425439	0.119309	0.698289
GO_AMEBOIDAL_TYPE_CELL_MIGRATION	-0.474854	0.00870827	0.702357
GO_CARDIOVASCULAR_SYSTEM_DEVELOPMENT	-0.319971	0.106742	0.70324
GO_POSITIVE_REGULATION_OF_PROTEIN_MODIFICATION_PROCESS	-0.300092	0.118644	0.703391
GO_AXON	-0.384393	0.128593	0.705223
GO_ENDOSOME_MEMBRANE	-0.414633	0.0107962	0.70532
GO_REGULATION_OF_GROWTH	-0.357086	0.117735	0.705481
GO_REGULATION_OF_PHOSPHORYLATION	-0.26742	0.140704	0.707242
GO_TRANSMEMBRANE_RECEPTOR_PROTEIN_TYROSINE_KINASE_SIGNALING_PATHWAY	-0.339844	0.0990371	0.711283
GO_MOLECULAR_FUNCTION_REGULATOR	-0.271114	0.0997475	0.71208
GO_REGULATION_OF_NEURON_PROJECTION_DEVELOPMENT	-0.400649	0.103715	0.713456
GO_PIGMENT_GRANULE	-0.392924	0.124814	0.715924
GO_ORGANONITROGEN_COMPOUND_CATABOLIC_PROCESS	-0.28645	0.0854592	0.71628
GO_ANIMAL_ORGAN_MORPHOGENESIS	-0.342827	0.126741	0.717062
GO_WHOLE_MEMBRANE	-0.257013	0.111772	0.717463
GO_BLOOD_MICROPARTICLE	-0.397985	0.173167	0.717545
GO_NEGATIVE_REGULATION_OF_RNA_BIOSYNTHETIC_PROCESS	-0.321093	0.117812	0.718771
GO_VESICLE_LUMEN	-0.318188	0.108219	0.719717
GO_NEGATIVE_REGULATION_OF_TRANSCRIPTION_BY_RNA_POLYMERASE_II	-0.360323	0.15885	0.719744
GO_CALCIUM_ION_BINDING	-0.347754	0.160391	0.726338
GO_RECEPTOR_REGULATOR_ACTIVITY	-0.341983	0.188427	0.72645
GO_BLOOD_VESSEL_MORPHOGENESIS	-0.319832	0.126722	0.726501
GO_NEURON_DIFFERENTIATION	-0.299334	0.13413	0.726787
GO_PLASMA_MEMBRANE_PROTEIN_COMPLEX	-0.393331	0.162075	0.727262
GO_SMALL_MOLECULE_METABOLIC_PROCESS	-0.27142	0.128834	0.727515
GO_COATED_VESICLE	-0.421012	0.124043	0.728956
GO_CLATHRIN_COATED_VESICLE	-0.421012	0.142195	0.72931
GO_REGULATION_OF_CELL_POPULATION_PROLIFERATION	-0.245865	0.1772	0.729756
GO_REGULATION_OF_BODY_FLUID_LEVELS	-0.357907	0.161198	0.730028
GO_GOLGI_APPARATUS	-0.299367	0.137309	0.735645
GO_DEFENSE_RESPONSE	-0.235642	0.154217	0.737936
GO_NEGATIVE_REGULATION_OF_HYDROLASE_ACTIVITY	-0.35715	0.16716	0.738867
GO_RESPONSE_TO_WOUNDING	-0.312679	0.124128	0.741535
GO_RECEPTOR_COMPLEX	-0.375802	0.231231	0.742851
GO_PEPTIDASE_ACTIVITY	-0.35925	0.208709	0.744551
GO_TUBE_MORPHOGENESIS	-0.280289	0.174731	0.744558
GO_NEGATIVE_REGULATION_OF_PROTEOLYSIS	-0.345558	0.207715	0.74604
GO_SENSORY_ORGAN_DEVELOPMENT	-0.379618	0.216463	0.746361
GO_REGULATION_OF_CELL_PROJECTION_ORGANIZATION	-0.318958	0.190131	0.746623
GO_ORGANIC_HYDROXY_COMPOUND_METABOLIC_PROCESS	-0.361216	0.218654	0.747261
GO_IMPORT_INTO_CELL	-0.382269	0.0119048	0.74823
GO_ENDOCYTIC_VESICLE	-0.313717	0.210818	0.750014
GO_SMALL_GTPASE_BINDING	-0.378191	0.200627	0.752178
GO_VACUOLAR_MEMBRANE	-0.316952	0.210835	0.75816
GO_REGULATION_OF_PHOSPHORUS_METABOLIC_PROCESS	-0.249915	0.198198	0.758653
GO_ENZYME_ACTIVATOR_ACTIVITY	-0.330123	0.225519	0.760267
GO_ANATOMICAL_STRUCTURE_FORMATION_INVOLVED_IN_MORPHOGENESIS	-0.272533	0.202114	0.760534
GO_PROTEIN_CATABOLIC_PROCESS	-0.272443	0.245232	0.766621
GO_POSITIVE_REGULATION_OF_MULTI_ORGANISM_PROCESS	-0.283841	0.27	0.771898
GO_SMALL_MOLECULE_CATABOLIC_PROCESS	-0.349992	0.262751	0.773398
GO_ENTRY_INTO_HOST	-0.363584	0.248841	0.778486
GO_REGULATION_OF_HYDROLASE_ACTIVITY	-0.251294	0.209391	0.781247
GO_CATION_TRANSMEMBRANE_TRANSPORTER_ACTIVITY	-0.356955	0.257576	0.781834
GO_POSITIVE_REGULATION_OF_SECRETION	-0.300274	0.271449	0.787901
GO_VIRAL_LIFE_CYCLE	-0.308018	0.274854	0.78866
GO_ENZYME_INHIBITOR_ACTIVITY	-0.319259	0.242978	0.790088
GO_ORGANIC_ACID_METABOLIC_PROCESS	-0.277133	0.219613	0.790309
GO_SIGNALING_RECEPTOR_BINDING	-0.241021	0.237562	0.793799
GO_REGULATION_OF_MULTI_ORGANISM_PROCESS	-0.247156	0.346829	0.796827
GO_PROTEIN_PHOSPHORYLATION	-0.225886	0.342965	0.799506
GO_REGULATION_OF_CELL_DIFFERENTIATION	-0.221366	0.330413	0.801187
GO_REGULATION_OF_PROTEIN_MODIFICATION_PROCESS	-0.220305	0.348952	0.80459
GO_POSITIVE_REGULATION_OF_IMMUNE_SYSTEM_PROCESS	-0.216666	0.355414	0.804731
GO_POSITIVE_REGULATION_OF_DEVELOPMENTAL_PROCESS	-0.22761	0.320802	0.804909
GO_ANTIGEN_PROCESSING_AND_PRESENTATION_OF_PEPTIDE_ANTIGEN	-0.325296	0.376766	0.805503
GO_POSITIVE_REGULATION_OF_CATALYTIC_ACTIVITY	-0.223691	0.345006	0.805526
GO_NEGATIVE_REGULATION_OF_BIOSYNTHETIC_PROCESS	-0.241396	0.348371	0.806847
GO_CELL_CELL_SIGNALING	-0.225324	0.373541	0.807098
GO_INNATE_IMMUNE_RESPONSE	-0.230665	0.338918	0.80817
GO_REGULATION_OF_MAPK_CASCADE	-0.255431	0.347527	0.808622
GO_REGULATION_OF_RESPONSE_TO_EXTERNAL_STIMULUS	-0.227785	0.326406	0.810052
GO_INTERACTION_WITH_HOST	-0.313078	0.40566	0.810309
GO_REGULATION_OF_ANATOMICAL_STRUCTURE_SIZE	-0.265143	0.347469	0.810692
GO_CIRCULATORY_SYSTEM_DEVELOPMENT	-0.246547	0.320988	0.811164
GO_NUCLEAR_ENVELOPE	-0.298972	0.392496	0.813211
GO_CELL_SURFACE_RECEPTOR_SIGNALING_PATHWAY_INVOLVED_IN_CELL_CELL_SIGNALING	-0.285861	0.384389	0.813918
GO_NEURON_DEVELOPMENT	-0.257206	0.319205	0.814859
GO_CELL_SURFACE	-0.243291	0.388298	0.816024
GO_CELLULAR_PROTEIN_CATABOLIC_PROCESS	-0.256036	0.374652	0.816142
GO_POSITIVE_REGULATION_OF_INTRACELLULAR_SIGNAL_TRANSDUCTION	-0.24127	0.316391	0.816179
GO_POSITIVE_REGULATION_OF_RESPONSE_TO_BIOTIC_STIMULUS	-0.264816	0.442671	0.816534
GO_GLAND_DEVELOPMENT	-0.291016	0.442279	0.818216
GO_REGULATION_OF_PROTEOLYSIS	-0.259344	0.265223	0.818713
GO_MEMBRANE_REGION	-0.310359	0.317221	0.819023
GO_REGULATION_OF_DEFENSE_RESPONSE	-0.226509	0.430093	0.819316
GO_PROTEOLYSIS	-0.215198	0.403042	0.820441
GO_GTPASE_BINDING	-0.321866	0.348018	0.821064
GO_ERK1_AND_ERK2_CASCADE	-0.267986	0.454015	0.821671
GO_PATTERN_RECOGNITION_RECEPTOR_SIGNALING_PATHWAY	-0.319933	0.417981	0.821855
GO_TISSUE_MORPHOGENESIS	-0.271505	0.441048	0.822539
GO_EARLY_ENDOSOME	-0.297726	0.394737	0.822912
GO_OXIDOREDUCTASE_ACTIVITY	-0.285094	0.33795	0.823286
GO_REGULATION_OF_INTRACELLULAR_SIGNAL_TRANSDUCTION	-0.207049	0.445963	0.823623
GO_REGULATION_OF_IMMUNE_SYSTEM_PROCESS	-0.203897	0.389222	0.824048
GO_SECRETION	-0.195036	0.392479	0.824545
GO_MUSCLE_SYSTEM_PROCESS	-0.332166	0.287051	0.825236
GO_PROTEIN_DOMAIN_SPECIFIC_BINDING	-0.290024	0.33678	0.826078
GO_ENDOCYTIC_VESICLE_MEMBRANE	-0.291596	0.441041	0.826161
GO_ANION_TRANSPORT	-0.329472	0.307932	0.826422
GO_POSITIVE_REGULATION_OF_CELL_PROJECTION_ORGANIZATION	-0.336597	0.332815	0.826479
GO_RESPONSE_TO_BIOTIC_STIMULUS	-0.196656	0.435714	0.827376
GO_MORPHOGENESIS_OF_AN_EPITHELIUM	-0.283474	0.429799	0.827904
GO_RESPONSE_TO_TUMOR_NECROSIS_FACTOR	-0.292629	0.459542	0.828051
GO_POSITIVE_REGULATION_OF_PROTEIN_METABOLIC_PROCESS	-0.207897	0.385572	0.828489
GO_TRANSITION_METAL_ION_BINDING	-0.274248	0.427143	0.828698
GO_COAGULATION	-0.302445	0.426471	0.829967
GO_CELL_CELL_SIGNALING_BY_WNT	-0.300053	0.332326	0.830121
GO_NEGATIVE_REGULATION_OF_NUCLEOBASE_CONTAINING_COMPOUND_METABOLIC_PROCESS	-0.265931	0.331967	0.830517
GO_EPITHELIAL_CELL_DIFFERENTIATION	-0.285748	0.397816	0.83057
GO_POSITIVE_REGULATION_OF_ERK1_AND_ERK2_CASCADE	-0.332381	0.28852	0.830985
GO_SIGNAL_TRANSDUCTION_BY_PROTEIN_PHOSPHORYLATION	-0.234128	0.442779	0.831097
GO_CELL_PROJECTION_ASSEMBLY	-0.285514	0.462963	0.831204
GO_DEFENSE_RESPONSE_TO_OTHER_ORGANISM	-0.19558	0.483597	0.831607
GO_POSITIVE_REGULATION_OF_SIGNALING	-0.22494	0.287484	0.832706
GO_NEGATIVE_REGULATION_OF_MOLECULAR_FUNCTION	-0.222315	0.438338	0.833227
GO_REGULATION_OF_NERVOUS_SYSTEM_DEVELOPMENT	-0.236881	0.472651	0.833366
GO_G_PROTEIN_COUPLED_RECEPTOR_BINDING	-0.302688	0.403454	0.833761
GO_PROCESS_UTILIZING_AUTOPHAGIC_MECHANISM	-0.288039	0.449695	0.834047
GO_AXON_DEVELOPMENT	-0.286935	0.447452	0.834277
GO_POSITIVE_REGULATION_OF_CELLULAR_COMPONENT_ORGANIZATION	-0.207285	0.477535	0.834794
GO_SMALL_MOLECULE_BIOSYNTHETIC_PROCESS	-0.286592	0.313343	0.837462
GO_REGULATION_OF_IMMUNE_EFFECTOR_PROCESS	-0.24221	0.476383	0.837739
GO_CELL_GROWTH	-0.333222	0.321481	0.838556
GO_METAL_ION_TRANSPORT	-0.226336	0.49101	0.84253
GO_LATE_ENDOSOME	-0.34121	0.297806	0.843367
GO_REGULATION_OF_ANATOMICAL_STRUCTURE_MORPHOGENESIS	-0.241445	0.292328	0.84341
GO_CELLULAR_RESPONSE_TO_EXTRACELLULAR_STIMULUS	-0.262162	0.550075	0.844804
GO_POSITIVE_REGULATION_OF_TRANSCRIPTION_BY_RNA_POLYMERASE_II	-0.239336	0.48378	0.845654
GO_POSITIVE_REGULATION_OF_GTPASE_ACTIVITY	-0.275544	0.53125	0.845952
GO_SECRETORY_GRANULE	-0.186573	0.562423	0.845963
GO_SEXUAL_REPRODUCTION	-0.301312	0.491779	0.847434
GO_DRUG_METABOLIC_PROCESS	-0.235495	0.538251	0.84824
GO_POSITIVE_REGULATION_OF_RESPONSE_TO_EXTERNAL_STIMULUS	-0.220907	0.507607	0.848493
GO_EXTRINSIC_APOPTOTIC_SIGNALING_PATHWAY	-0.276588	0.545727	0.849859
GO_REGULATION_OF_CELL_DEVELOPMENT	-0.223964	0.521558	0.850494
GO_SECRETORY_VESICLE	-0.187987	0.587361	0.850529
GO_ORGANIC_ACID_BIOSYNTHETIC_PROCESS	-0.289128	0.52381	0.850546
GO_ENZYME_REGULATOR_ACTIVITY	-0.249589	0.286486	0.850876
GO_ENDOPLASMIC_RETICULUM	-0.24483	0.28229	0.851363
GO_MYELOID_LEUKOCYTE_DIFFERENTIATION	-0.263024	0.509517	0.851739
GO_VACUOLAR_LUMEN	-0.248457	0.529582	0.852051
GO_ANTIGEN_PROCESSING_AND_PRESENTATION	-0.290872	0.501543	0.852737
GO_REGULATION_OF_IMMUNE_RESPONSE	-0.19323	0.52267	0.852911
GO_ACTIVATION_OF_IMMUNE_RESPONSE	-0.204435	0.584554	0.853224
GO_RESPONSE_TO_GROWTH_FACTOR	-0.244808	0.484765	0.853915
GO_PEPTIDYL_TYROSINE_MODIFICATION	-0.268448	0.527273	0.854538
GO_ACTIVATION_OF_INNATE_IMMUNE_RESPONSE	-0.3228	0.310241	0.855195
GO_NEGATIVE_REGULATION_OF_CATALYTIC_ACTIVITY	-0.218287	0.545206	0.855486
GO_RUFFLE	-0.267823	0.53149	0.855935
GO_GOLGI_MEMBRANE	-0.249147	0.507184	0.856173
GO_CELLULAR_COMPONENT_DISASSEMBLY	-0.234395	0.589158	0.856897
GO_OXIDATION_REDUCTION_PROCESS	-0.226529	0.5427	0.856947
GO_POSITIVE_REGULATION_OF_HYDROLASE_ACTIVITY	-0.220095	0.548781	0.857422
GO_NEGATIVE_REGULATION_OF_CELL_DIFFERENTIATION	-0.245298	0.522472	0.859817
GO_REGULATION_OF_INTRACELLULAR_TRANSPORT	-0.278021	0.593656	0.868237
GO_VACUOLE	-0.192738	0.608234	0.869843
GO_REGULATION_OF_WNT_SIGNALING_PATHWAY	-0.277982	0.576983	0.870029
GO_REGULATION_OF_GTPASE_ACTIVITY	-0.261077	0.564063	0.870475
GO_LYSOSOMAL_LUMEN	-0.262542	0.584475	0.874277
GO_RESPONSE_TO_EXTRACELLULAR_STIMULUS	-0.217505	0.60146	0.877746
GO_CELL_PROJECTION_ORGANIZATION	-0.19476	0.592593	0.878097
GO_REPRODUCTION	-0.218316	0.607397	0.879659
GO_MEMBRANE_ORGANIZATION	-0.191534	0.632979	0.883601
GO_REGULATION_OF_RESPONSE_TO_BIOTIC_STIMULUS	-0.208543	0.621127	0.88405
GO_NEGATIVE_REGULATION_OF_MULTICELLULAR_ORGANISMAL_PROCESS	-0.185103	0.623853	0.885526
GO_RESPONSE_TO_ACID_CHEMICAL	-0.265891	0.607903	0.885765
GO_MULTI_ORGANISM_REPRODUCTIVE_PROCESS	-0.233278	0.625714	0.88677
GO_PRESYNAPSE	-0.258876	0.601838	0.886975
GO_CELL_CELL_JUNCTION	-0.25106	0.622781	0.887326
GO_RESPONSE_TO_ENDOGENOUS_STIMULUS	-0.177456	0.645443	0.887548
GO_LIPID_METABOLIC_PROCESS	-0.192185	0.629973	0.887982
GO_DRUG_BINDING	-0.199847	0.683473	0.892507
GO_MONOCARBOXYLIC_ACID_METABOLIC_PROCESS	-0.239144	0.640364	0.893359
GO_REGULATION_OF_SECRETION	-0.191324	0.652589	0.894206
GO_RESPONSE_TO_HORMONE	-0.193307	0.674055	0.895093
GO_SYNAPSE_ORGANIZATION	-0.246913	0.633739	0.895217
GO_EMBRYO_DEVELOPMENT_ENDING_IN_BIRTH_OR_EGG_HATCHING	-0.254491	0.656646	0.895774
GO_NEGATIVE_REGULATION_OF_CYTOKINE_PRODUCTION	-0.243472	0.645646	0.899086
GO_HEART_DEVELOPMENT	-0.245834	0.6875	0.899219
GO_NEGATIVE_REGULATION_OF_DEVELOPMENTAL_PROCESS	-0.18996	0.694259	0.900232
GO_NEGATIVE_REGULATION_OF_PROTEIN_METABOLIC_PROCESS	-0.180147	0.677878	0.901919
GO_POSITIVE_REGULATION_OF_RNA_METABOLIC_PROCESS	-0.190891	0.698264	0.902649
GO_EPITHELIUM_DEVELOPMENT	-0.194774	0.708049	0.904651
GO_EXOCYTOSIS	-0.165581	0.723022	0.909854
GO_MULTICELLULAR_ORGANISM_REPRODUCTION	-0.233831	0.696183	0.911609
GO_RESPONSE_TO_OXYGEN_LEVELS	-0.236165	0.681115	0.91162
GO_PROTEASOMAL_PROTEIN_CATABOLIC_PROCESS	-0.224893	0.686747	0.913149
GO_ION_TRANSMEMBRANE_TRANSPORTER_ACTIVITY	-0.221375	0.698795	0.91562
GO_POSITIVE_REGULATION_OF_SUPRAMOLECULAR_FIBER_ORGANIZATION	-0.222071	0.717593	0.919616
GO_PROTEIN_CONTAINING_COMPLEX_DISASSEMBLY	-0.237918	0.704992	0.922449
GO_REGULATION_OF_RESPONSE_TO_STRESS	-0.16119	0.768638	0.92726
GO_MEMBRANE_PROTEIN_COMPLEX	-0.174836	0.763265	0.942391
GO_DNA_BINDING_TRANSCRIPTION_FACTOR_ACTIVITY_RNA_POLYMERASE_II_SPECIFIC	-0.216782	0.737327	0.943256
GO_REGULATION_OF_CELLULAR_COMPONENT_SIZE	-0.192095	0.751437	0.943961
GO_DNA_BINDING_TRANSCRIPTION_FACTOR_ACTIVITY	-0.216782	0.737805	0.944528
GO_TERTIARY_GRANULE	-0.204684	0.772171	0.944689
GO_POSITIVE_REGULATION_OF_CATABOLIC_PROCESS	-0.214417	0.751479	0.945155
GO_POSITIVE_REGULATION_OF_NUCLEOBASE_CONTAINING_COMPOUND_METABOLIC_PROCESS	-0.16904	0.772251	0.945908
GO_LIPID_BIOSYNTHETIC_PROCESS	-0.208724	0.72782	0.946415
GO_CELLULAR_RESPONSE_TO_TOXIC_SUBSTANCE	-0.211288	0.783537	0.949006
GO_LAMELLIPODIUM	-0.216439	0.803053	0.964164
GO_PROTEIN_COMPLEX_OLIGOMERIZATION	-0.190524	0.797671	0.965122
GO_RESPONSE_TO_STEROID_HORMONE	-0.222571	0.776744	0.965631
GO_POSITIVE_REGULATION_OF_PROTEOLYSIS	-0.194534	0.80659	0.966759
GO_ENDOMEMBRANE_SYSTEM_ORGANIZATION	-0.207001	0.786963	0.968016
GO_TRANSPORTER_ACTIVITY	-0.172934	0.832178	0.969521
GO_PROTEIN_CONTAINING_COMPLEX_BINDING	-0.14499	0.882431	0.970251
GO_MONOVALENT_INORGANIC_CATION_TRANSPORT	-0.198752	0.831071	0.97077
GO_VESICLE_MEMBRANE	-0.161043	0.826846	0.97121
GO_CELL_PART_MORPHOGENESIS	-0.196451	0.834821	0.971442
GO_CALCIUM_ION_TRANSMEMBRANE_TRANSPORT	-0.215774	0.823161	0.972502
GO_CELL_LEADING_EDGE	-0.166338	0.852321	0.972682
GO_RESPONSE_TO_OXYGEN_CONTAINING_COMPOUND	-0.139785	0.870889	0.973187
GO_ZINC_ION_BINDING	-0.21943	0.806835	0.973474
GO_POSITIVE_REGULATION_OF_CELLULAR_CATABOLIC_PROCESS	-0.195567	0.834575	0.975553
GO_RESPONSE_TO_ORGANIC_CYCLIC_COMPOUND	-0.159437	0.873469	0.976276
GO_POSITIVE_REGULATION_OF_CYTOSKELETON_ORGANIZATION	-0.193454	0.83707	0.977423
GO_RESPONSE_TO_NITROGEN_COMPOUND	-0.14503	0.86828	0.977797
GO_DOUBLE_STRANDED_DNA_BINDING	-0.175172	0.87	0.978618
GO_COFACTOR_BINDING	-0.210152	0.833333	0.978745
GO_POSITIVE_REGULATION_OF_CELLULAR_COMPONENT_BIOGENESIS	-0.168702	0.882789	0.980813
GO_ENVELOPE	-0.147177	0.911685	0.981022
GO_NUCLEAR_OUTER_MEMBRANE_ENDOPLASMIC_RETICULUM_MEMBRANE_NETWORK	-0.160061	0.876453	0.98108
GO_AZUROPHIL_GRANULE	-0.189413	0.841791	0.981375
GO_CARBOHYDRATE_METABOLIC_PROCESS	-0.168846	0.89233	0.981492
GO_TRANSCRIPTION_REGULATOR_ACTIVITY	-0.165006	0.893648	0.982558
GO_PLASMA_MEMBRANE_REGION	-0.157223	0.887283	0.982888
GO_NEGATIVE_REGULATION_OF_CELL_CYCLE	-0.174898	0.894815	0.985682
GO_RESPONSE_TO_REACTIVE_OXYGEN_SPECIES	-0.12739	0.993884	0.997038
GO_SEQUENCE_SPECIFIC_DNA_BINDING	-0.117281	0.982734	0.997401
GO_REGULATION_OF_PROTEIN_CATABOLIC_PROCESS	-0.117175	0.988522	0.99749
GO_REGULATION_OF_CELLULAR_CATABOLIC_PROCESS	-0.0799982	0.998628	0.998999
GO_RESPONSE_TO_METAL_ION	-0.13365	0.975645	0.999521

## Sheet: C2 VS C3
GO UP in C3	ES	NOM p-val	FDR q-val
GO_GAMETE_GENERATION	-0.456223	0	0.173187
GO_ENDOPEPTIDASE_ACTIVITY	-0.453658	0.00333333	0.210002
GO_POSITIVE_REGULATION_OF_CYTOKINE_SECRETION	-0.513823	0.00374532	0.214635
GO_SEXUAL_REPRODUCTION	-0.377498	0.00411523	0.231636
GO_CELLULAR_COMPONENT_DISASSEMBLY	-0.360253	0	0.248867
GO_LIPID_CATABOLIC_PROCESS	-0.432279	0.00307692	0.2818
GO_POSITIVE_REGULATION_OF_PEPTIDE_SECRETION	-0.371905	0.00396825	0.3059
GO_MULTI_ORGANISM_REPRODUCTIVE_PROCESS	-0.301528	0.00966184	0.306863
GO_TISSUE_REMODELING	-0.358392	0.0355987	0.318535
GO_LEUKOCYTE_MEDIATED_IMMUNITY	-0.24189	0.00909091	0.326086
GO_SKELETAL_SYSTEM_MORPHOGENESIS	-0.427354	0.0389222	0.33436
GO_LYMPHOCYTE_MEDIATED_IMMUNITY	-0.344391	0.045977	0.33846
GO_INTEGRIN_BINDING	-0.461372	0.00290698	0.339081
GO_REGULATION_OF_SYNAPTIC_PLASTICITY	-0.434113	0.0369231	0.342189
GO_STRUCTURAL_CONSTITUENT_OF_RIBOSOME	-0.330436	0.00421941	0.353796
GO_REGULATION_OF_CELLULAR_RESPONSE_TO_GROWTH_FACTOR_STIMULUS	-0.355823	0.0206186	0.361243
GO_INTERLEUKIN_1_PRODUCTION	-0.350208	0.0331126	0.365434
GO_NEUROINFLAMMATORY_RESPONSE	-0.418894	0.0628743	0.366574
GO_PEPTIDASE_ACTIVITY	-0.308211	0.0211864	0.366847
GO_LARGE_RIBOSOMAL_SUBUNIT	-0.338918	0.04811	0.368082
GO_PEPTIDE_SECRETION	-0.244184	0.0555556	0.368354
GO_LATE_ENDOSOME	-0.30551	0.0795848	0.369464
GO_SECOND_MESSENGER_MEDIATED_SIGNALING	-0.281859	0.0942623	0.369655
GO_TISSUE_HOMEOSTASIS	-0.359502	0.100629	0.369756
GO_REGULATION_OF_PEPTIDE_SECRETION	-0.298624	0.00900901	0.371109
GO_FICOLIN_1_RICH_GRANULE	-0.307108	0.0915493	0.371115
GO_GLYCOPROTEIN_METABOLIC_PROCESS	-0.328024	0.0506757	0.372027
GO_POSITIVE_REGULATION_OF_SECRETION	-0.257748	0.0843373	0.372326
GO_REGULATION_OF_NIK_NF_KAPPAB_SIGNALING	-0.378542	0.0858896	0.37256
GO_LYSOSOMAL_LUMEN	-0.378446	0.088685	0.373795
GO_ORGANELLE_INNER_MEMBRANE	-0.277679	0.0839161	0.374325
GO_INTERLEUKIN_1_BETA_PRODUCTION	-0.445788	0.00949367	0.374843
GO_FATTY_ACID_DERIVATIVE_METABOLIC_PROCESS	-0.353813	0.111446	0.375004
GO_DEVELOPMENTAL_PROCESS_INVOLVED_IN_REPRODUCTION	-0.272851	0.0140187	0.375111
GO_CYTOKINE_BINDING	-0.331707	0.0986842	0.377715
GO_NEGATIVE_REGULATION_OF_CELLULAR_RESPONSE_TO_TRANSFORMING_GROWTH_FACTOR_BETA_STIMULUS	-0.38409	0.0776397	0.378289
GO_POSITIVE_REGULATION_OF_INTERLEUKIN_6_PRODUCTION	-0.343153	0.096463	0.379304
GO_NEGATIVE_REGULATION_OF_TRANSMEMBRANE_RECEPTOR_PROTEIN_SERINE_THREONINE_KINASE_SIGNALING_PATHWAY	-0.442142	0.0243902	0.379863
GO_SYNAPSE_ORGANIZATION	-0.295412	0.0632411	0.380093
GO_RIBOSOMAL_SUBUNIT	-0.300339	0.0174673	0.380418
GO_EXTRACELLULAR_STRUCTURE_ORGANIZATION	-0.369273	0.0147059	0.380472
GO_PEPTIDE_BINDING	-0.333831	0.0733945	0.38492
GO_POSITIVE_REGULATION_OF_CELLULAR_PROTEIN_CATABOLIC_PROCESS	-0.374383	0.0945559	0.385559
GO_NUCLEAR_TRANSCRIBED_MRNA_CATABOLIC_PROCESS_NONSENSE_MEDIATED_DECAY	-0.307213	0.0329218	0.385604
GO_MALE_GAMETE_GENERATION	-0.340822	0.134557	0.385629
GO_MYELOID_LEUKOCYTE_ACTIVATION	-0.204869	0	0.38611
GO_RIBOSOME_BIOGENESIS	-0.297389	0.0960854	0.387924
GO_INTRINSIC_COMPONENT_OF_PLASMA_MEMBRANE	-0.205785	0.0322581	0.387995
GO_REGULATION_OF_ENDOCYTOSIS	-0.307455	0.108626	0.388082
GO_CELL_ACTIVATION_INVOLVED_IN_IMMUNE_RESPONSE	-0.201395	0.00813008	0.388845
GO_MACROPHAGE_ACTIVATION	-0.337927	0.0892308	0.390483
GO_ADAPTIVE_IMMUNE_RESPONSE_BASED_ON_SOMATIC_RECOMBINATION_OF_IMMUNE_RECEPTORS_BUILT_FROM_IMMUNOGLOBULIN_SUPERFAMILY_DOMAINS	-0.275679	0.0807692	0.390655
GO_NEGATIVE_REGULATION_OF_CELLULAR_RESPONSE_TO_GROWTH_FACTOR_STIMULUS	-0.388911	0.0430769	0.390683
GO_CYTOSOLIC_LARGE_RIBOSOMAL_SUBUNIT	-0.373651	0.028169	0.391727
GO_INTEGRIN_MEDIATED_SIGNALING_PATHWAY	-0.356386	0.066879	0.393205
GO_AZUROPHIL_GRANULE	-0.288026	0.0882353	0.393792
GO_ESTABLISHMENT_OF_PROTEIN_LOCALIZATION_TO_ENDOPLASMIC_RETICULUM	-0.282379	0.045283	0.394549
GO_PLASMA_MEMBRANE_PROTEIN_COMPLEX	-0.274922	0.0822511	0.396117
GO_POSITIVE_REGULATION_OF_LEUKOCYTE_PROLIFERATION	-0.373859	0.0454545	0.397658
GO_RIBOSOME	-0.264637	0.028436	0.397672
GO_POSITIVE_REGULATION_OF_ENDOCYTOSIS	-0.356393	0.0962733	0.398489
GO_LIPID_BIOSYNTHETIC_PROCESS	-0.280775	0.0661479	0.398953
GO_PLASMA_MEMBRANE_SIGNALING_RECEPTOR_COMPLEX	-0.416793	0.0432099	0.400092
GO_NEGATIVE_REGULATION_OF_CELL_DIFFERENTIATION	-0.276637	0.0239234	0.400542
GO_POSITIVE_REGULATION_OF_PROTEIN_KINASE_B_SIGNALING	-0.354856	0.137615	0.401311
GO_NEGATIVE_REGULATION_OF_LYMPHOCYTE_ACTIVATION	-0.328402	0.0777385	0.40314
GO_RESPONSE_TO_TRANSFORMING_GROWTH_FACTOR_BETA	-0.303024	0.0301887	0.404267
GO_B_CELL_MEDIATED_IMMUNITY	-0.369256	0.05	0.406221
GO_COTRANSLATIONAL_PROTEIN_TARGETING_TO_MEMBRANE	-0.271605	0.0436893	0.408004
GO_REGULATION_OF_GLIOGENESIS	-0.385084	0.0794118	0.40806
GO_SMALL_RIBOSOMAL_SUBUNIT	-0.334986	0.131498	0.410656
GO_POSITIVE_REGULATION_OF_ESTABLISHMENT_OF_PROTEIN_LOCALIZATION	-0.257515	0.0487805	0.412678
GO_REGULATION_OF_LIPID_METABOLIC_PROCESS	-0.329275	0.0509091	0.413489
GO_LOCOMOTORY_BEHAVIOR	-0.34896	0.122093	0.414347
GO_MOLECULAR_TRANSDUCER_ACTIVITY	-0.237035	0.0418848	0.414416
GO_SKELETAL_SYSTEM_DEVELOPMENT	-0.278827	0.0251046	0.414619
GO_CELL_SURFACE	-0.234784	0.0306122	0.414906
GO_NEGATIVE_REGULATION_OF_CELL_ACTIVATION	-0.299173	0.0553506	0.415002
GO_POSITIVE_REGULATION_OF_PROTEIN_CATABOLIC_PROCESS	-0.349242	0.0825688	0.419305
GO_MULTICELLULAR_ORGANISM_REPRODUCTION	-0.317212	0.0143369	0.420083
GO_RECEPTOR_COMPLEX	-0.29565	0.0752688	0.421447
GO_CYTOSOLIC_RIBOSOME	-0.31463	0.0042735	0.435252
GO_VACUOLE	-0.200048	0.0740741	0.443995
GO_PROTEIN_LOCALIZATION_TO_ENDOPLASMIC_RETICULUM	-0.243433	0.136564	0.444321
GO_REGULATION_OF_SECRETION	-0.213714	0.0909091	0.448569
GO_OXIDATION_REDUCTION_PROCESS	-0.228572	0.115044	0.448866
GO_ORGANIC_ACID_BIOSYNTHETIC_PROCESS	-0.315466	0.163934	0.449814
GO_REGULATION_OF_CELL_KILLING	-0.344736	0.156425	0.44982
GO_CYTOPLASMIC_TRANSLATION	-0.292975	0.116438	0.45066
GO_CALCIUM_MEDIATED_SIGNALING	-0.299024	0.115756	0.453772
GO_CYTOKINE_SECRETION	-0.248981	0.135338	0.474024
GO_SMALL_MOLECULE_CATABOLIC_PROCESS	-0.343639	0.174699	0.474483
GO_TRANSFORMING_GROWTH_FACTOR_BETA_RECEPTOR_SIGNALING_PATHWAY	-0.289961	0.170819	0.474758
GO_CYTOSOLIC_SMALL_RIBOSOMAL_SUBUNIT	-0.327065	0.180473	0.476573
GO_REGULATION_OF_CELLULAR_RESPONSE_TO_TRANSFORMING_GROWTH_FACTOR_BETA_STIMULUS	-0.318082	0.176656	0.477275
GO_POSITIVE_REGULATION_OF_T_CELL_PROLIFERATION	-0.325673	0.166181	0.478549
GO_POSITIVE_REGULATION_OF_NERVOUS_SYSTEM_DEVELOPMENT	-0.235977	0.140909	0.478989
GO_MACROPHAGE_MIGRATION	-0.341009	0.207547	0.47945
GO_SYNAPTIC_SIGNALING	-0.25359	0.15625	0.480676
GO_PHOSPHOLIPID_BIOSYNTHETIC_PROCESS	-0.332077	0.153153	0.48083
GO_NEGATIVE_REGULATION_OF_APOPTOTIC_SIGNALING_PATHWAY	-0.267605	0.126394	0.481246
GO_IMMUNE_RECEPTOR_ACTIVITY	-0.307427	0.171014	0.481288
GO_ANATOMICAL_STRUCTURE_HOMEOSTASIS	-0.258777	0.161404	0.481837
GO_POSITIVE_REGULATION_OF_CELL_ACTIVATION	-0.227844	0.127451	0.482662
GO_MONOVALENT_INORGANIC_CATION_TRANSPORT	-0.262772	0.16726	0.483315
GO_POSITIVE_REGULATION_OF_VASCULATURE_DEVELOPMENT	-0.266329	0.192171	0.484363
GO_REGULATION_OF_ESTABLISHMENT_OF_PROTEIN_LOCALIZATION	-0.20559	0.127907	0.486899
GO_REGULATION_OF_TRANSMEMBRANE_RECEPTOR_PROTEIN_SERINE_THREONINE_KINASE_SIGNALING_PATHWAY	-0.296485	0.185185	0.487846
GO_TRANSLATIONAL_INITIATION	-0.223021	0.173709	0.499416
GO_PROTEIN_PROCESSING	-0.304413	0.227564	0.500184
GO_CELLULAR_KETONE_METABOLIC_PROCESS	-0.291189	0.210884	0.501614
GO_POSITIVE_REGULATION_OF_I_KAPPAB_KINASE_NF_KAPPAB_SIGNALING	-0.277231	0.208075	0.50178
GO_COFACTOR_BINDING	-0.277562	0.180064	0.502111
GO_POSITIVE_REGULATION_OF_LYMPHOCYTE_DIFFERENTIATION	-0.316528	0.214286	0.502258
GO_ANTIGEN_PROCESSING_AND_PRESENTATION	-0.235518	0.185874	0.503766
GO_POSITIVE_REGULATION_OF_CYSTEINE_TYPE_ENDOPEPTIDASE_ACTIVITY	-0.309211	0.207207	0.50923
GO_POSITIVE_REGULATION_OF_CYTOKINE_PRODUCTION	-0.204918	0.191589	0.511764
GO_ACTIVATION_OF_MAPK_ACTIVITY	-0.294066	0.215385	0.51224
GO_PROTEIN_MATURATION	-0.273423	0.241158	0.512323
GO_CARBOHYDRATE_DERIVATIVE_CATABOLIC_PROCESS	-0.311273	0.20339	0.512385
GO_POSITIVE_REGULATION_OF_VIRAL_PROCESS	-0.30495	0.222552	0.513655
GO_ENDOSOME	-0.186715	0.186747	0.51368
GO_DETECTION_OF_STIMULUS	-0.300187	0.224684	0.514164
GO_POSITIVE_REGULATION_OF_MAP_KINASE_ACTIVITY	-0.262439	0.175627	0.5151
GO_REGIONALIZATION	-0.31315	0.196532	0.515111
GO_REGULATION_OF_REACTIVE_OXYGEN_SPECIES_BIOSYNTHETIC_PROCESS	-0.31105	0.233429	0.519062
GO_LIPID_LOCALIZATION	-0.255089	0.213333	0.520374
GO_NEGATIVE_REGULATION_OF_DEFENSE_RESPONSE	-0.263735	0.214286	0.520972
GO_REGULATION_OF_TRANS_SYNAPTIC_SIGNALING	-0.251701	0.222603	0.52123
GO_REGULATION_OF_PROTEASOMAL_PROTEIN_CATABOLIC_PROCESS	-0.276693	0.242812	0.523049
GO_BONE_DEVELOPMENT	-0.276473	0.237342	0.52411
GO_COATED_VESICLE	-0.27267	0.197987	0.527199
GO_CYTOKINE_RECEPTOR_ACTIVITY	-0.311952	0.249258	0.529334
GO_FATTY_ACID_METABOLIC_PROCESS	-0.266848	0.221885	0.531547
GO_RESPONSE_TO_ETHANOL	-0.31493	0.246291	0.535326
GO_REGULATION_OF_MAP_KINASE_ACTIVITY	-0.231426	0.237705	0.537897
GO_RIBOSE_PHOSPHATE_BIOSYNTHETIC_PROCESS	-0.294004	0.261006	0.538881
GO_NEGATIVE_REGULATION_OF_CELL_DEVELOPMENT	-0.256055	0.258278	0.538899
GO_EARLY_ENDOSOME	-0.24207	0.239726	0.539204
GO_REACTIVE_OXYGEN_SPECIES_BIOSYNTHETIC_PROCESS	-0.2984	0.259259	0.53971
GO_MULTI_MULTICELLULAR_ORGANISM_PROCESS	-0.274907	0.244755	0.540981
GO_OXIDOREDUCTASE_ACTIVITY	-0.219538	0.235521	0.541588
GO_RIBONUCLEOPROTEIN_COMPLEX_SUBUNIT_ORGANIZATION	-0.283263	0.315457	0.542335
GO_MAINTENANCE_OF_LOCATION	-0.242957	0.274074	0.544268
GO_NEGATIVE_REGULATION_OF_NEURON_PROJECTION_DEVELOPMENT	-0.301724	0.317808	0.544513
GO_CELL_MATRIX_ADHESION	-0.252626	0.25	0.544964
GO_POSITIVE_REGULATION_OF_LOCOMOTION	-0.184527	0.276316	0.545817
GO_NEURON_TO_NEURON_SYNAPSE	-0.244537	0.257426	0.546446
GO_STEROID_METABOLIC_PROCESS	-0.295037	0.273026	0.546684
GO_POSITIVE_REGULATION_OF_SMALL_MOLECULE_METABOLIC_PROCESS	-0.305092	0.276074	0.54711
GO_ORGANIC_ACID_TRANSPORT	-0.26917	0.271523	0.547168
GO_TRANSFERASE_ACTIVITY_TRANSFERRING_GLYCOSYL_GROUPS	-0.295808	0.287462	0.547874
GO_BEHAVIOR	-0.221189	0.280156	0.547919
GO_TERTIARY_GRANULE	-0.233111	0.258687	0.548103
GO_GLIOGENESIS	-0.221922	0.234375	0.548493
GO_CELL_KILLING	-0.27925	0.279874	0.54866
GO_CELL_CELL_JUNCTION_ORGANIZATION	-0.269373	0.275862	0.549287
GO_REGULATION_OF_PROTEIN_LOCALIZATION	-0.176307	0.239437	0.549698
GO_CELLULAR_LIPID_METABOLIC_PROCESS	-0.197785	0.243243	0.551082
GO_LEUKOCYTE_PROLIFERATION	-0.220546	0.343874	0.554039
GO_NEGATIVE_REGULATION_OF_CELL_PROJECTION_ORGANIZATION	-0.301724	0.305785	0.555098
GO_DNA_CONFORMATION_CHANGE	-0.289746	0.285266	0.556507
GO_SIDE_OF_MEMBRANE	-0.201213	0.284483	0.558899
GO_REGULATION_OF_PROTEIN_CATABOLIC_PROCESS	-0.215793	0.25	0.5594
GO_EXTERNAL_SIDE_OF_PLASMA_MEMBRANE	-0.22711	0.292135	0.559529
GO_VESICLE_MEMBRANE	-0.177584	0.279503	0.561075
GO_ANTIGEN_PROCESSING_AND_PRESENTATION_OF_PEPTIDE_OR_POLYSACCHARIDE_ANTIGEN_VIA_MHC_CLASS_II	-0.283308	0.298742	0.570788
GO_SYNAPSE	-0.170162	0.31677	0.57917
GO_REGULATION_OF_APOPTOTIC_SIGNALING_PATHWAY	-0.189982	0.366812	0.580379
GO_ORGANONITROGEN_COMPOUND_CATABOLIC_PROCESS	-0.162546	0.294118	0.58078
GO_PROTEIN_TARGETING_TO_MEMBRANE	-0.19687	0.333333	0.582686
GO_PROTEIN_TARGETING	-0.183042	0.341122	0.58346
GO_NEGATIVE_REGULATION_OF_INFLAMMATORY_RESPONSE	-0.266669	0.346505	0.583591
GO_ACTIVATION_OF_PROTEIN_KINASE_ACTIVITY	-0.222804	0.33452	0.584876
GO_NEGATIVE_REGULATION_OF_NERVOUS_SYSTEM_DEVELOPMENT	-0.249073	0.31457	0.585839
GO_REGULATION_OF_REACTIVE_OXYGEN_SPECIES_METABOLIC_PROCESS	-0.233481	0.341379	0.593637
GO_MITOCHONDRIAL_PROTEIN_COMPLEX	-0.252404	0.362745	0.600002
GO_POSITIVE_REGULATION_OF_CELL_DEVELOPMENT	-0.19131	0.349558	0.600916
GO_DEVELOPMENTAL_MATURATION	-0.263506	0.347962	0.602246
GO_MONOCARBOXYLIC_ACID_METABOLIC_PROCESS	-0.210107	0.395257	0.603844
GO_CELLULAR_RESPIRATION	-0.25566	0.320988	0.605139
GO_PROTEIN_CONTAINING_COMPLEX_BINDING	-0.162193	0.342105	0.606373
GO_RENAL_SYSTEM_DEVELOPMENT	-0.260957	0.361111	0.608864
GO_REGULATION_OF_B_CELL_ACTIVATION	-0.251786	0.366242	0.609795
GO_RIBONUCLEOPROTEIN_COMPLEX_BIOGENESIS	-0.213898	0.349265	0.610386
GO_POSITIVE_REGULATION_OF_CELL_GROWTH	-0.263028	0.37931	0.61061
GO_LEUKOCYTE_HOMEOSTASIS	-0.282492	0.406528	0.615844
GO_ORGANOPHOSPHATE_BIOSYNTHETIC_PROCESS	-0.195993	0.409483	0.618648
GO_TRANSMEMBRANE_RECEPTOR_PROTEIN_SERINE_THREONINE_KINASE_SIGNALING_PATHWAY	-0.211639	0.387833	0.619043
GO_NIK_NF_KAPPAB_SIGNALING	-0.234731	0.394834	0.620753
GO_ELECTRON_TRANSPORT_CHAIN	-0.251918	0.39322	0.62323
GO_STRUCTURAL_MOLECULE_ACTIVITY	-0.171448	0.411458	0.625106
GO_MONOSACCHARIDE_METABOLIC_PROCESS	-0.241849	0.37299	0.625988
GO_PROTEIN_CATABOLIC_PROCESS	-0.1633	0.355705	0.627839
GO_REGULATION_OF_PROTEIN_BINDING	-0.227144	0.383901	0.62811
GO_REGULATION_OF_LEUKOCYTE_MEDIATED_IMMUNITY	-0.226068	0.395018	0.62876
GO_RIBOSOME_ASSEMBLY	-0.278227	0.433022	0.635192
GO_ANTIGEN_PROCESSING_AND_PRESENTATION_OF_PEPTIDE_ANTIGEN	-0.205789	0.410256	0.636581
GO_POSTSYNAPSE	-0.181765	0.390698	0.63717
GO_REGULATION_OF_PRODUCTION_OF_MOLECULAR_MEDIATOR_OF_IMMUNE_RESPONSE	-0.273369	0.421384	0.637419
GO_GOLGI_APPARATUS	-0.160522	0.417808	0.637661
GO_PHOSPHOLIPID_METABOLIC_PROCESS	-0.214561	0.428115	0.641743
GO_RESPIRATORY_SYSTEM_DEVELOPMENT	-0.268545	0.463277	0.642165
GO_SULFUR_COMPOUND_METABOLIC_PROCESS	-0.225069	0.418367	0.642185
GO_PATTERN_SPECIFICATION_PROCESS	-0.248174	0.444785	0.651213
GO_NUCLEAR_TRANSCRIBED_MRNA_CATABOLIC_PROCESS	-0.179035	0.45614	0.652339
GO_AMMONIUM_ION_METABOLIC_PROCESS	-0.268533	0.429487	0.654231
GO_REGULATION_OF_CELLULAR_PROTEIN_CATABOLIC_PROCESS	-0.221723	0.449827	0.654909
GO_GTPASE_REGULATOR_ACTIVITY	-0.240533	0.472131	0.65903
GO_REGULATION_OF_CELLULAR_KETONE_METABOLIC_PROCESS	-0.262433	0.467262	0.663894
GO_REGULATION_OF_PROTEIN_STABILITY	-0.204447	0.47931	0.666044
GO_CARBOHYDRATE_DERIVATIVE_METABOLIC_PROCESS	-0.166975	0.474227	0.669412
GO_POSITIVE_REGULATION_OF_PROTEIN_SERINE_THREONINE_KINASE_ACTIVITY	-0.196627	0.473684	0.676133
GO_POSITIVE_REGULATION_OF_PROTEOLYSIS	-0.183443	0.476562	0.677579
GO_VIRAL_GENE_EXPRESSION	-0.170684	0.486239	0.679852
GO_REGULATION_OF_LYMPHOCYTE_MEDIATED_IMMUNITY	-0.241789	0.480337	0.688371
GO_NEGATIVE_REGULATION_OF_SECRETION	-0.217039	0.49481	0.692633
GO_NCRNA_METABOLIC_PROCESS	-0.246442	0.459877	0.700349
GO_NCRNA_PROCESSING	-0.246442	0.486726	0.701315
GO_GLIAL_CELL_DEVELOPMENT	-0.250478	0.488372	0.716778
GO_POSITIVE_REGULATION_OF_CELLULAR_CATABOLIC_PROCESS	-0.188861	0.528302	0.728011
GO_GTPASE_ACTIVITY	-0.202907	0.515254	0.73402
GO_PURINE_CONTAINING_COMPOUND_BIOSYNTHETIC_PROCESS	-0.231888	0.528481	0.740968
GO_ORGANIC_ANION_TRANSPORT	-0.209068	0.554795	0.746007
GO_REGULATION_OF_PROTEIN_SERINE_THREONINE_KINASE_ACTIVITY	-0.167705	0.575893	0.755657
GO_REGULATION_OF_CELL_DIVISION	-0.244836	0.529968	0.757045
GO_NUCLEOSIDE_TRIPHOSPHATASE_REGULATOR_ACTIVITY	-0.216983	0.54717	0.77061
GO_ACTOMYOSIN_STRUCTURE_ORGANIZATION	-0.213718	0.546429	0.772925
GO_MACROMOLECULE_CATABOLIC_PROCESS	-0.123713	0.651685	0.786373
GO_GLYCEROLIPID_METABOLIC_PROCESS	-0.193787	0.568493	0.790138
GO_EMBRYONIC_ORGAN_MORPHOGENESIS	-0.226731	0.579268	0.792603
GO_NERVOUS_SYSTEM_PROCESS	-0.159915	0.593886	0.793506
GO_VACUOLE_ORGANIZATION	-0.236351	0.575221	0.794766
GO_PROTEOLYSIS	-0.128797	0.694215	0.795075
GO_EPITHELIAL_TUBE_MORPHOGENESIS	-0.206877	0.596429	0.795188
GO_GLYCOSYLATION	-0.229375	0.593548	0.795753
GO_ESTABLISHMENT_OF_PROTEIN_LOCALIZATION_TO_MEMBRANE	-0.150178	0.700508	0.805765
GO_POSITIVE_REGULATION_OF_NF_KAPPAB_TRANSCRIPTION_FACTOR_ACTIVITY	-0.214517	0.584337	0.827568
GO_POSITIVE_REGULATION_OF_CATABOLIC_PROCESS	-0.17079	0.644628	0.838271
GO_REGULATION_OF_SMALL_GTPASE_MEDIATED_SIGNAL_TRANSDUCTION	-0.202591	0.618644	0.839328
GO_T_CELL_PROLIFERATION	-0.192508	0.669173	0.839809
GO_ORGANELLE_ASSEMBLY	-0.150925	0.719626	0.844126
GO_REGULATION_OF_CELL_SIZE	-0.224312	0.627907	0.854989
GO_HEMATOPOIETIC_PROGENITOR_CELL_DIFFERENTIATION	-0.20904	0.645902	0.86301
GO_CYTOPLASMIC_SIDE_OF_MEMBRANE	-0.194944	0.682274	0.86546
GO_G_PROTEIN_COUPLED_RECEPTOR_ACTIVITY	-0.205745	0.676647	0.866599
GO_INORGANIC_ION_TRANSMEMBRANE_TRANSPORT	-0.149983	0.738095	0.87475
GO_POSITIVE_REGULATION_OF_PROTEIN_LOCALIZATION_TO_MEMBRANE	-0.210714	0.697329	0.877861
GO_POSITIVE_REGULATION_OF_APOPTOTIC_SIGNALING_PATHWAY	-0.178018	0.685619	0.878288
GO_POSITIVE_REGULATION_OF_GROWTH	-0.174813	0.702206	0.884136
GO_CELLULAR_MACROMOLECULE_CATABOLIC_PROCESS	-0.11557	0.847458	0.890744
GO_CARBOHYDRATE_METABOLIC_PROCESS	-0.159538	0.747788	0.89179
GO_SEX_DIFFERENTIATION	-0.201076	0.73817	0.892235
GO_REGULATION_OF_CYTOSOLIC_CALCIUM_ION_CONCENTRATION	-0.158778	0.74031	0.893587
GO_INTERLEUKIN_1_MEDIATED_SIGNALING_PATHWAY	-0.197798	0.715942	0.893943
GO_POLYSOME	-0.198632	0.737374	0.894304
GO_COFACTOR_BIOSYNTHETIC_PROCESS	-0.188269	0.714744	0.894888
GO_MEMBRANE_LIPID_METABOLIC_PROCESS	-0.204523	0.71246	0.89643
GO_TRANSCRIPTION_COREPRESSOR_ACTIVITY	-0.18831	0.751592	0.900965
GO_POSITIVE_REGULATION_OF_MULTI_ORGANISM_PROCESS	-0.132032	0.845	0.901807
GO_PEPTIDE_METABOLIC_PROCESS	-0.117875	0.867089	0.914225
GO_ESTABLISHMENT_OF_PROTEIN_LOCALIZATION_TO_ORGANELLE	-0.123031	0.858974	0.915702
GO_TRANSPORT_VESICLE	-0.191403	0.773163	0.916197
GO_PROTEASOMAL_PROTEIN_CATABOLIC_PROCESS	-0.137684	0.794643	0.916388
GO_GLYCEROPHOSPHOLIPID_METABOLIC_PROCESS	-0.171525	0.779553	0.917151
GO_HYDROLASE_ACTIVITY_ACTING_ON_ACID_ANHYDRIDES	-0.134168	0.840816	0.918777
GO_MEMBRANE_PROTEIN_COMPLEX	-0.120801	0.822485	0.918901
GO_POSITIVE_REGULATION_OF_DNA_BINDING_TRANSCRIPTION_FACTOR_ACTIVITY	-0.176609	0.779553	0.919389
GO_CELLULAR_PROTEIN_CATABOLIC_PROCESS	-0.122265	0.84492	0.919791
GO_GLIAL_CELL_DIFFERENTIATION	-0.164939	0.797342	0.922664
GO_GENERATION_OF_PRECURSOR_METABOLITES_AND_ENERGY	-0.14157	0.806324	0.93169
GO_POSITIVE_REGULATION_OF_CELL_CYCLE_PROCESS	-0.1561	0.789286	0.93792
GO_REGULATION_OF_PROTEOLYSIS	-0.121313	0.898477	0.938315
GO_GLYCOPROTEIN_BIOSYNTHETIC_PROCESS	-0.1841	0.851852	0.940457
GO_POSITIVE_REGULATION_OF_CELLULAR_PROTEIN_LOCALIZATION	-0.137372	0.793722	0.943395
GO_DEVELOPMENT_OF_PRIMARY_SEXUAL_CHARACTERISTICS	-0.175666	0.830769	0.950785
GO_PROTON_TRANSMEMBRANE_TRANSPORT	-0.185769	0.832279	0.953281
GO_LEUKOCYTE_APOPTOTIC_PROCESS	-0.171399	0.839506	0.955361
GO_APOPTOTIC_MITOCHONDRIAL_CHANGES	-0.184991	0.854545	0.955556
GO_REGULATION_OF_SIGNAL_TRANSDUCTION_BY_P53_CLASS_MEDIATOR	-0.161839	0.855856	0.958015
GO_MITOCHONDRION_ORGANIZATION	-0.133394	0.891892	0.961015
GO_MITOCHONDRIAL_TRANSPORT	-0.155038	0.824104	0.961221
GO_PROTEIN_MODIFICATION_BY_SMALL_PROTEIN_REMOVAL	-0.149763	0.85274	0.965172
GO_NUCLEOSIDE_PHOSPHATE_BIOSYNTHETIC_PROCESS	-0.150975	0.90411	0.969733
GO_RIBOSE_PHOSPHATE_METABOLIC_PROCESS	-0.13688	0.891697	0.970136
GO_PROTEIN_CONTAINING_COMPLEX_LOCALIZATION	-0.167451	0.885093	0.970497
GO_POSITIVE_REGULATION_OF_CELL_CYCLE	-0.141186	0.883895	0.971238
GO_CYTOPLASMIC_REGION	-0.167031	0.871508	0.972114
GO_CELLULAR_AMIDE_METABOLIC_PROCESS	-0.0937691	0.979592	0.972591
GO_ESTABLISHMENT_OF_LOCALIZATION_IN_CELL	-0.129771	0.932	0.986671
GO_DENDRITE_DEVELOPMENT	-0.143923	0.907591	0.99451
GO_ENERGY_DERIVATION_BY_OXIDATION_OF_ORGANIC_COMPOUNDS	-0.138485	0.950311	0.994995
GO_REGULATION_OF_WOUND_HEALING	-0.144331	0.944444	0.995829
GO_ENDOPLASMIC_RETICULUM_TO_GOLGI_VESICLE_MEDIATED_TRANSPORT	-0.132993	0.976401	0.998148
GO_ATP_METABOLIC_PROCESS	-0.08299	1	0.99855
GO_RNA_CATABOLIC_PROCESS	-0.0759227	0.995074	0.99864
GO_INTRINSIC_COMPONENT_OF_ORGANELLE_MEMBRANE	-0.0907217	0.992701	0.999721
GO UP in C2	ES	NOM p-val	FDR q-val
GO_RESPONSE_TO_CHEMOKINE	0.617714	0	0.0612551
GO_VIRAL_GENOME_REPLICATION	0.657657	0	0.0662302
GO_RESPONSE_TO_INTERFERON_GAMMA	0.515245	0	0.0692202
GO_DNA_BINDING_TRANSCRIPTION_ACTIVATOR_ACTIVITY	0.502914	0	0.0707509
GO_RESPONSE_TO_ORGANOPHOSPHORUS	0.627269	0.00286533	0.0724192
GO_MONOCYTE_CHEMOTAXIS	0.659424	0	0.0768356
GO_RESPONSE_TO_PURINE_CONTAINING_COMPOUND	0.610715	0	0.0859652
GO_MONONUCLEAR_CELL_MIGRATION	0.560547	0.00289436	0.11491
GO_LYMPHOCYTE_MIGRATION	0.572107	0.00286533	0.121609
GO_RESPONSE_TO_INTERLEUKIN_1	0.488505	0	0.131452
GO_RESPONSE_TO_ACID_CHEMICAL	0.54492	0.002849	0.131665
GO_CHEMOKINE_RECEPTOR_BINDING	0.623077	0.00308166	0.13782
GO_RESPONSE_TO_FIBROBLAST_GROWTH_FACTOR	0.577738	0.00432277	0.137942
GO_HEPARIN_BINDING	0.591775	0.00769231	0.156579
GO_G_PROTEIN_COUPLED_RECEPTOR_BINDING	0.523592	0.00286123	0.162786
GO_CYTOKINE_MEDIATED_SIGNALING_PATHWAY	0.368336	0	0.164295
GO_RECEPTOR_REGULATOR_ACTIVITY	0.489851	0.00534045	0.165234
GO_EPITHELIAL_CELL_DIFFERENTIATION	0.428292	0.00130378	0.18981
GO_ERBB_SIGNALING_PATHWAY	0.530891	0.01059	0.193692
GO_SULFUR_COMPOUND_BINDING	0.560444	0.00609756	0.19496
GO_CARBOHYDRATE_BINDING	0.573071	0.00614439	0.195582
GO_NEUTROPHIL_MIGRATION	0.522587	0.0014556	0.198577
GO_LEUKOCYTE_CHEMOTAXIS	0.441525	0.0013624	0.199353
GO_FAT_CELL_DIFFERENTIATION	0.569508	0.00455927	0.200795
GO_RESPONSE_TO_CYTOKINE	0.338661	0	0.201997
GO_RESPONSE_TO_VIRUS	0.439431	0.00263852	0.206599
GO_RESPONSE_TO_TUMOR_NECROSIS_FACTOR	0.431297	0.00642674	0.217819
GO_RESPONSE_TO_BIOTIC_STIMULUS	0.326301	0	0.224039
GO_DEFENSE_RESPONSE_TO_OTHER_ORGANISM	0.345848	0	0.225766
GO_CHROMATIN	0.383822	0.00481928	0.230553
GO_DEFENSE_RESPONSE	0.319436	0.00217391	0.230681
GO_RESPONSE_TO_CALCIUM_ION	0.534844	0.0125874	0.231558
GO_NEGATIVE_REGULATION_OF_MULTI_ORGANISM_PROCESS	0.467155	0.0055788	0.231766
GO_GLYCOSAMINOGLYCAN_BINDING	0.478341	0.0129496	0.231861
GO_AXON_DEVELOPMENT	0.429715	0.0119681	0.232407
GO_PLATELET_ALPHA_GRANULE	0.520223	0.0115274	0.232788
GO_ERK1_AND_ERK2_CASCADE	0.407898	0.010101	0.233286
GO_GRANULOCYTE_MIGRATION	0.473163	0.0126404	0.234104
GO_DNA_BINDING_TRANSCRIPTION_FACTOR_ACTIVITY	0.382105	0.00614251	0.234812
GO_DNA_BINDING_TRANSCRIPTION_FACTOR_ACTIVITY_RNA_POLYMERASE_II_SPECIFIC	0.387696	0.0037594	0.235728
GO_EPIDERMAL_CELL_DIFFERENTIATION	0.541171	0.0196375	0.236123
GO_CHROMOSOME	0.350063	0.00352941	0.236886
GO_RESPONSE_TO_ORGANIC_CYCLIC_COMPOUND	0.350566	0.00355872	0.24336
GO_CYTOKINE_ACTIVITY	0.496031	0.0190058	0.24473
GO_RESPONSE_TO_KETONE	0.466605	0.0172662	0.246852
GO_DEFENSE_RESPONSE_TO_VIRUS	0.456253	0.0253165	0.262443
GO_CIRCULATORY_SYSTEM_DEVELOPMENT	0.34212	0.00483092	0.26473
GO_INFLAMMATORY_RESPONSE	0.33758	0.00705882	0.264958
GO_COLLAGEN_CONTAINING_EXTRACELLULAR_MATRIX	0.432894	0.0201072	0.265629
GO_EPIDERMIS_DEVELOPMENT	0.493231	0.0290698	0.266595
GO_POSITIVE_REGULATION_OF_TRANSCRIPTION_BY_RNA_POLYMERASE_II	0.351351	0.00595948	0.267863
GO_POSITIVE_REGULATION_OF_ERK1_AND_ERK2_CASCADE	0.436819	0.0203804	0.268973
GO_RESPONSE_TO_TYPE_I_INTERFERON	0.509178	0.0266272	0.270087
GO_CELLULAR_RESPONSE_TO_ANTIBIOTIC	0.487931	0.0197869	0.276657
GO_RESPONSE_TO_INORGANIC_SUBSTANCE	0.361624	0.020202	0.279897
GO_RESPONSE_TO_CORTICOSTEROID	0.509518	0.0254873	0.281332
GO_INNATE_IMMUNE_RESPONSE	0.327314	0.00347222	0.285246
GO_CELL_CHEMOTAXIS	0.384794	0.0200535	0.296128
GO_MYELOID_LEUKOCYTE_MIGRATION	0.384276	0.0174029	0.306399
GO_NEURON_PROJECTION_GUIDANCE	0.476474	0.0241821	0.306639
GO_STEM_CELL_DIFFERENTIATION	0.456611	0.0391608	0.308034
GO_REGULATION_OF_VIRAL_LIFE_CYCLE	0.487293	0.0381791	0.311226
GO_EXTRACELLULAR_MATRIX	0.39778	0.0286104	0.318745
GO_POSITIVE_REGULATION_OF_GTPASE_ACTIVITY	0.407595	0.0245232	0.322262
GO_RESPONSE_TO_METAL_ION	0.388926	0.025572	0.322915
GO_RESPONSE_TO_TEMPERATURE_STIMULUS	0.484542	0.0326241	0.327578
GO_REGULATION_OF_CELL_MORPHOGENESIS	0.37586	0.0284605	0.332964
GO_LEUKOCYTE_MIGRATION	0.33511	0.0121655	0.33345
GO_RESPONSE_TO_DRUG	0.332136	0.00825472	0.333732
GO_CYTOKINE_RECEPTOR_BINDING	0.423925	0.0348675	0.334951
GO_REGULATION_OF_CELL_DIFFERENTIATION	0.296818	0.00566893	0.335552
GO_INOSITOL_LIPID_MEDIATED_SIGNALING	0.477188	0.0441177	0.337261
GO_RESPONSE_TO_HYDROGEN_PEROXIDE	0.447652	0.04209	0.337916
GO_SIGNALING_RECEPTOR_BINDING	0.308954	0.011236	0.337962
GO_CELLULAR_RESPONSE_TO_ORGANIC_CYCLIC_COMPOUND	0.353108	0.0236318	0.338519
GO_ADAPTIVE_THERMOGENESIS	0.511903	0.0363636	0.338895
GO_PHOSPHOPROTEIN_PHOSPHATASE_ACTIVITY	0.477855	0.0475483	0.340496
GO_HEART_DEVELOPMENT	0.378327	0.0322581	0.341648
GO_MULTICELLULAR_ORGANISM_GROWTH	0.499878	0.0458015	0.342368
GO_NEGATIVE_REGULATION_OF_GROWTH	0.485261	0.0419907	0.342568
GO_POSITIVE_REGULATION_OF_CELL_MORPHOGENESIS_INVOLVED_IN_DIFFERENTIATION	0.497556	0.0391872	0.344389
GO_DOUBLE_STRANDED_DNA_BINDING	0.344909	0.0151324	0.345439
GO_REGULATION_OF_MAPK_CASCADE	0.334876	0.00839329	0.346266
GO_CELL_MORPHOGENESIS_INVOLVED_IN_NEURON_DIFFERENTIATION	0.376	0.0149051	0.346821
GO_CELL_PART_MORPHOGENESIS	0.361075	0.03125	0.362737
GO_CALCIUM_ION_BINDING	0.37719	0.0311284	0.36666
GO_PHOSPHATIDYLINOSITOL_3_KINASE_SIGNALING	0.476791	0.0614934	0.374816
GO_RESPONSE_TO_NUTRIENT	0.451968	0.04329	0.37696
GO_CELLULAR_RESPONSE_TO_NITROGEN_COMPOUND	0.323764	0.0237797	0.379261
GO_REGULATION_OF_RNA_SPLICING	0.436035	0.0544629	0.379787
GO_PROTEIN_COMPLEX_OLIGOMERIZATION	0.380503	0.0368852	0.380435
GO_MODIFICATION_OF_MORPHOLOGY_OR_PHYSIOLOGY_OF_OTHER_ORGANISM_INVOLVED_IN_SYMBIOTIC_INTERACTION	0.492772	0.0474074	0.380609
GO_CELLULAR_COMPONENT_MORPHOGENESIS	0.313376	0.0271868	0.380838
GO_INTERACTION_WITH_SYMBIONT	0.490901	0.0510046	0.38084
GO_CELLULAR_RESPONSE_TO_DRUG	0.34904	0.0431373	0.381285
GO_TRANSCRIPTION_FACTOR_BINDING	0.351727	0.0391645	0.381964
GO_PLATELET_DEGRANULATION	0.410418	0.0515759	0.382984
GO_RESPONSE_TO_BACTERIUM	0.315693	0.0272512	0.384942
GO_NUCLEAR_CHROMOSOME	0.335058	0.0206813	0.387062
GO_MYELOID_LEUKOCYTE_DIFFERENTIATION	0.378373	0.0483222	0.387277
GO_REGULATION_OF_GTPASE_ACTIVITY	0.373987	0.0502035	0.387657
GO_REGULATION_OF_CELL_POPULATION_PROLIFERATION	0.292224	0.00886918	0.3877
GO_CELL_MORPHOGENESIS_INVOLVED_IN_DIFFERENTIATION	0.343249	0.0318725	0.387904
GO_RNA_POLYMERASE_II_SPECIFIC_DNA_BINDING_TRANSCRIPTION_FACTOR_BINDING	0.414702	0.0617284	0.388112
GO_REGULATION_OF_CELL_SHAPE	0.425574	0.0578871	0.388599
GO_RESPONSE_TO_CARBOHYDRATE	0.445837	0.0530086	0.388939
GO_REGULATION_OF_LEUKOCYTE_CHEMOTAXIS	0.429906	0.0654339	0.390559
GO_CELLULAR_RESPONSE_TO_OXYGEN_CONTAINING_COMPOUND	0.294868	0.023068	0.391179
GO_LEUKOCYTE_DIFFERENTIATION	0.315061	0.0254854	0.39137
GO_IMMUNE_SYSTEM_DEVELOPMENT	0.289351	0.024362	0.392048
GO_SEQUENCE_SPECIFIC_DOUBLE_STRANDED_DNA_BINDING	0.336876	0.0359897	0.392313
GO_MESENCHYME_DEVELOPMENT	0.403362	0.0602582	0.392587
GO_SEQUENCE_SPECIFIC_DNA_BINDING	0.323222	0.0381773	0.393158
GO_REGULATION_OF_DNA_TEMPLATED_TRANSCRIPTION_IN_RESPONSE_TO_STRESS	0.420555	0.0609065	0.393424
GO_REGULATION_OF_PHOSPHORYLATION	0.287323	0.0245536	0.393862
GO_CARDIOVASCULAR_SYSTEM_DEVELOPMENT	0.320798	0.0366748	0.394749
GO_CHROMOSOME_SEGREGATION	0.464902	0.0708899	0.394998
GO_MODIFICATION_OF_MORPHOLOGY_OR_PHYSIOLOGY_OF_OTHER_ORGANISM	0.452218	0.0675477	0.395008
GO_MESENCHYMAL_CELL_DIFFERENTIATION	0.416759	0.0674663	0.395577
GO_EXOCYTOSIS	0.288496	0.0145414	0.395756
GO_NEGATIVE_REGULATION_OF_CELL_CYCLE_PHASE_TRANSITION	0.408446	0.0637394	0.396086
GO_HUMORAL_IMMUNE_RESPONSE	0.405284	0.0573529	0.397514
GO_REGULATION_OF_ANATOMICAL_STRUCTURE_MORPHOGENESIS	0.297065	0.0175234	0.398314
GO_POSITIVE_REGULATION_OF_CELL_DIFFERENTIATION	0.301961	0.0247934	0.398647
GO_POSITIVE_REGULATION_OF_DEVELOPMENTAL_PROCESS	0.28706	0.0202247	0.398968
GO_MYELOID_CELL_DIFFERENTIATION	0.328187	0.0519645	0.40539
GO_PROTEIN_HOMOOLIGOMERIZATION	0.438034	0.0566319	0.409567
GO_POSITIVE_REGULATION_OF_MAPK_CASCADE	0.319521	0.0411985	0.418402
GO_MAINTENANCE_OF_CELL_NUMBER	0.445957	0.0833333	0.419415
GO_POSITIVE_REGULATION_OF_PHAGOCYTOSIS	0.419274	0.0745614	0.420999
GO_DNA_BINDING_TRANSCRIPTION_FACTOR_BINDING	0.379965	0.066482	0.42113
GO_DIVALENT_INORGANIC_CATION_TRANSPORT	0.355009	0.0614754	0.421548
GO_SPINDLE	0.399551	0.0759494	0.422008
GO_TAXIS	0.3051	0.0516373	0.42248
GO_REGULATION_OF_EXOCYTOSIS	0.391957	0.0728083	0.422686
GO_TEMPERATURE_HOMEOSTASIS	0.429153	0.0885886	0.424673
GO_INTRINSIC_APOPTOTIC_SIGNALING_PATHWAY	0.36375	0.0658602	0.42698
GO_REGULATION_OF_CELL_MORPHOGENESIS_INVOLVED_IN_DIFFERENTIATION	0.399703	0.0819209	0.429462
GO_REGULATION_OF_CHEMOTAXIS	0.36206	0.0751678	0.433011
GO_VIRAL_LIFE_CYCLE	0.341665	0.0647668	0.433242
GO_RECEPTOR_MEDIATED_ENDOCYTOSIS	0.356854	0.0658602	0.434366
GO_MEMBRANE_REGION	0.343414	0.0721649	0.43618
GO_RESPONSE_TO_PEPTIDE	0.32333	0.0580808	0.444139
GO_CELLULAR_RESPONSE_TO_PEPTIDE	0.336534	0.0682415	0.446091
GO_POSITIVE_REGULATION_OF_RNA_METABOLIC_PROCESS	0.277008	0.0412371	0.446134
GO_REGULATION_OF_LEUKOCYTE_MIGRATION	0.346899	0.0711354	0.446258
GO_B_CELL_DIFFERENTIATION	0.415924	0.0973202	0.44693
GO_BLOOD_VESSEL_MORPHOGENESIS	0.314402	0.0470297	0.447848
GO_CIS_REGULATORY_REGION_BINDING	0.333	0.0681818	0.448206
GO_CHROMATIN_BINDING	0.354895	0.0745257	0.448265
GO_RESPONSE_TO_REACTIVE_OXYGEN_SPECIES	0.378575	0.090411	0.448894
GO_DEFENSE_RESPONSE_TO_BACTERIUM	0.383867	0.0863309	0.448941
GO_DEVELOPMENTAL_GROWTH	0.32046	0.0667506	0.449801
GO_NEGATIVE_REGULATION_OF_PEPTIDASE_ACTIVITY	0.394604	0.11236	0.450536
GO_ANATOMICAL_STRUCTURE_FORMATION_INVOLVED_IN_MORPHOGENESIS	0.294936	0.0513419	0.45064
GO_TRANSMEMBRANE_RECEPTOR_PROTEIN_TYROSINE_KINASE_SIGNALING_PATHWAY	0.311919	0.0533333	0.450994
GO_TRANSCRIPTION_REGULATOR_ACTIVITY	0.296137	0.0508876	0.45278
GO_REGULATION_OF_CELL_ADHESION	0.29594	0.0624264	0.453144
GO_NEGATIVE_REGULATION_OF_DNA_BINDING_TRANSCRIPTION_FACTOR_ACTIVITY	0.430956	0.0869565	0.4532
GO_CONNECTIVE_TISSUE_DEVELOPMENT	0.414586	0.0875371	0.453446
GO_CELLULAR_RESPONSE_TO_BIOTIC_STIMULUS	0.334859	0.0820312	0.45551
GO_NEGATIVE_REGULATION_OF_TRANSCRIPTION_BY_RNA_POLYMERASE_II	0.307103	0.0766332	0.464721
GO_CELL_LEADING_EDGE	0.335178	0.0942126	0.465417
GO_CELLULAR_RESPONSE_TO_CHEMICAL_STRESS	0.349037	0.0763052	0.467423
GO_NON_CANONICAL_WNT_SIGNALING_PATHWAY	0.426269	0.104956	0.467958
GO_ENDOCYTOSIS	0.303326	0.064557	0.468231
GO_ENDOPLASMIC_RETICULUM_UNFOLDED_PROTEIN_RESPONSE	0.417916	0.106017	0.472408
GO_NEGATIVE_REGULATION_OF_MITOTIC_CELL_CYCLE	0.3735	0.113445	0.473042
GO_RESPONSE_TO_ANTIBIOTIC	0.341615	0.0821918	0.474111
GO_REGULATION_OF_VASCULATURE_DEVELOPMENT	0.345032	0.0763889	0.474743
GO_MYELOID_CELL_HOMEOSTASIS	0.385646	0.113997	0.476465
GO_KINASE_BINDING	0.299417	0.0807601	0.477183
GO_SIGNAL_TRANSDUCTION_BY_PROTEIN_PHOSPHORYLATION	0.278714	0.0654206	0.478078
GO_REGULATION_OF_VESICLE_MEDIATED_TRANSPORT	0.306281	0.0789474	0.478217
GO_UBIQUITIN_LIKE_PROTEIN_LIGASE_BINDING	0.344624	0.0995962	0.478414
GO_G_PROTEIN_COUPLED_RECEPTOR_SIGNALING_PATHWAY	0.314526	0.0735484	0.478418
GO_EPITHELIUM_DEVELOPMENT	0.289428	0.0601415	0.480047
GO_CELLULAR_RESPONSE_TO_LIPID	0.301234	0.0805861	0.480293
GO_FC_RECEPTOR_MEDIATED_STIMULATORY_SIGNALING_PATHWAY	0.402556	0.127466	0.484154
GO_GENE_SILENCING_BY_RNA	0.440601	0.113565	0.484657
GO_CELLULAR_RESPONSE_TO_EXTRACELLULAR_STIMULUS	0.362678	0.122616	0.486599
GO_REGULATION_OF_MUSCLE_SYSTEM_PROCESS	0.381032	0.116348	0.486687
GO_REGULATION_OF_PLASMA_LIPOPROTEIN_PARTICLE_LEVELS	0.416481	0.128358	0.487051
GO_PROTEIN_PHOSPHORYLATION	0.256581	0.0441989	0.487212
GO_CYTOKINE_METABOLIC_PROCESS	0.396724	0.0967283	0.487213
GO_CELL_CELL_JUNCTION	0.353236	0.114555	0.489532
GO_REGULATION_OF_PHOSPHORUS_METABOLIC_PROCESS	0.263473	0.0478842	0.489883
GO_CELL_PROJECTION_ORGANIZATION	0.283647	0.0730271	0.491941
GO_NEGATIVE_REGULATION_OF_IMMUNE_SYSTEM_PROCESS	0.304255	0.081381	0.495
GO_RESPONSE_TO_STEROID_HORMONE	0.336238	0.121212	0.53512
GO_EPITHELIAL_CELL_PROLIFERATION	0.330786	0.119835	0.536123
GO_REGULATION_OF_REGULATED_SECRETORY_PATHWAY	0.437348	0.138414	0.537757
GO_REGULATION_OF_IMMUNE_SYSTEM_PROCESS	0.249695	0.0555556	0.542679
GO_LYMPHOCYTE_ACTIVATION	0.274465	0.095858	0.542877
GO_RESPONSE_TO_INSULIN	0.371686	0.122093	0.543837
GO_REGULATION_OF_PROTEIN_MODIFICATION_PROCESS	0.254494	0.0552546	0.545268
GO_REGULATION_OF_SYMBIOSIS_ENCOMPASSING_MUTUALISM_THROUGH_PARASITISM	0.344408	0.121751	0.550129
GO_HEAD_DEVELOPMENT	0.306505	0.112137	0.552341
GO_REGULATION_OF_TRANSPORTER_ACTIVITY	0.375852	0.138929	0.552569
GO_ENTRY_INTO_HOST	0.370757	0.133721	0.552916
GO_REGULATION_OF_MRNA_METABOLIC_PROCESS	0.309288	0.13308	0.55426
GO_NEGATIVE_REGULATION_OF_CELL_CYCLE_PROCESS	0.350039	0.134454	0.554365
GO_POSITIVE_REGULATION_OF_PHOSPHORUS_METABOLIC_PROCESS	0.265474	0.0710128	0.554465
GO_TUBE_MORPHOGENESIS	0.279241	0.10107	0.556101
GO_REGULATION_OF_PHOSPHATIDYLINOSITOL_3_KINASE_SIGNALING	0.428703	0.151608	0.556324
GO_RESPONSE_TO_LIPID	0.263917	0.0891204	0.562451
GO_MOLECULAR_FUNCTION_REGULATOR	0.252643	0.0878378	0.563638
GO_PLACENTA_DEVELOPMENT	0.417313	0.145038	0.56584
GO_POSITIVE_REGULATION_OF_INFLAMMATORY_RESPONSE	0.384084	0.153401	0.566925
GO_POSITIVE_REGULATION_OF_CELL_POPULATION_PROLIFERATION	0.26779	0.108619	0.56707
GO_CELLULAR_RESPONSE_TO_ENDOGENOUS_STIMULUS	0.255074	0.0758929	0.567832
GO_CELLULAR_RESPONSE_TO_TOPOLOGICALLY_INCORRECT_PROTEIN	0.376663	0.14978	0.568076
GO_CELLULAR_RESPONSE_TO_INORGANIC_SUBSTANCE	0.360965	0.129834	0.568118
GO_POSITIVE_REGULATION_OF_IMMUNE_SYSTEM_PROCESS	0.251685	0.0738255	0.571973
GO_RESPONSE_TO_LIGHT_STIMULUS	0.367779	0.152857	0.572835
GO_NEGATIVE_REGULATION_OF_ORGANELLE_ORGANIZATION	0.337098	0.159944	0.573201
GO_COAGULATION	0.326491	0.138522	0.574141
GO_RESPONSE_TO_OXIDATIVE_STRESS	0.301171	0.145098	0.574397
GO_GROWTH	0.270347	0.101942	0.576536
GO_NEGATIVE_REGULATION_OF_DEVELOPMENTAL_PROCESS	0.271602	0.107317	0.576735
GO_POSITIVE_REGULATION_OF_CELLULAR_BIOSYNTHETIC_PROCESS	0.248197	0.0845225	0.578108
GO_ORGANIC_HYDROXY_COMPOUND_TRANSPORT	0.401763	0.161435	0.578446
GO_POSITIVE_REGULATION_OF_TUMOR_NECROSIS_FACTOR_SUPERFAMILY_CYTOKINE_PRODUCTION	0.366876	0.180882	0.578981
GO_PERINUCLEAR_REGION_OF_CYTOPLASM	0.293291	0.124533	0.579195
GO_RESPONSE_TO_MOLECULE_OF_BACTERIAL_ORIGIN	0.282463	0.156764	0.579641
GO_GLAND_MORPHOGENESIS	0.40042	0.160938	0.58021
GO_CENTRAL_NERVOUS_SYSTEM_DEVELOPMENT	0.278484	0.136531	0.580564
GO_CELL_CELL_SIGNALING_BY_WNT	0.304546	0.139535	0.581043
GO_CADHERIN_BINDING	0.28615	0.162733	0.581653
GO_POSITIVE_REGULATION_OF_CELL_ADHESION	0.301252	0.136541	0.582095
GO_TRANSCRIPTION_FACTOR_COMPLEX	0.348015	0.189944	0.582115
GO_GENE_SILENCING	0.376862	0.202329	0.582201
GO_RESPONSE_TO_ABIOTIC_STIMULUS	0.247354	0.136259	0.582571
GO_CELL_SURFACE_RECEPTOR_SIGNALING_PATHWAY_INVOLVED_IN_CELL_CELL_SIGNALING	0.298725	0.138853	0.582923
GO_POSITIVE_REGULATION_OF_NUCLEOBASE_CONTAINING_COMPOUND_METABOLIC_PROCESS	0.246613	0.12036	0.583413
GO_REGULATION_OF_INTRACELLULAR_SIGNAL_TRANSDUCTION	0.235886	0.104213	0.583595
GO_EXTRINSIC_COMPONENT_OF_MEMBRANE	0.360397	0.182961	0.583803
GO_MUSCLE_CELL_PROLIFERATION	0.348062	0.174451	0.584155
GO_ERYTHROCYTE_HOMEOSTASIS	0.371592	0.207965	0.584422
GO_SECRETION	0.231961	0.110867	0.584647
GO_RESPONSE_TO_PEPTIDE_HORMONE	0.316525	0.161549	0.584689
GO_CYTOSOLIC_TRANSPORT	0.406714	0.196923	0.585498
GO_ION_TRANSPORT	0.259392	0.133877	0.585637
GO_REGULATION_OF_MRNA_PROCESSING	0.394303	0.192931	0.58575
GO_RESPONSE_TO_ENDOPLASMIC_RETICULUM_STRESS	0.317938	0.168675	0.585878
GO_REGULATION_OF_MYELOID_CELL_DIFFERENTIATION	0.318043	0.18608	0.585997
GO_REGULATION_OF_PHAGOCYTOSIS	0.345015	0.154161	0.586047
GO_RESPONSE_TO_OXYGEN_CONTAINING_COMPOUND	0.246553	0.0993378	0.586729
GO_ENDOSOMAL_TRANSPORT	0.365943	0.188022	0.587358
GO_RECEPTOR_SIGNALING_PATHWAY_VIA_STAT	0.404689	0.174579	0.587594
GO_POSITIVE_REGULATION_OF_INTRACELLULAR_SIGNAL_TRANSDUCTION	0.252916	0.12093	0.587636
GO_NEGATIVE_REGULATION_OF_BIOSYNTHETIC_PROCESS	0.247302	0.13544	0.587868
GO_PHOSPHORIC_ESTER_HYDROLASE_ACTIVITY	0.329721	0.184931	0.587877
GO_REGULATION_OF_HEMOPOIESIS	0.281606	0.152585	0.58814
GO_REGULATION_OF_LEUKOCYTE_DIFFERENTIATION	0.30299	0.159631	0.588283
GO_NUCLEAR_TRANSCRIPTION_FACTOR_COMPLEX	0.388994	0.186667	0.588944
GO_TUBE_DEVELOPMENT	0.257082	0.139151	0.589352
GO_RNA_SPLICING_VIA_TRANSESTERIFICATION_REACTIONS	0.305814	0.174966	0.590174
GO_REGULATION_OF_DEVELOPMENTAL_GROWTH	0.328527	0.168707	0.59042
GO_IMPORT_INTO_CELL	0.272974	0.138614	0.591084
GO_IN_UTERO_EMBRYONIC_DEVELOPMENT	0.328634	0.183646	0.591094
GO_RESPONSE_TO_NITROGEN_COMPOUND	0.250265	0.122847	0.591483
GO_NEURON_DIFFERENTIATION	0.261797	0.134146	0.591671
GO_HEPATICOBILIARY_SYSTEM_DEVELOPMENT	0.404691	0.174046	0.592229
GO_RESPONSE_TO_HORMONE	0.266267	0.153664	0.592413
GO_INTRINSIC_APOPTOTIC_SIGNALING_PATHWAY_IN_RESPONSE_TO_DNA_DAMAGE	0.399716	0.193548	0.592557
GO_CELL_CELL_ADHESION	0.263984	0.168734	0.592571
GO_NUCLEAR_SPECK	0.31571	0.160784	0.59258
GO_RESPONSE_TO_WOUNDING	0.267083	0.155767	0.593017
GO_REGULATION_OF_CELL_CELL_ADHESION	0.28825	0.159948	0.593286
GO_NEURON_DEVELOPMENT	0.270813	0.126708	0.593495
GO_LYMPHOCYTE_DIFFERENTIATION	0.286455	0.161708	0.594083
GO_REGULATION_OF_GROWTH	0.27722	0.175592	0.597174
GO_SMALL_MOLECULE_BIOSYNTHETIC_PROCESS	0.300557	0.200538	0.597883
GO_KINASE_REGULATOR_ACTIVITY	0.357479	0.220859	0.597884
GO_PROTEIN_LOCALIZATION_TO_PLASMA_MEMBRANE	0.321626	0.206434	0.598435
GO_RESPONSE_TO_INTERLEUKIN_12	0.372233	0.216216	0.598473
GO_NEGATIVE_REGULATION_OF_NEURON_DEATH	0.353159	0.208274	0.598492
GO_POSITIVE_REGULATION_OF_PROTEIN_METABOLIC_PROCESS	0.236225	0.138462	0.598512
GO_EXTRINSIC_COMPONENT_OF_PLASMA_MEMBRANE	0.386135	0.199422	0.598613
GO_RESPONSE_TO_MECHANICAL_STIMULUS	0.354121	0.218023	0.598886
GO_MRNA_BINDING	0.304175	0.205922	0.603867
GO_PROTEIN_KINASE_B_SIGNALING	0.350826	0.200288	0.604833
GO_T_CELL_ACTIVATION	0.275588	0.183623	0.604975
GO_RESPONSE_TO_TOPOLOGICALLY_INCORRECT_PROTEIN	0.333639	0.20438	0.605196
GO_CELLULAR_RESPONSE_TO_EXTERNAL_STIMULUS	0.305169	0.208054	0.606815
GO_POSITIVE_REGULATION_OF_PROTEIN_MODIFICATION_PROCESS	0.245767	0.162928	0.606938
GO_CYTOKINE_PRODUCTION	0.246363	0.165501	0.609133
GO_PRODUCTION_OF_MOLECULAR_MEDIATOR_OF_IMMUNE_RESPONSE	0.343243	0.221127	0.61039
GO_CELL_CELL_SIGNALING	0.238452	0.158076	0.611586
GO_CHROMOSOMAL_REGION	0.342406	0.205926	0.6119
GO_IMMUNE_EFFECTOR_PROCESS	0.227946	0.138547	0.612474
GO_REGULATORY_REGION_NUCLEIC_ACID_BINDING	0.265205	0.17764	0.61271
GO_REGULATION_OF_GENE_EXPRESSION_EPIGENETIC	0.334821	0.210072	0.615033
GO_RNA_SPLICING	0.283668	0.201282	0.615546
GO_MUSCLE_TISSUE_DEVELOPMENT	0.341869	0.215714	0.615986
GO_REGULATION_OF_NEURON_DIFFERENTIATION	0.290978	0.184994	0.616188
GO_CELLULAR_RESPONSE_TO_TOXIC_SUBSTANCE	0.312378	0.207672	0.616953
GO_ESTABLISHMENT_OF_RNA_LOCALIZATION	0.386852	0.235119	0.618209
GO_FC_RECEPTOR_SIGNALING_PATHWAY	0.313528	0.205843	0.61949
GO_DIVALENT_INORGANIC_CATION_HOMEOSTASIS	0.289964	0.214941	0.6199
GO_TUMOR_NECROSIS_FACTOR_SUPERFAMILY_CYTOKINE_PRODUCTION	0.301319	0.226594	0.620214
GO_REGULATION_OF_CELL_PROJECTION_ORGANIZATION	0.281654	0.224704	0.620278
GO_MRNA_PROCESSING	0.283156	0.20797	0.62055
GO_REGENERATION	0.329109	0.22446	0.620632
GO_REGULATION_OF_RESPONSE_TO_CYTOKINE_STIMULUS	0.336862	0.227273	0.621202
GO_CELLULAR_RESPONSE_TO_INSULIN_STIMULUS	0.339557	0.22061	0.621241
GO_RESPONSE_TO_ENDOGENOUS_STIMULUS	0.229442	0.143488	0.621744
GO_POSITIVE_REGULATION_OF_EPITHELIAL_CELL_PROLIFERATION	0.343776	0.250712	0.621808
GO_NEGATIVE_REGULATION_OF_RNA_BIOSYNTHETIC_PROCESS	0.248125	0.190591	0.622641
GO_ENDOSOME_MEMBRANE	0.283028	0.205163	0.624071
GO_PRIMARY_ACTIVE_TRANSMEMBRANE_TRANSPORTER_ACTIVITY	0.379615	0.224771	0.624909
GO_PROTEIN_AUTOPHOSPHORYLATION	0.362185	0.234443	0.628105
GO_CELLULAR_HOMEOSTASIS	0.248891	0.210464	0.636524
GO_BLOOD_MICROPARTICLE	0.36946	0.25731	0.637947
GO_CELLULAR_RESPONSE_TO_REACTIVE_OXYGEN_SPECIES	0.360206	0.249633	0.638732
GO_HOMEOSTATIC_PROCESS	0.224875	0.188326	0.639517
GO_REGULATION_OF_MYELOID_LEUKOCYTE_DIFFERENTIATION	0.344097	0.255747	0.640402
GO_NEGATIVE_REGULATION_OF_NUCLEOBASE_CONTAINING_COMPOUND_METABOLIC_PROCESS	0.238702	0.186499	0.640491
GO_RESPONSE_TO_EXTRACELLULAR_STIMULUS	0.282743	0.203252	0.641212
GO_REGULATION_OF_CARBOHYDRATE_METABOLIC_PROCESS	0.366654	0.238095	0.64124
GO_IMMUNE_RESPONSE_REGULATING_CELL_SURFACE_RECEPTOR_SIGNALING_PATHWAY	0.27963	0.240473	0.641416
GO_POSITIVE_REGULATION_OF_LEUKOCYTE_MIGRATION	0.309186	0.247899	0.641431
GO_ACTIVATION_OF_IMMUNE_RESPONSE	0.250383	0.227047	0.64185
GO_INTERACTION_WITH_HOST	0.297545	0.245232	0.642092
GO_OSTEOCLAST_DIFFERENTIATION	0.364921	0.275542	0.642425
GO_RESPONSE_TO_TOXIC_SUBSTANCE	0.263771	0.224747	0.642815
GO_ZINC_ION_BINDING	0.283001	0.254282	0.642833
GO_SPECIFIC_GRANULE_MEMBRANE	0.353924	0.280116	0.643723
GO_NEGATIVE_REGULATION_OF_SIGNALING	0.229785	0.221591	0.643765
GO_ENZYME_LINKED_RECEPTOR_PROTEIN_SIGNALING_PATHWAY	0.23824	0.205714	0.644048
GO_BIOLOGICAL_ADHESION	0.231965	0.201824	0.644502
GO_VESICLE_ORGANIZATION	0.296837	0.25779	0.644759
GO_LIPOPOLYSACCHARIDE_MEDIATED_SIGNALING_PATHWAY	0.35418	0.275862	0.645062
GO_NEGATIVE_REGULATION_OF_MULTICELLULAR_ORGANISMAL_PROCESS	0.232594	0.237327	0.645303
GO_ENDOPEPTIDASE_REGULATOR_ACTIVITY	0.374162	0.266154	0.645358
GO_POSITIVE_REGULATION_OF_CELLULAR_AMIDE_METABOLIC_PROCESS	0.327755	0.263158	0.645467
GO_NEGATIVE_REGULATION_OF_RESPONSE_TO_EXTERNAL_STIMULUS	0.281755	0.244565	0.645749
GO_LEUKOCYTE_CELL_CELL_ADHESION	0.279771	0.239159	0.645986
GO_REGULATION_OF_OSSIFICATION	0.320199	0.256046	0.646096
GO_IMMUNE_RESPONSE_REGULATING_SIGNALING_PATHWAY	0.247101	0.235294	0.646304
GO_RNA_LOCALIZATION	0.357406	0.273792	0.646541
GO_MEMBRANE_ORGANIZATION	0.243931	0.217446	0.646849
GO_REGULATION_OF_CELL_CYCLE_PHASE_TRANSITION	0.287729	0.253351	0.646984
GO_POSTTRANSCRIPTIONAL_REGULATION_OF_GENE_EXPRESSION	0.250777	0.253416	0.647041
GO_NEGATIVE_REGULATION_OF_HEMOPOIESIS	0.349125	0.250366	0.647212
GO_AMIDE_BINDING	0.318508	0.275862	0.647237
GO_SMOOTH_MUSCLE_CELL_PROLIFERATION	0.348955	0.281938	0.647407
GO_CYTOKINESIS	0.3606	0.289355	0.648015
GO_PROTEIN_LOCALIZATION_TO_CELL_PERIPHERY	0.302616	0.239071	0.648071
GO_NUCLEAR_BODY	0.271779	0.266667	0.648203
GO_CELL_MOTILITY	0.222063	0.221239	0.648298
GO_REGULATION_OF_NEURON_PROJECTION_DEVELOPMENT	0.280383	0.268	0.64874
GO_VESICLE_LUMEN	0.266382	0.257516	0.649047
GO_NEGATIVE_REGULATION_OF_PHOSPHORYLATION	0.273954	0.237288	0.649054
GO_NEGATIVE_REGULATION_OF_IMMUNE_EFFECTOR_PROCESS	0.341064	0.263081	0.649293
GO_NEGATIVE_REGULATION_OF_MOLECULAR_FUNCTION	0.236233	0.242215	0.649536
GO_MUSCLE_STRUCTURE_DEVELOPMENT	0.271009	0.236092	0.649819
GO_ENDOPLASMIC_RETICULUM_LUMEN	0.305447	0.255061	0.649977
GO_POSITIVE_REGULATION_OF_REACTIVE_OXYGEN_SPECIES_METABOLIC_PROCESS	0.352141	0.265217	0.650227
GO_REGULATION_OF_ORGANELLE_ASSEMBLY	0.354739	0.290749	0.650946
GO_REGULATION_OF_CELLULAR_RESPONSE_TO_STRESS	0.248662	0.247561	0.65243
GO_CELL_ACTIVATION	0.214891	0.203226	0.652817
GO_REGULATION_OF_LYMPHOCYTE_ACTIVATION	0.257038	0.291074	0.660051
GO_CELLULAR_RESPONSE_TO_ABIOTIC_STIMULUS	0.304651	0.276389	0.660874
GO_HOMEOSTASIS_OF_NUMBER_OF_CELLS	0.281494	0.278003	0.661093
GO_CORTICAL_CYTOSKELETON	0.347698	0.297654	0.661499
GO_REGULATION_OF_DEFENSE_RESPONSE	0.228793	0.239857	0.661805
GO_REGULATION_OF_CELL_SUBSTRATE_ADHESION	0.316498	0.282548	0.662109
GO_REGULATION_OF_MRNA_SPLICING_VIA_SPLICEOSOME	0.362893	0.30229	0.66214
GO_STRESS_ACTIVATED_PROTEIN_KINASE_SIGNALING_CASCADE	0.280998	0.288	0.662437
GO_REGULATION_OF_ACTIN_FILAMENT_ORGANIZATION	0.286753	0.278447	0.663326
GO_TERTIARY_GRANULE_MEMBRANE	0.362416	0.286337	0.664012
GO_RIBONUCLEOPROTEIN_GRANULE	0.296722	0.287858	0.664036
GO_REGULATION_OF_ACTIN_FILAMENT_BASED_PROCESS	0.275008	0.295337	0.664135
GO_CELL	0.230573	0.241255	0.664418
GO_TRANSITION_METAL_ION_BINDING	0.255891	0.281095	0.667948
GO_WHOLE_MEMBRANE	0.212033	0.23301	0.668168
GO_POSITIVE_REGULATION_OF_TRANSLATION	0.336247	0.29941	0.669467
GO_NEGATIVE_REGULATION_OF_CELL_POPULATION_PROLIFERATION	0.255057	0.28169	0.669853
GO_CALCIUM_ION_TRANSMEMBRANE_TRANSPORT	0.321118	0.299133	0.670654
GO_REGULATION_OF_CALCIUM_ION_TRANSPORT	0.317163	0.320621	0.671533
GO_MULTICELLULAR_ORGANISMAL_HOMEOSTASIS	0.279704	0.303112	0.671578
GO_MUSCLE_ORGAN_DEVELOPMENT	0.311547	0.296671	0.672355
GO_NEGATIVE_REGULATION_OF_RESPONSE_TO_STIMULUS	0.216234	0.257238	0.673339
GO_POSITIVE_REGULATION_OF_LEUKOCYTE_CHEMOTAXIS	0.328717	0.323741	0.673882
GO_REGULATION_OF_RESPONSE_TO_STRESS	0.213659	0.243032	0.674019
GO_PROTEIN_DOMAIN_SPECIFIC_BINDING	0.246798	0.284277	0.675454
GO_HORMONE_RECEPTOR_BINDING	0.361106	0.31194	0.684363
GO_PROTEIN_HOMODIMERIZATION_ACTIVITY	0.242251	0.29397	0.687649
GO_CELLULAR_RESPONSE_TO_HORMONE_STIMULUS	0.246661	0.285528	0.688151
GO_LOCOMOTION	0.20675	0.275299	0.688302
GO_ORGANELLE_SUBCOMPARTMENT	0.314442	0.297258	0.689203
GO_REGULATION_OF_HYDROLASE_ACTIVITY	0.220438	0.299065	0.690543
GO_TRANSPORTER_ACTIVITY	0.263794	0.301987	0.691072
GO_NEUROGENESIS	0.216875	0.309028	0.691278
GO_NEGATIVE_REGULATION_OF_NEURON_APOPTOTIC_PROCESS	0.32194	0.336245	0.691363
GO_TOLL_LIKE_RECEPTOR_SIGNALING_PATHWAY	0.28349	0.338483	0.691594
GO_REGULATION_OF_KINASE_ACTIVITY	0.22985	0.318293	0.691614
GO_IDENTICAL_PROTEIN_BINDING	0.212023	0.323232	0.691629
GO_POSITIVE_REGULATION_OF_MULTICELLULAR_ORGANISMAL_PROCESS	0.206313	0.313836	0.691694
GO_POSITIVE_REGULATION_OF_MYELOID_CELL_DIFFERENTIATION	0.311298	0.342898	0.691755
GO_HEART_PROCESS	0.356085	0.346386	0.692024
GO_PROTEIN_IMPORT	0.33083	0.351551	0.692689
GO_REGULATION_OF_BODY_FLUID_LEVELS	0.254056	0.338196	0.692744
GO_POSITIVE_REGULATION_OF_DEFENSE_RESPONSE	0.24181	0.311436	0.692855
GO_DNA_RECOMBINATION	0.350378	0.374422	0.693037
GO_REGULATION_OF_MULTI_ORGANISM_PROCESS	0.224519	0.305523	0.693187
GO_CONTRACTILE_FIBER	0.348429	0.317841	0.69323
GO_CELLULAR_RESPONSE_TO_DNA_DAMAGE_STIMULUS	0.236309	0.328801	0.693868
GO_REGULATION_OF_PEPTIDYL_TYROSINE_PHOSPHORYLATION	0.308149	0.328652	0.69396
GO_SECRETORY_VESICLE	0.216673	0.288813	0.693989
GO_POSITIVE_REGULATION_OF_CELLULAR_COMPONENT_ORGANIZATION	0.222929	0.300926	0.694063
GO_REGULATION_OF_CELL_CYCLE_G1_S_PHASE_TRANSITION	0.347337	0.31825	0.694117
GO_ION_TRANSMEMBRANE_TRANSPORT	0.243065	0.292232	0.694119
GO_PROTEIN_DEPHOSPHORYLATION	0.270575	0.336436	0.694137
GO_OSTEOBLAST_DIFFERENTIATION	0.329053	0.331797	0.694445
GO_NEURON_DEATH	0.266792	0.318182	0.694508
GO_PIGMENT_GRANULE	0.299369	0.311453	0.694601
GO_SECRETORY_GRANULE	0.216563	0.296591	0.694624
GO_EMBRYO_DEVELOPMENT_ENDING_IN_BIRTH_OR_EGG_HATCHING	0.263517	0.321716	0.69471
GO_REGULATION_OF_RESPONSE_TO_EXTERNAL_STIMULUS	0.214395	0.2932	0.695153
GO_MORPHOGENESIS_OF_A_POLARIZED_EPITHELIUM	0.353847	0.342988	0.695316
GO_CELLULAR_RESPONSE_TO_PEPTIDE_HORMONE_STIMULUS	0.282189	0.328691	0.69533
GO_RESPONSE_TO_RADIATION	0.273578	0.309463	0.695378
GO_ENZYME_INHIBITOR_ACTIVITY	0.268398	0.331135	0.695462
GO_GLAND_DEVELOPMENT	0.258778	0.336021	0.695709
GO_METAL_ION_TRANSPORT	0.243532	0.326781	0.69595
GO_RUFFLE	0.31255	0.33037	0.696034
GO_NEGATIVE_REGULATION_OF_PROTEOLYSIS	0.291342	0.334266	0.696232
GO_REGULATION_OF_CELL_DEATH	0.205194	0.339623	0.696396
GO_REGULATION_OF_CELL_CYCLE	0.222165	0.330498	0.696508
GO_HEART_MORPHOGENESIS	0.334515	0.351032	0.69691
GO_GROWTH_FACTOR_BINDING	0.33139	0.349014	0.697071
GO_REGULATION_OF_MUSCLE_CELL_DIFFERENTIATION	0.341082	0.353111	0.697084
GO_FC_EPSILON_RECEPTOR_SIGNALING_PATHWAY	0.321737	0.328808	0.69712
GO_NEGATIVE_REGULATION_OF_CATALYTIC_ACTIVITY	0.231624	0.332536	0.697628
GO_PHOSPHATASE_ACTIVITY	0.304373	0.355882	0.697725
GO_REGULATION_OF_IMMUNE_EFFECTOR_PROCESS	0.24698	0.355932	0.69775
GO_REGULATION_OF_SUPRAMOLECULAR_FIBER_ORGANIZATION	0.260418	0.329829	0.698244
GO_REGULATION_OF_SYSTEM_PROCESS	0.262122	0.33871	0.702455
GO_REGULATION_OF_INFLAMMATORY_RESPONSE	0.251469	0.337194	0.703588
GO_POSITIVE_REGULATION_OF_TRANSPORT	0.211725	0.33218	0.703872
GO_REGULATION_OF_WNT_SIGNALING_PATHWAY	0.273317	0.372789	0.703943
GO_ION_HOMEOSTASIS	0.233056	0.352871	0.704073
GO_RNA_POLYMERASE_II_TRANSCRIPTION_FACTOR_COMPLEX	0.34786	0.357558	0.706697
GO_WOUND_HEALING	0.233604	0.344913	0.70676
GO_ENZYME_REGULATOR_ACTIVITY	0.217377	0.346523	0.707056
GO_POSITIVE_REGULATION_OF_WNT_SIGNALING_PATHWAY	0.314631	0.36391	0.707334
GO_POSITIVE_REGULATION_OF_CALCIUM_ION_TRANSPORT	0.330873	0.350076	0.707461
GO_ACTIN_FILAMENT_ORGANIZATION	0.252647	0.347942	0.707826
GO_REGULATION_OF_BINDING	0.254145	0.343669	0.708609
GO_CILIUM	0.314136	0.359649	0.708831
GO_TRANSMEMBRANE_TRANSPORT	0.217325	0.345324	0.710709
GO_REGULATION_OF_CELL_CYCLE_PROCESS	0.247646	0.3725	0.711382
GO_METAL_ION_HOMEOSTASIS	0.234477	0.351759	0.711432
GO_PHAGOCYTOSIS	0.245119	0.36423	0.711472
GO_POSITIVE_REGULATION_OF_CELL_DEATH	0.227371	0.351581	0.711557
GO_SUPRAMOLECULAR_FIBER_ORGANIZATION	0.238621	0.363636	0.71202
GO_REGULATION_OF_CYTOSKELETON_ORGANIZATION	0.246071	0.33583	0.712301
GO_G_PROTEIN_COUPLED_RECEPTOR_SIGNALING_PATHWAY_COUPLED_TO_CYCLIC_NUCLEOTIDE_SECOND_MESSENGER	0.329262	0.391172	0.712655
GO_POSITIVE_REGULATION_OF_CELLULAR_COMPONENT_BIOGENESIS	0.246874	0.381275	0.713092
GO_STRIATED_MUSCLE_CELL_DIFFERENTIATION	0.309241	0.381024	0.713838
GO_NOTCH_SIGNALING_PATHWAY	0.324218	0.381579	0.715194
GO_T_CELL_DIFFERENTIATION	0.264846	0.396999	0.716134
GO_POSITIVE_REGULATION_OF_HYDROLASE_ACTIVITY	0.222399	0.394928	0.717343
GO_ANCHORING_JUNCTION	0.207624	0.408115	0.717449
GO_REGULATION_OF_ANATOMICAL_STRUCTURE_SIZE	0.244718	0.380704	0.717449
GO_DEVELOPMENTAL_GROWTH_INVOLVED_IN_MORPHOGENESIS	0.309952	0.424023	0.717654
GO_NUCLEOBASE_CONTAINING_COMPOUND_TRANSPORT	0.312563	0.40416	0.717894
GO_POSITIVE_REGULATION_OF_IMMUNE_RESPONSE	0.209774	0.403913	0.718129
GO_NUCLEAR_TRANSPORT	0.269624	0.38042	0.718138
GO_INTERLEUKIN_6_PRODUCTION	0.260244	0.411683	0.718532
GO_KINASE_ACTIVITY	0.237506	0.378788	0.718664
GO_REGULATION_OF_AXONOGENESIS	0.327455	0.405605	0.718687
GO_POSITIVE_REGULATION_OF_NEURON_DEATH	0.316068	0.39697	0.718887
GO_IMPORT_INTO_NUCLEUS	0.324538	0.404255	0.718892
GO_HYDROLASE_ACTIVITY_ACTING_ON_ESTER_BONDS	0.244898	0.392076	0.718914
GO_EPITHELIAL_TO_MESENCHYMAL_TRANSITION	0.331788	0.41374	0.718947
GO_MUSCLE_SYSTEM_PROCESS	0.268635	0.405738	0.718966
GO_ION_TRANSMEMBRANE_TRANSPORTER_ACTIVITY	0.271728	0.41555	0.719363
GO_PATTERN_RECOGNITION_RECEPTOR_SIGNALING_PATHWAY	0.26894	0.408769	0.719378
GO_REPRODUCTIVE_SYSTEM_DEVELOPMENT	0.262539	0.389543	0.719624
GO_ORGAN_GROWTH	0.328643	0.407975	0.719776
GO_B_CELL_ACTIVATION	0.261522	0.371034	0.71983
GO_CELL_CYCLE	0.196191	0.416204	0.719849
GO_CELLULAR_ION_HOMEOSTASIS	0.230314	0.409262	0.719913
GO_CANONICAL_WNT_SIGNALING_PATHWAY	0.278447	0.371866	0.719992
GO_REGULATION_OF_T_CELL_ACTIVATION	0.246972	0.418883	0.720094
GO_NEGATIVE_REGULATION_OF_CYTOSKELETON_ORGANIZATION	0.31892	0.409023	0.720134
GO_CATION_TRANSPORT	0.223209	0.403593	0.72047
GO_RNA_PROCESSING	0.221029	0.397849	0.720505
GO_REGULATION_OF_CELL_ACTIVATION	0.22011	0.366422	0.720532
GO_SOMATODENDRITIC_COMPARTMENT	0.236996	0.385753	0.720549
GO_POSITIVE_REGULATION_OF_RESPONSE_TO_EXTERNAL_STIMULUS	0.21687	0.391095	0.7211
GO_NEGATIVE_REGULATION_OF_INTRACELLULAR_SIGNAL_TRANSDUCTION	0.246888	0.406623	0.721241
GO_MIDBODY	0.314544	0.435556	0.721256
GO_PEPTIDASE_REGULATOR_ACTIVITY	0.307417	0.405634	0.721344
GO_ACTIVATION_OF_INNATE_IMMUNE_RESPONSE	0.247048	0.405797	0.721362
GO_ADAPTIVE_IMMUNE_RESPONSE	0.242621	0.411154	0.721408
GO_PROTEIN_LOCALIZATION_TO_NUCLEUS	0.300162	0.404651	0.721507
GO_INTERSPECIES_INTERACTION_BETWEEN_ORGANISMS	0.200837	0.397336	0.721535
GO_POSITIVE_REGULATION_OF_CYTOKINE_BIOSYNTHETIC_PROCESS	0.32255	0.420334	0.721641
GO_REGULATION_OF_NEUROTRANSMITTER_LEVELS	0.278695	0.422727	0.721926
GO_REGULATION_OF_CELL_DEVELOPMENT	0.22208	0.381707	0.72201
GO_POSITIVE_REGULATION_OF_ION_TRANSPORT	0.27231	0.409655	0.722262
GO_SUPRAMOLECULAR_COMPLEX	0.228036	0.396614	0.722283
GO_LATE_ENDOSOME_MEMBRANE	0.332746	0.407463	0.722428
GO_CELL_CYCLE_PHASE_TRANSITION	0.237211	0.423177	0.722666
GO_CELL_BODY	0.263913	0.391946	0.723683
GO_DNA_REPLICATION	0.322349	0.397644	0.725126
GO_REGULATION_OF_RESPONSE_TO_ENDOPLASMIC_RETICULUM_STRESS	0.324482	0.427286	0.725227
GO_REGULATION_OF_LYMPHOCYTE_DIFFERENTIATION	0.286394	0.408832	0.725806
GO_PROTEIN_DIMERIZATION_ACTIVITY	0.208565	0.440197	0.72839
GO_REGULATION_OF_MRNA_CATABOLIC_PROCESS	0.264341	0.43962	0.72892
GO_MYELOID_LEUKOCYTE_MEDIATED_IMMUNITY	0.203992	0.420256	0.729023
GO_REGULATION_OF_PROTEIN_POLYMERIZATION	0.283819	0.43377	0.729265
GO_REGULATION_OF_STRESS_ACTIVATED_PROTEIN_KINASE_SIGNALING_CASCADE	0.28206	0.435574	0.729519
GO_MICROTUBULE	0.294688	0.437681	0.730363
GO_SENSORY_SYSTEM_DEVELOPMENT	0.282929	0.436232	0.730704
GO_MICROTUBULE_CYTOSKELETON	0.223897	0.432039	0.730752
GO_FOREBRAIN_DEVELOPMENT	0.284738	0.441926	0.730772
GO_OSSIFICATION	0.251509	0.442759	0.731463
GO_REGULATION_OF_IMMUNE_RESPONSE	0.196597	0.438293	0.731555
GO_NEGATIVE_REGULATION_OF_CELL_DEATH	0.205007	0.433136	0.731764
GO_NEGATIVE_REGULATION_OF_PROTEIN_METABOLIC_PROCESS	0.203185	0.428246	0.731796
GO_SUPRAMOLECULAR_POLYMER	0.240534	0.448787	0.731906
GO_POSITIVE_REGULATION_OF_BINDING	0.288775	0.442249	0.73273
GO_ACTIN_FILAMENT_BUNDLE_ORGANIZATION	0.289078	0.439199	0.733079
GO_NEGATIVE_REGULATION_OF_LOCOMOTION	0.2534	0.438172	0.733143
GO_REGULATION_OF_ACTIN_FILAMENT_BUNDLE_ASSEMBLY	0.316755	0.45303	0.733975
GO_PLATELET_ACTIVATION	0.29988	0.480282	0.734342
GO_MORPHOGENESIS_OF_AN_EPITHELIUM	0.230576	0.468912	0.734714
GO_CYTOSKELETAL_PROTEIN_BINDING	0.214957	0.447761	0.734878
GO_REACTIVE_NITROGEN_SPECIES_METABOLIC_PROCESS	0.312014	0.431644	0.734901
GO_SPECIFIC_GRANULE	0.286497	0.4375	0.735006
GO_SENSORY_ORGAN_DEVELOPMENT	0.249293	0.459864	0.73526
GO_POSITIVE_REGULATION_OF_LEUKOCYTE_DIFFERENTIATION	0.262858	0.436906	0.735286
GO_NEGATIVE_REGULATION_OF_PROTEIN_MODIFICATION_PROCESS	0.217595	0.449057	0.735421
GO_REGULATION_OF_ADAPTIVE_IMMUNE_RESPONSE	0.298184	0.457971	0.73546
GO_PEPTIDYL_TYROSINE_MODIFICATION	0.258955	0.447658	0.735498
GO_REGULATION_OF_ANIMAL_ORGAN_MORPHOGENESIS	0.272532	0.466113	0.735529
GO_RECEPTOR_METABOLIC_PROCESS	0.261213	0.452575	0.735705
GO_NEUROTRANSMITTER_METABOLIC_PROCESS	0.311853	0.463636	0.736087
GO_ORGANIC_HYDROXY_COMPOUND_METABOLIC_PROCESS	0.262222	0.452349	0.736099
GO_POST_TRANSLATIONAL_PROTEIN_MODIFICATION	0.260073	0.442308	0.736181
GO_NEGATIVE_REGULATION_OF_HYDROLASE_ACTIVITY	0.244116	0.439575	0.736239
GO_POSITIVE_REGULATION_OF_DEVELOPMENTAL_GROWTH	0.32085	0.452161	0.736239
GO_REGULATION_OF_TRANSPORT	0.187959	0.459757	0.736283
GO_CARTILAGE_DEVELOPMENT	0.31497	0.442982	0.736459
GO_NUCLEAR_ENVELOPE	0.262331	0.481224	0.740392
GO_TUMOR_NECROSIS_FACTOR_MEDIATED_SIGNALING_PATHWAY	0.286723	0.449275	0.740721
GO_NEGATIVE_REGULATION_OF_MAPK_CASCADE	0.301575	0.452774	0.741015
GO_CHEMICAL_HOMEOSTASIS	0.201499	0.471698	0.741021
GO_CHROMATIN_ORGANIZATION	0.244131	0.45082	0.741099
GO_NEURON_PROJECTION	0.207444	0.478923	0.741382
GO_VACUOLAR_LUMEN	0.257056	0.467787	0.742085
GO_PHAGOCYTIC_VESICLE	0.26873	0.455679	0.742104
GO_POSITIVE_REGULATION_OF_CHEMOTAXIS	0.277344	0.477401	0.742385
GO_REGULATION_OF_RESPONSE_TO_BIOTIC_STIMULUS	0.208746	0.456227	0.742399
GO_CELL_RECOGNITION	0.312556	0.471495	0.743063
GO_REGULATION_OF_DNA_BINDING_TRANSCRIPTION_FACTOR_ACTIVITY	0.227154	0.464474	0.743466
GO_REGULATION_OF_ORGANELLE_ORGANIZATION	0.197714	0.468458	0.743955
GO_DEVELOPMENTAL_CELL_GROWTH	0.292313	0.497872	0.748097
GO_CELL_JUNCTION_ASSEMBLY	0.253483	0.469188	0.748537
GO_ENDOCYTIC_VESICLE_MEMBRANE	0.264782	0.476529	0.749067
GO_AXON	0.244372	0.490385	0.749874
GO_REGULATION_OF_ION_TRANSPORT	0.225463	0.5	0.749945
GO_ANION_TRANSPORT	0.256714	0.48	0.755035
GO_CELL_CELL_ADHESION_VIA_PLASMA_MEMBRANE_ADHESION_MOLECULES	0.303534	0.48368	0.755835
GO_REGULATION_OF_MITOTIC_CELL_CYCLE	0.227727	0.503876	0.755959
GO_PROTEIN_KINASE_ACTIVITY	0.227494	0.496011	0.756323
GO_ENDOPLASMIC_RETICULUM_GOLGI_INTERMEDIATE_COMPARTMENT	0.283285	0.485968	0.756484
GO_NEGATIVE_REGULATION_OF_IMMUNE_RESPONSE	0.259867	0.482419	0.756644
GO_POSITIVE_REGULATION_OF_SIGNALING	0.180091	0.519168	0.756869
GO_REGULATION_OF_TRANSMEMBRANE_TRANSPORT	0.232531	0.493894	0.757631
GO_RESPONSE_TO_GROWTH_FACTOR	0.202084	0.510746	0.75954
GO_SMALL_MOLECULE_METABOLIC_PROCESS	0.185829	0.522624	0.762952
GO_CYTOSKELETON_ORGANIZATION	0.194277	0.527294	0.763655
GO_MAMMARY_GLAND_DEVELOPMENT	0.295342	0.5	0.763994
GO_MICROTUBULE_ORGANIZING_CENTER	0.235048	0.489712	0.765884
GO_TRANSFERASE_ACTIVITY_TRANSFERRING_PHOSPHORUS_CONTAINING_GROUPS	0.207491	0.516605	0.767022
GO_ENZYME_ACTIVATOR_ACTIVITY	0.214155	0.513548	0.770558
GO_NEGATIVE_REGULATION_OF_CYTOKINE_PRODUCTION	0.239372	0.492414	0.771248
GO_CELL_JUNCTION	0.185931	0.522727	0.771268
GO_LEADING_EDGE_MEMBRANE	0.301915	0.506747	0.771983
GO_CELLULAR_RESPONSE_TO_STEROID_HORMONE_STIMULUS	0.27102	0.520626	0.772308
GO_POSITIVE_REGULATION_OF_PEPTIDYL_TYROSINE_PHOSPHORYLATION	0.283626	0.501462	0.772352
GO_POSITIVE_REGULATION_OF_LEUKOCYTE_CELL_CELL_ADHESION	0.252213	0.516713	0.772477
GO_CYTOKINE_PRODUCTION_INVOLVED_IN_IMMUNE_RESPONSE	0.302845	0.51506	0.77289
GO_NEGATIVE_REGULATION_OF_CELL_CYCLE	0.220751	0.525226	0.773431
GO_ACTIN_BINDING	0.22578	0.52349	0.774278
GO_REGULATION_OF_ION_TRANSMEMBRANE_TRANSPORT	0.244892	0.517147	0.77556
GO_NEGATIVE_REGULATION_OF_EXTRINSIC_APOPTOTIC_SIGNALING_PATHWAY	0.295361	0.509716	0.775813
GO_NEGATIVE_REGULATION_OF_CELL_ADHESION	0.229129	0.51847	0.778641
GO_EXTRINSIC_APOPTOTIC_SIGNALING_PATHWAY	0.243861	0.504854	0.781015
GO_LIPID_METABOLIC_PROCESS	0.195482	0.565789	0.78339
GO_POSITIVE_REGULATION_OF_ION_TRANSMEMBRANE_TRANSPORT	0.29384	0.546921	0.783899
GO_CELL_CYCLE_PROCESS	0.190459	0.53151	0.784242
GO_REGULATION_OF_EXTRINSIC_APOPTOTIC_SIGNALING_PATHWAY	0.266558	0.532428	0.784595
GO_RESPONSE_TO_AMMONIUM_ION	0.300668	0.50077	0.784622
GO_CENTROSOME	0.244803	0.511596	0.785948
GO_NEGATIVE_REGULATION_OF_KINASE_ACTIVITY	0.247151	0.528409	0.785956
GO_POSITIVE_REGULATION_OF_HEMOPOIESIS	0.23333	0.539662	0.790729
GO_REGULATION_OF_LIPID_LOCALIZATION	0.29992	0.528594	0.792618
GO_EMBRYO_DEVELOPMENT	0.203174	0.550251	0.7942
GO_REGULATION_OF_CELLULAR_AMIDE_METABOLIC_PROCESS	0.215467	0.563144	0.797314
GO_MITOTIC_CELL_CYCLE	0.199129	0.579284	0.801246
GO_ENDOCYTIC_VESICLE	0.2187	0.555703	0.801725
GO_POSITIVE_REGULATION_OF_CANONICAL_WNT_SIGNALING_PATHWAY	0.291628	0.530612	0.802214
GO_REGULATION_OF_LEUKOCYTE_PROLIFERATION	0.239564	0.551136	0.802506
GO_ATPASE_ACTIVITY	0.26981	0.543446	0.802702
GO_PROTEIN_FOLDING	0.296534	0.569018	0.803165
GO_REGULATION_OF_TRANSFERASE_ACTIVITY	0.189262	0.571934	0.803373
GO_NEGATIVE_REGULATION_OF_CELL_MOTILITY	0.242694	0.573066	0.803487
GO_NEGATIVE_REGULATION_OF_LEUKOCYTE_CELL_CELL_ADHESION	0.266569	0.5613	0.804337
GO_REPRODUCTION	0.189863	0.584634	0.807395
GO_REGULATION_OF_CELLULAR_COMPONENT_MOVEMENT	0.180934	0.593356	0.807619
GO_POSITIVE_REGULATION_OF_SUPRAMOLECULAR_FIBER_ORGANIZATION	0.242045	0.563014	0.810968
GO_ANTIGEN_RECEPTOR_MEDIATED_SIGNALING_PATHWAY	0.240024	0.560748	0.813052
GO_POSITIVE_REGULATION_OF_CELL_CELL_ADHESION	0.235294	0.58728	0.813338
GO_DNA_BIOSYNTHETIC_PROCESS	0.278221	0.585106	0.814317
GO_APOPTOTIC_SIGNALING_PATHWAY	0.188205	0.609938	0.815742
GO_CELLULAR_RESPONSE_TO_OXYGEN_LEVELS	0.230683	0.588391	0.816736
GO_ENDOTHELIAL_CELL_PROLIFERATION	0.271737	0.569254	0.816769
GO_GUANYL_NUCLEOTIDE_BINDING	0.235806	0.574932	0.816784
GO_NEGATIVE_REGULATION_OF_ESTABLISHMENT_OF_PROTEIN_LOCALIZATION	0.285582	0.567164	0.81679
GO_CHEMOKINE_PRODUCTION	0.271748	0.574184	0.817045
GO_CLATHRIN_COATED_VESICLE	0.287233	0.606015	0.81709
GO_REGULATION_OF_AUTOPHAGY	0.236507	0.583673	0.81811
GO_ACTIN_FILAMENT_BASED_PROCESS	0.193347	0.629766	0.819163
GO_EAR_DEVELOPMENT	0.290925	0.589063	0.819232
GO_REGULATION_OF_MORPHOGENESIS_OF_AN_EPITHELIUM	0.268718	0.584337	0.819886
GO_CELL_CYCLE_ARREST	0.258097	0.589311	0.819954
GO_NEGATIVE_REGULATION_OF_SUPRAMOLECULAR_FIBER_ORGANIZATION	0.280236	0.580247	0.820326
GO_ROUGH_ENDOPLASMIC_RETICULUM	0.278016	0.564103	0.820794
GO_POSITIVE_REGULATION_OF_TRANSMEMBRANE_TRANSPORT	0.259023	0.572065	0.820821
GO_SECRETORY_GRANULE_MEMBRANE	0.203952	0.597686	0.820896
GO_MUSCLE_CELL_DIFFERENTIATION	0.243697	0.585611	0.821025
GO_DRUG_METABOLIC_PROCESS	0.211517	0.563939	0.821382
GO_REGULATION_OF_MEMBRANE_POTENTIAL	0.249668	0.584397	0.821711
GO_MODIFICATION_DEPENDENT_MACROMOLECULE_CATABOLIC_PROCESS	0.198416	0.600746	0.821739
GO_ENDOPLASMIC_RETICULUM	0.176215	0.62073	0.821801
GO_GOLGI_VESICLE_TRANSPORT	0.237641	0.606603	0.821986
GO_REGULATION_OF_CATION_TRANSMEMBRANE_TRANSPORT	0.245168	0.588983	0.822034
GO_PEPTIDE_HORMONE_SECRETION	0.28108	0.583211	0.822141
GO_CHROMOSOME_ORGANIZATION	0.196837	0.612658	0.822178
GO_T_CELL_RECEPTOR_SIGNALING_PATHWAY	0.247266	0.573864	0.822276
GO_PROTEIN_POLYUBIQUITINATION	0.235563	0.610054	0.822558
GO_REACTIVE_OXYGEN_SPECIES_METABOLIC_PROCESS	0.218353	0.617772	0.822802
GO_NEGATIVE_REGULATION_OF_CELL_CELL_ADHESION	0.242903	0.583569	0.823082
GO_NEGATIVE_REGULATION_OF_CELLULAR_CATABOLIC_PROCESS	0.238498	0.595862	0.82309
GO_POSITIVE_REGULATION_OF_RESPONSE_TO_BIOTIC_STIMULUS	0.200426	0.611183	0.823343
GO_REGULATION_OF_NERVOUS_SYSTEM_DEVELOPMENT	0.193876	0.626087	0.823547
GO_CATION_TRANSMEMBRANE_TRANSPORT	0.198361	0.617795	0.823752
GO_REGULATION_OF_METAL_ION_TRANSPORT	0.213529	0.604	0.824408
GO_NEURON_SPINE	0.268411	0.615267	0.824412
GO_REGULATION_OF_EPITHELIAL_CELL_MIGRATION	0.225939	0.603043	0.824623
GO_POSITIVE_REGULATION_OF_CATALYTIC_ACTIVITY	0.167598	0.656428	0.824663
GO_CELL_ADHESION_MOLECULE_BINDING	0.186548	0.635018	0.824671
GO_PROTEIN_STABILIZATION	0.252248	0.61527	0.824693
GO_UBIQUITIN_LIKE_PROTEIN_TRANSFERASE_ACTIVITY	0.226979	0.606993	0.825551
GO_NEGATIVE_REGULATION_OF_TRANSFERASE_ACTIVITY	0.221176	0.626359	0.825565
GO_REGULATION_OF_CELLULAR_COMPONENT_SIZE	0.206932	0.62336	0.825786
GO_PHOSPHOLIPID_BINDING	0.224863	0.615697	0.825967
GO_REGULATION_OF_ENDOTHELIAL_CELL_MIGRATION	0.249052	0.622721	0.826869
GO_LIPID_BINDING	0.198403	0.648895	0.828721
GO_POSITIVE_REGULATION_OF_IMMUNE_EFFECTOR_PROCESS	0.230635	0.618915	0.828856
GO_RIBONUCLEOPROTEIN_COMPLEX_BINDING	0.264595	0.621785	0.829136
GO_REGULATION_OF_MACROAUTOPHAGY	0.273563	0.633588	0.829326
GO_MUSCLE_CONTRACTION	0.259409	0.620087	0.829712
GO_REGULATION_OF_SMALL_MOLECULE_METABOLIC_PROCESS	0.213928	0.602378	0.830089
GO_MICROTUBULE_CYTOSKELETON_ORGANIZATION	0.241643	0.624286	0.831162
GO_NEURON_APOPTOTIC_PROCESS	0.22714	0.631794	0.83214
GO_DNA_REPAIR	0.225994	0.627451	0.835607
GO_REGULATION_OF_PHOSPHOPROTEIN_PHOSPHATASE_ACTIVITY	0.259471	0.592366	0.835644
GO_GOLGI_MEMBRANE	0.200677	0.638522	0.835882
GO_OUTER_MEMBRANE	0.268201	0.622901	0.837063
GO_ANIMAL_ORGAN_MORPHOGENESIS	0.179222	0.700246	0.838418
GO_REGULATION_OF_INTRACELLULAR_PROTEIN_TRANSPORT	0.239559	0.615942	0.838887
GO_RESPONSE_TO_XENOBIOTIC_STIMULUS	0.259254	0.632375	0.839241
GO_I_KAPPAB_KINASE_NF_KAPPAB_SIGNALING	0.210409	0.671485	0.83933
GO_POSITIVE_REGULATION_OF_MOLECULAR_FUNCTION	0.159882	0.734831	0.839507
GO_APICAL_PART_OF_CELL	0.225754	0.637394	0.839542
GO_REGULATION_OF_INTRACELLULAR_TRANSPORT	0.214241	0.655914	0.83978
GO_EMBRYONIC_MORPHOGENESIS	0.203355	0.630872	0.8404
GO_CELL_PROJECTION_MEMBRANE	0.244583	0.635447	0.840446
GO_REGULATION_OF_INTRINSIC_APOPTOTIC_SIGNALING_PATHWAY	0.228098	0.622563	0.841088
GO_NEGATIVE_REGULATION_OF_PHOSPHORUS_METABOLIC_PROCESS	0.189124	0.669221	0.841101
GO_CIRCADIAN_RHYTHM	0.258376	0.613703	0.841293
GO_CELL_CYCLE_G1_S_PHASE_TRANSITION	0.245558	0.636879	0.841674
GO_ACTIN_CYTOSKELETON	0.200134	0.644703	0.842564
GO_NEGATIVE_REGULATION_OF_CATABOLIC_PROCESS	0.204514	0.666223	0.844364
GO_REGULATION_OF_RESPONSE_TO_DNA_DAMAGE_STIMULUS	0.246158	0.642136	0.844781
GO_ANTIGEN_PROCESSING_AND_PRESENTATION_OF_PEPTIDE_ANTIGEN_VIA_MHC_CLASS_I	0.240379	0.64622	0.845553
GO_CARDIAC_MUSCLE_TISSUE_DEVELOPMENT	0.264713	0.661043	0.847302
GO_NEGATIVE_REGULATION_OF_MRNA_METABOLIC_PROCESS	0.266197	0.655786	0.847331
GO_INTRACELLULAR_RECEPTOR_SIGNALING_PATHWAY	0.222259	0.670315	0.847774
GO_REGULATION_OF_MICROTUBULE_BASED_PROCESS	0.266014	0.642314	0.848052
GO_ACTIN_CYTOSKELETON_REORGANIZATION	0.263225	0.648773	0.848515
GO_REGULATION_OF_SYNAPSE_STRUCTURE_OR_ACTIVITY	0.253445	0.651537	0.848558
GO_CELL_CORTEX	0.208066	0.653203	0.849188
GO_RECEPTOR_INTERNALIZATION	0.253939	0.656535	0.849708
GO_REGULATION_OF_CELLULAR_COMPONENT_BIOGENESIS	0.175752	0.704819	0.849961
GO_REGULATION_OF_PEPTIDASE_ACTIVITY	0.193439	0.684143	0.851737
GO_POSITIVE_REGULATION_OF_CELL_PROJECTION_ORGANIZATION	0.216764	0.665738	0.851757
GO_AZUROPHIL_GRANULE_LUMEN	0.244531	0.665158	0.852113
GO_TRANSCRIPTION_COACTIVATOR_ACTIVITY	0.244205	0.674064	0.852158
GO_SENSORY_ORGAN_MORPHOGENESIS	0.260896	0.657233	0.852166
GO_SPLICEOSOMAL_COMPLEX	0.222828	0.667614	0.852196
GO_PHOSPHATASE_BINDING	0.219955	0.677233	0.85373
GO_ACTIN_FILAMENT_BINDING	0.23678	0.659357	0.854012
GO_REGULATION_OF_TRANSCRIPTION_FROM_RNA_POLYMERASE_II_PROMOTER_IN_RESPONSE_TO_HYPOXIA	0.252386	0.679818	0.854165
GO_NEGATIVE_REGULATION_OF_CANONICAL_WNT_SIGNALING_PATHWAY	0.249287	0.670487	0.85435
GO_POLYMERIC_CYTOSKELETAL_FIBER	0.208255	0.694595	0.854892
GO_REGULATION_OF_PHOSPHATASE_ACTIVITY	0.229323	0.684211	0.856705
GO_POSITIVE_REGULATION_OF_CYTOSKELETON_ORGANIZATION	0.217895	0.681333	0.857148
GO_ALCOHOL_METABOLIC_PROCESS	0.235912	0.701062	0.857803
GO_ENDOMEMBRANE_SYSTEM_ORGANIZATION	0.20138	0.680965	0.857881
GO_PRESYNAPSE	0.223395	0.689306	0.858048
GO_RNA_BINDING	0.151797	0.771523	0.858281
GO_ORGANIC_ACID_METABOLIC_PROCESS	0.177553	0.72601	0.858542
GO_NUCLEOLUS	0.171621	0.72418	0.859159
GO_SENSORY_PERCEPTION	0.218262	0.696532	0.859522
GO_NEGATIVE_REGULATION_OF_NEURON_DIFFERENTIATION	0.246589	0.677711	0.85975
GO_EPITHELIAL_CELL_DEVELOPMENT	0.220166	0.689706	0.86076
GO_TISSUE_MIGRATION	0.195535	0.693122	0.860841
GO_EMBRYONIC_ORGAN_DEVELOPMENT	0.209915	0.692194	0.860849
GO_CALMODULIN_BINDING	0.257256	0.696241	0.861445
GO_PLASMA_MEMBRANE_REGION	0.17566	0.729352	0.861629
GO_TISSUE_MORPHOGENESIS	0.184199	0.732075	0.861857
GO_CELL_GROWTH	0.186939	0.708812	0.862103
GO_CELLULAR_CARBOHYDRATE_METABOLIC_PROCESS	0.24513	0.692996	0.862585
GO_CARBOHYDRATE_DERIVATIVE_BIOSYNTHETIC_PROCESS	0.193119	0.715646	0.862691
GO_DRUG_BINDING	0.161383	0.774232	0.862776
GO_NEGATIVE_REGULATION_OF_TRANSPORT	0.187876	0.745383	0.863277
GO_PROCESS_UTILIZING_AUTOPHAGIC_MECHANISM	0.188792	0.727273	0.863468
GO_ORGANOPHOSPHATE_METABOLIC_PROCESS	0.171176	0.746032	0.863496
GO_REGULATION_OF_CELL_CYCLE_G2_M_PHASE_TRANSITION	0.242366	0.676554	0.863625
GO_ACTIN_FILAMENT_POLYMERIZATION	0.217652	0.692847	0.863626
GO_POSITIVE_REGULATION_OF_EPITHELIAL_CELL_MIGRATION	0.226045	0.709064	0.863841
GO_ENDOTHELIUM_DEVELOPMENT	0.246297	0.700468	0.863915
GO_NEGATIVE_REGULATION_OF_BINDING	0.237235	0.693939	0.864799
GO_COVALENT_CHROMATIN_MODIFICATION	0.233099	0.713881	0.864936
GO_LAMELLIPODIUM	0.238016	0.717647	0.865261
GO_DENDRITIC_TREE	0.191399	0.7251	0.867824
GO_REGULATION_OF_CELLULAR_CATABOLIC_PROCESS	0.160842	0.77685	0.869067
GO_NEGATIVE_REGULATION_OF_WNT_SIGNALING_PATHWAY	0.234178	0.726859	0.869534
GO_MICROTUBULE_BASED_PROCESS	0.195189	0.75307	0.869598
GO_POSITIVE_REGULATION_OF_KINASE_ACTIVITY	0.17949	0.743455	0.869973
GO_REGULATION_OF_CELL_MATRIX_ADHESION	0.241675	0.733529	0.870582
GO_PEPTIDYL_SERINE_MODIFICATION	0.212008	0.723373	0.870844
GO_APICAL_PLASMA_MEMBRANE	0.228214	0.710015	0.870886
GO_VACUOLAR_MEMBRANE	0.174628	0.770202	0.872285
GO_ACTIVE_TRANSMEMBRANE_TRANSPORTER_ACTIVITY	0.230787	0.707101	0.873565
GO_CARBOHYDRATE_BIOSYNTHETIC_PROCESS	0.248159	0.717095	0.876304
GO_NEGATIVE_REGULATION_OF_PROTEIN_MODIFICATION_BY_SMALL_PROTEIN_CONJUGATION_OR_REMOVAL	0.246158	0.708783	0.879063
GO_AGING	0.197466	0.770629	0.879177
GO_POSITIVE_REGULATION_OF_INTRACELLULAR_TRANSPORT	0.211201	0.727811	0.880771
GO_ESTABLISHMENT_OR_MAINTENANCE_OF_CELL_POLARITY	0.228912	0.731278	0.881721
GO_CIRCULATORY_SYSTEM_PROCESS	0.192044	0.777778	0.881875
GO_SIGNAL_RELEASE	0.214845	0.755216	0.882149
GO_RIBONUCLEOTIDE_BINDING	0.150401	0.832143	0.88227
GO_RESPONSE_TO_LEUKEMIA_INHIBITORY_FACTOR	0.239908	0.706605	0.88254
GO_PURINE_CONTAINING_COMPOUND_METABOLIC_PROCESS	0.194007	0.778086	0.883208
GO_CELL_SUBSTRATE_JUNCTION	0.157137	0.81697	0.883233
GO_UROGENITAL_SYSTEM_DEVELOPMENT	0.218673	0.763425	0.883383
GO_AMEBOIDAL_TYPE_CELL_MIGRATION	0.178744	0.751015	0.883602
GO_MITOTIC_NUCLEAR_DIVISION	0.238733	0.743777	0.884248
GO_RHYTHMIC_PROCESS	0.217324	0.751118	0.88453
GO_UBIQUITIN_LIKE_PROTEIN_LIGASE_ACTIVITY	0.242443	0.738794	0.885409
GO_CELL_SUBSTRATE_ADHESION	0.187207	0.770861	0.886482
GO_CELL_JUNCTION_ORGANIZATION	0.187468	0.779255	0.888071
GO_POSITIVE_REGULATION_OF_INTRACELLULAR_PROTEIN_TRANSPORT	0.234272	0.744648	0.889549
GO_POSITIVE_REGULATION_OF_NEURON_PROJECTION_DEVELOPMENT	0.208249	0.753561	0.893793
GO_POSITIVE_REGULATION_OF_JNK_CASCADE	0.228198	0.748905	0.893835
GO_NEGATIVE_REGULATION_OF_PROTEIN_CONTAINING_COMPLEX_ASSEMBLY	0.231963	0.743284	0.894618
GO_CATALYTIC_COMPLEX	0.153881	0.83353	0.895138
GO_PROTEIN_POLYMERIZATION	0.199457	0.785816	0.898032
GO_DEPHOSPHORYLATION	0.168294	0.804781	0.899596
GO_REGULATION_OF_RESPONSE_TO_WOUNDING	0.209948	0.79476	0.900353
GO_REGULATION_OF_DNA_METABOLIC_PROCESS	0.188627	0.80758	0.901299
GO_SPHINGOLIPID_METABOLIC_PROCESS	0.23266	0.779687	0.901385
GO_MONOVALENT_INORGANIC_CATION_HOMEOSTASIS	0.231639	0.786787	0.901467
GO_PROTEIN_HETERODIMERIZATION_ACTIVITY	0.185927	0.7875	0.902362
GO_REGULATION_OF_CHROMOSOME_ORGANIZATION	0.204262	0.782247	0.902597
GO_REGULATION_OF_CYSTEINE_TYPE_ENDOPEPTIDASE_ACTIVITY	0.191369	0.790859	0.902769
GO_T_CELL_ACTIVATION_INVOLVED_IN_IMMUNE_RESPONSE	0.223362	0.790869	0.903417
GO_JNK_CASCADE	0.192655	0.817549	0.904047
GO_DNA_METABOLIC_PROCESS	0.163902	0.835616	0.904801
GO_CATION_TRANSMEMBRANE_TRANSPORTER_ACTIVITY	0.201226	0.792151	0.905777
GO_ESTABLISHMENT_OF_ORGANELLE_LOCALIZATION	0.191934	0.803324	0.905906
GO_COGNITION	0.207031	0.793103	0.9066
GO_CARDIAC_CHAMBER_DEVELOPMENT	0.229256	0.776957	0.906982
GO_POSITIVE_REGULATION_OF_PROTEIN_CONTAINING_COMPLEX_ASSEMBLY	0.198921	0.795518	0.913365
GO_ADENYL_NUCLEOTIDE_BINDING	0.146511	0.877069	0.913842
GO_REGULATION_OF_DEPHOSPHORYLATION	0.190281	0.82029	0.914055
GO_ACTIN_POLYMERIZATION_OR_DEPOLYMERIZATION	0.185981	0.827298	0.914125
GO_POSITIVE_REGULATION_OF_NEURON_DIFFERENTIATION	0.193087	0.815451	0.914219
GO_REGULATION_OF_PROTEIN_DEPHOSPHORYLATION	0.19529	0.808908	0.914244
GO_ORGANELLE_LOCALIZATION	0.176938	0.829235	0.914475
GO_NEGATIVE_REGULATION_OF_CELLULAR_COMPONENT_ORGANIZATION	0.156492	0.843478	0.914545
GO_POSITIVE_REGULATION_OF_STRESS_ACTIVATED_PROTEIN_KINASE_SIGNALING_CASCADE	0.212047	0.806835	0.914639
GO_REGULATION_OF_BLOOD_PRESSURE	0.214809	0.806835	0.914899
GO_INTRACELLULAR_TRANSPORT	0.131146	0.90677	0.915219
GO_REGULATION_OF_PROTEIN_CONTAINING_COMPLEX_ASSEMBLY	0.167229	0.838881	0.92211
GO_REGULATION_OF_CELLULAR_LOCALIZATION	0.141651	0.887425	0.924989
GO_PROTEIN_PHOSPHATASE_BINDING	0.197578	0.844444	0.926017
GO_REGULATION_OF_PROTEIN_LOCALIZATION_TO_CELL_PERIPHERY	0.211686	0.821739	0.926131
GO_REGULATION_OF_HORMONE_SECRETION	0.21125	0.852123	0.926174
GO_NUCLEAR_EXPORT	0.206369	0.839564	0.926767
GO_REGULATION_OF_CATABOLIC_PROCESS	0.140576	0.899306	0.92713
GO_ALPHA_BETA_T_CELL_ACTIVATION	0.19613	0.835616	0.927215
GO_ENDOTHELIAL_CELL_MIGRATION	0.180708	0.851296	0.927567
GO_PROTEIN_CONTAINING_COMPLEX_ASSEMBLY	0.133656	0.918367	0.927721
GO_REGULATION_OF_T_CELL_DIFFERENTIATION	0.203777	0.834067	0.928264
GO_LYMPHOCYTE_ACTIVATION_INVOLVED_IN_IMMUNE_RESPONSE	0.18946	0.851485	0.928402
GO_CELL_DIVISION	0.161931	0.871863	0.928558
GO_TYPE_I_INTERFERON_PRODUCTION	0.195442	0.860465	0.929833
GO_CELLULAR_DETOXIFICATION	0.208372	0.853157	0.933227
GO_PROTEIN_DNA_COMPLEX_SUBUNIT_ORGANIZATION	0.202155	0.833828	0.933492
GO_MICROTUBULE_BASED_MOVEMENT	0.207154	0.836336	0.933578
GO_CYTOSKELETON_DEPENDENT_INTRACELLULAR_TRANSPORT	0.209083	0.838811	0.933634
GO_REGULATION_OF_HORMONE_LEVELS	0.175612	0.850069	0.933679
GO_ORGANELLE_FISSION	0.197438	0.856037	0.933774
GO_INTRINSIC_COMPONENT_OF_ENDOPLASMIC_RETICULUM_MEMBRANE	0.199695	0.846386	0.934081
GO_HORMONE_TRANSPORT	0.197381	0.845345	0.934569
GO_MACROAUTOPHAGY	0.174165	0.847826	0.935116
GO_PROTEIN_CONTAINING_COMPLEX_DISASSEMBLY	0.183712	0.842407	0.935273
GO_RESPONSE_TO_OXYGEN_LEVELS	0.15163	0.874839	0.935706
GO_SMALL_GTPASE_MEDIATED_SIGNAL_TRANSDUCTION	0.15454	0.863874	0.935762
GO_SMALL_GTPASE_BINDING	0.170238	0.877747	0.939177
GO_BASOLATERAL_PLASMA_MEMBRANE	0.199055	0.868098	0.939241
GO_POSITIVE_REGULATION_OF_TRANSFERASE_ACTIVITY	0.140802	0.900629	0.939957
GO_INTRACELLULAR_PROTEIN_TRANSPORT	0.126009	0.942922	0.941922
GO_POSITIVE_REGULATION_OF_ORGANELLE_ORGANIZATION	0.137922	0.924298	0.9469
GO_ORGANONITROGEN_COMPOUND_BIOSYNTHETIC_PROCESS	0.117773	0.960762	0.948176
GO_NEGATIVE_REGULATION_OF_CELLULAR_AMIDE_METABOLIC_PROCESS	0.195463	0.871533	0.949422
GO_REGULATION_OF_PROTEIN_LOCALIZATION_TO_MEMBRANE	0.171867	0.895894	0.950202
GO_MRNA_METABOLIC_PROCESS	0.122011	0.961009	0.952549
GO_NUCLEOBASE_CONTAINING_SMALL_MOLECULE_METABOLIC_PROCESS	0.150131	0.916237	0.953645
GO_RHO_GTPASE_BINDING	0.199711	0.884146	0.953925
GO_GTPASE_BINDING	0.156013	0.906077	0.954499
GO_CELL_CYCLE_G2_M_PHASE_TRANSITION	0.174319	0.882979	0.954605
GO_POSITIVE_REGULATION_OF_DNA_METABOLIC_PROCESS	0.179986	0.908537	0.954978
GO_DETOXIFICATION	0.189811	0.881381	0.955705
GO_PEPTIDYL_AMINO_ACID_MODIFICATION	0.123962	0.956258	0.960042
GO_REGULATION_OF_LEUKOCYTE_APOPTOTIC_PROCESS	0.181576	0.905488	0.960726
GO_FEMALE_PREGNANCY	0.182052	0.912593	0.960827
GO_ALPHA_BETA_T_CELL_DIFFERENTIATION	0.186167	0.913819	0.961907
GO_MOLECULAR_ADAPTOR_ACTIVITY	0.170386	0.921397	0.962122
GO_ACTIN_BASED_CELL_PROJECTION	0.181026	0.905632	0.962699
GO_CELLULAR_MACROMOLECULE_LOCALIZATION	0.109067	0.982514	0.963246
GO_NUCLEAR_OUTER_MEMBRANE_ENDOPLASMIC_RETICULUM_MEMBRANE_NETWORK	0.114337	0.956316	0.96514
GO_CELLULAR_NITROGEN_COMPOUND_CATABOLIC_PROCESS	0.119673	0.966507	0.965279
GO_RESPONSE_TO_ALCOHOL	0.146471	0.928771	0.965335
GO_NUCLEIC_ACID_PHOSPHODIESTER_BOND_HYDROLYSIS	0.176459	0.913107	0.966374
GO_PROTEIN_LOCALIZATION_TO_MEMBRANE	0.115266	0.976019	0.966749
GO_PEPTIDYL_LYSINE_MODIFICATION	0.172706	0.940341	0.967
GO_ENVELOPE	0.117922	0.955445	0.968115
GO_GLUCOSE_METABOLIC_PROCESS	0.17159	0.928675	0.972636
GO_REGULATION_OF_CELLULAR_PROTEIN_LOCALIZATION	0.124949	0.9553	0.974159
GO_TRANSFERASE_COMPLEX	0.130683	0.95102	0.974445
GO_NEGATIVE_REGULATION_OF_PROTEIN_CATABOLIC_PROCESS	0.169416	0.94	0.974477
GO_GLUTAMATERGIC_SYNAPSE	0.146526	0.956583	0.974656
GO_PROTEIN_MODIFICATION_BY_SMALL_PROTEIN_CONJUGATION_OR_REMOVAL	0.111501	0.984223	0.978284
GO_PROTEIN_LOCALIZATION_TO_MITOCHONDRION	0.164474	0.956454	0.979395
GO_PROTEIN_SERINE_THREONINE_KINASE_ACTIVITY	0.125017	0.969655	0.983728
GO_PROTEIN_MODIFICATION_BY_SMALL_PROTEIN_CONJUGATION	0.105332	0.98549	0.988472
GO_CELL_PROJECTION_ASSEMBLY	0.137223	0.96897	0.989602
GO_COENZYME_METABOLIC_PROCESS	0.135593	0.989313	0.99476
GO_ORGANIC_CYCLIC_COMPOUND_CATABOLIC_PROCESS	0.0934304	0.992849	0.994811
GO_ANTIGEN_PROCESSING_AND_PRESENTATION_OF_EXOGENOUS_PEPTIDE_ANTIGEN_VIA_MHC_CLASS_I	0.134596	0.988355	0.995168
GO_TRANSCRIPTION_COREGULATOR_ACTIVITY	0.10566	0.987705	0.996911
GO_CARBOHYDRATE_HOMEOSTASIS	0.125921	0.991111	0.997742
GO_RIBONUCLEOPROTEIN_COMPLEX	0.053007	1	0.999973

## Sheet: C2 VS C6
GO UP in C2	ES	NOM p-val	FDR q-val
GO_CHROMOSOME	0.420201	0	0.00753962
GO_RIBONUCLEOPROTEIN_COMPLEX	0.42487	0	0.0165093
GO_RIBOSOME	0.590332	0	0.0176393
GO_MRNA_METABOLIC_PROCESS	0.384284	0	0.0196933
GO_RNA_BINDING	0.340546	0	0.0258654
GO_NUCLEAR_CHROMOSOME	0.428589	0	0.0342056
GO_CYTOSKELETAL_PROTEIN_BINDING	0.406464	0	0.0409612
GO_VACUOLAR_LUMEN	0.503301	0.00397614	0.0566463
GO_CHROMOSOME_ORGANIZATION	0.389547	0.00365631	0.0618591
GO_ESTABLISHMENT_OF_PROTEIN_LOCALIZATION_TO_MEMBRANE	0.464814	0.00564972	0.0635101
GO_NUCLEAR_TRANSCRIBED_MRNA_CATABOLIC_PROCESS	0.488938	0.00184843	0.0645659
GO_ANCHORING_JUNCTION	0.326748	0.0036036	0.0648185
GO_CELLULAR_NITROGEN_COMPOUND_CATABOLIC_PROCESS	0.372785	0.00182815	0.0655647
GO_ACTIN_BINDING	0.443648	0.00742115	0.0656787
GO_MRNA_PROCESSING	0.439446	0.00773694	0.0660342
GO_NUCLEAR_BODY	0.438324	0	0.0664912
GO_RNA_CATABOLIC_PROCESS	0.39583	0	0.0693344
GO_CELL_CELL_JUNCTION	0.479485	0.00713012	0.0701124
GO_PROTEIN_DIMERIZATION_ACTIVITY	0.367688	0.0018315	0.0703479
GO_RNA_PROCESSING	0.377044	0.00779727	0.078688
GO_RESPONSE_TO_VIRUS	0.446306	0.0070922	0.0792132
GO_MRNA_BINDING	0.471239	0.011257	0.0795547
GO_CHROMATIN	0.353764	0.00578035	0.0803758
GO_TRANSCRIPTION_FACTOR_BINDING	0.400006	0.00188679	0.0808354
GO_PROTEIN_TARGETING_TO_MEMBRANE	0.474476	0.00374532	0.0824511
GO_TRANSCRIPTION_REGULATOR_ACTIVITY	0.367655	0.00524476	0.0828712
GO_STRUCTURAL_MOLECULE_ACTIVITY	0.391719	0.00772201	0.087125
GO_CHROMATIN_ORGANIZATION	0.433967	0.00961539	0.0895896
GO_DOUBLE_STRANDED_DNA_BINDING	0.356334	0.0134615	0.0924869
GO_CATALYTIC_COMPLEX	0.317815	0.00576923	0.0925241
GO_RNA_SPLICING	0.379471	0.0132576	0.0956838
GO_IDENTICAL_PROTEIN_BINDING	0.277905	0.00672269	0.0970164
GO_SEQUENCE_SPECIFIC_DNA_BINDING	0.343544	0.010772	0.0986397
GO_RNA_SPLICING_VIA_TRANSESTERIFICATION_REACTIONS	0.427449	0.0124334	0.0993353
GO_SEQUENCE_SPECIFIC_DOUBLE_STRANDED_DNA_BINDING	0.347774	0.00767754	0.0996366
GO_PEPTIDE_BIOSYNTHETIC_PROCESS	0.359081	0.0215827	0.102348
GO_CELLULAR_RESPONSE_TO_DNA_DAMAGE_STIMULUS	0.35364	0.012963	0.102931
GO_ORGANELLE_ASSEMBLY	0.402294	0.0219561	0.104863
GO_CELL_JUNCTION	0.287233	0.00530035	0.106029
GO_REGULATORY_REGION_NUCLEIC_ACID_BINDING	0.357497	0.0159046	0.110188
GO_PROTEIN_HOMODIMERIZATION_ACTIVITY	0.332815	0.0187617	0.111133
GO_KINASE_BINDING	0.329773	0.0135397	0.111954
GO_ADENYL_NUCLEOTIDE_BINDING	0.311164	0.019084	0.112299
GO_DNA_BINDING_TRANSCRIPTION_FACTOR_ACTIVITY	0.382031	0.00899281	0.112942
GO_REGULATION_OF_MRNA_METABOLIC_PROCESS	0.361275	0.0170455	0.115505
GO_CIS_REGULATORY_REGION_BINDING	0.377424	0.0275591	0.125804
GO_SIGNALING_RECEPTOR_BINDING	0.259344	0.0104895	0.130734
GO_EXTRACELLULAR_MATRIX	0.361036	0.0126582	0.130978
GO_CADHERIN_BINDING	0.357794	0.026738	0.132621
GO_COLLAGEN_CONTAINING_EXTRACELLULAR_MATRIX	0.361036	0.025	0.1328
GO_DNA_BINDING_TRANSCRIPTION_FACTOR_ACTIVITY_RNA_POLYMERASE_II_SPECIFIC	0.370237	0.0342857	0.133278
GO_NUCLEAR_SPECK	0.418707	0.0183486	0.13498
GO_TRANSLATIONAL_INITIATION	0.407587	0.0257353	0.136372
GO_VIRAL_GENE_EXPRESSION	0.397371	0.0127042	0.136527
GO_NUCLEOLUS	0.363069	0.0277264	0.137852
GO_CELL_SUBSTRATE_JUNCTION	0.305972	0.0218182	0.138991
GO_CELL_LEADING_EDGE	0.36191	0.0311891	0.140814
GO_AMIDE_BIOSYNTHETIC_PROCESS	0.320521	0.0333333	0.148099
GO_CALCIUM_ION_BINDING	0.353695	0.0361217	0.162103
GO_SUPRAMOLECULAR_COMPLEX	0.33513	0.0290909	0.167935
GO_ACTIN_CYTOSKELETON	0.332477	0.0327273	0.181024
GO_PROTEIN_LOCALIZATION_TO_ORGANELLE	0.284935	0.0239411	0.181904
GO_EPITHELIAL_CELL_DIFFERENTIATION	0.34556	0.0455408	0.19362
GO_BIOLOGICAL_ADHESION	0.260453	0.0326087	0.195904
GO_MAINTENANCE_OF_LOCATION	0.349573	0.0393996	0.204701
GO_PROTEIN_TARGETING	0.3487	0.0607211	0.205298
GO_ESTABLISHMENT_OF_PROTEIN_LOCALIZATION_TO_ORGANELLE	0.315612	0.0413669	0.208386
GO_RIBONUCLEOTIDE_BINDING	0.255899	0.026738	0.213679
GO_CELL_CELL_ADHESION	0.276043	0.0527273	0.216496
GO_DRUG_BINDING	0.271263	0.047259	0.221269
GO_CELL_MORPHOGENESIS_INVOLVED_IN_DIFFERENTIATION	0.348878	0.061657	0.234828
GO_CHROMATIN_BINDING	0.349103	0.0783242	0.235709
GO_MITOCHONDRION	0.270144	0.0507519	0.238656
GO_CELL_CORTEX	0.364722	0.0665434	0.241206
GO_ORGANIC_CYCLIC_COMPOUND_CATABOLIC_PROCESS	0.281784	0.0614828	0.244021
GO_DNA_METABOLIC_PROCESS	0.319514	0.0599251	0.244793
GO_PROTEIN_DOMAIN_SPECIFIC_BINDING	0.291725	0.0650995	0.246329
GO_ANATOMICAL_STRUCTURE_HOMEOSTASIS	0.357549	0.0753676	0.24697
GO_POSTTRANSCRIPTIONAL_REGULATION_OF_GENE_EXPRESSION	0.276899	0.0585009	0.260818
GO_ACTIN_FILAMENT_ORGANIZATION	0.318532	0.0797665	0.270493
GO_HOMEOSTATIC_PROCESS	0.218174	0.04	0.2723
GO_PROTEIN_LOCALIZATION_TO_MEMBRANE	0.277454	0.0710572	0.278167
GO_CELLULAR_PROTEIN_CONTAINING_COMPLEX_ASSEMBLY	0.262784	0.0608856	0.279684
GO_DEFENSE_RESPONSE_TO_OTHER_ORGANISM	0.219706	0.0592593	0.287062
GO_INTRACELLULAR_PROTEIN_TRANSPORT	0.240367	0.0795848	0.288567
GO_REGULATION_OF_ACTIN_FILAMENT_ORGANIZATION	0.314967	0.0942761	0.310276
GO_MULTICELLULAR_ORGANISMAL_HOMEOSTASIS	0.329082	0.0863724	0.310653
GO_HOMEOSTASIS_OF_NUMBER_OF_CELLS	0.353745	0.0989399	0.316699
GO_CELL_ADHESION_MOLECULE_BINDING	0.266506	0.0909091	0.333749
GO_HEART_DEVELOPMENT	0.32635	0.0934579	0.334581
GO_INTRACELLULAR_TRANSPORT	0.209941	0.0794824	0.339347
GO_FC_RECEPTOR_MEDIATED_STIMULATORY_SIGNALING_PATHWAY	0.370336	0.0980769	0.342311
GO_MEMBRANE_REGION	0.354173	0.105788	0.344821
GO_ENDOMEMBRANE_SYSTEM_ORGANIZATION	0.305304	0.111927	0.347615
GO_AZUROPHIL_GRANULE	0.324773	0.115658	0.34804
GO_ACTIN_FILAMENT_BASED_PROCESS	0.265181	0.129278	0.350344
GO_PERINUCLEAR_REGION_OF_CYTOPLASM	0.259978	0.135338	0.350788
GO_EPITHELIUM_DEVELOPMENT	0.247765	0.10987	0.35576
GO_POSITIVE_REGULATION_OF_ORGANELLE_ORGANIZATION	0.257411	0.12334	0.371234
GO_VACUOLE	0.232016	0.106762	0.391127
GO_POSITIVE_REGULATION_OF_TRANSCRIPTION_BY_RNA_POLYMERASE_II	0.253573	0.101266	0.393912
GO_DNA_BINDING_TRANSCRIPTION_ACTIVATOR_ACTIVITY	0.353127	0.141527	0.395481
GO_IMMUNE_EFFECTOR_PROCESS	0.188799	0.114695	0.396318
GO_SKELETAL_SYSTEM_DEVELOPMENT	0.328041	0.138783	0.396706
GO_CELLULAR_MACROMOLECULE_LOCALIZATION	0.20083	0.118397	0.411548
GO_CELL_CYCLE	0.207805	0.137011	0.4132
GO_REGULATION_OF_CELL_ADHESION	0.25185	0.148352	0.424458
GO_MEMBRANE_ORGANIZATION	0.217049	0.13986	0.427925
GO_POSITIVE_REGULATION_OF_ION_TRANSPORT	0.308523	0.163873	0.441302
GO_PROTEIN_MODIFICATION_BY_SMALL_PROTEIN_CONJUGATION	0.285468	0.181989	0.44165
GO_TRANSITION_METAL_ION_BINDING	0.276044	0.169524	0.445254
GO_T_CELL_PROLIFERATION	0.336645	0.159774	0.445342
GO_POSITIVE_REGULATION_OF_CELLULAR_BIOSYNTHETIC_PROCESS	0.19884	0.156069	0.445846
GO_DIVALENT_INORGANIC_CATION_HOMEOSTASIS	0.270476	0.188433	0.446963
GO_RESPONSE_TO_CYTOKINE	0.188863	0.149466	0.447073
GO_REGULATION_OF_CELL_POPULATION_PROLIFERATION	0.19441	0.142857	0.448285
GO_GLAND_DEVELOPMENT	0.283434	0.179756	0.4483
GO_IMMUNE_RESPONSE_REGULATING_CELL_SURFACE_RECEPTOR_SIGNALING_PATHWAY	0.268628	0.16141	0.448582
GO_B_CELL_ACTIVATION	0.298875	0.168539	0.449402
GO_FC_RECEPTOR_SIGNALING_PATHWAY	0.288779	0.192661	0.450991
GO_REPRODUCTIVE_SYSTEM_DEVELOPMENT	0.316039	0.20904	0.451555
GO_REGULATION_OF_CALCIUM_ION_TRANSPORT	0.322595	0.174721	0.453316
GO_CELL_MORPHOGENESIS_INVOLVED_IN_NEURON_DIFFERENTIATION	0.313709	0.197368	0.45403
GO_AXON_DEVELOPMENT	0.302533	0.200371	0.462882
GO_REGULATION_OF_ACTIN_FILAMENT_BASED_PROCESS	0.271166	0.211896	0.464611
GO_TRANSFERASE_ACTIVITY_TRANSFERRING_PHOSPHORUS_CONTAINING_GROUPS	0.260354	0.172906	0.464775
GO_CELL_ACTIVATION	0.17754	0.16	0.465743
GO_CELLULAR_COMPONENT_MORPHOGENESIS	0.226354	0.201452	0.472386
GO_SUPRAMOLECULAR_FIBER_ORGANIZATION	0.249904	0.206107	0.481939
GO_DIVALENT_INORGANIC_CATION_TRANSPORT	0.276356	0.233151	0.487446
GO_RESPONSE_TO_OXYGEN_LEVELS	0.285996	0.191956	0.48942
GO_CELL_PART_MORPHOGENESIS	0.264269	0.240964	0.508852
GO_NUCLEAR_TRANSPORT	0.301937	0.226562	0.51647
GO_MYELOID_LEUKOCYTE_MEDIATED_IMMUNITY	0.200923	0.20438	0.519968
GO_IMMUNE_RESPONSE_REGULATING_SIGNALING_PATHWAY	0.223329	0.201942	0.522544
GO_REGULATION_OF_MRNA_CATABOLIC_PROCESS	0.286146	0.223881	0.528253
GO_CELL_DIVISION	0.285614	0.236036	0.531835
GO_RESPONSE_TO_ABIOTIC_STIMULUS	0.210482	0.259398	0.549613
GO_MICROTUBULE_CYTOSKELETON	0.232932	0.259392	0.551645
GO_REGULATION_OF_ORGANELLE_ORGANIZATION	0.196619	0.236136	0.552344
GO_CELLULAR_RESPONSE_TO_ORGANIC_CYCLIC_COMPOUND	0.218797	0.244165	0.553381
GO_POSITIVE_REGULATION_OF_IMMUNE_RESPONSE	0.193897	0.244782	0.555483
GO_NEGATIVE_REGULATION_OF_ORGANELLE_ORGANIZATION	0.255231	0.261905	0.558616
GO_REGULATION_OF_LEUKOCYTE_PROLIFERATION	0.287536	0.278293	0.564014
GO_GROWTH	0.217037	0.277154	0.570507
GO_POSITIVE_REGULATION_OF_CELL_POPULATION_PROLIFERATION	0.198876	0.259459	0.571601
GO_HYDROLASE_ACTIVITY_ACTING_ON_ESTER_BONDS	0.262796	0.259398	0.591159
GO_DEVELOPMENTAL_PROCESS_INVOLVED_IN_REPRODUCTION	0.245988	0.260456	0.591666
GO_KINASE_ACTIVITY	0.239549	0.283302	0.592259
GO_LYMPHOCYTE_ACTIVATION	0.195816	0.274047	0.59228
GO_VESICLE_ORGANIZATION	0.279623	0.29368	0.592317
GO_ION_TRANSPORT	0.179199	0.284685	0.592977
GO_COAGULATION	0.269501	0.304519	0.59364
GO_ACTIN_POLYMERIZATION_OR_DEPOLYMERIZATION	0.275034	0.289773	0.596145
GO_REGULATION_OF_METAL_ION_TRANSPORT	0.250484	0.316832	0.604544
GO_CELLULAR_RESPONSE_TO_OXYGEN_LEVELS	0.284613	0.313187	0.605003
GO_MYELOID_LEUKOCYTE_ACTIVATION	0.177052	0.27972	0.605927
GO_CELLULAR_AMIDE_METABOLIC_PROCESS	0.186669	0.292135	0.607299
GO_PROTEIN_MODIFICATION_BY_SMALL_PROTEIN_CONJUGATION_OR_REMOVAL	0.223877	0.313433	0.607716
GO_SUPRAMOLECULAR_POLYMER	0.270386	0.306985	0.612384
GO_LAMELLIPODIUM	0.283733	0.337591	0.614868
GO_REGULATION_OF_ION_TRANSPORT	0.219639	0.320298	0.615849
GO_NEGATIVE_REGULATION_OF_MULTI_ORGANISM_PROCESS	0.272651	0.324272	0.622612
GO_REGULATION_OF_CYTOSOLIC_CALCIUM_ION_CONCENTRATION	0.283226	0.322457	0.623077
GO_REGULATION_OF_CYTOSKELETON_ORGANIZATION	0.225599	0.32882	0.625444
GO_ACTIN_FILAMENT_POLYMERIZATION	0.275034	0.334552	0.626051
GO_T_CELL_ACTIVATION	0.206437	0.303797	0.626101
GO_EXOCYTOSIS	0.158997	0.340782	0.626341
GO_CYTOKINE_MEDIATED_SIGNALING_PATHWAY	0.175426	0.357143	0.62784
GO_CELLULAR_LIPID_METABOLIC_PROCESS	0.202028	0.351201	0.629235
GO_PROTEIN_DEPHOSPHORYLATION	0.262287	0.342105	0.630435
GO_CELLULAR_RESPONSE_TO_DRUG	0.22203	0.337615	0.633782
GO_REGULATION_OF_CELL_CELL_ADHESION	0.215279	0.365766	0.634555
GO_SIDE_OF_MEMBRANE	0.220729	0.373134	0.634805
GO_REGULATION_OF_CELLULAR_COMPONENT_SIZE	0.228146	0.362799	0.638285
GO_TRANSFERASE_COMPLEX	0.246182	0.402574	0.653438
GO_POSITIVE_REGULATION_OF_TRANSPORT	0.162564	0.386029	0.655345
GO_POSITIVE_REGULATION_OF_NUCLEOBASE_CONTAINING_COMPOUND_METABOLIC_PROCESS	0.169787	0.379189	0.657228
GO_REGULATION_OF_ANATOMICAL_STRUCTURE_SIZE	0.219793	0.379182	0.658185
GO_PEPTIDE_METABOLIC_PROCESS	0.195908	0.359292	0.658483
GO_POSITIVE_REGULATION_OF_CYTOSKELETON_ORGANIZATION	0.266261	0.38835	0.658609
GO_CELL_CYCLE_PROCESS	0.193156	0.420561	0.65873
GO_CELLULAR_ION_HOMEOSTASIS	0.195678	0.393657	0.659232
GO_MICROTUBULE_ORGANIZING_CENTER	0.257951	0.406308	0.660379
GO_CELLULAR_MACROMOLECULE_CATABOLIC_PROCESS	0.163349	0.412811	0.66081
GO_REGULATION_OF_LYMPHOCYTE_ACTIVATION	0.211946	0.393638	0.661821
GO_ION_TRANSMEMBRANE_TRANSPORTER_ACTIVITY	0.259182	0.409006	0.661993
GO_NEGATIVE_REGULATION_OF_CELL_ADHESION	0.259147	0.388778	0.662705
GO_PRESYNAPSE	0.259323	0.408163	0.675474
GO_DEPHOSPHORYLATION	0.230428	0.43633	0.679994
GO_EXTRINSIC_APOPTOTIC_SIGNALING_PATHWAY	0.261428	0.431412	0.680696
GO_POSITIVE_REGULATION_OF_RNA_METABOLIC_PROCESS	0.163082	0.427817	0.682238
GO_IMMUNE_SYSTEM_DEVELOPMENT	0.161956	0.433645	0.685829
GO_PRODUCTION_OF_MOLECULAR_MEDIATOR_OF_IMMUNE_RESPONSE	0.259768	0.412351	0.688214
GO_REGULATION_OF_GROWTH	0.201475	0.428312	0.690406
GO_NEGATIVE_REGULATION_OF_CELL_CYCLE	0.224221	0.445269	0.69186
GO_MODIFICATION_DEPENDENT_MACROMOLECULE_CATABOLIC_PROCESS	0.221037	0.442652	0.697029
GO_ANIMAL_ORGAN_MORPHOGENESIS	0.19398	0.42959	0.698319
GO_LEUKOCYTE_CELL_CELL_ADHESION	0.204747	0.47026	0.700927
GO_POSITIVE_REGULATION_OF_CELLULAR_COMPONENT_BIOGENESIS	0.21288	0.455224	0.707663
GO_POSITIVE_REGULATION_OF_CELL_ADHESION	0.222263	0.464844	0.710201
GO_CELLULAR_RESPONSE_TO_TOPOLOGICALLY_INCORRECT_PROTEIN	0.256827	0.466411	0.714687
GO_REGULATION_OF_SUPRAMOLECULAR_FIBER_ORGANIZATION	0.212854	0.466	0.717196
GO_PIGMENT_GRANULE	0.234284	0.479087	0.718876
GO_PROTEIN_POLYMERIZATION	0.232617	0.482422	0.720052
GO_METAL_ION_TRANSPORT	0.178648	0.502773	0.721443
GO_CELL_ACTIVATION_INVOLVED_IN_IMMUNE_RESPONSE	0.154722	0.489547	0.723581
GO_RESPONSE_TO_ORGANIC_CYCLIC_COMPOUND	0.164657	0.513109	0.724583
GO_REGULATION_OF_PROTEIN_POLYMERIZATION	0.232617	0.483932	0.724917
GO_NEGATIVE_REGULATION_OF_MOLECULAR_FUNCTION	0.171018	0.5	0.727186
GO_POSITIVE_REGULATION_OF_RESPONSE_TO_BIOTIC_STIMULUS	0.225744	0.476809	0.74071
GO_REGULATION_OF_T_CELL_ACTIVATION	0.204887	0.505376	0.741097
GO_ACTIVATION_OF_IMMUNE_RESPONSE	0.167876	0.524528	0.742205
GO_SECRETION	0.13101	0.539007	0.744009
GO_VESICLE_LUMEN	0.186771	0.518382	0.75004
GO_CELL_GROWTH	0.2205	0.54771	0.766445
GO_OSSIFICATION	0.233295	0.554307	0.776804
GO_NEGATIVE_REGULATION_OF_NUCLEOBASE_CONTAINING_COMPOUND_METABOLIC_PROCESS	0.165861	0.553903	0.77902
GO_POSITIVE_REGULATION_OF_CELL_CELL_ADHESION	0.21936	0.574953	0.781466
GO_CELLULAR_RESPONSE_TO_NITROGEN_COMPOUND	0.166479	0.571942	0.783714
GO_HEAD_DEVELOPMENT	0.205307	0.552529	0.784702
GO_REGULATION_OF_BODY_FLUID_LEVELS	0.185956	0.613553	0.78762
GO_RESPONSE_TO_INTERFERON_GAMMA	0.216865	0.547486	0.787921
GO_INTRINSIC_APOPTOTIC_SIGNALING_PATHWAY	0.201051	0.533203	0.787922
GO_TRANSPORTER_ACTIVITY	0.190211	0.541899	0.79013
GO_REGULATION_OF_CELL_CYCLE	0.159674	0.627148	0.79013
GO_REGULATION_OF_RESPONSE_TO_STRESS	0.132788	0.664825	0.790321
GO_PLASMA_MEMBRANE_REGION	0.199133	0.617261	0.790647
GO_NEGATIVE_REGULATION_OF_PROTEIN_MODIFICATION_PROCESS	0.173028	0.582117	0.790935
GO_RESPONSE_TO_ENDOPLASMIC_RETICULUM_STRESS	0.20287	0.558659	0.791831
GO_TRANSMEMBRANE_TRANSPORT	0.15063	0.581784	0.79231
GO_POSITIVE_REGULATION_OF_CELL_DEATH	0.159203	0.64728	0.79265
GO_POSITIVE_REGULATION_OF_LEUKOCYTE_CELL_CELL_ADHESION	0.21936	0.556962	0.79282
GO_NEURON_DIFFERENTIATION	0.153222	0.625688	0.793168
GO_REGULATION_OF_CELLULAR_RESPONSE_TO_STRESS	0.16071	0.608059	0.793442
GO_MORPHOGENESIS_OF_AN_EPITHELIUM	0.195877	0.620229	0.794787
GO_POSITIVE_REGULATION_OF_DEFENSE_RESPONSE	0.185042	0.570632	0.795382
GO_POSITIVE_REGULATION_OF_CELLULAR_COMPONENT_ORGANIZATION	0.143017	0.634508	0.795421
GO_RESPONSE_TO_INTERLEUKIN_1	0.217015	0.577132	0.795655
GO_MACROMOLECULE_CATABOLIC_PROCESS	0.131571	0.639515	0.796167
GO_CYTOSKELETON_ORGANIZATION	0.148748	0.657801	0.797365
GO_CELL_PROJECTION_ASSEMBLY	0.23348	0.569524	0.798303
GO_LIPID_METABOLIC_PROCESS	0.161318	0.625222	0.798328
GO_LYMPHOCYTE_DIFFERENTIATION	0.19968	0.595628	0.798561
GO_CATION_TRANSPORT	0.154707	0.630769	0.798936
GO_RESPONSE_TO_TOPOLOGICALLY_INCORRECT_PROTEIN	0.217083	0.608782	0.799811
GO_MITOCHONDRIAL_ENVELOPE	0.196741	0.582707	0.800079
GO_NEGATIVE_REGULATION_OF_TRANSCRIPTION_BY_RNA_POLYMERASE_II	0.198644	0.647749	0.800543
GO_ORGANONITROGEN_COMPOUND_BIOSYNTHETIC_PROCESS	0.129823	0.684397	0.830677
GO_ION_TRANSMEMBRANE_TRANSPORT	0.159869	0.697974	0.837657
GO_CELLULAR_RESPONSE_TO_ENDOGENOUS_STIMULUS	0.126389	0.725953	0.838303
GO_PEPTIDYL_AMINO_ACID_MODIFICATION	0.154967	0.711359	0.83909
GO_REACTIVE_OXYGEN_SPECIES_METABOLIC_PROCESS	0.191111	0.673432	0.840558
GO_PHAGOCYTOSIS	0.161149	0.696226	0.841528
GO_NUCLEAR_ENVELOPE	0.182681	0.68972	0.84228
GO_MUSCLE_SYSTEM_PROCESS	0.191787	0.666667	0.842514
GO_POSITIVE_REGULATION_OF_CELLULAR_PROTEIN_LOCALIZATION	0.186971	0.6814	0.842719
GO_REGULATION_OF_PROTEIN_CONTAINING_COMPLEX_ASSEMBLY	0.174483	0.706835	0.843686
GO_POSITIVE_REGULATION_OF_PROTEIN_CONTAINING_COMPLEX_ASSEMBLY	0.197044	0.677734	0.845016
GO_TISSUE_MORPHOGENESIS	0.171242	0.691312	0.847379
GO_CATION_TRANSMEMBRANE_TRANSPORT	0.163797	0.715649	0.847816
GO_PROTEIN_CONTAINING_COMPLEX_ASSEMBLY	0.125102	0.75	0.854444
GO_LIPID_LOCALIZATION	0.181256	0.694139	0.854695
GO_CELL_PROJECTION_ORGANIZATION	0.131141	0.739437	0.85476
GO_NEGATIVE_REGULATION_OF_RESPONSE_TO_STIMULUS	0.121993	0.786232	0.855358
GO_SECRETORY_GRANULE_MEMBRANE	0.16876	0.728175	0.855551
GO_NEGATIVE_REGULATION_OF_CATALYTIC_ACTIVITY	0.148984	0.758621	0.857313
GO_RESPONSE_TO_PEPTIDE_HORMONE	0.191936	0.725092	0.860344
GO_ACTIVATION_OF_INNATE_IMMUNE_RESPONSE	0.195836	0.720588	0.861957
GO_ESTABLISHMENT_OF_ORGANELLE_LOCALIZATION	0.201433	0.722753	0.867981
GO_REGULATION_OF_AUTOPHAGY	0.190037	0.757685	0.868986
GO_REGULATION_OF_HORMONE_LEVELS	0.18794	0.752809	0.86934
GO_REGULATION_OF_CELLULAR_PROTEIN_LOCALIZATION	0.150033	0.769811	0.871975
GO_CELLULAR_RESPONSE_TO_PEPTIDE_HORMONE_STIMULUS	0.192041	0.749518	0.872009
GO_ORGANELLE_LOCALIZATION	0.179726	0.764479	0.873799
GO_REGULATION_OF_CELLULAR_LOCALIZATION	0.129045	0.815443	0.891868
GO_GENERATION_OF_PRECURSOR_METABOLITES_AND_ENERGY	0.176216	0.804104	0.892929
GO_REGULATION_OF_INTRACELLULAR_TRANSPORT	0.163932	0.797774	0.896112
GO_PROTEIN_KINASE_ACTIVITY	0.175983	0.80943	0.899087
GO_NEURON_PROJECTION	0.128337	0.824399	0.900005
GO_NEGATIVE_REGULATION_OF_CATABOLIC_PROCESS	0.167174	0.794574	0.901516
GO_INTERSPECIES_INTERACTION_BETWEEN_ORGANISMS	0.107721	0.851786	0.902244
GO_REGULATION_OF_APOPTOTIC_SIGNALING_PATHWAY	0.135916	0.816135	0.908768
GO_TRANSMEMBRANE_RECEPTOR_PROTEIN_TYROSINE_KINASE_SIGNALING_PATHWAY	0.130312	0.84029	0.911546
GO_NEGATIVE_REGULATION_OF_INTRACELLULAR_SIGNAL_TRANSDUCTION	0.137143	0.870544	0.912336
GO_CELLULAR_RESPONSE_TO_CHEMICAL_STRESS	0.172009	0.839388	0.913424
GO_RESPONSE_TO_HORMONE	0.118841	0.875458	0.91446
GO_ORGANELLE_FISSION	0.172799	0.835539	0.916274
GO_PHOSPHOLIPID_METABOLIC_PROCESS	0.168461	0.850688	0.918346
GO_APOPTOTIC_SIGNALING_PATHWAY	0.115027	0.886447	0.925493
GO_CARBOHYDRATE_DERIVATIVE_METABOLIC_PROCESS	0.114776	0.882136	0.933785
GO_REGULATION_OF_CELLULAR_COMPONENT_BIOGENESIS	0.115059	0.923759	0.939598
GO_RESPONSE_TO_DRUG	0.109314	0.923488	0.941007
GO_HYDROLASE_ACTIVITY_ACTING_ON_ACID_ANHYDRIDES	0.127076	0.88972	0.941301
GO_NUCLEAR_OUTER_MEMBRANE_ENDOPLASMIC_RETICULUM_MEMBRANE_NETWORK	0.106743	0.904159	0.943207
GO_ENVELOPE	0.105916	0.921147	0.943414
GO_REGULATION_OF_HYDROLASE_ACTIVITY	0.102299	0.911032	0.944512
GO_PROCESS_UTILIZING_AUTOPHAGIC_MECHANISM	0.134654	0.919694	0.9449
GO_NEGATIVE_REGULATION_OF_RNA_BIOSYNTHETIC_PROCESS	0.115301	0.920849	0.945049
GO_INTRINSIC_COMPONENT_OF_ORGANELLE_MEMBRANE	0.152906	0.888889	0.945568
GO_MICROTUBULE_BASED_PROCESS	0.151007	0.916667	0.946354
GO_RESPONSE_TO_STEROID_HORMONE	0.154224	0.924188	0.947026
GO_MITOTIC_CELL_CYCLE	0.107579	0.956274	0.973132
GO_REGULATION_OF_DNA_BINDING_TRANSCRIPTION_FACTOR_ACTIVITY	0.126228	0.967093	0.975544
GO_ORGANOPHOSPHATE_BIOSYNTHETIC_PROCESS	0.118046	0.976285	0.984932
GO_REGULATION_OF_INTRACELLULAR_PROTEIN_TRANSPORT	0.124389	0.974406	0.98553
GO_EMBRYO_DEVELOPMENT	0.0937954	0.988189	0.993593
GO UP in C6	ES	NOM p-val	FDR q-val
GO_POSITIVE_REGULATION_OF_MAPK_CASCADE	-0.4325	0	0.0233866
GO_AMIDE_BINDING	-0.592197	0	0.017531
GO_INFLAMMATORY_RESPONSE	-0.354051	0	0.0268938
GO_POSITIVE_REGULATION_OF_ERK1_AND_ERK2_CASCADE	-0.51634	0	0.0207223
GO_POSITIVE_REGULATION_OF_PHOSPHORUS_METABOLIC_PROCESS	-0.350018	0	0.0199031
GO_MYELOID_LEUKOCYTE_MIGRATION	-0.456201	0	0.0179751
GO_ERK1_AND_ERK2_CASCADE	-0.455742	0	0.0155552
GO_POSITIVE_REGULATION_OF_INTRACELLULAR_SIGNAL_TRANSDUCTION	-0.327032	0	0.0295446
GO_POSITIVE_REGULATION_OF_PROTEIN_MODIFICATION_PROCESS	-0.33989	0	0.0282919
GO_REGULATION_OF_MAPK_CASCADE	-0.354568	0	0.0463434
GO_RECEPTOR_REGULATOR_ACTIVITY	-0.444927	0.00442478	0.0449173
GO_NEGATIVE_REGULATION_OF_CELL_DIFFERENTIATION	-0.412507	0.00635593	0.0595058
GO_LEUKOCYTE_CHEMOTAXIS	-0.417383	0	0.0626759
GO_POSITIVE_REGULATION_OF_CELLULAR_CATABOLIC_PROCESS	-0.447597	0.00421053	0.0699645
GO_SYNAPSE_ORGANIZATION	-0.462172	0.0105932	0.067758
GO_CYTOKINE_ACTIVITY	-0.487516	0.00831601	0.0740205
GO_NEUTROPHIL_MIGRATION	-0.464501	0.00422833	0.070417
GO_GRANULOCYTE_MIGRATION	-0.464501	0.00675676	0.0777878
GO_REGULATION_OF_RESPONSE_TO_EXTERNAL_STIMULUS	-0.298234	0.00641026	0.0843395
GO_POSITIVE_REGULATION_OF_CATALYTIC_ACTIVITY	-0.269735	0.00442478	0.088685
GO_SECOND_MESSENGER_MEDIATED_SIGNALING	-0.441229	0.00642398	0.0849592
GO_POSITIVE_REGULATION_OF_CATABOLIC_PROCESS	-0.410321	0.0043956	0.0880413
GO_REGULATION_OF_PHOSPHORYLATION	-0.278868	0.00220751	0.0888569
GO_SIGNAL_TRANSDUCTION_BY_PROTEIN_PHOSPHORYLATION	-0.29952	0.00224719	0.095659
GO_G_PROTEIN_COUPLED_RECEPTOR_SIGNALING_PATHWAY	-0.332538	0.00621118	0.0913105
GO_REGULATION_OF_LEUKOCYTE_MIGRATION	-0.414178	0.00212766	0.0943229
GO_ADAPTIVE_IMMUNE_RESPONSE_BASED_ON_SOMATIC_RECOMBINATION_OF_IMMUNE_RECEPTORS_BUILT_FROM_IMMUNOGLOBULIN_SUPERFAMILY_DOMAINS	-0.384329	0.0225873	0.0888324
GO_REGULATION_OF_IMMUNE_EFFECTOR_PROCESS	-0.360408	0.00445434	0.0899957
GO_REGULATION_OF_CHEMOTAXIS	-0.467283	0.00842105	0.101604
GO_CYTOKINE_RECEPTOR_BINDING	-0.454778	0.0107066	0.101146
GO_HUMORAL_IMMUNE_RESPONSE	-0.391406	0.0108932	0.106582
GO_REGULATION_OF_PROTEIN_CATABOLIC_PROCESS	-0.378066	0.0104603	0.105812
GO_LYMPHOCYTE_MEDIATED_IMMUNITY	-0.371592	0.00863931	0.116279
GO_REGULATION_OF_MAP_KINASE_ACTIVITY	-0.402698	0.0223214	0.113795
GO_RESPONSE_TO_CHEMOKINE	-0.447208	0.0167364	0.117142
GO_REGULATION_OF_IMMUNE_SYSTEM_PROCESS	-0.237999	0.0046729	0.114908
GO_POSITIVE_REGULATION_OF_IMMUNE_SYSTEM_PROCESS	-0.249651	0.0154525	0.111375
GO_POSITIVE_REGULATION_OF_MAP_KINASE_ACTIVITY	-0.439971	0.0170576	0.114249
GO_POSITIVE_REGULATION_OF_SIGNALING	-0.241086	0	0.116764
GO_MOLECULAR_FUNCTION_REGULATOR	-0.26134	0.0156951	0.112041
GO_POSITIVE_REGULATION_OF_PROTEIN_METABOLIC_PROCESS	-0.241264	0.00737101	0.113715
GO_INTRINSIC_COMPONENT_OF_PLASMA_MEMBRANE	-0.30725	0.0111359	0.118306
GO_POSITIVE_REGULATION_OF_MOLECULAR_FUNCTION	-0.240308	0.00888889	0.134117
GO_AGING	-0.430864	0.0303688	0.134176
GO_TAXIS	-0.298524	0.0256959	0.135572
GO_CELL_CHEMOTAXIS	-0.328566	0.0220751	0.135083
GO_RESPONSE_TO_TUMOR_NECROSIS_FACTOR	-0.401192	0.034632	0.136236
GO_GLIOGENESIS	-0.417558	0.022541	0.137849
GO_POSITIVE_REGULATION_OF_LOCOMOTION	-0.301597	0.0173536	0.139198
GO_REGULATION_OF_CELLULAR_COMPONENT_MOVEMENT	-0.267204	0.0155211	0.147463
GO_REGULATION_OF_SMALL_MOLECULE_METABOLIC_PROCESS	-0.373435	0.0421941	0.149819
GO_LEUKOCYTE_MIGRATION	-0.302578	0.0196507	0.151779
GO_NEGATIVE_REGULATION_OF_DEVELOPMENTAL_PROCESS	-0.285087	0.0198676	0.15337
GO_RESPONSE_TO_MOLECULE_OF_BACTERIAL_ORIGIN	-0.312283	0.0294737	0.155287
GO_REGULATION_OF_INFLAMMATORY_RESPONSE	-0.31921	0.025641	0.149745
GO_MYELOID_LEUKOCYTE_DIFFERENTIATION	-0.365304	0.0386266	0.151947
GO_RAS_PROTEIN_SIGNAL_TRANSDUCTION	-0.408011	0.034188	0.153263
GO_REGULATION_OF_LEUKOCYTE_DIFFERENTIATION	-0.345351	0.0347072	0.154223
GO_REGULATION_OF_PHOSPHORUS_METABOLIC_PROCESS	-0.234655	0.0176211	0.155429
GO_POSITIVE_REGULATION_OF_LEUKOCYTE_MIGRATION	-0.393614	0.0411523	0.15615
GO_MOLECULAR_TRANSDUCER_ACTIVITY	-0.3091	0.0300926	0.158894
GO_PROTEIN_KINASE_B_SIGNALING	-0.381039	0.039823	0.163427
GO_RECEPTOR_MEDIATED_ENDOCYTOSIS	-0.380842	0.0387931	0.164518
GO_ADAPTIVE_IMMUNE_RESPONSE	-0.316652	0.039501	0.171678
GO_DEFENSE_RESPONSE	-0.217568	0.0234192	0.17233
GO_NEGATIVE_REGULATION_OF_IMMUNE_SYSTEM_PROCESS	-0.311089	0.0334029	0.174625
GO_POSITIVE_REGULATION_OF_PROTEIN_SERINE_THREONINE_KINASE_ACTIVITY	-0.347078	0.0438413	0.175378
GO_OXIDOREDUCTASE_ACTIVITY	-0.339629	0.0455531	0.177393
GO_CELL_MOTILITY	-0.229069	0.0299786	0.17982
GO_REGULATION_OF_PROTEIN_SERINE_THREONINE_KINASE_ACTIVITY	-0.313841	0.0414079	0.182921
GO_RESPONSE_TO_BIOTIC_STIMULUS	-0.209341	0.0235294	0.185
GO_DRUG_METABOLIC_PROCESS	-0.353539	0.0400891	0.186226
GO_MULTI_ORGANISM_REPRODUCTIVE_PROCESS	-0.363311	0.0404858	0.187515
GO_REGULATION_OF_PROTEIN_MODIFICATION_PROCESS	-0.219075	0.0331754	0.215789
GO_PROTEIN_PHOSPHORYLATION	-0.214793	0.0392157	0.219526
GO_REGULATION_OF_MULTI_ORGANISM_PROCESS	-0.242071	0.0510638	0.227737
GO_CELL_SURFACE	-0.277904	0.0701357	0.231477
GO_PEPTIDYL_TYROSINE_MODIFICATION	-0.360919	0.0660981	0.234883
GO_POSITIVE_REGULATION_OF_RESPONSE_TO_EXTERNAL_STIMULUS	-0.268403	0.0683962	0.235841
GO_REGULATION_OF_PEPTIDYL_TYROSINE_PHOSPHORYLATION	-0.360919	0.101512	0.238773
GO_TUBE_DEVELOPMENT	-0.25456	0.0709534	0.238775
GO_REGULATION_OF_MYELOID_CELL_DIFFERENTIATION	-0.327965	0.0669546	0.239355
GO_LOCOMOTION	-0.209422	0.0369565	0.239957
GO_POSITIVE_REGULATION_OF_GTPASE_ACTIVITY	-0.364022	0.0610022	0.240447
GO_REGULATION_OF_IMMUNE_RESPONSE	-0.22298	0.0307329	0.246475
GO_NEGATIVE_REGULATION_OF_CELL_POPULATION_PROLIFERATION	-0.275848	0.0800866	0.251858
GO_POSITIVE_REGULATION_OF_PROTEOLYSIS	-0.321537	0.0864745	0.253668
GO_SMALL_GTPASE_MEDIATED_SIGNAL_TRANSDUCTION	-0.321105	0.0759494	0.254957
GO_ENTRY_INTO_HOST	-0.358552	0.0899358	0.255242
GO_NEGATIVE_REGULATION_OF_MULTICELLULAR_ORGANISMAL_PROCESS	-0.227217	0.0613636	0.256471
GO_REGULATION_OF_INTRACELLULAR_SIGNAL_TRANSDUCTION	-0.208144	0.0368664	0.258617
GO_POSITIVE_REGULATION_OF_CYTOKINE_PRODUCTION	-0.289546	0.0842333	0.260453
GO_ANTIGEN_PROCESSING_AND_PRESENTATION	-0.320678	0.095723	0.261876
GO_PROTEASOMAL_PROTEIN_CATABOLIC_PROCESS	-0.333282	0.105495	0.264218
GO_CELLULAR_COMPONENT_DISASSEMBLY	-0.298975	0.0957447	0.264549
GO_CELLULAR_RESPONSE_TO_BIOTIC_STIMULUS	-0.300409	0.106029	0.28791
GO_RESPONSE_TO_NITROGEN_COMPOUND	-0.217156	0.0849057	0.294313
GO_ENZYME_ACTIVATOR_ACTIVITY	-0.278163	0.109053	0.295594
GO_REGULATION_OF_CELL_ACTIVATION	-0.250754	0.0970464	0.296117
GO_EPITHELIAL_CELL_PROLIFERATION	-0.303691	0.125265	0.296192
GO_VESICLE_MEMBRANE	-0.250969	0.109649	0.297173
GO_REGULATION_OF_PROTEOLYSIS	-0.251812	0.108225	0.305797
GO_POSITIVE_REGULATION_OF_CELL_DIFFERENTIATION	-0.220284	0.0933333	0.306844
GO_POSITIVE_REGULATION_OF_IMMUNE_EFFECTOR_PROCESS	-0.318629	0.123377	0.307727
GO_REGULATION_OF_GTPASE_ACTIVITY	-0.324334	0.11479	0.308733
GO_POSITIVE_REGULATION_OF_MULTI_ORGANISM_PROCESS	-0.256625	0.128755	0.309121
GO_TUMOR_NECROSIS_FACTOR_SUPERFAMILY_CYTOKINE_PRODUCTION	-0.331512	0.11588	0.312946
GO_POSITIVE_REGULATION_OF_HEMOPOIESIS	-0.326931	0.127119	0.317657
GO_MYELOID_CELL_DIFFERENTIATION	-0.259725	0.114719	0.319454
GO_ENZYME_REGULATOR_ACTIVITY	-0.2241	0.109677	0.321269
GO_LEUKOCYTE_DIFFERENTIATION	-0.236278	0.122581	0.321451
GO_POSITIVE_REGULATION_OF_DEVELOPMENTAL_PROCESS	-0.197311	0.11086	0.325619
GO_RESPONSE_TO_WOUNDING	-0.242161	0.103814	0.326376
GO_RESPONSE_TO_EXTRACELLULAR_STIMULUS	-0.268735	0.144144	0.337491
GO_INNATE_IMMUNE_RESPONSE	-0.202628	0.126147	0.341159
GO_REGULATION_OF_BINDING	-0.282122	0.13617	0.343658
GO_REGULATION_OF_TRANSFERASE_ACTIVITY	-0.229587	0.153173	0.357258
GO_BLOOD_VESSEL_MORPHOGENESIS	-0.23821	0.169197	0.358007
GO_RESPONSE_TO_BACTERIUM	-0.220344	0.134703	0.359163
GO_ENDOCYTOSIS	-0.231082	0.152809	0.36
GO_CELL	-0.200101	0.139211	0.3602
GO_REGULATION_OF_PEPTIDE_SECRETION	-0.253742	0.149533	0.360252
GO_PEPTIDE_SECRETION	-0.238598	0.16	0.360728
GO_LIPID_BINDING	-0.256829	0.150463	0.360837
GO_SMALL_MOLECULE_BIOSYNTHETIC_PROCESS	-0.280867	0.150655	0.361072
GO_BEHAVIOR	-0.304451	0.162162	0.361258
GO_POSITIVE_REGULATION_OF_CELL_ACTIVATION	-0.272956	0.166316	0.362115
GO_REGULATION_OF_KINASE_ACTIVITY	-0.229587	0.167785	0.365181
GO_TUBE_MORPHOGENESIS	-0.225242	0.177243	0.365637
GO_WOUND_HEALING	-0.250649	0.153509	0.366
GO_POSTSYNAPSE	-0.283917	0.180804	0.368496
GO_CARDIOVASCULAR_SYSTEM_DEVELOPMENT	-0.234447	0.153527	0.370772
GO_REGULATION_OF_CELL_DIFFERENTIATION	-0.1809	0.150327	0.377886
GO_VIRAL_LIFE_CYCLE	-0.252427	0.173729	0.378475
GO_CYTOKINE_PRODUCTION	-0.215726	0.162791	0.381402
GO_LEUKOCYTE_MEDIATED_IMMUNITY	-0.181136	0.150235	0.392473
GO_CELL_CELL_SIGNALING	-0.193204	0.16886	0.395212
GO_REGULATION_OF_DEFENSE_RESPONSE	-0.21773	0.183486	0.396446
GO_POSITIVE_REGULATION_OF_KINASE_ACTIVITY	-0.244065	0.181034	0.396555
GO_ORGANIC_ANION_TRANSPORT	-0.293552	0.178495	0.40101
GO_OXIDATION_REDUCTION_PROCESS	-0.241871	0.20751	0.403403
GO_CELLULAR_RESPONSE_TO_EXTRACELLULAR_STIMULUS	-0.272436	0.189189	0.404629
GO_G_PROTEIN_COUPLED_RECEPTOR_BINDING	-0.273228	0.180617	0.413411
GO_AMEBOIDAL_TYPE_CELL_MIGRATION	-0.282521	0.216667	0.41953
GO_REGULATION_OF_ANATOMICAL_STRUCTURE_MORPHOGENESIS	-0.192332	0.181395	0.419736
GO_METAL_ION_HOMEOSTASIS	-0.2213	0.233261	0.42088
GO_INTERACTION_WITH_HOST	-0.275561	0.194274	0.421093
GO_ENDOPLASMIC_RETICULUM_LUMEN	-0.261705	0.252155	0.421417
GO_TERTIARY_GRANULE	-0.292958	0.259101	0.422529
GO_POSITIVE_REGULATION_OF_CELL_DEVELOPMENT	-0.235119	0.214286	0.422653
GO_POSITIVE_REGULATION_OF_TRANSFERASE_ACTIVITY	-0.232023	0.229979	0.423302
GO_ACTIVATION_OF_PROTEIN_KINASE_ACTIVITY	-0.277637	0.248954	0.424479
GO_POSITIVE_REGULATION_OF_MULTICELLULAR_ORGANISMAL_PROCESS	-0.172345	0.185268	0.425247
GO_IMPORT_INTO_CELL	-0.212977	0.230942	0.426124
GO_CELLULAR_PROTEIN_CATABOLIC_PROCESS	-0.219043	0.230769	0.426448
GO_NEURON_DEATH	-0.250281	0.243363	0.427928
GO_REGULATION_OF_HEMOPOIESIS	-0.217026	0.217759	0.428704
GO_CELL_BODY	-0.251176	0.22833	0.429841
GO_ANTIGEN_PROCESSING_AND_PRESENTATION_OF_PEPTIDE_ANTIGEN	-0.29253	0.230769	0.430949
GO_RESPONSE_TO_OXYGEN_CONTAINING_COMPOUND	-0.169595	0.25054	0.445442
GO_REGULATION_OF_SECRETION	-0.204865	0.260181	0.446987
GO_PHOSPHOLIPID_BINDING	-0.259395	0.255556	0.447203
GO_RESPONSE_TO_LIPID	-0.189757	0.236897	0.447307
GO_DEVELOPMENTAL_GROWTH	-0.247413	0.25885	0.448153
GO_PROTEIN_CATABOLIC_PROCESS	-0.193081	0.260663	0.457319
GO_NEURON_APOPTOTIC_PROCESS	-0.275115	0.268839	0.457711
GO_REGULATION_OF_CELL_DEVELOPMENT	-0.214806	0.269406	0.460077
GO_POSITIVE_REGULATION_OF_NERVOUS_SYSTEM_DEVELOPMENT	-0.242149	0.268344	0.461294
GO_ION_HOMEOSTASIS	-0.197189	0.291391	0.461598
GO_RESPONSE_TO_ENDOGENOUS_STIMULUS	-0.16363	0.219239	0.46252
GO_REGULATION_OF_SYMBIOSIS_ENCOMPASSING_MUTUALISM_THROUGH_PARASITISM	-0.244384	0.278261	0.463054
GO_EXTERNAL_SIDE_OF_PLASMA_MEMBRANE	-0.277542	0.301688	0.465755
GO_NEGATIVE_REGULATION_OF_CELL_DEATH	-0.175517	0.316258	0.466285
GO_REGULATION_OF_NERVOUS_SYSTEM_DEVELOPMENT	-0.211912	0.295218	0.468145
GO_RIBOSE_PHOSPHATE_METABOLIC_PROCESS	-0.26721	0.262834	0.473314
GO_PROTEIN_CONTAINING_COMPLEX_BINDING	-0.178873	0.277293	0.473396
GO_CELLULAR_RESPONSE_TO_OXYGEN_CONTAINING_COMPOUND	-0.169041	0.287059	0.474549
GO_CIRCULATORY_SYSTEM_DEVELOPMENT	-0.191312	0.293982	0.477068
GO_ENDOSOME_MEMBRANE	-0.264236	0.284768	0.478466
GO_CELLULAR_RESPONSE_TO_EXTERNAL_STIMULUS	-0.247088	0.275362	0.490522
GO_REGULATION_OF_PEPTIDASE_ACTIVITY	-0.239016	0.308534	0.497205
GO_SYNAPSE	-0.184994	0.275463	0.499616
GO_MUSCLE_CELL_PROLIFERATION	-0.271555	0.321267	0.502587
GO_ANATOMICAL_STRUCTURE_FORMATION_INVOLVED_IN_MORPHOGENESIS	-0.176914	0.314159	0.513219
GO_NEUROGENESIS	-0.168635	0.323009	0.513695
GO_NERVOUS_SYSTEM_PROCESS	-0.216016	0.344538	0.514549
GO_ORGANONITROGEN_COMPOUND_CATABOLIC_PROCESS	-0.165271	0.308026	0.514875
GO_MITOCHONDRION_ORGANIZATION	-0.237078	0.331276	0.517892
GO_PROTEIN_LOCALIZATION_TO_PLASMA_MEMBRANE	-0.262196	0.354298	0.527466
GO_RESPONSE_TO_TOXIC_SUBSTANCE	-0.221756	0.365591	0.527698
GO_SOMATODENDRITIC_COMPARTMENT	-0.203665	0.352814	0.537745
GO_LEUKOCYTE_PROLIFERATION	-0.224506	0.364606	0.549311
GO_CELLULAR_HOMEOSTASIS	-0.173428	0.361556	0.551968
GO_ENDOSOME	-0.182713	0.395034	0.555389
GO_REGULATION_OF_CELLULAR_CATABOLIC_PROCESS	-0.172873	0.356502	0.557921
GO_NEGATIVE_REGULATION_OF_DEFENSE_RESPONSE	-0.26747	0.385621	0.583414
GO_PROTEIN_LOCALIZATION_TO_CELL_PERIPHERY	-0.250894	0.365751	0.585945
GO_REGULATION_OF_DEVELOPMENTAL_GROWTH	-0.256	0.399142	0.586327
GO_SMALL_MOLECULE_METABOLIC_PROCESS	-0.163489	0.418502	0.587886
GO_REGULATION_OF_CATABOLIC_PROCESS	-0.158955	0.41784	0.588412
GO_REGULATION_OF_PROTEIN_LOCALIZATION	-0.163209	0.458797	0.589453
GO_REGULATION_OF_VESICLE_MEDIATED_TRANSPORT	-0.187325	0.417749	0.589792
GO_CELLULAR_RESPONSE_TO_LIPID	-0.175883	0.433551	0.591514
GO_CARBOHYDRATE_DERIVATIVE_BIOSYNTHETIC_PROCESS	-0.227117	0.420824	0.591732
GO_ENDOCYTIC_VESICLE	-0.229769	0.419355	0.591801
GO_RESPONSE_TO_INORGANIC_SUBSTANCE	-0.225679	0.378495	0.592115
GO_CHEMICAL_HOMEOSTASIS	-0.16773	0.410138	0.594792
GO_REGULATION_OF_RESPONSE_TO_BIOTIC_STIMULUS	-0.205192	0.397408	0.59525
GO_SECRETORY_VESICLE	-0.149776	0.432432	0.596039
GO_POSITIVE_REGULATION_OF_HYDROLASE_ACTIVITY	-0.17648	0.440171	0.596317
GO_TISSUE_MIGRATION	-0.250282	0.423935	0.597076
GO_MUSCLE_STRUCTURE_DEVELOPMENT	-0.222	0.456522	0.597239
GO_REGULATION_OF_ESTABLISHMENT_OF_PROTEIN_LOCALIZATION	-0.170784	0.439175	0.603788
GO_POSITIVE_REGULATION_OF_PEPTIDE_SECRETION	-0.216178	0.467775	0.604411
GO_POSITIVE_REGULATION_OF_SECRETION	-0.196859	0.461378	0.606421
GO_ANION_TRANSPORT	-0.218188	0.462754	0.607319
GO_POSITIVE_REGULATION_OF_BINDING	-0.253019	0.466245	0.607971
GO_RESPONSE_TO_METAL_ION	-0.251779	0.449309	0.608456
GO_NEGATIVE_REGULATION_OF_CYTOKINE_PRODUCTION	-0.2476	0.445175	0.608595
GO_REGULATION_OF_NEURON_DIFFERENTIATION	-0.218556	0.442553	0.60869
GO_RESPONSE_TO_OXIDATIVE_STRESS	-0.207975	0.458333	0.618737
GO_NEGATIVE_REGULATION_OF_BIOSYNTHETIC_PROCESS	-0.158283	0.507527	0.618966
GO_WHOLE_MEMBRANE	-0.135852	0.497872	0.62019
GO_ATP_METABOLIC_PROCESS	-0.233295	0.486842	0.622578
GO_ENZYME_LINKED_RECEPTOR_PROTEIN_SIGNALING_PATHWAY	-0.164488	0.467562	0.623099
GO_REGULATION_OF_CELL_DEATH	-0.131998	0.524887	0.631071
GO_POSITIVE_REGULATION_OF_VASCULATURE_DEVELOPMENT	-0.241896	0.484407	0.643756
GO_SECRETORY_GRANULE	-0.143995	0.513393	0.650154
GO_LIPID_BIOSYNTHETIC_PROCESS	-0.203874	0.531828	0.662614
GO_REGULATION_OF_VASCULATURE_DEVELOPMENT	-0.196898	0.524008	0.663281
GO_CELL_CELL_SIGNALING_BY_WNT	-0.213318	0.521645	0.666334
GO_NEGATIVE_REGULATION_OF_APOPTOTIC_SIGNALING_PATHWAY	-0.210821	0.512088	0.670538
GO_REGULATION_OF_CELL_CYCLE_PROCESS	-0.195946	0.545652	0.670858
GO_RESPONSE_TO_GROWTH_FACTOR	-0.172583	0.525974	0.671324
GO_CELL_SURFACE_RECEPTOR_SIGNALING_PATHWAY_INVOLVED_IN_CELL_CELL_SIGNALING	-0.197878	0.509934	0.671767
GO_REGULATION_OF_RESPONSE_TO_CYTOKINE_STIMULUS	-0.224095	0.569845	0.682323
GO_NEGATIVE_REGULATION_OF_RESPONSE_TO_EXTERNAL_STIMULUS	-0.215163	0.534783	0.683837
GO_REGULATION_OF_PROTEIN_STABILITY	-0.222672	0.560166	0.687061
GO_CENTRAL_NERVOUS_SYSTEM_DEVELOPMENT	-0.167951	0.576017	0.69228
GO_REGULATION_OF_TRANSPORT	-0.123196	0.60793	0.698559
GO_VACUOLAR_MEMBRANE	-0.173371	0.582609	0.722781
GO_NEGATIVE_REGULATION_OF_PROTEIN_METABOLIC_PROCESS	-0.141807	0.645455	0.725031
GO_GLYCOPROTEIN_METABOLIC_PROCESS	-0.212185	0.599557	0.726173
GO_REPRODUCTION	-0.163285	0.606122	0.72764
GO_PURINE_CONTAINING_COMPOUND_METABOLIC_PROCESS	-0.201445	0.577825	0.736218
GO_AXON	-0.18214	0.609562	0.736557
GO_MONOCARBOXYLIC_ACID_METABOLIC_PROCESS	-0.203818	0.610766	0.737937
GO_REGULATION_OF_CELLULAR_AMIDE_METABOLIC_PROCESS	-0.176373	0.632444	0.750607
GO_INORGANIC_ION_TRANSMEMBRANE_TRANSPORT	-0.182527	0.653277	0.75352
GO_POSITIVE_REGULATION_OF_ESTABLISHMENT_OF_PROTEIN_LOCALIZATION	-0.159908	0.663848	0.763094
GO_ORGANIC_ACID_METABOLIC_PROCESS	-0.158098	0.664502	0.766113
GO_REGULATION_OF_REACTIVE_OXYGEN_SPECIES_METABOLIC_PROCESS	-0.203091	0.639309	0.768904
GO_REGULATION_OF_CELL_SHAPE	-0.205563	0.653846	0.770664
GO_NEURON_DEVELOPMENT	-0.150651	0.69526	0.787716
GO_CELLULAR_RESPONSE_TO_PEPTIDE	-0.178535	0.671642	0.793893
GO_POSITIVE_REGULATION_OF_INTRACELLULAR_TRANSPORT	-0.195086	0.719828	0.815405
GO_NUCLEOBASE_CONTAINING_SMALL_MOLECULE_METABOLIC_PROCESS	-0.168629	0.732609	0.816551
GO_POST_TRANSLATIONAL_PROTEIN_MODIFICATION	-0.179945	0.742268	0.821088
GO_REGULATION_OF_CELL_PROJECTION_ORGANIZATION	-0.157523	0.754386	0.827732
GO_REGULATION_OF_TRANSMEMBRANE_TRANSPORT	-0.161961	0.709746	0.828405
GO_CIRCULATORY_SYSTEM_PROCESS	-0.178918	0.738956	0.830069
GO_RESPONSE_TO_PEPTIDE	-0.161036	0.746269	0.840485
GO_NEGATIVE_REGULATION_OF_CELLULAR_CATABOLIC_PROCESS	-0.177942	0.766884	0.861376
GO_NEGATIVE_REGULATION_OF_CELLULAR_COMPONENT_ORGANIZATION	-0.142286	0.795506	0.862845
GO_NEGATIVE_REGULATION_OF_SIGNALING	-0.113517	0.803922	0.864696
GO_GOLGI_MEMBRANE	-0.157039	0.791845	0.865127
GO_STRESS_ACTIVATED_PROTEIN_KINASE_SIGNALING_CASCADE	-0.183914	0.794492	0.867817
GO_NEGATIVE_REGULATION_OF_PHOSPHORYLATION	-0.152309	0.805439	0.871635
GO_ORGANOPHOSPHATE_METABOLIC_PROCESS	-0.122364	0.815451	0.886976
GO_REGULATION_OF_MITOTIC_CELL_CYCLE	-0.157252	0.839207	0.88875
GO_DENDRITIC_TREE	-0.146163	0.836364	0.891788
GO_REGULATION_OF_ION_TRANSMEMBRANE_TRANSPORT	-0.175777	0.84322	0.896887
GO_REGULATION_OF_CELL_MORPHOGENESIS	-0.142537	0.866812	0.902919
GO_EMBRYO_DEVELOPMENT_ENDING_IN_BIRTH_OR_EGG_HATCHING	-0.159109	0.839357	0.9042
GO_ENDOPLASMIC_RETICULUM	-0.10553	0.875	0.904319
GO_PROTEOLYSIS	-0.10307	0.888646	0.906029
GO_POSITIVE_REGULATION_OF_SUPRAMOLECULAR_FIBER_ORGANIZATION	-0.169393	0.877339	0.906771
GO_REGULATION_OF_NEURON_PROJECTION_DEVELOPMENT	-0.160152	0.861996	0.908037
GO_REGULATION_OF_SYSTEM_PROCESS	-0.129305	0.866242	0.914792
GO_NEGATIVE_REGULATION_OF_TRANSPORT	-0.132211	0.891593	0.920924
GO_SYNAPTIC_SIGNALING	-0.146748	0.88668	0.927652
GO_POSITIVE_REGULATION_OF_CELL_PROJECTION_ORGANIZATION	-0.139903	0.90982	0.941734
GO_NEGATIVE_REGULATION_OF_PHOSPHORUS_METABOLIC_PROCESS	-0.12038	0.91886	0.94182
GO_NEGATIVE_REGULATION_OF_HYDROLASE_ACTIVITY	-0.144427	0.92053	0.944462
GO_CELLULAR_RESPONSE_TO_HORMONE_STIMULUS	-0.108071	0.93911	0.94906
GO_ESTABLISHMENT_OF_LOCALIZATION_IN_CELL	-0.130317	0.951681	0.971939
GO_MEMBRANE_PROTEIN_COMPLEX	-0.0992171	0.979036	0.979144
GO_GOLGI_APPARATUS	-0.0703075	0.997717	0.995924
GO_CARBOHYDRATE_METABOLIC_PROCESS	-0.101446	0.989474	0.996714

## Sheet: C0 VS C3
GO UP in C0	ES	NOM p-val	FDR q-val
GO_GLYCOSAMINOGLYCAN_BINDING	0.673802	0	0
GO_HEPARIN_BINDING	0.715073	0	0.000928714
GO_SULFUR_COMPOUND_BINDING	0.660869	0	0.00468566
GO_CELLULAR_RESPONSE_TO_ACID_CHEMICAL	0.608865	0.00296736	0.0840584
GO_RESPONSE_TO_CHEMOKINE	0.623234	0	0.119764
GO_PLATELET_DEGRANULATION	0.550479	0	0.126898
GO_DNA_BINDING_TRANSCRIPTION_ACTIVATOR_ACTIVITY	0.480899	0.00128535	0.164879
GO_RESPONSE_TO_PURINE_CONTAINING_COMPOUND	0.59378	0.00578871	0.16946
GO_EPITHELIAL_CELL_PROLIFERATION	0.456786	0.00263852	0.173284
GO_EPIDERMAL_CELL_DIFFERENTIATION	0.631243	0	0.175417
GO_RESPONSE_TO_CALCIUM_ION	0.565246	0.00143885	0.177212
GO_REGULATION_OF_ERBB_SIGNALING_PATHWAY	0.593352	0.00620155	0.177348
GO_CHEMOKINE_RECEPTOR_BINDING	0.616859	0.00597907	0.177551
GO_REGENERATION	0.550997	0.0027933	0.181069
GO_PLATELET_ALPHA_GRANULE	0.608491	0.00149925	0.181873
GO_EPIDERMIS_DEVELOPMENT	0.566432	0.0058997	0.18366
GO_RESPONSE_TO_ORGANOPHOSPHORUS	0.606636	0.0104322	0.185137
GO_ENDOSOME_MEMBRANE	0.436116	0	0.185232
GO_G_PROTEIN_COUPLED_RECEPTOR_BINDING	0.514934	0.00137174	0.185239
GO_RESPONSE_TO_ACID_CHEMICAL	0.497793	0.00707214	0.185966
GO_ERBB_SIGNALING_PATHWAY	0.55441	0.00721501	0.187231
GO_RECEPTOR_MEDIATED_ENDOCYTOSIS	0.467348	0.00667557	0.188263
GO_RECEPTOR_REGULATOR_ACTIVITY	0.493655	0.00130548	0.189732
GO_MONOCYTE_CHEMOTAXIS	0.57864	0.00455927	0.189974
GO_VIRAL_GENOME_REPLICATION	0.523052	0.0042796	0.209533
GO_LYMPHOCYTE_MIGRATION	0.535363	0.0142857	0.210869
GO_RESPONSE_TO_INTERLEUKIN_1	0.46899	0.0121622	0.210881
GO_RESPONSE_TO_KETONE	0.504419	0.002886	0.237981
GO_REGULATION_OF_EPITHELIAL_CELL_MIGRATION	0.463068	0.00807537	0.247463
GO_INFLAMMATORY_RESPONSE	0.363051	0	0.259742
GO_GROWTH_FACTOR_BINDING	0.549253	0.0163205	0.269859
GO_POSITIVE_REGULATION_OF_ERK1_AND_ERK2_CASCADE	0.451453	0.00552486	0.316251
GO_AMEBOIDAL_TYPE_CELL_MIGRATION	0.418109	0.00897436	0.319611
GO_LYSOSOMAL_TRANSPORT	0.558899	0.0152439	0.319922
GO_NEUTROPHIL_MIGRATION	0.48288	0.015493	0.323858
GO_DNA_BINDING_TRANSCRIPTION_FACTOR_ACTIVITY_RNA_POLYMERASE_II_SPECIFIC	0.379108	0.00483092	0.324588
GO_REGULATION_OF_PLASMA_LIPOPROTEIN_PARTICLE_LEVELS	0.534178	0.0224215	0.325338
GO_POSITIVE_REGULATION_OF_EPITHELIAL_CELL_MIGRATION	0.506938	0.0153631	0.326966
GO_ERK1_AND_ERK2_CASCADE	0.417399	0.00512821	0.3273
GO_MONONUCLEAR_CELL_MIGRATION	0.495266	0.0097493	0.33112
GO_REGULATION_OF_ENDOTHELIAL_CELL_MIGRATION	0.509566	0.0217077	0.335023
GO_REGULATION_OF_CARBOHYDRATE_METABOLIC_PROCESS	0.547677	0.0195195	0.339654
GO_LEUKOCYTE_CHEMOTAXIS	0.419154	0.010568	0.343968
GO_EPITHELIAL_CELL_DIFFERENTIATION	0.394449	0.00639386	0.346883
GO_RESPONSE_TO_INTERFERON_GAMMA	0.406517	0.0132626	0.361389
GO_BLOOD_VESSEL_MORPHOGENESIS	0.360738	0.00868486	0.375968
GO_IMPORT_INTO_CELL	0.355179	0.00827423	0.378754
GO_RESPONSE_TO_METAL_ION	0.414026	0.0254351	0.379819
GO_VACUOLAR_TRANSPORT	0.503731	0.0226929	0.380545
GO_BLOOD_MICROPARTICLE	0.527748	0.0317919	0.382521
GO_ENDOCYTOSIS	0.364267	0.00723764	0.382844
GO_CYTOKINE_ACTIVITY	0.471824	0.0194175	0.384227
GO_RECYCLING_ENDOSOME	0.468312	0.0260116	0.384346
GO_SKIN_DEVELOPMENT	0.528651	0.0251177	0.384809
GO_CALCIUM_ION_BINDING	0.400986	0.0127389	0.385523
GO_COLLAGEN_CONTAINING_EXTRACELLULAR_MATRIX	0.419807	0.0198676	0.386335
GO_RESPONSE_TO_HYDROGEN_PEROXIDE	0.501038	0.0226244	0.388839
GO_ENDOPLASMIC_RETICULUM_LUMEN	0.41998	0.0269179	0.39108
GO_CARDIOVASCULAR_SYSTEM_DEVELOPMENT	0.356546	0.00470588	0.395221
GO_RESPONSE_TO_ENDOPLASMIC_RETICULUM_STRESS	0.413468	0.0408163	0.397923
GO_REGULATION_OF_REPRODUCTIVE_PROCESS	0.527251	0.0346908	0.399099
GO_ORGANIC_HYDROXY_COMPOUND_METABOLIC_PROCESS	0.418505	0.0264201	0.402567
GO_RESPONSE_TO_TUMOR_NECROSIS_FACTOR	0.395276	0.0182292	0.405473
GO_DOUBLE_STRANDED_DNA_BINDING	0.357363	0.0203349	0.409703
GO_NEGATIVE_REGULATION_OF_VIRAL_PROCESS	0.52236	0.0366972	0.410154
GO_RESPONSE_TO_CYTOKINE	0.315404	0.00107991	0.410371
GO_TISSUE_MIGRATION	0.401414	0.0296896	0.413403
GO_MESENCHYMAL_CELL_DIFFERENTIATION	0.416299	0.04426	0.414952
GO_ENDOSOMAL_TRANSPORT	0.410678	0.0456376	0.415133
GO_GRANULOCYTE_MIGRATION	0.443365	0.0318841	0.415577
GO_REGULATION_OF_CELL_POPULATION_PROLIFERATION	0.315408	0.00109529	0.415994
GO_REGULATION_OF_VIRAL_GENOME_REPLICATION	0.512472	0.0443131	0.416791
GO_CELLULAR_RESPONSE_TO_ANTIBIOTIC	0.495305	0.0401786	0.416889
GO_NEGATIVE_REGULATION_OF_MULTI_ORGANISM_PROCESS	0.440807	0.0331034	0.417786
GO_INOSITOL_LIPID_MEDIATED_SIGNALING	0.44828	0.0442857	0.417824
GO_ENDOPEPTIDASE_REGULATOR_ACTIVITY	0.467902	0.0420757	0.418799
GO_EXTRACELLULAR_MATRIX	0.39132	0.0297927	0.420122
GO_MULTICELLULAR_ORGANISM_GROWTH	0.47999	0.0368189	0.420199
GO_CELLULAR_RESPONSE_TO_NITROGEN_COMPOUND	0.34272	0.0165485	0.420649
GO_AXON_DEVELOPMENT	0.391411	0.0241611	0.421262
GO_HUMORAL_IMMUNE_RESPONSE	0.446475	0.038961	0.422676
GO_ANATOMICAL_STRUCTURE_MATURATION	0.526261	0.0379363	0.423013
GO_ENDOSOME	0.322412	0.0112233	0.423167
GO_PIGMENT_GRANULE	0.419133	0.0497925	0.423174
GO_RESPONSE_TO_INORGANIC_SUBSTANCE	0.365869	0.0217114	0.424687
GO_DNA_BINDING_TRANSCRIPTION_FACTOR_ACTIVITY	0.34854	0.0261283	0.424827
GO_GOLGI_VESICLE_TRANSPORT	0.389357	0.0350649	0.425818
GO_DEFENSE_RESPONSE	0.306219	0.00209864	0.427039
GO_CYTOSOLIC_TRANSPORT	0.451004	0.0453901	0.434664
GO_MYELOID_LEUKOCYTE_MIGRATION	0.385497	0.0337224	0.435557
GO_RESPONSE_TO_ORGANIC_CYCLIC_COMPOUND	0.325693	0.0164127	0.438568
GO_RESPONSE_TO_NITROGEN_COMPOUND	0.316641	0.0101351	0.442748
GO_RESPONSE_TO_CORTICOSTEROID	0.465352	0.0567485	0.443195
GO_NEGATIVE_REGULATION_OF_AUTOPHAGY	0.497371	0.0533537	0.445854
GO_RESPONSE_TO_TYPE_I_INTERFERON	0.475614	0.0600293	0.445892
GO_MESENCHYME_DEVELOPMENT	0.404034	0.0588235	0.44634
GO_POSITIVE_REGULATION_OF_PHAGOCYTOSIS	0.455241	0.0932331	0.447067
GO_RESPONSE_TO_FIBROBLAST_GROWTH_FACTOR	0.45673	0.0576653	0.447715
GO_DEFENSE_RESPONSE_TO_OTHER_ORGANISM	0.30719	0.01	0.449798
GO_METAL_ION_TRANSMEMBRANE_TRANSPORTER_ACTIVITY	0.491719	0.0474074	0.450675
GO_VIRAL_LIFE_CYCLE	0.362927	0.0351562	0.451875
GO_CELLULAR_RESPONSE_TO_INORGANIC_SUBSTANCE	0.4284	0.0604782	0.45307
GO_DEVELOPMENTAL_GROWTH	0.342132	0.0349127	0.453622
GO_CARBOHYDRATE_BINDING	0.450013	0.0516499	0.453622
GO_RESPONSE_TO_BIOTIC_STIMULUS	0.302572	0.00541712	0.453786
GO_LEUKOCYTE_MIGRATION	0.333315	0.0297974	0.454666
GO_REGULATION_OF_VASCULATURE_DEVELOPMENT	0.390819	0.0431849	0.455269
GO_NEGATIVE_REGULATION_OF_PEPTIDASE_ACTIVITY	0.408268	0.0638003	0.456111
GO_SEQUENCE_SPECIFIC_DOUBLE_STRANDED_DNA_BINDING	0.338986	0.02875	0.457362
GO_TRANSMEMBRANE_RECEPTOR_PROTEIN_TYROSINE_KINASE_SIGNALING_PATHWAY	0.32664	0.024362	0.457557
GO_RESPONSE_TO_CARBOHYDRATE	0.421054	0.0516039	0.458855
GO_CYTOKINE_MEDIATED_SIGNALING_PATHWAY	0.308651	0.0191226	0.459067
GO_ENDOTHELIAL_CELL_PROLIFERATION	0.478724	0.0556391	0.461657
GO_MEMBRANE_REGION	0.370878	0.0572917	0.461858
GO_GLAND_MORPHOGENESIS	0.47502	0.0735294	0.464158
GO_REGULATION_OF_NEURON_DIFFERENTIATION	0.362969	0.045045	0.464658
GO_PEPTIDASE_REGULATOR_ACTIVITY	0.420668	0.0749646	0.464807
GO_POSITIVE_REGULATION_OF_GTPASE_ACTIVITY	0.365335	0.0592686	0.465759
GO_SIGNALING_RECEPTOR_BINDING	0.301046	0.00986842	0.467198
GO_REGULATION_OF_EXOCYTOSIS	0.42234	0.0726496	0.469582
GO_VASCULAR_PROCESS_IN_CIRCULATORY_SYSTEM	0.464722	0.066474	0.472569
GO_RESPONSE_TO_ANTIBIOTIC	0.369968	0.0540541	0.477592
GO_ENDOPLASMIC_RETICULUM_UNFOLDED_PROTEIN_RESPONSE	0.448188	0.0824742	0.478936
GO_REGULATION_OF_DNA_TEMPLATED_TRANSCRIPTION_IN_RESPONSE_TO_STRESS	0.401422	0.0974212	0.479575
GO_WHOLE_MEMBRANE	0.282689	0.00738397	0.480152
GO_RESPONSE_TO_STARVATION	0.450617	0.0681159	0.480992
GO_RESPONSE_TO_LEUKEMIA_INHIBITORY_FACTOR	0.470846	0.0828221	0.481922
GO_POSITIVE_REGULATION_OF_MAPK_CASCADE	0.332996	0.0472255	0.482701
GO_CIRCULATORY_SYSTEM_DEVELOPMENT	0.307432	0.0319635	0.48309
GO_TUBE_MORPHOGENESIS	0.309741	0.0357143	0.483136
GO_TUBE_DEVELOPMENT	0.309101	0.036215	0.483739
GO_CONNECTIVE_TISSUE_DEVELOPMENT	0.392679	0.0835509	0.485264
GO_ENTRY_INTO_HOST	0.41003	0.0705036	0.486
GO_ANATOMICAL_STRUCTURE_FORMATION_INVOLVED_IN_MORPHOGENESIS	0.305097	0.0309156	0.486107
GO_CELL_CHEMOTAXIS	0.348064	0.0505837	0.486258
GO_CHROMATIN	0.32165	0.0323741	0.48657
GO_POSITIVE_REGULATION_OF_MUSCLE_CELL_DIFFERENTIATION	0.482749	0.0995261	0.488235
GO_MOLECULAR_FUNCTION_REGULATOR	0.289183	0.0152672	0.488413
GO_EPIDERMAL_GROWTH_FACTOR_RECEPTOR_SIGNALING_PATHWAY	0.482866	0.0903704	0.488501
GO_REGULATION_OF_ANATOMICAL_STRUCTURE_MORPHOGENESIS	0.298364	0.0283447	0.489396
GO_CELLULAR_RESPONSE_TO_TOPOLOGICALLY_INCORRECT_PROTEIN	0.426487	0.09299	0.489501
GO_ALPHA_BETA_T_CELL_DIFFERENTIATION	0.472081	0.0852713	0.490272
GO_POSITIVE_REGULATION_OF_PHOSPHORUS_METABOLIC_PROCESS	0.300527	0.0261067	0.491212
GO_REGULATION_OF_MAPK_CASCADE	0.313923	0.0330189	0.491806
GO_INNATE_IMMUNE_RESPONSE	0.295409	0.0268156	0.495538
GO_VESICLE_LUMEN	0.329983	0.0613811	0.500038
GO_ENDOTHELIAL_CELL_MIGRATION	0.402979	0.0969609	0.500827
GO_INTERACTION_WITH_SYMBIONT	0.439898	0.0873925	0.501761
GO_POTASSIUM_ION_TRANSPORT	0.464809	0.0896861	0.505138
GO_RESPONSE_TO_REACTIVE_OXYGEN_SPECIES	0.386859	0.0788382	0.505643
GO_CYTOKINE_RECEPTOR_BINDING	0.369668	0.0853333	0.506533
GO_POSITIVE_REGULATION_OF_DEVELOPMENTAL_PROCESS	0.289932	0.0344062	0.506725
GO_CELLULAR_RESPONSE_TO_OXYGEN_CONTAINING_COMPOUND	0.292754	0.0398671	0.508255
GO_POSITIVE_REGULATION_OF_TRANSCRIPTION_BY_RNA_POLYMERASE_II	0.301939	0.0521945	0.508527
GO_AMIDE_BINDING	0.38888	0.0875706	0.508695
GO_STEM_CELL_DIFFERENTIATION	0.383737	0.0915493	0.509243
GO_CELLULAR_RESPONSE_TO_DRUG	0.342465	0.0849673	0.51505
GO_POST_GOLGI_VESICLE_MEDIATED_TRANSPORT	0.454554	0.100904	0.525445
GO_CELLULAR_RESPONSE_TO_CARBOHYDRATE_STIMULUS	0.477027	0.0993976	0.525681
GO_ENDOCYTIC_VESICLE_MEMBRANE	0.370762	0.0881972	0.525894
GO_CELLULAR_RESPONSE_TO_TOXIC_SUBSTANCE	0.375942	0.092246	0.526778
GO_REGULATION_OF_VESICLE_MEDIATED_TRANSPORT	0.324155	0.0679012	0.528464
GO_REGULATION_OF_GTPASE_ACTIVITY	0.334032	0.080207	0.528548
GO_TRANS_GOLGI_NETWORK	0.40024	0.116084	0.531588
GO_MODIFICATION_OF_MORPHOLOGY_OR_PHYSIOLOGY_OF_OTHER_ORGANISM_INVOLVED_IN_SYMBIOTIC_INTERACTION	0.421974	0.11994	0.531962
GO_CELL_SURFACE_RECEPTOR_SIGNALING_PATHWAY_INVOLVED_IN_CELL_CELL_SIGNALING	0.321767	0.0694789	0.532453
GO_NEGATIVE_REGULATION_OF_TRANSCRIPTION_BY_RNA_POLYMERASE_II	0.306672	0.0562201	0.533513
GO_RESPONSE_TO_PEPTIDE	0.317161	0.0633374	0.533888
GO_LIPID_BINDING	0.311214	0.0591862	0.534345
GO_POST_TRANSLATIONAL_PROTEIN_MODIFICATION	0.358716	0.101626	0.534873
GO_NEGATIVE_REGULATION_OF_DEVELOPMENTAL_GROWTH	0.466002	0.106707	0.535603
GO_PHOSPHATIDYLINOSITOL_3_KINASE_SIGNALING	0.427089	0.117199	0.536602
GO_POSITIVE_REGULATION_OF_CELL_DIFFERENTIATION	0.293272	0.0466439	0.538763
GO_REGULATION_OF_STRIATED_MUSCLE_CELL_DIFFERENTIATION	0.459837	0.148485	0.539036
GO_RESPONSE_TO_WOUNDING	0.313488	0.067938	0.540421
GO_ENDOCYTIC_VESICLE	0.328154	0.0757021	0.546933
GO_SEQUENCE_SPECIFIC_DNA_BINDING	0.309304	0.0665054	0.553567
GO_LEUKOCYTE_DIFFERENTIATION	0.301191	0.0650118	0.553862
GO_RESPONSE_TO_DRUG	0.292053	0.0516432	0.55657
GO_EARLY_ENDOSOME_MEMBRANE	0.404034	0.118644	0.557349
GO_ENZYME_LINKED_RECEPTOR_PROTEIN_SIGNALING_PATHWAY	0.287246	0.0421893	0.558506
GO_SIGNAL_TRANSDUCTION_BY_PROTEIN_PHOSPHORYLATION	0.28748	0.0443407	0.559016
GO_SMOOTH_MUSCLE_CELL_PROLIFERATION	0.408599	0.117037	0.559714
GO_EXOCYTOSIS	0.273786	0.0566667	0.561811
GO_MUSCLE_CELL_PROLIFERATION	0.368432	0.115922	0.562462
GO_POSITIVE_REGULATION_OF_EPITHELIAL_CELL_PROLIFERATION	0.381876	0.117232	0.562866
GO_FAT_CELL_DIFFERENTIATION	0.389985	0.114894	0.563934
GO_REGULATION_OF_BODY_FLUID_LEVELS	0.331425	0.0922078	0.564528
GO_KINASE_REGULATOR_ACTIVITY	0.379652	0.110473	0.566001
GO_REGULATION_OF_PHOSPHORYLATION	0.272635	0.0365044	0.566714
GO_MYELOID_LEUKOCYTE_DIFFERENTIATION	0.344121	0.105744	0.566721
GO_RESPONSE_TO_BACTERIUM	0.296906	0.0963139	0.567271
GO_NEGATIVE_REGULATION_OF_DEVELOPMENTAL_PROCESS	0.291395	0.0688019	0.56822
GO_REGULATION_OF_CELL_SHAPE	0.379672	0.131285	0.568494
GO_NEGATIVE_REGULATION_OF_BIOSYNTHETIC_PROCESS	0.278977	0.0530474	0.569242
GO_CELLULAR_RESPONSE_TO_ORGANIC_CYCLIC_COMPOUND	0.3178	0.103194	0.569473
GO_CELLULAR_RESPONSE_TO_ENDOGENOUS_STIMULUS	0.272697	0.0482063	0.570183
GO_RESPONSE_TO_OXYGEN_CONTAINING_COMPOUND	0.268777	0.0302376	0.571005
GO_PROTEIN_COMPLEX_OLIGOMERIZATION	0.323149	0.0958549	0.571417
GO_NUCLEAR_TRANSCRIPTION_FACTOR_COMPLEX	0.405146	0.134094	0.574038
GO_TAXIS	0.292226	0.0970414	0.574313
GO_NEGATIVE_REGULATION_OF_RNA_BIOSYNTHETIC_PROCESS	0.288109	0.0694445	0.57519
GO_REGULATION_OF_CELL_DIFFERENTIATION	0.267546	0.0463862	0.577796
GO_RESPONSE_TO_HORMONE	0.28193	0.0870561	0.588438
GO_REGULATION_OF_IMMUNE_EFFECTOR_PROCESS	0.316445	0.105395	0.588615
GO_RESPONSE_TO_MOLECULE_OF_BACTERIAL_ORIGIN	0.307403	0.115291	0.588645
GO_CELLULAR_RESPONSE_TO_STARVATION	0.430678	0.148588	0.589667
GO_CIS_REGULATORY_REGION_BINDING	0.327988	0.105063	0.590075
GO_NEURON_DIFFERENTIATION	0.281908	0.0880282	0.590614
GO_CLATHRIN_COATED_VESICLE_MEMBRANE	0.42045	0.14242	0.590694
GO_ENZYME_INHIBITOR_ACTIVITY	0.33323	0.111257	0.590762
GO_RECYCLING_ENDOSOME_MEMBRANE	0.448228	0.152593	0.592492
GO_VACUOLAR_MEMBRANE	0.30748	0.111817	0.592789
GO_CELLULAR_RESPONSE_TO_LIPID	0.293196	0.118812	0.592818
GO_MAINTENANCE_OF_CELL_NUMBER	0.4191	0.138129	0.593534
GO_REGULATION_OF_PH	0.40506	0.152239	0.593727
GO_DEVELOPMENTAL_GROWTH_INVOLVED_IN_MORPHOGENESIS	0.412656	0.156662	0.594327
GO_POSITIVE_REGULATION_OF_MULTICELLULAR_ORGANISMAL_PROCESS	0.260067	0.0463862	0.594799
GO_ADHERENS_JUNCTION	0.397384	0.135095	0.597931
GO_G_PROTEIN_COUPLED_RECEPTOR_SIGNALING_PATHWAY	0.302169	0.122166	0.599825
GO_REGULATION_OF_PHAGOCYTOSIS	0.38789	0.141618	0.602717
GO_REGULATION_OF_PHOSPHORUS_METABOLIC_PROCESS	0.262493	0.0538462	0.606411
GO_ENZYME_ACTIVATOR_ACTIVITY	0.309755	0.127364	0.612405
GO_RESPONSE_TO_TOPOLOGICALLY_INCORRECT_PROTEIN	0.376744	0.159664	0.613888
GO_POSITIVE_REGULATION_OF_NEURON_DEATH	0.409841	0.164723	0.614475
GO_POSITIVE_REGULATION_OF_PROTEIN_METABOLIC_PROCESS	0.25297	0.0782422	0.614549
GO_SARCOLEMMA	0.426447	0.175115	0.615782
GO_CELLULAR_RESPONSE_TO_BIOTIC_STIMULUS	0.313523	0.132221	0.616166
GO_CELLULAR_RESPONSE_TO_EXTRACELLULAR_STIMULUS	0.344283	0.145975	0.616315
GO_NEGATIVE_REGULATION_OF_CELL_POPULATION_PROLIFERATION	0.297898	0.104478	0.616599
GO_DEVELOPMENTAL_MATURATION	0.383371	0.151734	0.616639
GO_CANONICAL_WNT_SIGNALING_PATHWAY	0.342459	0.151432	0.618063
GO_TEMPERATURE_HOMEOSTASIS	0.369524	0.183731	0.619119
GO_PHOSPHATIDYLINOSITOL_BINDING	0.359405	0.155899	0.61918
GO_INTERACTION_WITH_HOST	0.342923	0.15309	0.619387
GO_POSITIVE_REGULATION_OF_IMMUNE_SYSTEM_PROCESS	0.264424	0.0719823	0.620299
GO_NEGATIVE_REGULATION_OF_NEURON_DIFFERENTIATION	0.377775	0.173134	0.620676
GO_CELL_CELL_JUNCTION	0.321469	0.145995	0.62097
GO_COAGULATION	0.3461	0.14479	0.621225
GO_RESPONSE_TO_MECHANICAL_STIMULUS	0.373509	0.143695	0.621293
GO_RESPONSE_TO_ENDOGENOUS_STIMULUS	0.260775	0.0614035	0.621448
GO_PRIMARY_ACTIVE_TRANSMEMBRANE_TRANSPORTER_ACTIVITY	0.393873	0.175464	0.621524
GO_MONOVALENT_INORGANIC_CATION_HOMEOSTASIS	0.371163	0.176211	0.621531
GO_RESPONSE_TO_NUTRIENT	0.372977	0.191977	0.621553
GO_CELL_CELL_SIGNALING_BY_WNT	0.307646	0.125155	0.622407
GO_METAL_ION_TRANSPORT	0.29858	0.107488	0.622601
GO_NEGATIVE_REGULATION_OF_CELL_CYCLE_PHASE_TRANSITION	0.352187	0.178423	0.624002
GO_REGULATION_OF_DEVELOPMENTAL_GROWTH	0.335599	0.150396	0.624177
GO_POSITIVE_REGULATION_OF_CELL_POPULATION_PROLIFERATION	0.270647	0.106236	0.6245
GO_WOUND_HEALING	0.303005	0.118182	0.625294
GO_RESPONSE_TO_STEROID_HORMONE	0.325442	0.118194	0.625544
GO_REGULATION_OF_HYDROLASE_ACTIVITY	0.268316	0.0885358	0.626385
GO_REGULATION_OF_REGULATED_SECRETORY_PATHWAY	0.409802	0.187307	0.6341
GO_REGULATION_OF_VIRAL_LIFE_CYCLE	0.374107	0.185079	0.634769
GO_NEGATIVE_REGULATION_OF_GROWTH	0.350617	0.180258	0.635346
GO_DEVELOPMENTAL_CELL_GROWTH	0.371532	0.184593	0.63579
GO_CELLULAR_RESPONSE_TO_PEPTIDE	0.292817	0.175219	0.635966
GO_REGULATION_OF_LEUKOCYTE_MIGRATION	0.318462	0.153236	0.636021
GO_POSITIVE_REGULATION_OF_PROTEIN_MODIFICATION_PROCESS	0.261204	0.0959368	0.636157
GO_CELLULAR_RESPONSE_TO_CHEMICAL_STRESS	0.326273	0.15415	0.636178
GO_REGULATION_OF_AUTOPHAGY	0.324538	0.158108	0.636336
GO_GROWTH	0.273032	0.125	0.636386
GO_ENZYME_REGULATOR_ACTIVITY	0.266948	0.117579	0.63648
GO_ZINC_ION_BINDING	0.317762	0.163613	0.636585
GO_CELL_MOTILITY	0.249889	0.0829741	0.63683
GO_CARTILAGE_DEVELOPMENT	0.382326	0.186364	0.636846
GO_CHONDROCYTE_DIFFERENTIATION	0.418928	0.203364	0.636909
GO_DEFENSE_RESPONSE_TO_BACTERIUM	0.359916	0.172702	0.636951
GO_NEURON_DEATH	0.310177	0.166028	0.637071
GO_CELL_CELL_SIGNALING	0.256197	0.110867	0.637271
GO_RESPONSE_TO_LIPID	0.266518	0.125721	0.63731
GO_REGULATION_OF_BLOOD_PRESSURE	0.374616	0.172464	0.638068
GO_LATE_ENDOSOME_MEMBRANE	0.388924	0.171548	0.638152
GO_CELL_FATE_COMMITMENT	0.401137	0.192012	0.638285
GO_NEGATIVE_REGULATION_OF_NUCLEOBASE_CONTAINING_COMPOUND_METABOLIC_PROCESS	0.264095	0.109756	0.638532
GO_NEGATIVE_REGULATION_OF_NEURON_APOPTOTIC_PROCESS	0.386124	0.191265	0.639118
GO_CELLULAR_MODIFIED_AMINO_ACID_METABOLIC_PROCESS	0.402998	0.205128	0.639142
GO_NEURON_DEVELOPMENT	0.276882	0.113609	0.639437
GO_REGULATION_OF_CELL_MATRIX_ADHESION	0.416116	0.190332	0.641209
GO_NUCLEAR_CHROMOSOME	0.278301	0.130539	0.641396
GO_CELLULAR_HOMEOSTASIS	0.270018	0.128293	0.6424
GO_REGULATION_OF_PEPTIDASE_ACTIVITY	0.299653	0.179551	0.644465
GO_GLAND_DEVELOPMENT	0.31295	0.193634	0.646832
GO_CELL_SURFACE	0.276531	0.153302	0.648388
GO_BIOMINERALIZATION	0.387208	0.205052	0.648834
GO_IRON_ION_TRANSPORT	0.418433	0.219697	0.649614
GO_CYTOKINESIS	0.398334	0.203566	0.649976
GO_NON_CANONICAL_WNT_SIGNALING_PATHWAY	0.373282	0.20438	0.651102
GO_ATPASE_COUPLED_ION_TRANSMEMBRANE_TRANSPORTER_ACTIVITY	0.418418	0.211538	0.651154
GO_PROTEIN_KINASE_B_SIGNALING	0.341994	0.186722	0.651479
GO_NEGATIVE_REGULATION_OF_MITOTIC_CELL_CYCLE	0.324603	0.182825	0.652355
GO_ADAPTIVE_THERMOGENESIS	0.375255	0.201794	0.652543
GO_RAB_GTPASE_BINDING	0.390079	0.203216	0.652875
GO_COATED_VESICLE_MEMBRANE	0.361847	0.211816	0.653041
GO_REGULATION_OF_NEURON_PROJECTION_DEVELOPMENT	0.3078	0.194771	0.653456
GO_EPITHELIUM_DEVELOPMENT	0.270277	0.14098	0.653801
GO_POSITIVE_REGULATION_OF_LEUKOCYTE_DIFFERENTIATION	0.342906	0.211949	0.655888
GO_SMALL_GTPASE_MEDIATED_SIGNAL_TRANSDUCTION	0.279369	0.177804	0.656746
GO_CLATHRIN_COATED_VESICLE	0.365277	0.213881	0.657065
GO_REGULATION_OF_RESPONSE_TO_EXTERNAL_STIMULUS	0.25098	0.131783	0.658247
GO_CELLULAR_RESPONSE_TO_OXYGEN_LEVELS	0.314329	0.203947	0.658303
GO_TRANSCRIPTION_REGULATOR_ACTIVITY	0.264332	0.164912	0.660467
GO_POSITIVE_REGULATION_OF_HYDROLASE_ACTIVITY	0.273258	0.173603	0.663035
GO_EXTERNAL_SIDE_OF_PLASMA_MEMBRANE	0.336317	0.215343	0.669031
GO_MODIFICATION_OF_MORPHOLOGY_OR_PHYSIOLOGY_OF_OTHER_ORGANISM	0.35861	0.233286	0.669681
GO_ALCOHOL_METABOLIC_PROCESS	0.357022	0.233803	0.671275
GO_MEMBRANE_ORGANIZATION	0.258349	0.172695	0.673995
GO_REGULATION_OF_SYSTEM_PROCESS	0.29903	0.215506	0.674
GO_PROTEIN_HOMODIMERIZATION_ACTIVITY	0.276831	0.175971	0.674526
GO_NEURON_PROJECTION_GUIDANCE	0.340207	0.210744	0.675065
GO_PROTEIN_HOMOOLIGOMERIZATION	0.326641	0.19837	0.67512
GO_CELLULAR_GLUCOSE_HOMEOSTASIS	0.398815	0.229457	0.67521
GO_REGULATION_OF_PHOSPHATIDYLINOSITOL_3_KINASE_SIGNALING	0.378947	0.246827	0.675314
GO_REGULATION_OF_MUSCLE_SYSTEM_PROCESS	0.335825	0.21751	0.675417
GO_CYCLIC_NUCLEOTIDE_MEDIATED_SIGNALING	0.38481	0.226804	0.675553
GO_SENSORY_SYSTEM_DEVELOPMENT	0.335498	0.238095	0.675582
GO_PHOSPHOLIPID_BINDING	0.291106	0.210106	0.675606
GO_NEGATIVE_REGULATION_OF_MOLECULAR_FUNCTION	0.251126	0.167824	0.676173
GO_REGULATION_OF_IMMUNE_SYSTEM_PROCESS	0.237352	0.14738	0.676176
GO_DIVALENT_INORGANIC_CATION_TRANSPORT	0.303608	0.209699	0.676433
GO_POSITIVE_REGULATION_OF_INTRACELLULAR_SIGNAL_TRANSDUCTION	0.246692	0.164246	0.676638
GO_NEGATIVE_REGULATION_OF_RESPONSE_TO_EXTERNAL_STIMULUS	0.302942	0.224806	0.677131
GO_REGULATION_OF_EPITHELIAL_CELL_DIFFERENTIATION	0.387028	0.228571	0.677729
GO_REGULATION_OF_RESPONSE_TO_WOUNDING	0.364667	0.240741	0.677944
GO_REGULATORY_REGION_NUCLEIC_ACID_BINDING	0.274324	0.182482	0.678179
GO_ORGANELLE_SUBCOMPARTMENT	0.30576	0.215241	0.678315
GO_CELL_PROJECTION_ORGANIZATION	0.254413	0.174312	0.678412
GO_ION_TRANSPORT	0.247339	0.149033	0.678666
GO_NEGATIVE_REGULATION_OF_CELL_CYCLE_G1_S_PHASE_TRANSITION	0.407615	0.24924	0.679025
GO_POSITIVE_REGULATION_OF_IMMUNE_EFFECTOR_PROCESS	0.323772	0.219086	0.679086
GO_RESPONSE_TO_ABIOTIC_STIMULUS	0.245329	0.178005	0.679284
GO_MYELOID_CELL_DIFFERENTIATION	0.287087	0.200483	0.679794
GO_UROGENITAL_SYSTEM_DEVELOPMENT	0.351156	0.232687	0.680627
GO_REGULATION_OF_DNA_BINDING	0.386616	0.251135	0.680882
GO_CELL	0.25281	0.172414	0.681608
GO_CELL_KILLING	0.36874	0.248882	0.681828
GO_SMALL_MOLECULE_BIOSYNTHETIC_PROCESS	0.283477	0.225282	0.682015
GO_RESPONSE_TO_VIRUS	0.302723	0.213924	0.683349
GO_CELLULAR_RESPONSE_TO_ABIOTIC_STIMULUS	0.322906	0.228883	0.683748
GO_ALPHA_BETA_T_CELL_ACTIVATION	0.353836	0.251076	0.685101
GO_CHROMATIN_BINDING	0.299437	0.256579	0.690914
GO_PEPTIDE_BINDING	0.332314	0.243056	0.691289
GO_CHEMICAL_HOMEOSTASIS	0.2481	0.218351	0.691705
GO_AGING	0.30206	0.24349	0.691859
GO_MULTICELLULAR_ORGANISMAL_HOMEOSTASIS	0.291949	0.242877	0.6921
GO_GENE_SILENCING_BY_RNA	0.385726	0.270833	0.692579
GO_HEART_DEVELOPMENT	0.273074	0.243934	0.692925
GO_RESPONSE_TO_EXTRACELLULAR_STIMULUS	0.280754	0.2299	0.693121
GO_NEGATIVE_REGULATION_OF_CATALYTIC_ACTIVITY	0.262943	0.227986	0.693528
GO_POSITIVE_REGULATION_OF_CATALYTIC_ACTIVITY	0.240478	0.177455	0.693532
GO_PROTEIN_LOCALIZATION_TO_PLASMA_MEMBRANE	0.306048	0.267366	0.694039
GO_IMMUNE_SYSTEM_DEVELOPMENT	0.242936	0.187569	0.694267
GO_REGULATION_OF_LEUKOCYTE_CHEMOTAXIS	0.324979	0.256516	0.694383
GO_PROCESS_UTILIZING_AUTOPHAGIC_MECHANISM	0.280928	0.223363	0.69447
GO_LOCOMOTION	0.229862	0.179848	0.694663
GO_EXTRINSIC_APOPTOTIC_SIGNALING_PATHWAY	0.335904	0.221277	0.694814
GO_CELLULAR_COMPONENT_MORPHOGENESIS	0.253628	0.201632	0.694984
GO_NEGATIVE_REGULATION_OF_HYDROLASE_ACTIVITY	0.287922	0.257143	0.695017
GO_POSITIVE_REGULATION_OF_COLD_INDUCED_THERMOGENESIS	0.389674	0.271057	0.695187
GO_CELLULAR_DETOXIFICATION	0.370063	0.27957	0.695334
GO_CYTOKINE_METABOLIC_PROCESS	0.345147	0.257554	0.695514
GO_FIBROBLAST_PROLIFERATION	0.358942	0.266376	0.695532
GO_OSTEOCLAST_DIFFERENTIATION	0.357073	0.283804	0.695553
GO_INTERLEUKIN_6_PRODUCTION	0.328312	0.254768	0.695571
GO_LYMPHOCYTE_DIFFERENTIATION	0.281757	0.219922	0.695967
GO_MUSCLE_STRUCTURE_DEVELOPMENT	0.269117	0.232927	0.695993
GO_AXON	0.281423	0.265045	0.696026
GO_REGULATION_OF_FAT_CELL_DIFFERENTIATION	0.382543	0.276471	0.696244
GO_REGULATION_OF_CELLULAR_COMPONENT_MOVEMENT	0.239316	0.199776	0.696245
GO_NEGATIVE_REGULATION_OF_PROTEOLYSIS	0.290608	0.261559	0.696593
GO_POSITIVE_REGULATION_OF_SMOOTH_MUSCLE_CELL_PROLIFERATION	0.380907	0.269289	0.696636
GO_MUSCLE_CELL_DIFFERENTIATION	0.310784	0.258287	0.696761
GO_ENDOMEMBRANE_SYSTEM_ORGANIZATION	0.299253	0.257516	0.696761
GO_REGULATION_OF_EXTRINSIC_APOPTOTIC_SIGNALING_PATHWAY	0.352585	0.245014	0.697033
GO_RESPONSE_TO_OXIDATIVE_STRESS	0.282803	0.235955	0.69709
GO_ION_HOMEOSTASIS	0.25299	0.235928	0.69749
GO_CELLULAR_CARBOHYDRATE_METABOLIC_PROCESS	0.363876	0.28763	0.697573
GO_NEGATIVE_REGULATION_OF_MULTICELLULAR_ORGANISMAL_PROCESS	0.245208	0.182333	0.697678
GO_DEFENSE_RESPONSE_TO_VIRUS	0.334081	0.24858	0.697983
GO_REGULATION_OF_PROTEIN_MODIFICATION_PROCESS	0.22845	0.200637	0.698566
GO_PHOSPHOPROTEIN_PHOSPHATASE_ACTIVITY	0.357254	0.292285	0.698848
GO_ANTIGEN_PROCESSING_AND_PRESENTATION_OF_PEPTIDE_OR_POLYSACCHARIDE_ANTIGEN_VIA_MHC_CLASS_II	0.361691	0.273425	0.698956
GO_REGULATION_OF_MUSCLE_ORGAN_DEVELOPMENT	0.36874	0.294891	0.699207
GO_RECEPTOR_METABOLIC_PROCESS	0.316433	0.27894	0.699236
GO_SECRETION	0.223182	0.186422	0.700387
GO_REGULATION_OF_ANATOMICAL_STRUCTURE_SIZE	0.269816	0.282338	0.700429
GO_POSITIVE_REGULATION_OF_NEURON_DIFFERENTIATION	0.31902	0.263298	0.700514
GO_PROTEIN_PHOSPHORYLATION	0.229884	0.201081	0.700522
GO_REGULATION_OF_CHEMOTAXIS	0.299194	0.27248	0.700589
GO_NEGATIVE_REGULATION_OF_CYSTEINE_TYPE_ENDOPEPTIDASE_ACTIVITY	0.384388	0.288288	0.700895
GO_REGULATION_OF_MUSCLE_CELL_DIFFERENTIATION	0.352063	0.265396	0.701709
GO_RNA_POLYMERASE_II_TRANSCRIPTION_FACTOR_COMPLEX	0.361362	0.276878	0.701904
GO_POSITIVE_REGULATION_OF_HEMOPOIESIS	0.302371	0.280108	0.701927
GO_REGULATION_OF_RESPONSE_TO_ENDOPLASMIC_RETICULUM_STRESS	0.372398	0.294964	0.701952
GO_POSITIVE_REGULATION_OF_VASCULATURE_DEVELOPMENT	0.328934	0.287518	0.702204
GO_CYTOKINE_PRODUCTION	0.244278	0.204059	0.702494
GO_ANION_TRANSPORT	0.283349	0.287062	0.702884
GO_REGULATION_OF_GROWTH	0.254394	0.270531	0.703371
GO_SPECIFIC_GRANULE	0.328706	0.297753	0.703694
GO_TRANSITION_METAL_ION_TRANSPORT	0.361371	0.304024	0.703873
GO_RESPONSE_TO_PEPTIDE_HORMONE	0.278372	0.276568	0.70522
GO_POSITIVE_REGULATION_OF_LOCOMOTION	0.254421	0.25731	0.70526
GO_REGULATION_OF_MULTI_ORGANISM_PROCESS	0.241076	0.243764	0.706937
GO_NEURON_APOPTOTIC_PROCESS	0.303136	0.27748	0.707502
GO_REGULATION_OF_MORPHOGENESIS_OF_AN_EPITHELIUM	0.329765	0.317744	0.707966
GO_LATE_ENDOSOME	0.303757	0.290107	0.70875
GO_REGULATION_OF_INTRACELLULAR_SIGNAL_TRANSDUCTION	0.223021	0.225053	0.708995
GO_REGULATION_OF_ANIMAL_ORGAN_MORPHOGENESIS	0.308103	0.297082	0.709358
GO_REGULATION_OF_SYMBIOSIS_ENCOMPASSING_MUTUALISM_THROUGH_PARASITISM	0.295395	0.280272	0.709551
GO_CATION_TRANSMEMBRANE_TRANSPORTER_ACTIVITY	0.293447	0.296149	0.709641
GO_VESICLE_ORGANIZATION	0.287996	0.296689	0.70977
GO_POSITIVE_REGULATION_OF_RNA_METABOLIC_PROCESS	0.232214	0.240267	0.710186
GO_POSITIVE_REGULATION_OF_OSSIFICATION	0.368531	0.318665	0.710413
GO_REGULATION_OF_CELL_MORPHOGENESIS	0.276995	0.280105	0.710493
GO_RESPONSE_TO_ESTRADIOL	0.380968	0.305882	0.711421
GO_CHEMOKINE_PRODUCTION	0.352527	0.313056	0.711496
GO_MICROTUBULE	0.325358	0.316597	0.714235
GO_AMINOGLYCAN_METABOLIC_PROCESS	0.339689	0.304348	0.717663
GO_OUTER_MEMBRANE	0.313787	0.324895	0.720381
GO_SMALL_MOLECULE_METABOLIC_PROCESS	0.226282	0.260679	0.720937
GO_PERINUCLEAR_REGION_OF_CYTOPLASM	0.261554	0.301115	0.721682
GO_IN_UTERO_EMBRYONIC_DEVELOPMENT	0.291495	0.30491	0.721866
GO_REGULATION_OF_MACROAUTOPHAGY	0.323947	0.295875	0.722115
GO_DETOXIFICATION	0.349181	0.332335	0.722473
GO_CELLULAR_AMINO_ACID_METABOLIC_PROCESS	0.344747	0.320359	0.726295
GO_NEGATIVE_REGULATION_OF_NEURON_DEATH	0.310316	0.305398	0.726374
GO_SMALL_GTPASE_BINDING	0.275255	0.294564	0.727619
GO_ADAPTIVE_IMMUNE_RESPONSE	0.279144	0.316206	0.729712
GO_NEGATIVE_REGULATION_OF_CELL_DIFFERENTIATION	0.255658	0.280146	0.731262
GO_POSITIVE_REGULATION_OF_WNT_SIGNALING_PATHWAY	0.319619	0.308677	0.731773
GO_KINASE_BINDING	0.243665	0.294872	0.731996
GO_EXOCYTIC_VESICLE	0.361888	0.314843	0.73226
GO_PROTEIN_LOCALIZATION_TO_CELL_PERIPHERY	0.287204	0.312242	0.733728
GO_POSITIVE_REGULATION_OF_CELLULAR_COMPONENT_ORGANIZATION	0.233147	0.2932	0.737138
GO_REGULATION_OF_PROTEIN_LOCALIZATION_TO_PLASMA_MEMBRANE	0.373124	0.314675	0.740415
GO_REGULATION_OF_CELL_PROJECTION_ORGANIZATION	0.261632	0.316919	0.74233
GO_CELLULAR_RESPONSE_TO_REACTIVE_OXYGEN_SPECIES	0.328659	0.329971	0.74519
GO_MORPHOGENESIS_OF_A_POLARIZED_EPITHELIUM	0.34856	0.320896	0.745877
GO_TUMOR_NECROSIS_FACTOR_SUPERFAMILY_CYTOKINE_PRODUCTION	0.289897	0.340314	0.746284
GO_POSITIVE_REGULATION_OF_INFLAMMATORY_RESPONSE	0.31145	0.340845	0.747023
GO_NEGATIVE_REGULATION_OF_CELL_CYCLE_PROCESS	0.296083	0.326057	0.747446
GO_PHAGOCYTIC_VESICLE_MEMBRANE	0.323843	0.352174	0.747576
GO_EAR_DEVELOPMENT	0.336846	0.333333	0.747618
GO_BIOLOGICAL_ADHESION	0.225856	0.294989	0.747667
GO_COATED_VESICLE	0.296484	0.352113	0.747747
GO_PLATELET_ACTIVATION	0.340239	0.335277	0.748214
GO_RECEPTOR_INTERNALIZATION	0.344045	0.35061	0.748554
GO_POSITIVE_REGULATION_OF_MYELOID_LEUKOCYTE_DIFFERENTIATION	0.361419	0.35479	0.748638
GO_REGULATION_OF_ESTABLISHMENT_OF_PLANAR_POLARITY	0.34856	0.358209	0.74892
GO_REGULATION_OF_PEPTIDYL_TYROSINE_PHOSPHORYLATION	0.292858	0.334688	0.748994
GO_POSITIVE_REGULATION_OF_REACTIVE_OXYGEN_SPECIES_METABOLIC_PROCESS	0.316978	0.330532	0.749777
GO_PLASMA_MEMBRANE_REGION	0.24243	0.330569	0.751928
GO_RNA_POLYMERASE_II_SPECIFIC_DNA_BINDING_TRANSCRIPTION_FACTOR_BINDING	0.295278	0.336552	0.754551
GO_DNA_BINDING_TRANSCRIPTION_FACTOR_BINDING	0.283631	0.354447	0.757055
GO_REGULATION_OF_LEUKOCYTE_DIFFERENTIATION	0.258762	0.368895	0.757262
GO_RESPONSE_TO_TOXIC_SUBSTANCE	0.247824	0.370968	0.75746
GO_CELLULAR_TRANSITION_METAL_ION_HOMEOSTASIS	0.326623	0.367868	0.757629
GO_RUFFLE	0.292299	0.376605	0.75766
GO_REGULATION_OF_MYELOID_LEUKOCYTE_DIFFERENTIATION	0.311378	0.364154	0.75788
GO_NEGATIVE_REGULATION_OF_EXTRINSIC_APOPTOTIC_SIGNALING_PATHWAY	0.361051	0.385714	0.758349
GO_CIRCULATORY_SYSTEM_PROCESS	0.26569	0.352168	0.758386
GO_UBIQUITIN_LIKE_PROTEIN_LIGASE_BINDING	0.272523	0.324183	0.75848
GO_INTRINSIC_COMPONENT_OF_PLASMA_MEMBRANE	0.230065	0.330189	0.758761
GO_CELL_PART_MORPHOGENESIS	0.250383	0.361282	0.758771
GO_NEUROGENESIS	0.224017	0.347778	0.75902
GO_CELLULAR_IRON_ION_HOMEOSTASIS	0.329766	0.362275	0.759043
GO_UBIQUITIN_LIGASE_COMPLEX	0.338587	0.359517	0.759183
GO_EPITHELIAL_TO_MESENCHYMAL_TRANSITION	0.334263	0.35905	0.759309
GO_DRUG_METABOLIC_PROCESS	0.252501	0.366879	0.759386
GO_NEGATIVE_REGULATION_OF_DNA_BINDING_TRANSCRIPTION_FACTOR_ACTIVITY	0.319836	0.360996	0.759493
GO_ANIMAL_ORGAN_MORPHOGENESIS	0.234242	0.342321	0.759775
GO_NEGATIVE_REGULATION_OF_IMMUNE_SYSTEM_PROCESS	0.250637	0.346299	0.75978
GO_IRON_ION_HOMEOSTASIS	0.329766	0.388972	0.760035
GO_REGULATION_OF_WNT_SIGNALING_PATHWAY	0.273618	0.367666	0.760369
GO_SECRETORY_VESICLE	0.220258	0.327851	0.760538
GO_SECRETORY_GRANULE	0.222033	0.319728	0.760646
GO_EARLY_ENDOSOME	0.269328	0.374339	0.760718
GO_RAS_GUANYL_NUCLEOTIDE_EXCHANGE_FACTOR_ACTIVITY	0.319346	0.357349	0.760793
GO_CELLULAR_RESPONSE_TO_EXTERNAL_STIMULUS	0.279622	0.353866	0.761113
GO_ACTIVE_TRANSMEMBRANE_TRANSPORTER_ACTIVITY	0.290479	0.379973	0.761171
GO_PEPTIDYL_THREONINE_MODIFICATION	0.347634	0.353752	0.761238
GO_SENSORY_PERCEPTION	0.308273	0.390805	0.761565
GO_ORGAN_GROWTH	0.310652	0.357345	0.761634
GO_TRANSCRIPTION_FACTOR_COMPLEX	0.28793	0.370817	0.761647
GO_DRUG_BINDING	0.226582	0.351197	0.761908
GO_METAL_ION_HOMEOSTASIS	0.245517	0.336294	0.762074
GO_INTRINSIC_APOPTOTIC_SIGNALING_PATHWAY	0.275343	0.340108	0.76224
GO_TRANSCRIPTION_FACTOR_BINDING	0.24781	0.342072	0.762279
GO_TRANSITION_METAL_ION_BINDING	0.253066	0.331258	0.762315
GO_REGULATION_OF_MEMBRANE_POTENTIAL	0.303387	0.371631	0.762451
GO_NEURON_PROJECTION_EXTENSION	0.358823	0.364568	0.762456
GO_RESPONSE_TO_TEMPERATURE_STIMULUS	0.297279	0.331551	0.762555
GO_POSITIVE_REGULATION_OF_CELLULAR_CATABOLIC_PROCESS	0.274742	0.343164	0.762634
GO_REGULATION_OF_CELL_ADHESION	0.237344	0.331368	0.763191
GO_CELLULAR_ION_HOMEOSTASIS	0.237318	0.331354	0.763493
GO_TRANSITION_METAL_ION_HOMEOSTASIS	0.326623	0.342407	0.76355
GO_CENTRAL_NERVOUS_SYSTEM_DEVELOPMENT	0.234048	0.37381	0.764049
GO_NEGATIVE_REGULATION_OF_PROTEIN_METABOLIC_PROCESS	0.219387	0.356257	0.765125
GO_DIVALENT_INORGANIC_CATION_HOMEOSTASIS	0.260132	0.36911	0.766411
GO_REGULATION_OF_TRANSPORTER_ACTIVITY	0.293768	0.369231	0.766628
GO_REGULATION_OF_BINDING	0.258714	0.379487	0.766767
GO_REGULATION_OF_RESPONSE_TO_CYTOKINE_STIMULUS	0.285458	0.391911	0.767286
GO_REGULATION_OF_RESPONSE_TO_STRESS	0.212517	0.369447	0.767523
GO_CHROMOSOME	0.225492	0.368605	0.767685
GO_ACTIVATION_OF_IMMUNE_RESPONSE	0.229858	0.366467	0.76868
GO_CELLULAR_RESPONSE_TO_HORMONE_STIMULUS	0.237182	0.382629	0.769492
GO_CATALYTIC_ACTIVITY_ACTING_ON_RNA	0.326451	0.385387	0.770513
GO_HOMEOSTATIC_PROCESS	0.208071	0.366883	0.770586
GO_ENDOPLASMIC_RETICULUM	0.215105	0.359341	0.77095
GO_VACUOLAR_LUMEN	0.277234	0.398639	0.771179
GO_APICAL_PLASMA_MEMBRANE	0.302157	0.382857	0.77119
GO_STRIATED_MUSCLE_CELL_DIFFERENTIATION	0.300953	0.384507	0.771203
GO_NEGATIVE_REGULATION_OF_SIGNALING	0.213705	0.369231	0.771831
GO_REGULATION_OF_IMMUNE_RESPONSE	0.215416	0.369469	0.772854
GO_NEGATIVE_REGULATION_OF_CANONICAL_WNT_SIGNALING_PATHWAY	0.311756	0.401449	0.773022
GO_REGULATION_OF_INFLAMMATORY_RESPONSE	0.253961	0.384419	0.773682
GO_NEGATIVE_REGULATION_OF_CYTOKINE_PRODUCTION	0.274647	0.391781	0.775221
GO_NEGATIVE_REGULATION_OF_CELL_DEVELOPMENT	0.286703	0.408022	0.776034
GO_POSITIVE_REGULATION_OF_MOLECULAR_FUNCTION	0.205821	0.401075	0.77795
GO_TRANSPORT_VESICLE	0.288163	0.409091	0.779062
GO_RESPIRATORY_SYSTEM_DEVELOPMENT	0.320327	0.428786	0.779131
GO_POSITIVE_REGULATION_OF_RESPONSE_TO_EXTERNAL_STIMULUS	0.221203	0.403981	0.779775
GO_PATTERN_RECOGNITION_RECEPTOR_SIGNALING_PATHWAY	0.277241	0.41384	0.780001
GO_POSITIVE_REGULATION_OF_CATABOLIC_PROCESS	0.248595	0.405405	0.780265
GO_DNA_REPLICATION	0.355239	0.413846	0.780526
GO_CELL_MORPHOGENESIS_INVOLVED_IN_NEURON_DIFFERENTIATION	0.258365	0.426702	0.780555
GO_REGULATION_OF_DEFENSE_RESPONSE	0.219585	0.386183	0.780918
GO_NEGATIVE_REGULATION_OF_LOCOMOTION	0.267495	0.397117	0.780979
GO_REGULATION_OF_INTRACELLULAR_TRANSPORT	0.258336	0.420708	0.781129
GO_VACUOLE	0.217823	0.401136	0.78194
GO_NEGATIVE_REGULATION_OF_NEURON_PROJECTION_DEVELOPMENT	0.326447	0.428571	0.781991
GO_CELLULAR_MONOVALENT_INORGANIC_CATION_HOMEOSTASIS	0.305619	0.427921	0.78218
GO_REPRODUCTION	0.223042	0.420238	0.782297
GO_POSITIVE_REGULATION_OF_NUCLEOBASE_CONTAINING_COMPOUND_METABOLIC_PROCESS	0.207772	0.41056	0.782503
GO_TRANSPORTER_ACTIVITY	0.232404	0.429433	0.782607
GO_TRANSCRIPTION_COACTIVATOR_ACTIVITY	0.310283	0.403535	0.782673
GO_T_CELL_DIFFERENTIATION	0.277468	0.408528	0.782773
GO_RESPONSE_TO_RADIATION	0.265321	0.406375	0.783205
GO_POSITIVE_REGULATION_OF_LEUKOCYTE_MEDIATED_IMMUNITY	0.326507	0.423477	0.78327
GO_CELL_MATRIX_ADHESION	0.284429	0.405046	0.783606
GO_CELL_LEADING_EDGE	0.239106	0.429119	0.783642
GO_MACROAUTOPHAGY	0.259535	0.41701	0.783765
GO_REGULATION_OF_GENE_EXPRESSION_EPIGENETIC	0.287583	0.396978	0.783892
GO_NEGATIVE_REGULATION_OF_LEUKOCYTE_CELL_CELL_ADHESION	0.308473	0.424376	0.784056
GO_REGULATION_OF_CELL_DEVELOPMENT	0.223767	0.39186	0.784226
GO_CILIUM	0.307447	0.401171	0.784566
GO_ORGANIC_HYDROXY_COMPOUND_TRANSPORT	0.31995	0.450663	0.784756
GO_ORGANIC_ACID_CATABOLIC_PROCESS	0.316773	0.426036	0.78517
GO_RESPONSE_TO_GROWTH_FACTOR	0.227846	0.394012	0.785199
GO_REGULATION_OF_PROTEIN_LOCALIZATION_TO_CELL_PERIPHERY	0.336926	0.451368	0.785486
GO_SENSORY_ORGAN_DEVELOPMENT	0.26224	0.399188	0.785564
GO_GTPASE_BINDING	0.242984	0.451737	0.785646
GO_ANTIGEN_PROCESSING_AND_PRESENTATION_OF_PEPTIDE_ANTIGEN	0.261487	0.430686	0.785672
GO_POSITIVE_REGULATION_OF_SIGNALING	0.202675	0.387885	0.785829
GO_POSITIVE_REGULATION_OF_CELLULAR_COMPONENT_BIOGENESIS	0.251794	0.413524	0.785979
GO_GENE_SILENCING	0.307783	0.439592	0.786081
GO_ANION_TRANSMEMBRANE_TRANSPORT	0.306794	0.435746	0.786266
GO_STEROID_METABOLIC_PROCESS	0.291325	0.423131	0.786663
GO_POSITIVE_REGULATION_OF_PEPTIDYL_TYROSINE_PHOSPHORYLATION	0.287048	0.453537	0.786898
GO_ION_TRANSMEMBRANE_TRANSPORT	0.222842	0.428401	0.787123
GO_REGULATION_OF_MYELOID_CELL_DIFFERENTIATION	0.262052	0.426846	0.787454
GO_PLACENTA_DEVELOPMENT	0.323044	0.447692	0.787561
GO_ORGANIC_ACID_METABOLIC_PROCESS	0.220704	0.442424	0.787568
GO_REGULATION_OF_MUSCLE_CONTRACTION	0.31778	0.436578	0.787646
GO_REGULATION_OF_SMALL_GTPASE_MEDIATED_SIGNAL_TRANSDUCTION	0.258721	0.428195	0.78799
GO_NEGATIVE_REGULATION_OF_BINDING	0.304307	0.432432	0.788117
GO_REGULATION_OF_CELL_KILLING	0.337111	0.433991	0.788414
GO_RESPONSE_TO_LIGHT_STIMULUS	0.28259	0.441541	0.78941
GO_MEMBRANE_FUSION	0.308391	0.434524	0.791012
GO_NUCLEAR_PERIPHERY	0.329639	0.43685	0.791248
GO_VESICLE_MEMBRANE	0.217111	0.440273	0.793272
GO_CELLULAR_RESPONSE_TO_RADIATION	0.314036	0.453237	0.794526
GO_NEGATIVE_REGULATION_OF_CELL_DEATH	0.211712	0.449143	0.79501
GO_CELLULAR_RESPONSE_TO_HEAT	0.316927	0.459581	0.79556
GO_MUSCLE_ADAPTATION	0.313103	0.454135	0.79641
GO_REGULATION_OF_NERVOUS_SYSTEM_DEVELOPMENT	0.223878	0.445626	0.796677
GO_B_CELL_DIFFERENTIATION	0.288314	0.454674	0.796877
GO_REGULATION_OF_MITOTIC_CELL_CYCLE	0.233498	0.4599	0.797683
GO_CATION_TRANSPORT	0.216788	0.450408	0.798363
GO_HEART_MORPHOGENESIS	0.300734	0.471015	0.79938
GO_PATTERN_SPECIFICATION_PROCESS	0.28187	0.47493	0.802318
GO_REGULATION_OF_CELL_DEATH	0.196789	0.465217	0.802496
GO_SYNAPTIC_MEMBRANE	0.295565	0.457431	0.802828
GO_PHOSPHORIC_ESTER_HYDROLASE_ACTIVITY	0.273562	0.4654	0.803054
GO_MOLECULAR_ADAPTOR_ACTIVITY	0.270709	0.463315	0.803118
GO_ANTIGEN_PROCESSING_AND_PRESENTATION	0.248763	0.457541	0.803329
GO_NEGATIVE_REGULATION_OF_NERVOUS_SYSTEM_DEVELOPMENT	0.273698	0.446003	0.803591
GO_IMMUNE_EFFECTOR_PROCESS	0.199807	0.480435	0.803781
GO_ACTIVE_ION_TRANSMEMBRANE_TRANSPORTER_ACTIVITY	0.286759	0.480349	0.803929
GO_POSITIVE_REGULATION_OF_BINDING	0.287659	0.503737	0.8041
GO_RHO_GTPASE_BINDING	0.280905	0.480463	0.804299
GO_CELL_SUBSTRATE_ADHESION	0.250177	0.459279	0.804299
GO_POSITIVE_REGULATION_OF_MYELOID_CELL_DIFFERENTIATION	0.289519	0.480234	0.804727
GO_PHOSPHATASE_BINDING	0.264895	0.464632	0.80519
GO_IDENTICAL_PROTEIN_BINDING	0.198688	0.501082	0.805338
GO_UBIQUITIN_LIKE_PROTEIN_LIGASE_ACTIVITY	0.31093	0.476831	0.805738
GO_REGULATION_OF_HEART_GROWTH	0.332788	0.476043	0.805782
GO_POSITIVE_REGULATION_OF_DEFENSE_RESPONSE	0.21288	0.482227	0.806451
GO_NUCLEAR_CHROMOSOME_SEGREGATION	0.333717	0.477795	0.806631
GO_CARDIOCYTE_DIFFERENTIATION	0.327648	0.476831	0.807466
GO_TOLL_LIKE_RECEPTOR_SIGNALING_PATHWAY	0.267044	0.49932	0.808721
GO_POSITIVE_REGULATION_OF_IMMUNE_RESPONSE	0.209041	0.502825	0.809554
GO_HYDROLASE_ACTIVITY_ACTING_ON_ESTER_BONDS	0.23679	0.47013	0.809736
GO_RESPONSE_TO_INSULIN	0.25955	0.46123	0.810219
GO_REGULATION_OF_CELL_SUBSTRATE_ADHESION	0.289988	0.471182	0.810264
GO_REGULATION_OF_OSSIFICATION	0.267317	0.486188	0.810392
GO_DISTAL_AXON	0.285527	0.455571	0.810783
GO_ION_TRANSMEMBRANE_TRANSPORTER_ACTIVITY	0.246673	0.478203	0.810844
GO_POSITIVE_REGULATION_OF_DEVELOPMENTAL_GROWTH	0.306754	0.48105	0.811177
GO_REGULATION_OF_CELL_DIVISION	0.30708	0.464544	0.811242
GO_MUSCLE_TISSUE_DEVELOPMENT	0.253591	0.466146	0.811335
GO_REGULATION_OF_CELL_CELL_ADHESION	0.229744	0.471166	0.811411
GO_MUSCLE_ORGAN_DEVELOPMENT	0.254066	0.507266	0.811818
GO_NEGATIVE_REGULATION_OF_CELL_MOTILITY	0.254174	0.488095	0.811875
GO_REGULATION_OF_SMALL_MOLECULE_METABOLIC_PROCESS	0.251752	0.484768	0.811877
GO_REGULATION_OF_ORGANELLE_ASSEMBLY	0.295926	0.475483	0.812133
GO_APICAL_PART_OF_CELL	0.267459	0.46568	0.813088
GO_REGULATION_OF_CATION_CHANNEL_ACTIVITY	0.325587	0.476874	0.813926
GO_CARBOHYDRATE_BIOSYNTHETIC_PROCESS	0.32048	0.503782	0.815497
GO_NEGATIVE_REGULATION_OF_WNT_SIGNALING_PATHWAY	0.28941	0.494964	0.815932
GO_NUCLEAR_HORMONE_RECEPTOR_BINDING	0.303569	0.504386	0.815984
GO_PROTEIN_HETERODIMERIZATION_ACTIVITY	0.243808	0.501926	0.817221
GO_POSITIVE_REGULATION_OF_CELLULAR_BIOSYNTHETIC_PROCESS	0.194738	0.513216	0.818381
GO_PEPTIDYL_TYROSINE_MODIFICATION	0.235765	0.512786	0.818608
GO_PROTEIN_POLYUBIQUITINATION	0.268326	0.511142	0.818998
GO_REGULATION_OF_LEUKOCYTE_MEDIATED_IMMUNITY	0.270156	0.486331	0.819168
GO_ADAPTIVE_IMMUNE_RESPONSE_BASED_ON_SOMATIC_RECOMBINATION_OF_IMMUNE_RECEPTORS_BUILT_FROM_IMMUNOGLOBULIN_SUPERFAMILY_DOMAINS	0.278496	0.483425	0.819288
GO_INTRINSIC_APOPTOTIC_SIGNALING_PATHWAY_IN_RESPONSE_TO_DNA_DAMAGE	0.306271	0.5	0.819355
GO_RESPONSE_TO_OXYGEN_LEVELS	0.226427	0.52005	0.819467
GO_POSITIVE_REGULATION_OF_TRANSPORT	0.19779	0.536036	0.819832
GO_MUSCLE_SYSTEM_PROCESS	0.236248	0.5	0.819973
GO_ATPASE_ACTIVITY_COUPLED	0.310704	0.500743	0.81998
GO_REGULATION_OF_ADAPTIVE_IMMUNE_RESPONSE	0.309054	0.501449	0.821098
GO_NERVOUS_SYSTEM_PROCESS	0.22843	0.512354	0.822099
GO_CELL_SUBSTRATE_JUNCTION_ORGANIZATION	0.315659	0.505376	0.822248
GO_NEGATIVE_REGULATION_OF_CELL_ADHESION	0.235987	0.506562	0.82234
GO_ACTIVATION_OF_INNATE_IMMUNE_RESPONSE	0.226916	0.513298	0.822481
GO_OSSIFICATION	0.244319	0.518868	0.822911
GO_MAMMARY_GLAND_DEVELOPMENT	0.309664	0.512085	0.823642
GO_ATPASE_ACTIVITY	0.262153	0.514685	0.823872
GO_POSITIVE_REGULATION_OF_PROTEIN_CONTAINING_COMPLEX_ASSEMBLY	0.262122	0.509615	0.824226
GO_NEGATIVE_REGULATION_OF_RESPONSE_TO_STIMULUS	0.192219	0.532597	0.824714
GO_MITOTIC_CELL_CYCLE	0.209529	0.534665	0.825099
GO_PROTEIN_IMPORT	0.279653	0.514045	0.825433
GO_ORGANELLE_FUSION	0.308111	0.529412	0.826624
GO_REGULATION_OF_PROTEIN_LOCALIZATION_TO_MEMBRANE	0.281782	0.516837	0.828986
GO_NEGATIVE_REGULATION_OF_ORGANELLE_ORGANIZATION	0.248464	0.546667	0.829301
GO_POSITIVE_REGULATION_OF_CELL_PROJECTION_ORGANIZATION	0.238893	0.538147	0.830018
GO_RESPONSE_TO_ALCOHOL	0.249024	0.53012	0.830498
GO_CELL_PROJECTION_MEMBRANE	0.249577	0.526676	0.83059
GO_POSITIVE_REGULATION_OF_TUMOR_NECROSIS_FACTOR_SUPERFAMILY_CYTOKINE_PRODUCTION	0.275404	0.527221	0.83071
GO_CHROMOSOME_CENTROMERIC_REGION	0.296768	0.492331	0.830828
GO_EPHRIN_RECEPTOR_SIGNALING_PATHWAY	0.307148	0.512195	0.830861
GO_REGULATION_OF_CELLULAR_CATABOLIC_PROCESS	0.198739	0.566589	0.83153
GO_GOLGI_MEMBRANE	0.214917	0.55527	0.831698
GO_CALCIUM_ION_TRANSMEMBRANE_TRANSPORT	0.272361	0.517192	0.831943
GO_REGULATION_OF_CELL_CYCLE	0.200564	0.550343	0.832075
GO_POSITIVE_REGULATION_OF_CHEMOKINE_PRODUCTION	0.31042	0.5231	0.83217
GO_NEGATIVE_REGULATION_OF_CELL_CELL_ADHESION	0.260432	0.513103	0.832241
GO_NUCLEAR_SPECK	0.232388	0.532216	0.83341
GO_IMMUNE_RESPONSE_REGULATING_SIGNALING_PATHWAY	0.204178	0.568047	0.833854
GO_PROTEASE_BINDING	0.29062	0.519939	0.833924
GO_NEGATIVE_REGULATION_OF_CELL_PROJECTION_ORGANIZATION	0.283171	0.511628	0.833957
GO_RAS_PROTEIN_SIGNAL_TRANSDUCTION	0.221606	0.558198	0.834653
GO_CELL_CELL_ADHESION_VIA_PLASMA_MEMBRANE_ADHESION_MOLECULES	0.302718	0.532609	0.83565
GO_REGULATION_OF_CELL_CYCLE_PHASE_TRANSITION	0.234977	0.568807	0.836939
GO_REGULATION_OF_MRNA_METABOLIC_PROCESS	0.228796	0.573265	0.8377
GO_MACROPHAGE_ACTIVATION	0.280849	0.532012	0.837856
GO_PROTEIN_DIMERIZATION_ACTIVITY	0.198019	0.583822	0.838012
GO_REGULATION_OF_ORGAN_GROWTH	0.290455	0.545593	0.838103
GO_PRODUCTION_OF_MOLECULAR_MEDIATOR_OF_IMMUNE_RESPONSE	0.265301	0.540346	0.838182
GO_REGULATION_OF_SYNAPSE_STRUCTURE_OR_ACTIVITY	0.280038	0.534407	0.838577
GO_REGULATION_OF_KINASE_ACTIVITY	0.201523	0.581818	0.83873
GO_UBIQUITIN_LIKE_PROTEIN_TRANSFERASE_ACTIVITY	0.248823	0.555858	0.839342
GO_POSITIVE_REGULATION_OF_ENDOCYTOSIS	0.28568	0.523878	0.839724
GO_HISTONE_BINDING	0.299294	0.538931	0.839854
GO_REGULATION_OF_CATABOLIC_PROCESS	0.194513	0.574179	0.839986
GO_RESPONSE_TO_HEAT	0.284164	0.542348	0.840458
GO_MORPHOGENESIS_OF_AN_EPITHELIUM	0.224408	0.557962	0.843323
GO_BONE_DEVELOPMENT	0.264313	0.560976	0.84506
GO_CHROMOSOME_SEGREGATION	0.266051	0.540616	0.845191
GO_GLYCOPROTEIN_BIOSYNTHETIC_PROCESS	0.252973	0.542741	0.845508
GO_CELLULAR_RESPONSE_TO_STEROID_HORMONE_STIMULUS	0.253736	0.567039	0.845807
GO_RESPONSE_TO_XENOBIOTIC_STIMULUS	0.273364	0.561377	0.846315
GO_REGULATION_OF_CELL_CYCLE_PROCESS	0.21065	0.577065	0.846385
GO_PHOSPHATIDYLINOSITOL_PHOSPHATE_BINDING	0.284682	0.549383	0.846887
GO_ISOMERASE_ACTIVITY	0.29868	0.569486	0.84781
GO_INNATE_IMMUNE_RESPONSE_ACTIVATING_CELL_SURFACE_RECEPTOR_SIGNALING_PATHWAY	0.279573	0.560232	0.848189
GO_CYTOSKELETON_DEPENDENT_INTRACELLULAR_TRANSPORT	0.294119	0.553544	0.848239
GO_POSITIVE_REGULATION_OF_PROTEOLYSIS_INVOLVED_IN_CELLULAR_PROTEIN_CATABOLIC_PROCESS	0.290177	0.560676	0.848579
GO_REGULATION_OF_MRNA_CATABOLIC_PROCESS	0.251925	0.567455	0.848618
GO_NEGATIVE_REGULATION_OF_CELL_CYCLE	0.213425	0.572165	0.84934
GO_LIPID_METABOLIC_PROCESS	0.195901	0.599529	0.849401
GO_FOREBRAIN_DEVELOPMENT	0.259231	0.580142	0.849434
GO_NUCLEAR_RECEPTOR_BINDING	0.298073	0.566358	0.849513
GO_LOCOMOTORY_BEHAVIOR	0.284482	0.54908	0.849741
GO_EMBRYO_DEVELOPMENT_ENDING_IN_BIRTH_OR_EGG_HATCHING	0.219195	0.589809	0.849753
GO_RENAL_SYSTEM_DEVELOPMENT	0.272665	0.563953	0.850272
GO_ORGANONITROGEN_COMPOUND_CATABOLIC_PROCESS	0.185448	0.621681	0.850419
GO_PROTEIN_AUTOPHOSPHORYLATION	0.25729	0.595238	0.850553
GO_POSITIVE_REGULATION_OF_CANONICAL_WNT_SIGNALING_PATHWAY	0.275579	0.556701	0.851205
GO_SODIUM_ION_TRANSPORT	0.286312	0.561328	0.851701
GO_POSITIVE_REGULATION_OF_CELL_DEATH	0.197678	0.610785	0.852083
GO_G_PROTEIN_COUPLED_RECEPTOR_SIGNALING_PATHWAY_COUPLED_TO_CYCLIC_NUCLEOTIDE_SECOND_MESSENGER	0.297895	0.577708	0.852772
GO_REPRODUCTIVE_SYSTEM_DEVELOPMENT	0.230849	0.61631	0.852855
GO_GOLGI_STACK	0.292416	0.59675	0.852943
GO_HEART_GROWTH	0.279226	0.580882	0.852953
GO_MIDBODY	0.259845	0.581662	0.853247
GO_ORGANELLE_MEMBRANE_FUSION	0.294796	0.569044	0.853326
GO_REGULATION_OF_RAS_PROTEIN_SIGNAL_TRANSDUCTION	0.253787	0.604255	0.853479
GO_REGULATION_OF_CELL_SIZE	0.271241	0.567365	0.85353
GO_REGULATION_OF_RESPONSE_TO_BIOTIC_STIMULUS	0.199666	0.610909	0.853892
GO_DNA_REPAIR	0.245322	0.571625	0.853932
GO_REGULATION_OF_PROTEOLYSIS	0.191845	0.628742	0.853944
GO_REGULATION_OF_NUCLEOCYTOPLASMIC_TRANSPORT	0.280377	0.557018	0.854051
GO_POSITIVE_REGULATION_OF_PEPTIDE_HORMONE_SECRETION	0.29726	0.567652	0.854097
GO_GUANYL_NUCLEOTIDE_EXCHANGE_FACTOR_ACTIVITY	0.248018	0.588489	0.854097
GO_DEVELOPMENT_OF_PRIMARY_SEXUAL_CHARACTERISTICS	0.272373	0.557863	0.854415
GO_LYMPHOCYTE_ACTIVATION_INVOLVED_IN_IMMUNE_RESPONSE	0.266442	0.586207	0.854488
GO_REGULATION_OF_OSTEOBLAST_DIFFERENTIATION	0.290195	0.575301	0.854494
GO_CELL_CYCLE_PHASE_TRANSITION	0.210392	0.594663	0.854602
GO_POSITIVE_REGULATION_OF_LIPID_LOCALIZATION	0.298337	0.581184	0.854713
GO_TERTIARY_GRANULE	0.242273	0.575035	0.855282
GO_ACTIN_CYTOSKELETON_REORGANIZATION	0.289457	0.602659	0.855312
GO_REGULATION_OF_TRANSPORT	0.178777	0.636364	0.855638
GO_REGULATION_OF_WOUND_HEALING	0.285042	0.570163	0.855899
GO_MUSCLE_CONTRACTION	0.239342	0.584254	0.856305
GO_POSITIVE_REGULATION_OF_NEURON_PROJECTION_DEVELOPMENT	0.251853	0.622721	0.856698
GO_STRESS_ACTIVATED_PROTEIN_KINASE_SIGNALING_CASCADE	0.225511	0.605195	0.860239
GO_REGULATION_OF_CELLULAR_COMPONENT_SIZE	0.211732	0.614194	0.861332
GO_SUPRAMOLECULAR_POLYMER	0.207727	0.6171	0.861697
GO_OSTEOBLAST_DIFFERENTIATION	0.257349	0.610098	0.863073
GO_REGULATION_OF_BLOOD_CIRCULATION	0.272761	0.61194	0.863229
GO_CELL_CYCLE	0.17921	0.685164	0.865664
GO_NUCLEAR_MEMBRANE	0.238454	0.602476	0.865859
GO_CELL_DIVISION	0.21214	0.642586	0.867214
GO_MONOCARBOXYLIC_ACID_METABOLIC_PROCESS	0.208931	0.634881	0.867444
GO_GOLGI_APPARATUS	0.180587	0.687151	0.86754
GO_VESICLE_LOCALIZATION	0.283486	0.611694	0.868041
GO_ORGANIC_ACID_BIOSYNTHETIC_PROCESS	0.23709	0.642955	0.868197
GO_MEMBRANE_INVAGINATION	0.26688	0.599711	0.868475
GO_CATION_TRANSMEMBRANE_TRANSPORT	0.196517	0.667479	0.868524
GO_POSITIVE_REGULATION_OF_ION_TRANSMEMBRANE_TRANSPORT	0.277351	0.613933	0.868699
GO_COLLAGEN_METABOLIC_PROCESS	0.287088	0.635802	0.869218
GO_CELL_CYCLE_PROCESS	0.185135	0.680672	0.86923
GO_IMPORT_INTO_NUCLEUS	0.27374	0.616192	0.869442
GO_CYTOSKELETON_ORGANIZATION	0.181563	0.687919	0.869565
GO_ENDOPLASMIC_RETICULUM_TO_GOLGI_VESICLE_MEDIATED_TRANSPORT	0.265026	0.638571	0.869634
GO_NEURON_PROJECTION	0.18669	0.678106	0.869668
GO_ERYTHROCYTE_HOMEOSTASIS	0.246491	0.623611	0.870052
GO_PHOSPHATASE_ACTIVITY	0.248755	0.623431	0.870186
GO_ORGANIC_HYDROXY_COMPOUND_BIOSYNTHETIC_PROCESS	0.28353	0.637636	0.870253
GO_POSITIVE_REGULATION_OF_NEURON_APOPTOTIC_PROCESS	0.297044	0.623457	0.870384
GO_T_CELL_ACTIVATION	0.197956	0.64557	0.87098
GO_INTERFERON_GAMMA_MEDIATED_SIGNALING_PATHWAY	0.270603	0.636364	0.874043
GO_REGULATION_OF_MICROTUBULE_BASED_PROCESS	0.254007	0.629898	0.87463
GO_CELL_MORPHOGENESIS_INVOLVED_IN_DIFFERENTIATION	0.201276	0.682657	0.874891
GO_HORMONE_RECEPTOR_BINDING	0.261434	0.611354	0.875037
GO_CADHERIN_BINDING	0.194248	0.673671	0.877301
GO_NEGATIVE_REGULATION_OF_INFLAMMATORY_RESPONSE	0.275952	0.63097	0.8775
GO_TISSUE_MORPHOGENESIS	0.198632	0.683168	0.879116
GO_ORGANIC_ANION_TRANSPORT	0.223006	0.66985	0.881918
GO_SENSORY_ORGAN_MORPHOGENESIS	0.258455	0.631579	0.882176
GO_SULFUR_COMPOUND_BIOSYNTHETIC_PROCESS	0.279099	0.620536	0.882969
GO_NEURON_SPINE	0.266574	0.643594	0.883569
GO_POSITIVE_REGULATION_OF_TRANSMEMBRANE_TRANSPORT	0.250505	0.629842	0.884152
GO_MONOVALENT_INORGANIC_CATION_TRANSMEMBRANE_TRANSPORTER_ACTIVITY	0.240815	0.636888	0.884271
GO_PROTEIN_DOMAIN_SPECIFIC_BINDING	0.186905	0.691748	0.885306
GO_CARBOHYDRATE_HOMEOSTASIS	0.243287	0.65483	0.887338
GO_REGULATION_OF_RNA_SPLICING	0.246721	0.65562	0.88905
GO_PROTEIN_KINASE_ACTIVITY	0.195625	0.690415	0.889543
GO_CELLULAR_RESPONSE_TO_PEPTIDE_HORMONE_STIMULUS	0.209503	0.672	0.89115
GO_HEAD_DEVELOPMENT	0.194655	0.697816	0.892007
GO_KINASE_ACTIVITY	0.192481	0.70267	0.892907
GO_NEGATIVE_REGULATION_OF_CELLULAR_CATABOLIC_PROCESS	0.212201	0.691156	0.893057
GO_ORGANELLE_LOCALIZATION	0.203637	0.703608	0.893598
GO_CONTRACTILE_FIBER	0.245325	0.667622	0.898322
GO_CELL_GROWTH	0.198	0.69359	0.898867
GO_SPINDLE	0.235705	0.660793	0.899131
GO_ADENYL_NUCLEOTIDE_BINDING	0.174201	0.73526	0.901729
GO_CELL_PROJECTION_ASSEMBLY	0.204579	0.705959	0.902715
GO_INTRINSIC_COMPONENT_OF_ENDOPLASMIC_RETICULUM_MEMBRANE	0.25824	0.683658	0.902843
GO_POSITIVE_REGULATION_OF_MULTI_ORGANISM_PROCESS	0.182799	0.729634	0.903214
GO_NUCLEAR_OUTER_MEMBRANE_ENDOPLASMIC_RETICULUM_MEMBRANE_NETWORK	0.172562	0.764228	0.903833
GO_REGULATION_OF_CELLULAR_RESPONSE_TO_STRESS	0.180329	0.715294	0.904084
GO_PROTEIN_DEPHOSPHORYLATION	0.211252	0.698287	0.904451
GO_TRANSPORT_VESICLE_MEMBRANE	0.260374	0.665185	0.904628
GO_TRANSFERASE_ACTIVITY_TRANSFERRING_ACYL_GROUPS	0.277715	0.643939	0.904868
GO_RESPONSE_TO_AMMONIUM_ION	0.252452	0.671491	0.905039
GO_NEGATIVE_REGULATION_OF_DEFENSE_RESPONSE	0.238472	0.647966	0.905345
GO_REGULATION_OF_ENDOCYTOSIS	0.226746	0.707941	0.905485
GO_REGULATION_OF_HEMOPOIESIS	0.185357	0.714982	0.905695
GO_NUCLEAR_ENVELOPE	0.197032	0.722955	0.90572
GO_MRNA_TRANSPORT	0.253295	0.699396	0.90606
GO_ESTABLISHMENT_OF_ORGANELLE_LOCALIZATION	0.209127	0.715481	0.906214
GO_REGIONALIZATION	0.235748	0.69242	0.906565
GO_REGULATION_OF_CELLULAR_LOCALIZATION	0.178544	0.740396	0.90667
GO_POLYMERIC_CYTOSKELETAL_FIBER	0.206644	0.714854	0.906752
GO_RECEPTOR_SIGNALING_PATHWAY_VIA_STAT	0.248259	0.669972	0.906792
GO_SKELETAL_MUSCLE_ORGAN_DEVELOPMENT	0.250161	0.696662	0.906874
GO_NEGATIVE_REGULATION_OF_PHOSPHORYLATION	0.201195	0.702155	0.906903
GO_TRANSMEMBRANE_TRANSPORT	0.1748	0.749129	0.907146
GO_POSITIVE_REGULATION_OF_RESPONSE_TO_BIOTIC_STIMULUS	0.188863	0.733251	0.9073
GO_CELLULAR_PROTEIN_CATABOLIC_PROCESS	0.178713	0.731083	0.9074
GO_CELLULAR_RESPONSE_TO_DNA_DAMAGE_STIMULUS	0.187229	0.756098	0.907484
GO_REGULATION_OF_CELL_MORPHOGENESIS_INVOLVED_IN_DIFFERENTIATION	0.225954	0.692525	0.907527
GO_PRESYNAPSE	0.212345	0.72252	0.907701
GO_DNA_BIOSYNTHETIC_PROCESS	0.238737	0.695775	0.907774
GO_NEGATIVE_REGULATION_OF_IMMUNE_RESPONSE	0.239144	0.696839	0.908522
GO_SITE_OF_POLARIZED_GROWTH	0.248823	0.694645	0.908987
GO_CELLULAR_RESPONSE_TO_INSULIN_STIMULUS	0.218219	0.709677	0.909026
GO_COENZYME_BINDING	0.250896	0.691265	0.909189
GO_PEPTIDYL_SERINE_MODIFICATION	0.209061	0.723036	0.909757
GO_EMBRYONIC_ORGAN_DEVELOPMENT	0.220557	0.728997	0.909875
GO_PHAGOCYTIC_VESICLE	0.207244	0.711749	0.910137
GO_MICROTUBULE_CYTOSKELETON	0.176213	0.76533	0.910462
GO_INTRACELLULAR_RECEPTOR_SIGNALING_PATHWAY	0.213382	0.703146	0.910913
GO_REGULATION_OF_CELL_CYCLE_G1_S_PHASE_TRANSITION	0.236284	0.663448	0.911022
GO_TRANSFERASE_ACTIVITY_TRANSFERRING_PHOSPHORUS_CONTAINING_GROUPS	0.174703	0.760291	0.911255
GO_REGULATION_OF_COAGULATION	0.266152	0.711569	0.912152
GO_INORGANIC_ION_TRANSMEMBRANE_TRANSPORT	0.183672	0.752158	0.913039
GO_CARDIAC_MUSCLE_TISSUE_DEVELOPMENT	0.229625	0.701578	0.913102
GO_RIBONUCLEOTIDE_BINDING	0.162534	0.806054	0.914465
GO_CELL_CYCLE_ARREST	0.220809	0.722146	0.915888
GO_REGULATION_OF_CYTOSKELETON_ORGANIZATION	0.182963	0.778895	0.918493
GO_MICROTUBULE_BASED_PROCESS	0.195568	0.752881	0.918637
GO_PHOSPHOLIPID_METABOLIC_PROCESS	0.215991	0.735372	0.918649
GO_REGULATION_OF_CELLULAR_PROTEIN_LOCALIZATION	0.184319	0.770781	0.919479
GO_ORGANELLE_ENVELOPE_LUMEN	0.245495	0.717523	0.921613
GO_POSITIVE_REGULATION_OF_KINASE_ACTIVITY	0.183119	0.785627	0.921683
GO_VACUOLE_ORGANIZATION	0.230581	0.730607	0.921817
GO_UNFOLDED_PROTEIN_BINDING	0.265388	0.705615	0.92219
GO_ERAD_PATHWAY	0.259957	0.732416	0.922636
GO_CHROMOSOMAL_REGION	0.219818	0.731944	0.92266
GO_REGULATION_OF_TRANSFERASE_ACTIVITY	0.165327	0.785057	0.922913
GO_REGULATION_OF_PROTEASOMAL_UBIQUITIN_DEPENDENT_PROTEIN_CATABOLIC_PROCESS	0.250921	0.725111	0.923335
GO_NEGATIVE_REGULATION_OF_MAPK_CASCADE	0.235186	0.710448	0.923391
GO_SUPRAMOLECULAR_COMPLEX	0.171632	0.787105	0.923408
GO_REGULATION_OF_MRNA_PROCESSING	0.243263	0.727405	0.923735
GO_CIRCADIAN_RHYTHM	0.234186	0.75762	0.924382
GO_GLUTAMATERGIC_SYNAPSE	0.201728	0.757322	0.924489
GO_INTRACELLULAR_STEROID_HORMONE_RECEPTOR_SIGNALING_PATHWAY	0.240874	0.718797	0.924647
GO_POSITIVE_REGULATION_OF_PROTEIN_POLYMERIZATION	0.227668	0.74569	0.925953
GO_MICROTUBULE_CYTOSKELETON_ORGANIZATION	0.202363	0.752044	0.929504
GO_VESICLE_BUDDING_FROM_MEMBRANE	0.253041	0.725191	0.92964
GO_MITOTIC_NUCLEAR_DIVISION	0.238158	0.749632	0.930168
GO_COFACTOR_METABOLIC_PROCESS	0.193979	0.794466	0.930349
GO_CORTICAL_CYTOSKELETON	0.238181	0.765244	0.933508
GO_PALLIUM_DEVELOPMENT	0.253029	0.745185	0.936045
GO_POSITIVE_REGULATION_OF_HORMONE_SECRETION	0.235629	0.750725	0.937199
GO_POSITIVE_REGULATION_OF_CELL_MORPHOGENESIS_INVOLVED_IN_DIFFERENTIATION	0.246662	0.759203	0.937822
GO_MAINTENANCE_OF_PROTEIN_LOCATION	0.246996	0.749614	0.938124
GO_REGULATION_OF_CYSTEINE_TYPE_ENDOPEPTIDASE_ACTIVITY	0.208738	0.769018	0.940756
GO_PML_BODY	0.249041	0.773006	0.943964
GO_PH_REDUCTION	0.242908	0.741486	0.944188
GO_LIPID_BIOSYNTHETIC_PROCESS	0.178751	0.808917	0.94628
GO_ORGANOPHOSPHATE_METABOLIC_PROCESS	0.163297	0.83671	0.946373
GO_REGULATION_OF_GENERATION_OF_PRECURSOR_METABOLITES_AND_ENERGY	0.247845	0.759712	0.946442
GO_NOTCH_SIGNALING_PATHWAY	0.220562	0.758571	0.947418
GO_HEART_PROCESS	0.2335	0.764618	0.948986
GO_REGULATION_OF_INTRACELLULAR_PROTEIN_TRANSPORT	0.205648	0.779856	0.94921
GO_ACTIN_BINDING	0.177738	0.794271	0.94925
GO_CYTOSKELETAL_PROTEIN_BINDING	0.163583	0.842417	0.949468
GO_REGULATION_OF_RHO_PROTEIN_SIGNAL_TRANSDUCTION	0.226625	0.789394	0.954772
GO_REGULATION_OF_ORGANELLE_ORGANIZATION	0.152955	0.882016	0.961686
GO_MUSCLE_HYPERTROPHY	0.242371	0.786624	0.961709
GO_EMBRYO_DEVELOPMENT	0.161673	0.866989	0.962992
GO_REGULATION_OF_AXONOGENESIS	0.225921	0.772595	0.963236
GO_SPECIFIC_GRANULE_MEMBRANE	0.22651	0.802083	0.964415
GO_CELLULAR_RESPONSE_TO_AMMONIUM_ION	0.2316	0.779911	0.96474
GO_CELLULAR_LIPID_METABOLIC_PROCESS	0.162104	0.884379	0.965289
GO_POSITIVE_REGULATION_OF_ACTIN_FILAMENT_POLYMERIZATION	0.225948	0.786046	0.965395
GO_RNA_SPLICING_VIA_TRANSESTERIFICATION_REACTIONS	0.18644	0.816845	0.96542
GO_NEGATIVE_REGULATION_OF_CELL_GROWTH	0.221642	0.779586	0.965612
GO_MICROTUBULE_ORGANIZING_CENTER	0.173632	0.838668	0.965643
GO_TUMOR_NECROSIS_FACTOR_MEDIATED_SIGNALING_PATHWAY	0.214797	0.817518	0.965788
GO_ESTABLISHMENT_OR_MAINTENANCE_OF_CELL_POLARITY	0.216727	0.81402	0.96643
GO_REGULATION_OF_TRANSCRIPTION_FROM_RNA_POLYMERASE_II_PROMOTER_IN_RESPONSE_TO_HYPOXIA	0.220355	0.801205	0.966501
GO_SMALL_MOLECULE_CATABOLIC_PROCESS	0.187413	0.826203	0.967433
GO_CELL_JUNCTION_ASSEMBLY	0.202219	0.834254	0.967578
GO_NEGATIVE_REGULATION_OF_CELLULAR_AMIDE_METABOLIC_PROCESS	0.211119	0.824225	0.967898
GO_REGULATION_OF_ATP_METABOLIC_PROCESS	0.24276	0.826484	0.969485
GO_ESTABLISHMENT_OF_RNA_LOCALIZATION	0.199935	0.823362	0.970228
GO_POSITIVE_REGULATION_OF_TRANSFERASE_ACTIVITY	0.158421	0.874548	0.971337
GO_CELLULAR_PROTEIN_COMPLEX_DISASSEMBLY	0.202786	0.806916	0.973354
GO_NEGATIVE_REGULATION_OF_IMMUNE_EFFECTOR_PROCESS	0.216013	0.826021	0.974949
GO_NUCLEIC_ACID_PHOSPHODIESTER_BOND_HYDROLYSIS	0.217414	0.837278	0.975596
GO_STEROID_HORMONE_MEDIATED_SIGNALING_PATHWAY	0.204457	0.847181	0.975637
GO_REGULATION_OF_ACTIN_FILAMENT_BASED_PROCESS	0.16516	0.861893	0.976099
GO_REGULATION_OF_HEMATOPOIETIC_PROGENITOR_CELL_DIFFERENTIATION	0.219987	0.831111	0.97619
GO_MICROTUBULE_BASED_MOVEMENT	0.231956	0.832599	0.976399
GO_AZUROPHIL_GRANULE_MEMBRANE	0.211336	0.821374	0.976555
GO_PROTEIN_CATABOLIC_PROCESS	0.146391	0.919954	0.97659
GO_ORGANIC_ACID_TRANSPORT	0.204272	0.819945	0.976721
GO_DNA_TEMPLATED_TRANSCRIPTION_INITIATION	0.223765	0.812052	0.977054
GO_REGULATION_OF_PHOSPHATASE_ACTIVITY	0.202617	0.844444	0.97709
GO_CARBOHYDRATE_METABOLIC_PROCESS	0.164861	0.855867	0.977179
GO_REGULATION_OF_HORMONE_LEVELS	0.171729	0.871429	0.977405
GO_RIBONUCLEOPROTEIN_GRANULE	0.193638	0.850299	0.977493
GO_COENZYME_METABOLIC_PROCESS	0.198975	0.822443	0.977495
GO_REGULATION_OF_STEM_CELL_DIFFERENTIATION	0.220282	0.857778	0.977707
GO_ACTIN_BASED_CELL_PROJECTION	0.199393	0.825069	0.977723
GO_GTPASE_REGULATOR_ACTIVITY	0.188236	0.844828	0.977748
GO_SINGLE_STRANDED_DNA_BINDING	0.231701	0.834543	0.978061
GO_DEPHOSPHORYLATION	0.16526	0.888466	0.978204
GO_PROTEIN_PHOSPHATASE_BINDING	0.20085	0.844286	0.97844
GO_AMMONIUM_ION_METABOLIC_PROCESS	0.221612	0.828148	0.978451
GO_POSITIVE_REGULATION_OF_INTRACELLULAR_TRANSPORT	0.188864	0.84322	0.978614
GO_IMMUNE_RESPONSE_REGULATING_CELL_SURFACE_RECEPTOR_SIGNALING_PATHWAY	0.156003	0.914839	0.978632
GO_ENDOPLASMIC_RETICULUM_GOLGI_INTERMEDIATE_COMPARTMENT	0.208018	0.849112	0.978727
GO_PROTEIN_CONTAINING_COMPLEX_ASSEMBLY	0.135947	0.947426	0.978733
GO_GLUCOSE_METABOLIC_PROCESS	0.20229	0.850941	0.979754
GO_SPHINGOLIPID_METABOLIC_PROCESS	0.212646	0.839827	0.980616
GO_HEMATOPOIETIC_STEM_CELL_DIFFERENTIATION	0.219839	0.846505	0.983051
GO_HORMONE_MEDIATED_SIGNALING_PATHWAY	0.194943	0.866097	0.984273
GO_BASOLATERAL_PLASMA_MEMBRANE	0.201228	0.862891	0.985254
GO_PROTEIN_N_TERMINUS_BINDING	0.219123	0.846626	0.98727
GO_OXIDOREDUCTASE_ACTIVITY	0.145194	0.92707	0.987515
GO_CELL_CORTEX	0.161097	0.919786	0.987731
GO_REGULATION_OF_DNA_METABOLIC_PROCESS	0.17807	0.878322	0.988092
GO_GLYCOPROTEIN_METABOLIC_PROCESS	0.164735	0.890323	0.988103
GO_NEGATIVE_REGULATION_OF_PROTEIN_MODIFICATION_PROCESS	0.14176	0.924939	0.988306
GO_ION_CHANNEL_BINDING	0.211238	0.874251	0.988524
GO_SOMATODENDRITIC_COMPARTMENT	0.146808	0.927361	0.98871
GO_REGULATION_OF_STRESS_ACTIVATED_PROTEIN_KINASE_SIGNALING_CASCADE	0.172135	0.90137	0.988731
GO_CORTICAL_ACTIN_CYTOSKELETON	0.203059	0.856925	0.989048
GO_LEADING_EDGE_MEMBRANE	0.180702	0.877667	0.989169
GO_CELL_CYCLE_CHECKPOINT	0.2152	0.861371	0.989183
GO_MALE_SEX_DIFFERENTIATION	0.207752	0.870091	0.989363
GO_PURINE_CONTAINING_COMPOUND_METABOLIC_PROCESS	0.158207	0.916777	0.989408
GO_CARBOHYDRATE_DERIVATIVE_BIOSYNTHETIC_PROCESS	0.150513	0.920354	0.989443
GO_CELL_CYCLE_G1_S_PHASE_TRANSITION	0.182455	0.870185	0.9897
GO_MRNA_PROCESSING	0.154978	0.911343	0.989743
GO_GLYCEROPHOSPHOLIPID_METABOLIC_PROCESS	0.190602	0.87011	0.989879
GO_STEROID_HORMONE_RECEPTOR_BINDING	0.206205	0.891135	0.990155
GO_GUANYL_NUCLEOTIDE_BINDING	0.152498	0.907609	0.990265
GO_NEGATIVE_REGULATION_OF_PHOSPHORUS_METABOLIC_PROCESS	0.148461	0.933086	0.990357
GO_CENTROSOME	0.152317	0.930323	0.990428
GO_NEGATIVE_REGULATION_OF_CYTOSKELETON_ORGANIZATION	0.208637	0.864947	0.990586
GO_RHYTHMIC_PROCESS	0.174176	0.89726	0.990793
GO_ORGANELLE_FISSION	0.179039	0.903226	0.991077
GO_MEMBRANE_LIPID_METABOLIC_PROCESS	0.188918	0.895742	0.991152
GO_SH3_DOMAIN_BINDING	0.206893	0.867807	0.991192
GO_ANTIGEN_PROCESSING_AND_PRESENTATION_OF_PEPTIDE_ANTIGEN_VIA_MHC_CLASS_I	0.176816	0.887784	0.991193
GO_RNA_LOCALIZATION	0.167803	0.914865	0.99187
GO_PROTEOLYSIS	0.123788	0.985699	0.992127
GO_COFACTOR_BINDING	0.159541	0.919138	0.992131
GO_PROTEIN_FOLDING	0.168513	0.915978	0.992352
GO_PROTEIN_C_TERMINUS_BINDING	0.17951	0.907834	0.992421
GO_MODIFICATION_DEPENDENT_MACROMOLECULE_CATABOLIC_PROCESS	0.139309	0.946848	0.993309
GO_NEGATIVE_REGULATION_OF_CATABOLIC_PROCESS	0.150155	0.94902	0.993667
GO_LAMELLIPODIUM_ORGANIZATION	0.197386	0.886765	0.993978
GO_REGULATION_OF_CELL_CYCLE_G2_M_PHASE_TRANSITION	0.184288	0.910128	0.994651
GO_NUCLEAR_TRANSPORT	0.148612	0.947861	0.995092
GO_NUCLEAR_BODY	0.134648	0.950543	0.995424
GO_PEPTIDE_HORMONE_SECRETION	0.162204	0.935989	0.995684
GO_POSITIVE_REGULATION_OF_RECEPTOR_SIGNALING_PATHWAY_VIA_STAT	0.193982	0.930876	0.996196
GO_MEMBRANE_PROTEIN_COMPLEX	0.121533	0.982896	0.996546
GO_POSITIVE_REGULATION_OF_INTRACELLULAR_PROTEIN_TRANSPORT	0.177877	0.92645	0.996588
GO_CYTOPLASMIC_REGION	0.181773	0.914764	0.996643
GO_REGULATION_OF_RECEPTOR_SIGNALING_PATHWAY_VIA_STAT	0.193982	0.932722	0.99666
GO_METHYLATION	0.180019	0.919355	0.996709
GO_PROTEIN_CONTAINING_COMPLEX_DISASSEMBLY	0.153148	0.934579	0.99705
GO_INTRINSIC_COMPONENT_OF_ORGANELLE_MEMBRANE	0.14594	0.951444	0.998331
GO_CELL_CYCLE_G2_M_PHASE_TRANSITION	0.167523	0.944523	0.998354
GO_PROTEIN_LOCALIZATION_TO_NUCLEUS	0.150162	0.944369	0.998464
GO_REGULATION_OF_PROTEIN_DEPHOSPHORYLATION	0.106156	0.997122	0.998798
GO_PROTEIN_DNA_COMPLEX_SUBUNIT_ORGANIZATION	0.112827	1	0.999239
GO_PROTEIN_MODIFICATION_BY_SMALL_PROTEIN_CONJUGATION_OR_REMOVAL	0.0805391	1	0.999598
GO UP in C3	ES	NOM p-val	FDR q-val
GO_CYTOSOLIC_RIBOSOME	-0.652387	0	0
GO_NUCLEAR_TRANSCRIBED_MRNA_CATABOLIC_PROCESS_NONSENSE_MEDIATED_DECAY	-0.659029	0	0
GO_PROTEIN_LOCALIZATION_TO_ENDOPLASMIC_RETICULUM	-0.600283	0	0
GO_COTRANSLATIONAL_PROTEIN_TARGETING_TO_MEMBRANE	-0.628175	0	0
GO_RIBOSOMAL_SUBUNIT	-0.599051	0	0
GO_ESTABLISHMENT_OF_PROTEIN_LOCALIZATION_TO_ENDOPLASMIC_RETICULUM	-0.623403	0	0
GO_TRANSLATIONAL_INITIATION	-0.58991	0	0
GO_STRUCTURAL_CONSTITUENT_OF_RIBOSOME	-0.600393	0	0
GO_RIBOSOME	-0.56931	0	0
GO_VIRAL_GENE_EXPRESSION	-0.56314	0	0
GO_NUCLEAR_TRANSCRIBED_MRNA_CATABOLIC_PROCESS	-0.58109	0	0
GO_PROTEIN_TARGETING_TO_MEMBRANE	-0.564747	0	0
GO_CYTOSOLIC_LARGE_RIBOSOMAL_SUBUNIT	-0.668981	0	0
GO_LARGE_RIBOSOMAL_SUBUNIT	-0.605143	0	0
GO_CYTOPLASMIC_TRANSLATION	-0.627161	0	0
GO_PROTEIN_TARGETING	-0.475621	0	0
GO_ESTABLISHMENT_OF_PROTEIN_LOCALIZATION_TO_MEMBRANE	-0.481561	0	0
GO_STRUCTURAL_MOLECULE_ACTIVITY	-0.441395	0	0
GO_RRNA_BINDING	-0.661529	0	0
GO_PEPTIDE_BIOSYNTHETIC_PROCESS	-0.421768	0	0
GO_RNA_CATABOLIC_PROCESS	-0.448336	0	0
GO_PEPTIDE_METABOLIC_PROCESS	-0.391407	0	0
GO_RIBONUCLEOPROTEIN_COMPLEX	-0.424302	0	0
GO_POLYSOME	-0.588391	0	0
GO_RIBOSOME_BIOGENESIS	-0.516703	0	4.6092e-05
GO_CYTOSOLIC_SMALL_RIBOSOMAL_SUBUNIT	-0.604243	0	4.79357e-05
GO_RIBOSOMAL_LARGE_SUBUNIT_BIOGENESIS	-0.672686	0	0.000140068
GO_LEUKOCYTE_HOMEOSTASIS	-0.697397	0	0.000163126
GO_SMALL_RIBOSOMAL_SUBUNIT	-0.565598	0	0.000168751
GO_POLYSOMAL_RIBOSOME	-0.613133	0	0.000174778
GO_ESTABLISHMENT_OF_PROTEIN_LOCALIZATION_TO_ORGANELLE	-0.400141	0	0.000217497
GO_RIBONUCLEOPROTEIN_COMPLEX_BIOGENESIS	-0.457519	0	0.000224294
GO_AMIDE_BIOSYNTHETIC_PROCESS	-0.399882	0	0.000231529
GO_RIBOSOME_ASSEMBLY	-0.652898	0	0.000483816
GO_PROTEIN_LOCALIZATION_TO_MEMBRANE	-0.369363	0	0.000507011
GO_ORGANIC_CYCLIC_COMPOUND_CATABOLIC_PROCESS	-0.366645	0	0.00173395
GO_CELLULAR_NITROGEN_COMPOUND_CATABOLIC_PROCESS	-0.358915	0	0.00219848
GO_CELLULAR_AMIDE_METABOLIC_PROCESS	-0.343185	0	0.00280152
GO_NCRNA_METABOLIC_PROCESS	-0.475615	0	0.00334676
GO_RRNA_METABOLIC_PROCESS	-0.49618	0	0.00466104
GO_PROTEIN_LOCALIZATION_TO_ORGANELLE	-0.32658	0	0.00534165
GO_NCRNA_PROCESSING	-0.469021	0	0.00547193
GO_RIBONUCLEOPROTEIN_COMPLEX_SUBUNIT_ORGANIZATION	-0.477246	0	0.00552477
GO_POSITIVE_REGULATION_OF_LEUKOCYTE_PROLIFERATION	-0.517489	0	0.00556426
GO_POSITIVE_REGULATION_OF_GLIOGENESIS	-0.596959	0	0.00811167
GO_POSITIVE_REGULATION_OF_CYTOKINE_SECRETION	-0.498416	0.00643087	0.0106873
GO_REGULATION_OF_GLIOGENESIS	-0.549301	0.00301205	0.0110404
GO_POSITIVE_REGULATION_OF_T_CELL_PROLIFERATION	-0.513048	0	0.0221518
GO_NEGATIVE_REGULATION_OF_LYMPHOCYTE_ACTIVATION	-0.472235	0.00647249	0.0225155
GO_REGULATION_OF_MACROPHAGE_MIGRATION	-0.547154	0.00826446	0.0258674
GO_ORGANONITROGEN_COMPOUND_BIOSYNTHETIC_PROCESS	-0.278225	0	0.0313058
GO_TRANSLATION_FACTOR_ACTIVITY_RNA_BINDING	-0.517678	0	0.0314736
GO_MRNA_METABOLIC_PROCESS	-0.303393	0	0.0357573
GO_CELL_SUBSTRATE_JUNCTION	-0.294899	0	0.0683095
GO_RESPONSE_TO_ETHANOL	-0.444753	0.00974026	0.0686953
GO_ORGANELLE_INNER_MEMBRANE	-0.334048	0.00425532	0.0695307
GO_GAMETE_GENERATION	-0.370639	0.00411523	0.0709994
GO_TRANSLATION_REGULATOR_ACTIVITY	-0.416087	0.0143369	0.0748318
GO_INTERSPECIES_INTERACTION_BETWEEN_ORGANISMS	-0.259763	0	0.074905
GO_NEGATIVE_REGULATION_OF_CELL_ACTIVATION	-0.390291	0.0173611	0.075057
GO_CELLULAR_PROCESS_INVOLVED_IN_REPRODUCTION_IN_MULTICELLULAR_ORGANISM	-0.45305	0.0117302	0.0758958
GO_LEUKOCYTE_PROLIFERATION	-0.342142	0.00390625	0.0871825
GO_REGULATION_OF_CYTOKINE_PRODUCTION_INVOLVED_IN_IMMUNE_RESPONSE	-0.461224	0.0196078	0.0911697
GO_LIPID_CATABOLIC_PROCESS	-0.377199	0.0111524	0.0923182
GO_NEGATIVE_REGULATION_OF_LEUKOCYTE_DIFFERENTIATION	-0.464181	0.0243902	0.0935575
GO_CELLULAR_MACROMOLECULE_CATABOLIC_PROCESS	-0.259309	0	0.0955807
GO_TRANSLATION_REGULATOR_ACTIVITY_NUCLEIC_ACID_BINDING	-0.423148	0.0120482	0.0960025
GO_IMMUNE_RECEPTOR_ACTIVITY	-0.436706	0.0260586	0.0965353
GO_POSITIVE_REGULATION_OF_INTERLEUKIN_6_PRODUCTION	-0.391429	0.0190476	0.104899
GO_INTERLEUKIN_1_BETA_PRODUCTION	-0.457729	0.0143678	0.109961
GO_NEGATIVE_REGULATION_OF_PEPTIDE_SECRETION	-0.448814	0.0172911	0.119885
GO_REGULATION_OF_LEUKOCYTE_PROLIFERATION	-0.348492	0.00732601	0.124313
GO_T_CELL_PROLIFERATION	-0.346167	0.0174825	0.128263
GO_CYTOKINE_RECEPTOR_ACTIVITY	-0.451461	0.0368272	0.129804
GO_MACROMOLECULE_CATABOLIC_PROCESS	-0.240571	0	0.133317
GO_REGULATION_OF_LEUKOCYTE_APOPTOTIC_PROCESS	-0.424811	0.0208955	0.134447
GO_TISSUE_REMODELING	-0.366184	0.0299625	0.134612
GO_POSITIVE_REGULATION_OF_APOPTOTIC_SIGNALING_PATHWAY	-0.367006	0.0243902	0.143368
GO_INTRINSIC_APOPTOTIC_SIGNALING_PATHWAY_BY_P53_CLASS_MEDIATOR	-0.432	0.0361446	0.147462
GO_CYTOKINE_BINDING	-0.40311	0.0450161	0.154935
GO_LEUKOCYTE_APOPTOTIC_PROCESS	-0.405014	0.0353698	0.156704
GO_INTRACELLULAR_PROTEIN_TRANSPORT	-0.247645	0	0.156854
GO_REGULATION_OF_NIK_NF_KAPPAB_SIGNALING	-0.420284	0.0495627	0.165531
GO_CYTOPLASMIC_SIDE_OF_MEMBRANE	-0.358949	0.0421456	0.165625
GO_INTEGRIN_BINDING	-0.364113	0.0264901	0.165741
GO_POSITIVE_REGULATION_OF_CELL_ACTIVATION	-0.286655	0.0143541	0.172675
GO_DEVELOPMENTAL_PROCESS_INVOLVED_IN_REPRODUCTION	-0.284477	0.00578035	0.174142
GO_NEURON_TO_NEURON_SYNAPSE	-0.312842	0.0226244	0.174422
GO_REGULATION_OF_B_CELL_ACTIVATION	-0.378626	0.0528053	0.175659
GO_REGULATION_OF_LYMPHOCYTE_ACTIVATION	-0.272444	0.0142857	0.18337
GO_SIDE_OF_MEMBRANE	-0.287201	0.0147059	0.183561
GO_REGULATION_OF_PRODUCTION_OF_MOLECULAR_MEDIATOR_OF_IMMUNE_RESPONSE	-0.391153	0.0453258	0.18511
GO_REGULATION_OF_APOPTOTIC_SIGNALING_PATHWAY	-0.295118	0.0227273	0.185921
GO_NEGATIVE_REGULATION_OF_APOPTOTIC_SIGNALING_PATHWAY	-0.324179	0.0413534	0.193787
GO_INTEGRIN_MEDIATED_SIGNALING_PATHWAY	-0.384745	0.0469799	0.194526
GO_REGULATION_OF_PEPTIDE_SECRETION	-0.27812	0.0268817	0.194575
GO_LEUKOCYTE_MEDIATED_IMMUNITY	-0.238643	0	0.196032
GO_CALCIUM_MEDIATED_SIGNALING	-0.353367	0.0440678	0.197326
GO_TISSUE_HOMEOSTASIS	-0.380069	0.0756303	0.20059
GO_MACROPHAGE_MIGRATION	-0.397033	0.0828026	0.202327
GO_CYTOKINE_SECRETION	-0.306042	0.0306513	0.20256
GO_CYTOSOLIC_CALCIUM_ION_TRANSPORT	-0.414288	0.0586592	0.203977
GO_CELL_JUNCTION	-0.227665	0.010101	0.205669
GO_REGULATION_OF_REACTIVE_OXYGEN_SPECIES_BIOSYNTHETIC_PROCESS	-0.392485	0.0625	0.206479
GO_ANCHORING_JUNCTION	-0.239062	0.00900901	0.206951
GO_POSITIVE_REGULATION_OF_PEPTIDE_SECRETION	-0.289975	0.0295359	0.207911
GO_LYMPHOCYTE_MEDIATED_IMMUNITY	-0.346563	0.0578231	0.209361
GO_RNA_BINDING	-0.209861	0	0.214383
GO_EXTRACELLULAR_STRUCTURE_ORGANIZATION	-0.325973	0.0701754	0.220851
GO_POSITIVE_REGULATION_OF_LEUKOCYTE_CELL_CELL_ADHESION	-0.319427	0.03861	0.221203
GO_CELLULAR_MACROMOLECULE_LOCALIZATION	-0.211905	0	0.224559
GO_MAINTENANCE_OF_LOCATION	-0.2887	0.0384615	0.225495
GO_REGULATION_OF_LIPID_BIOSYNTHETIC_PROCESS	-0.400625	0.0843373	0.226722
GO_REGULATION_OF_CYTOSOLIC_CALCIUM_ION_CONCENTRATION	-0.306194	0.0421456	0.22723
GO_POSITIVE_REGULATION_OF_ION_TRANSPORT	-0.3278	0.0510204	0.228483
GO_TRANSLATIONAL_ELONGATION	-0.378553	0.0699088	0.231791
GO_MALE_GAMETE_GENERATION	-0.337505	0.0654762	0.233029
GO_POSITIVE_REGULATION_OF_CELL_CELL_ADHESION	-0.293365	0.0546875	0.248047
GO_REGULATION_OF_CELL_ACTIVATION	-0.236804	0.0240964	0.250769
GO_REGULATION_OF_ION_TRANSPORT	-0.253159	0.0341463	0.259069
GO_POSITIVE_REGULATION_OF_SMALL_MOLECULE_METABOLIC_PROCESS	-0.380214	0.0963855	0.260013
GO_INTERLEUKIN_1_PRODUCTION	-0.35688	0.0909091	0.264985
GO_REGULATION_OF_LIPID_METABOLIC_PROCESS	-0.300408	0.0636704	0.272705
GO_MAINTENANCE_OF_LOCATION_IN_CELL	-0.400117	0.10585	0.273055
GO_REACTIVE_OXYGEN_SPECIES_BIOSYNTHETIC_PROCESS	-0.35603	0.120915	0.291458
GO_REACTIVE_NITROGEN_SPECIES_METABOLIC_PROCESS	-0.375958	0.103152	0.292431
GO_CELL_CELL_JUNCTION_ORGANIZATION	-0.336024	0.0875421	0.292741
GO_GLIOGENESIS	-0.290346	0.0733591	0.299628
GO_HOMEOSTASIS_OF_NUMBER_OF_CELLS	-0.287401	0.0940171	0.303503
GO_SECOND_MESSENGER_MEDIATED_SIGNALING	-0.283948	0.0878661	0.306514
GO_POSITIVE_REGULATION_OF_CHEMOTAXIS	-0.319913	0.112957	0.312216
GO_NEUROTRANSMITTER_METABOLIC_PROCESS	-0.373661	0.117994	0.316843
GO_CARBOHYDRATE_CATABOLIC_PROCESS	-0.357048	0.116667	0.318131
GO_RESPONSE_TO_TRANSFORMING_GROWTH_FACTOR_BETA	-0.276077	0.110619	0.321096
GO_REGULATION_OF_SIGNAL_TRANSDUCTION_BY_P53_CLASS_MEDIATOR	-0.322911	0.123418	0.323709
GO_MULTI_ORGANISM_REPRODUCTIVE_PROCESS	-0.243804	0.05	0.323822
GO_ICOSANOID_METABOLIC_PROCESS	-0.358006	0.118644	0.324505
GO_REGULATION_OF_LYMPHOCYTE_MEDIATED_IMMUNITY	-0.357729	0.127536	0.324685
GO_CONTRACTILE_ACTIN_FILAMENT_BUNDLE_ASSEMBLY	-0.371958	0.104956	0.325071
GO_CYTOKINE_PRODUCTION_INVOLVED_IN_IMMUNE_RESPONSE	-0.350353	0.129032	0.325396
GO_POSITIVE_REGULATION_OF_LEUKOCYTE_MIGRATION	-0.302723	0.0960854	0.325461
GO_REGULATION_OF_NEUROTRANSMITTER_LEVELS	-0.307562	0.108772	0.325546
GO_NEGATIVE_REGULATION_OF_TRANSMEMBRANE_RECEPTOR_PROTEIN_SERINE_THREONINE_KINASE_SIGNALING_PATHWAY	-0.35722	0.12462	0.326866
GO_CELL_ACTIVATION_INVOLVED_IN_IMMUNE_RESPONSE	-0.209554	0.0186916	0.327703
GO_REGULATION_OF_INTRINSIC_APOPTOTIC_SIGNALING_PATHWAY	-0.298433	0.109966	0.327864
GO_PLASMA_MEMBRANE_SIGNALING_RECEPTOR_COMPLEX	-0.347423	0.11838	0.329559
GO_MYELOID_LEUKOCYTE_ACTIVATION	-0.20447	0.0188679	0.329914
GO_CELL_ACTIVATION	-0.192861	0.0188679	0.331025
GO_POSITIVE_REGULATION_OF_NF_KAPPAB_TRANSCRIPTION_FACTOR_ACTIVITY	-0.356069	0.137072	0.331387
GO_POSITIVE_REGULATION_OF_I_KAPPAB_KINASE_NF_KAPPAB_SIGNALING	-0.290924	0.12963	0.332314
GO_POSITIVE_REGULATION_OF_CYTOKINE_BIOSYNTHETIC_PROCESS	-0.371296	0.136612	0.333489
GO_REGULATION_OF_CELLULAR_KETONE_METABOLIC_PROCESS	-0.32846	0.145833	0.333658
GO_RESPIRATORY_ELECTRON_TRANSPORT_CHAIN	-0.316537	0.117057	0.333684
GO_MULTICELLULAR_ORGANISM_REPRODUCTION	-0.25489	0.1	0.334237
GO_REGULATION_OF_TRANS_SYNAPTIC_SIGNALING	-0.290254	0.100402	0.334591
GO_RESPIRASOME	-0.315115	0.131579	0.335992
GO_ORGANELLE_ASSEMBLY	-0.238822	0.100457	0.342564
GO_NEGATIVE_REGULATION_OF_TRANSMEMBRANE_TRANSPORT	-0.37815	0.175	0.343625
GO_RIBOSE_PHOSPHATE_BIOSYNTHETIC_PROCESS	-0.306054	0.101351	0.345539
GO_PEPTIDE_SECRETION	-0.219846	0.0726257	0.347596
GO_POSITIVE_REGULATION_OF_LEUKOCYTE_CHEMOTAXIS	-0.32622	0.139159	0.348161
GO_RECEPTOR_COMPLEX	-0.271462	0.10687	0.349565
GO_MYELOID_LEUKOCYTE_MEDIATED_IMMUNITY	-0.209272	0.0387597	0.354176
GO_SEXUAL_REPRODUCTION	-0.250144	0.107843	0.354783
GO_POSITIVE_REGULATION_OF_MAP_KINASE_ACTIVITY	-0.271156	0.150943	0.355038
GO_FATTY_ACID_DERIVATIVE_BIOSYNTHETIC_PROCESS	-0.350401	0.164773	0.35608
GO_REGULATION_OF_REACTIVE_OXYGEN_SPECIES_METABOLIC_PROCESS	-0.277194	0.122047	0.356238
GO_APOPTOTIC_SIGNALING_PATHWAY	-0.22619	0.115646	0.356253
GO_REGULATION_OF_SYNAPTIC_PLASTICITY	-0.35854	0.170659	0.35839
GO_SYNAPSE	-0.205855	0.0534351	0.369087
GO_ATP_SYNTHESIS_COUPLED_ELECTRON_TRANSPORT	-0.314902	0.160606	0.37189
GO_OXIDOREDUCTASE_COMPLEX	-0.31469	0.173077	0.373083
GO_NEGATIVE_REGULATION_OF_CELLULAR_RESPONSE_TO_TRANSFORMING_GROWTH_FACTOR_BETA_STIMULUS	-0.342256	0.169935	0.373792
GO_POSITIVE_REGULATION_OF_PROTEIN_KINASE_B_SIGNALING	-0.313094	0.175926	0.377394
GO_LIPOPOLYSACCHARIDE_MEDIATED_SIGNALING_PATHWAY	-0.315969	0.176292	0.377567
GO_ACTIN_FILAMENT_POLYMERIZATION	-0.270249	0.137809	0.380897
GO_MITOCHONDRIAL_PROTEIN_COMPLEX	-0.278728	0.174242	0.382521
GO_CELL_CELL_ADHESION	-0.214768	0.0855263	0.382947
GO_OXIDATIVE_PHOSPHORYLATION	-0.285135	0.184466	0.393852
GO_RESPIRATORY_CHAIN_COMPLEX	-0.314266	0.185065	0.395544
GO_NEUROINFLAMMATORY_RESPONSE	-0.349327	0.177843	0.401086
GO_ACTOMYOSIN_STRUCTURE_ORGANIZATION	-0.296164	0.173913	0.404112
GO_FICOLIN_1_RICH_GRANULE	-0.262178	0.163121	0.406614
GO_REGULATION_OF_LIPID_TRANSPORT	-0.348982	0.197832	0.406849
GO_B_CELL_ACTIVATION	-0.251163	0.148594	0.407297
GO_REGULATION_OF_T_CELL_ACTIVATION	-0.245345	0.128	0.408781
GO_ACTIVATION_OF_MAPK_ACTIVITY	-0.307839	0.164134	0.411301
GO_SYNAPTIC_SIGNALING	-0.2389	0.152381	0.412958
GO_NEGATIVE_REGULATION_OF_SECRETION	-0.281904	0.190141	0.413124
GO_MITOCHONDRIAL_MEMBRANE_ORGANIZATION	-0.342596	0.204545	0.419885
GO_REGULATION_OF_SECRETION	-0.203136	0.107914	0.436462
GO_POSITIVE_REGULATION_OF_CYTOKINE_PRODUCTION	-0.209126	0.128834	0.439977
GO_HORMONE_METABOLIC_PROCESS	-0.328546	0.216463	0.44073
GO_POSTSYNAPSE	-0.215369	0.119792	0.441268
GO_INTRACELLULAR_TRANSPORT	-0.172569	0.0588235	0.441623
GO_CELLULAR_KETONE_METABOLIC_PROCESS	-0.292407	0.214286	0.443403
GO_NEGATIVE_REGULATION_OF_CELLULAR_RESPONSE_TO_GROWTH_FACTOR_STIMULUS	-0.294401	0.232258	0.444613
GO_PROTEIN_PROCESSING	-0.302089	0.20625	0.446603
GO_MULTI_MULTICELLULAR_ORGANISM_PROCESS	-0.301347	0.224852	0.451206
GO_INNER_MITOCHONDRIAL_MEMBRANE_PROTEIN_COMPLEX	-0.313844	0.226866	0.452587
GO_POSITIVE_REGULATION_OF_LYMPHOCYTE_DIFFERENTIATION	-0.332835	0.235127	0.452935
GO_POSITIVE_REGULATION_OF_NERVOUS_SYSTEM_DEVELOPMENT	-0.23784	0.196429	0.453235
GO_LYSOSOMAL_LUMEN	-0.296518	0.237179	0.456216
GO_POSITIVE_REGULATION_OF_DNA_BINDING_TRANSCRIPTION_FACTOR_ACTIVITY	-0.272331	0.233677	0.457894
GO_PROTEIN_POLYMERIZATION	-0.246433	0.229323	0.457935
GO_NEGATIVE_REGULATION_OF_TRANSPORT	-0.215197	0.183962	0.458138
GO_LEUKOCYTE_CELL_CELL_ADHESION	-0.224127	0.175	0.458578
GO_ACTIN_FILAMENT	-0.309135	0.233333	0.460104
GO_SKELETAL_SYSTEM_MORPHOGENESIS	-0.308759	0.242991	0.461725
GO_MOLECULAR_TRANSDUCER_ACTIVITY	-0.206807	0.142045	0.461747
GO_CELLULAR_LIPID_CATABOLIC_PROCESS	-0.314896	0.23839	0.461902
GO_REGULATION_OF_LYMPHOCYTE_DIFFERENTIATION	-0.265548	0.22963	0.462227
GO_REGULATION_OF_CATION_TRANSMEMBRANE_TRANSPORT	-0.253419	0.194553	0.46223
GO_REGULATION_OF_CELLULAR_RESPONSE_TO_GROWTH_FACTOR_STIMULUS	-0.251766	0.203065	0.464163
GO_PURINE_CONTAINING_COMPOUND_BIOSYNTHETIC_PROCESS	-0.268255	0.258389	0.465234
GO_ACTIN_FILAMENT_BUNDLE_ORGANIZATION	-0.289608	0.228669	0.465775
GO_REACTIVE_OXYGEN_SPECIES_METABOLIC_PROCESS	-0.224723	0.207317	0.466019
GO_PROTEIN_CONTAINING_COMPLEX_BINDING	-0.179634	0.106796	0.46633
GO_POSITIVE_REGULATION_OF_INTRINSIC_APOPTOTIC_SIGNALING_PATHWAY	-0.323938	0.26506	0.466823
GO_LYMPHOCYTE_ACTIVATION	-0.189857	0.171429	0.4682
GO_T_CELL_ACTIVATION_INVOLVED_IN_IMMUNE_RESPONSE	-0.32063	0.255014	0.468646
GO_CARDIAC_VENTRICLE_DEVELOPMENT	-0.326424	0.271186	0.468724
GO_NIK_NF_KAPPAB_SIGNALING	-0.270799	0.216607	0.469408
GO_BEHAVIOR	-0.224345	0.203704	0.470023
GO_EXTRINSIC_COMPONENT_OF_PLASMA_MEMBRANE	-0.297365	0.244373	0.470737
GO_PLASMA_MEMBRANE_PROTEIN_COMPLEX	-0.223	0.216216	0.471513
GO_POSITIVE_REGULATION_OF_ESTABLISHMENT_OF_PROTEIN_LOCALIZATION	-0.21438	0.210526	0.47529
GO_FATTY_ACID_DERIVATIVE_METABOLIC_PROCESS	-0.286055	0.271566	0.47583
GO_SMAD_BINDING	-0.326721	0.281346	0.476138
GO_FATTY_ACID_BIOSYNTHETIC_PROCESS	-0.294809	0.246795	0.476188
GO_CELLULAR_PROTEIN_CONTAINING_COMPLEX_ASSEMBLY	-0.1906	0.145038	0.476224
GO_PHAGOCYTOSIS	-0.210596	0.206186	0.476427
GO_ANATOMICAL_STRUCTURE_HOMEOSTASIS	-0.239098	0.231061	0.476539
GO_MITOCHONDRIAL_TRANSPORT	-0.262661	0.253571	0.477139
GO_SUPRAMOLECULAR_FIBER_ORGANIZATION	-0.200642	0.179775	0.477653
GO_ACTIN_FILAMENT_ORGANIZATION	-0.218963	0.22381	0.492579
GO_TRANSFERASE_COMPLEX_TRANSFERRING_PHOSPHORUS_CONTAINING_GROUPS	-0.300312	0.305466	0.495159
GO_COLLAGEN_BINDING	-0.323318	0.307479	0.497048
GO_SKELETAL_SYSTEM_DEVELOPMENT	-0.230523	0.220264	0.498
GO_ENDOPEPTIDASE_ACTIVITY	-0.256603	0.282609	0.4986
GO_I_KAPPAB_KINASE_NF_KAPPAB_SIGNALING	-0.223912	0.269231	0.503022
GO_TRANSFORMING_GROWTH_FACTOR_BETA_RECEPTOR_SIGNALING_PATHWAY	-0.242133	0.285211	0.517896
GO_DNA_DAMAGE_RESPONSE_SIGNAL_TRANSDUCTION_BY_P53_CLASS_MEDIATOR	-0.306999	0.288	0.52019
GO_TRANSCRIPTION_COREPRESSOR_ACTIVITY	-0.298212	0.305733	0.531354
GO_GTPASE_ACTIVITY	-0.224316	0.297414	0.533039
GO_SUPEROXIDE_METABOLIC_PROCESS	-0.311843	0.329114	0.544479
GO_NEGATIVE_REGULATION_OF_ESTABLISHMENT_OF_PROTEIN_LOCALIZATION	-0.278665	0.333333	0.556785
GO_REGULATION_OF_ION_TRANSMEMBRANE_TRANSPORT	-0.221521	0.308943	0.556923
GO_NUCLEOLUS	-0.185028	0.248322	0.557243
GO_NEGATIVE_REGULATION_OF_PROTEIN_MODIFICATION_BY_SMALL_PROTEIN_CONJUGATION_OR_REMOVAL	-0.280275	0.325373	0.558845
GO_POSITIVE_REGULATION_OF_CELL_DEVELOPMENT	-0.204421	0.347826	0.560397
GO_ACTIN_POLYMERIZATION_OR_DEPOLYMERIZATION	-0.236693	0.307692	0.561401
GO_POSITIVE_REGULATION_OF_JNK_CASCADE	-0.281756	0.31068	0.562609
GO_REGULATION_OF_TRANSMEMBRANE_TRANSPORT	-0.215708	0.311628	0.563927
GO_VASCULAR_ENDOTHELIAL_GROWTH_FACTOR_RECEPTOR_SIGNALING_PATHWAY	-0.272403	0.349515	0.564019
GO_DETECTION_OF_STIMULUS	-0.266484	0.328173	0.56801
GO_PROTEIN_ACYLATION	-0.283602	0.330159	0.577584
GO_NEGATIVE_REGULATION_OF_HEMOPOIESIS	-0.26449	0.334495	0.580261
GO_REGULATION_OF_ESTABLISHMENT_OF_PROTEIN_LOCALIZATION	-0.184918	0.301775	0.581292
GO_REGULATION_OF_SUPRAMOLECULAR_FIBER_ORGANIZATION	-0.206898	0.336283	0.582225
GO_POSITIVE_REGULATION_OF_CELL_ADHESION	-0.205734	0.340807	0.582282
GO_POSITIVE_REGULATION_OF_SECRETION	-0.19683	0.326531	0.583444
GO_RIBONUCLEOSIDE_TRIPHOSPHATE_BIOSYNTHETIC_PROCESS	-0.299472	0.352778	0.584901
GO_AEROBIC_RESPIRATION	-0.255952	0.388199	0.595004
GO_AZUROPHIL_GRANULE	-0.217143	0.360153	0.603751
GO_SIGNAL_TRANSDUCTION_IN_RESPONSE_TO_DNA_DAMAGE	-0.291526	0.384848	0.603781
GO_GLIAL_CELL_DEVELOPMENT	-0.292597	0.35942	0.604611
GO_CARDIAC_CHAMBER_MORPHOGENESIS	-0.288136	0.373219	0.604614
GO_REGULATION_OF_T_CELL_DIFFERENTIATION	-0.269501	0.362275	0.605377
GO_REGULATION_OF_CELLULAR_RESPONSE_TO_TRANSFORMING_GROWTH_FACTOR_BETA_STIMULUS	-0.253999	0.355172	0.608846
GO_POSITIVE_REGULATION_OF_MITOTIC_CELL_CYCLE	-0.278329	0.351744	0.609966
GO_LIPID_LOCALIZATION	-0.225202	0.371648	0.610608
GO_NUCLEOSIDE_TRIPHOSPHATE_BIOSYNTHETIC_PROCESS	-0.299472	0.377778	0.611098
GO_POSITIVE_REGULATION_OF_PROTEIN_SERINE_THREONINE_KINASE_ACTIVITY	-0.208992	0.375494	0.611449
GO_NEGATIVE_REGULATION_OF_CELLULAR_COMPONENT_ORGANIZATION	-0.182252	0.368715	0.611637
GO_SECRETORY_GRANULE_MEMBRANE	-0.189153	0.40566	0.6127
GO_POSITIVE_REGULATION_OF_CELL_CYCLE_PROCESS	-0.233791	0.370242	0.61276
GO_REGULATION_OF_MAP_KINASE_ACTIVITY	-0.210193	0.37963	0.613457
GO_SIGNAL_TRANSDUCTION_BY_P53_CLASS_MEDIATOR	-0.228996	0.4	0.613468
GO_REGULATION_OF_PROTEIN_LOCALIZATION	-0.165998	0.313043	0.614492
GO_REGULATION_OF_CHROMATIN_ORGANIZATION	-0.29644	0.390029	0.615051
GO_EMBRYONIC_MORPHOGENESIS	-0.203098	0.381166	0.615082
GO_MORPHOGENESIS_OF_A_BRANCHING_STRUCTURE	-0.279015	0.39886	0.615248
GO_G_PROTEIN_COUPLED_RECEPTOR_ACTIVITY	-0.25667	0.385906	0.615769
GO_PHOSPHOLIPID_BIOSYNTHETIC_PROCESS	-0.287526	0.405573	0.616014
GO_ACTIVATION_OF_PROTEIN_KINASE_ACTIVITY	-0.202984	0.416667	0.616994
GO_POSITIVE_REGULATION_OF_CYSTEINE_TYPE_ENDOPEPTIDASE_ACTIVITY	-0.279117	0.379939	0.617497
GO_REGULATION_OF_LIPID_LOCALIZATION	-0.26822	0.406627	0.617855
GO_POSITIVE_REGULATION_OF_SUPRAMOLECULAR_FIBER_ORGANIZATION	-0.221693	0.376923	0.618154
GO_APOPTOTIC_MITOCHONDRIAL_CHANGES	-0.289723	0.409605	0.620856
GO_POSITIVE_REGULATION_OF_CELL_CYCLE	-0.217415	0.410345	0.622297
GO_CELLULAR_RESPIRATION	-0.215281	0.41502	0.623995
GO_REGULATION_OF_PROTEIN_MODIFICATION_BY_SMALL_PROTEIN_CONJUGATION_OR_REMOVAL	-0.217416	0.423529	0.624535
GO_CELL_RECOGNITION	-0.261611	0.39233	0.624794
GO_ENDOTHELIUM_DEVELOPMENT	-0.275329	0.417367	0.625158
GO_REGULATION_OF_CALCIUM_ION_TRANSPORT	-0.233811	0.362712	0.626224
GO_CELLULAR_COMPONENT_DISASSEMBLY	-0.186024	0.430556	0.628079
GO_POSITIVE_REGULATION_OF_STRESS_ACTIVATED_PROTEIN_KINASE_SIGNALING_CASCADE	-0.244181	0.431373	0.628335
GO_REGULATION_OF_ACTIN_FILAMENT_BUNDLE_ASSEMBLY	-0.286168	0.415698	0.629569
GO_CARBOHYDRATE_DERIVATIVE_CATABOLIC_PROCESS	-0.234042	0.407018	0.631054
GO_FEMALE_PREGNANCY	-0.26021	0.442197	0.634788
GO_EXTRINSIC_COMPONENT_OF_MEMBRANE	-0.226383	0.425606	0.637412
GO_REGULATION_OF_ACTOMYOSIN_STRUCTURE_ORGANIZATION	-0.282384	0.429825	0.640575
GO_NEGATIVE_REGULATION_OF_SUPRAMOLECULAR_FIBER_ORGANIZATION	-0.273265	0.442478	0.645471
GO_AZUROPHIL_GRANULE_LUMEN	-0.248155	0.453453	0.645688
GO_MONOCARBOXYLIC_ACID_BIOSYNTHETIC_PROCESS	-0.230981	0.457516	0.645886
GO_REGULATION_OF_RESPONSE_TO_DNA_DAMAGE_STIMULUS	-0.243528	0.47619	0.647168
GO_POSITIVE_REGULATION_OF_VIRAL_PROCESS	-0.260019	0.434251	0.648654
GO_EPITHELIAL_TUBE_MORPHOGENESIS	-0.213886	0.466667	0.65147
GO_REGULATION_OF_CALCIUM_MEDIATED_SIGNALING	-0.275624	0.439024	0.653084
GO_CARDIAC_SEPTUM_DEVELOPMENT	-0.264342	0.448071	0.663089
GO_PROTEIN_MATURATION	-0.22483	0.472313	0.664889
GO_NEGATIVE_REGULATION_OF_MAP_KINASE_ACTIVITY	-0.278463	0.460452	0.667271
GO_REGULATION_OF_DNA_BINDING_TRANSCRIPTION_FACTOR_ACTIVITY	-0.186431	0.482051	0.671203
GO_REGULATION_OF_PROTEIN_POLYMERIZATION	-0.203664	0.462121	0.679175
GO_REGULATION_OF_METAL_ION_TRANSPORT	-0.193669	0.486166	0.680087
GO_CARDIAC_CHAMBER_DEVELOPMENT	-0.241564	0.467797	0.680249
GO_CELL_JUNCTION_ORGANIZATION	-0.205994	0.5	0.684565
GO_PEPTIDASE_ACTIVITY	-0.196365	0.498008	0.693992
GO_EMBRYONIC_ORGAN_MORPHOGENESIS	-0.246689	0.478964	0.694111
GO_REGULATION_OF_NUCLEAR_DIVISION	-0.27249	0.5	0.695217
GO_NEGATIVE_REGULATION_OF_PROTEIN_CONTAINING_COMPLEX_ASSEMBLY	-0.251161	0.502959	0.696836
GO_NEGATIVE_REGULATION_OF_PROTEIN_SERINE_THREONINE_KINASE_ACTIVITY	-0.247337	0.507599	0.697822
GO_POSITIVE_REGULATION_OF_CELL_GROWTH	-0.233742	0.495082	0.69886
GO_CELL_ADHESION_MOLECULE_BINDING	-0.161909	0.522876	0.700114
GO_RNA_EXPORT_FROM_NUCLEUS	-0.249908	0.520376	0.711211
GO_ACTIN_FILAMENT_BASED_PROCESS	-0.162699	0.553333	0.714226
GO_COGNITION	-0.215162	0.528662	0.719418
GO_POSITIVE_REGULATION_OF_CELLULAR_PROTEIN_LOCALIZATION	-0.189137	0.556034	0.726199
GO_REGULATION_OF_TRANSMEMBRANE_RECEPTOR_PROTEIN_SERINE_THREONINE_KINASE_SIGNALING_PATHWAY	-0.214055	0.57037	0.739065
GO_SPLICEOSOMAL_COMPLEX	-0.245296	0.561933	0.739849
GO_REGULATION_OF_CALCIUM_ION_TRANSMEMBRANE_TRANSPORT	-0.256367	0.512821	0.741826
GO_NEUROTRANSMITTER_TRANSPORT	-0.244256	0.507553	0.742141
GO_DENDRITE_DEVELOPMENT	-0.223425	0.532308	0.74796
GO_PROTON_TRANSMEMBRANE_TRANSPORT	-0.208619	0.553957	0.748065
GO_REGULATION_OF_ACTIN_FILAMENT_ORGANIZATION	-0.188963	0.54065	0.748668
GO_GASTRULATION	-0.23266	0.52459	0.749091
GO_REGULATION_OF_PROTEIN_CONTAINING_COMPLEX_ASSEMBLY	-0.17872	0.57551	0.749265
GO_REGULATION_OF_PROTEIN_BINDING	-0.204934	0.555556	0.755868
GO_ELECTRON_TRANSFER_ACTIVITY	-0.20969	0.575092	0.758045
GO_PROTEIN_LOCALIZATION_TO_MITOCHONDRION	-0.249564	0.540786	0.758525
GO_GOLGI_ASSOCIATED_VESICLE	-0.250286	0.573134	0.759102
GO_REGULATION_OF_INSULIN_SECRETION	-0.228464	0.552326	0.760574
GO_CYSTEINE_TYPE_PEPTIDASE_ACTIVITY	-0.251406	0.5727	0.761933
GO_FATTY_ACID_METABOLIC_PROCESS	-0.200509	0.600733	0.774383
GO_MYELOID_CELL_HOMEOSTASIS	-0.198074	0.595041	0.774921
GO_ELECTRON_TRANSPORT_CHAIN	-0.194559	0.633065	0.775595
GO_INTERLEUKIN_1_MEDIATED_SIGNALING_PATHWAY	-0.22467	0.613333	0.775744
GO_POSITIVE_REGULATION_OF_PROTEIN_LOCALIZATION_TO_MEMBRANE	-0.255133	0.581121	0.779277
GO_TUBE_FORMATION	-0.242317	0.604575	0.788484
GO_GROWTH_FACTOR_RECEPTOR_BINDING	-0.232159	0.597183	0.792927
GO_GLIAL_CELL_DIFFERENTIATION	-0.209331	0.619672	0.793849
GO_TUBULIN_BINDING	-0.223341	0.621451	0.795522
GO_REGULATION_OF_ANTIGEN_RECEPTOR_MEDIATED_SIGNALING_PATHWAY	-0.242632	0.585831	0.796196
GO_POSITIVE_REGULATION_OF_ORGANELLE_ORGANIZATION	-0.153271	0.736041	0.822403
GO_REGULATION_OF_PROTEIN_STABILITY	-0.168484	0.686992	0.830802
GO_TRANSMEMBRANE_RECEPTOR_PROTEIN_SERINE_THREONINE_KINASE_SIGNALING_PATHWAY	-0.171603	0.710145	0.833301
GO_PROTEIN_STABILIZATION	-0.184808	0.668942	0.835143
GO_REGULATION_OF_ALPHA_BETA_T_CELL_ACTIVATION	-0.232111	0.621469	0.835543
GO_POSITIVE_REGULATION_OF_CYTOSKELETON_ORGANIZATION	-0.179958	0.726592	0.835758
GO_MITOCHONDRIAL_RESPIRATORY_CHAIN_COMPLEX_ASSEMBLY	-0.241287	0.652291	0.835948
GO_REGULATION_OF_CELLULAR_COMPONENT_BIOGENESIS	-0.144938	0.746377	0.837494
GO_RIBONUCLEOSIDE_TRIPHOSPHATE_METABOLIC_PROCESS	-0.230367	0.63344	0.837566
GO_ACTIN_CYTOSKELETON	-0.159986	0.723618	0.837682
GO_SEX_DIFFERENTIATION	-0.201309	0.696864	0.838893
GO_ROUGH_ENDOPLASMIC_RETICULUM	-0.210958	0.692557	0.844652
GO_FC_RECEPTOR_MEDIATED_STIMULATORY_SIGNALING_PATHWAY	-0.207387	0.706714	0.859297
GO_GLYCEROLIPID_METABOLIC_PROCESS	-0.187375	0.683871	0.859361
GO_NUCLEOSIDE_PHOSPHATE_BIOSYNTHETIC_PROCESS	-0.181749	0.70318	0.860907
GO_REGULATION_OF_PROTEIN_SERINE_THREONINE_KINASE_ACTIVITY	-0.148356	0.782123	0.861777
GO_NEGATIVE_REGULATION_OF_INTRINSIC_APOPTOTIC_SIGNALING_PATHWAY	-0.229781	0.717579	0.862667
GO_SYNAPSE_ORGANIZATION	-0.17782	0.707865	0.863869
GO_GENERATION_OF_PRECURSOR_METABOLITES_AND_ENERGY	-0.144936	0.821622	0.865921
GO_TRANSFERASE_ACTIVITY_TRANSFERRING_HEXOSYL_GROUPS	-0.203979	0.687697	0.866201
GO_RESPONSE_TO_INTERLEUKIN_12	-0.214548	0.731989	0.867173
GO_POSITIVE_REGULATION_OF_CHROMOSOME_ORGANIZATION	-0.210741	0.689024	0.867753
GO_POSITIVE_REGULATION_OF_GROWTH	-0.173346	0.766423	0.878587
GO_SIGNAL_RELEASE	-0.154675	0.729614	0.878887
GO_POSITIVE_REGULATION_OF_PROTEIN_BINDING	-0.216521	0.712074	0.880344
GO_HEMATOPOIETIC_PROGENITOR_CELL_DIFFERENTIATION	-0.186109	0.695804	0.88041
GO_EPITHELIAL_CELL_DEVELOPMENT	-0.202385	0.739274	0.881133
GO_JNK_CASCADE	-0.180404	0.741697	0.891815
GO_ACTIN_FILAMENT_BINDING	-0.187757	0.754325	0.892239
GO_INSULIN_RECEPTOR_SIGNALING_PATHWAY	-0.198291	0.726444	0.89325
GO_B_CELL_RECEPTOR_SIGNALING_PATHWAY	-0.210988	0.77381	0.893528
GO_MONOVALENT_INORGANIC_CATION_TRANSPORT	-0.147058	0.842105	0.894513
GO_CHROMATIN_ORGANIZATION	-0.153049	0.823529	0.894936
GO_PEPTIDYL_LYSINE_MODIFICATION	-0.185504	0.772414	0.895083
GO_REGULATION_OF_TRANSLATIONAL_INITIATION	-0.20685	0.76699	0.895594
GO_MAGNESIUM_ION_BINDING	-0.208725	0.703928	0.896679
GO_RUFFLE_MEMBRANE	-0.214845	0.735294	0.896868
GO_NUCLEOSIDE_TRIPHOSPHATASE_REGULATOR_ACTIVITY	-0.168257	0.793893	0.897249
GO_MITOCHONDRIAL_ENVELOPE	-0.131219	0.843931	0.899823
GO_ENERGY_DERIVATION_BY_OXIDATION_OF_ORGANIC_COMPOUNDS	-0.154754	0.807229	0.900728
GO_REGULATION_OF_CELL_PROJECTION_ASSEMBLY	-0.204215	0.730303	0.900964
GO_CALMODULIN_BINDING	-0.190546	0.785714	0.901381
GO_RNA_PROCESSING	-0.128091	0.905028	0.90192
GO_TRANSFERASE_ACTIVITY_TRANSFERRING_GLYCOSYL_GROUPS	-0.177407	0.79402	0.901999
GO_ANION_TRANSMEMBRANE_TRANSPORTER_ACTIVITY	-0.214182	0.755556	0.902563
GO_DNA_BINDING_TRANSCRIPTION_REPRESSOR_ACTIVITY	-0.205112	0.744745	0.902822
GO_CELL_AGING	-0.210822	0.773639	0.903245
GO_RIBONUCLEOPROTEIN_COMPLEX_BINDING	-0.189509	0.795796	0.910952
GO_CELL_BODY	-0.143163	0.882353	0.911513
GO_NEGATIVE_REGULATION_OF_INTRACELLULAR_SIGNAL_TRANSDUCTION	-0.13782	0.887255	0.912963
GO_CARBOHYDRATE_DERIVATIVE_METABOLIC_PROCESS	-0.118	0.909722	0.915239
GO_REGULATION_OF_PEPTIDE_HORMONE_SECRETION	-0.167987	0.829582	0.9217
GO_REGULATION_OF_PROTEIN_CATABOLIC_PROCESS	-0.13248	0.895288	0.922094
GO_ORGANOPHOSPHATE_BIOSYNTHETIC_PROCESS	-0.14095	0.862661	0.922148
GO_NEGATIVE_REGULATION_OF_TRANSFERASE_ACTIVITY	-0.147428	0.881423	0.923445
GO_COFACTOR_BIOSYNTHETIC_PROCESS	-0.156863	0.83737	0.923852
GO_TERTIARY_GRANULE_MEMBRANE	-0.197387	0.808023	0.924466
GO_TYPE_I_INTERFERON_PRODUCTION	-0.175999	0.83871	0.924547
GO_REGULATION_OF_HORMONE_SECRETION	-0.16555	0.813187	0.926134
GO_INSULIN_SECRETION	-0.168983	0.846939	0.933359
GO_POSITIVE_REGULATION_OF_PROTEIN_CATABOLIC_PROCESS	-0.151023	0.867384	0.933947
GO_REGULATION_OF_MITOCHONDRION_ORGANIZATION	-0.168	0.868687	0.94987
GO_COVALENT_CHROMATIN_MODIFICATION	-0.149893	0.891228	0.950971
GO_REGULATION_OF_CHROMOSOME_ORGANIZATION	-0.153856	0.872205	0.964061
GO_PROTEIN_MODIFICATION_BY_SMALL_PROTEIN_REMOVAL	-0.13887	0.918819	0.964749
GO_NEGATIVE_REGULATION_OF_PROTEIN_CATABOLIC_PROCESS	-0.160579	0.883959	0.965576
GO_EPITHELIAL_TUBE_FORMATION	-0.177101	0.86478	0.967372
GO_PROTEIN_SERINE_THREONINE_KINASE_ACTIVITY	-0.129988	0.939516	0.967671
GO_MORPHOGENESIS_OF_EMBRYONIC_EPITHELIUM	-0.177101	0.881657	0.967966
GO_RIBOSE_PHOSPHATE_METABOLIC_PROCESS	-0.127475	0.935622	0.968852
GO_DNA_CONFORMATION_CHANGE	-0.173826	0.863777	0.969671
GO_ANTIGEN_PROCESSING_AND_PRESENTATION_OF_EXOGENOUS_PEPTIDE_ANTIGEN_VIA_MHC_CLASS_I	-0.146174	0.900344	0.969728
GO_POSITIVE_REGULATION_OF_PROTEOLYSIS	-0.113649	0.965854	0.970201
GO_NEGATIVE_REGULATION_OF_CELLULAR_PROTEIN_CATABOLIC_PROCESS	-0.161923	0.922652	0.970443
GO_T_CELL_RECEPTOR_SIGNALING_PATHWAY	-0.135189	0.939286	0.971059
GO_OXIDATION_REDUCTION_PROCESS	-0.104226	0.982143	0.971539
GO_MONOSACCHARIDE_METABOLIC_PROCESS	-0.136782	0.910394	0.972216
GO_GLYCOSYL_COMPOUND_METABOLIC_PROCESS	-0.168383	0.927711	0.972246
GO_TELENCEPHALON_DEVELOPMENT	-0.152852	0.926686	0.972774
GO_HYDROLASE_ACTIVITY_ACTING_ON_ACID_ANHYDRIDES	-0.109321	0.993789	0.972839
GO_ANTIGEN_RECEPTOR_MEDIATED_SIGNALING_PATHWAY	-0.124408	0.968128	0.973089
GO_POSITIVE_REGULATION_OF_TRANSLATION	-0.147547	0.93871	0.973684
GO_POSITIVE_REGULATION_OF_PROTEIN_MODIFICATION_BY_SMALL_PROTEIN_CONJUGATION_OR_REMOVAL	-0.155471	0.926761	0.975008
GO_MRNA_BINDING	-0.118072	0.969957	0.975454
GO_FILOPODIUM	-0.169257	0.916667	0.976557
GO_PURINE_NUCLEOSIDE_TRIPHOSPHATE_METABOLIC_PROCESS	-0.138332	0.959866	0.981704
GO_REGULATION_OF_CELLULAR_PROTEIN_CATABOLIC_PROCESS	-0.110922	0.959108	0.986962
GO_NUCLEOSIDE_TRIPHOSPHATE_METABOLIC_PROCESS	-0.122548	0.962963	0.992891
GO_TELOMERE_ORGANIZATION	-0.13518	0.990854	0.994118
GO_MITOCHONDRIAL_MATRIX	-0.0964019	0.989091	0.994391
GO_MITOCHONDRION	-0.0741586	1	0.99479
GO_PROTEIN_CONTAINING_COMPLEX_LOCALIZATION	-0.103773	0.990099	0.995152
GO_ATP_METABOLIC_PROCESS	-0.0927693	0.995833	0.995746

## Sheet: C0 VS C6
GO UP in C0	ES	NOM p-val	FDR q-val
GO_EPITHELIAL_CELL_PROLIFERATION	0.508907	0.00164474	0.111287
GO_REGENERATION	0.585292	0.00361011	0.154345
GO_GLYCOSAMINOGLYCAN_BINDING	0.562359	0	0.280211
GO_AMEBOIDAL_TYPE_CELL_MIGRATION	0.432644	0.00325203	0.398348
GO_MONOVALENT_INORGANIC_CATION_HOMEOSTASIS	0.515238	0.0126126	0.424721
GO_DRUG_BINDING	0.351569	0	0.530275
GO_CIRCULATORY_SYSTEM_PROCESS	0.359517	0.0746753	0.574543
GO_REGULATION_OF_NEURON_PROJECTION_DEVELOPMENT	0.384889	0.0572391	0.575723
GO_CHROMOSOME	0.301742	0.0427632	0.580774
GO_SENSORY_ORGAN_DEVELOPMENT	0.390426	0.0648464	0.584205
GO_GLAND_DEVELOPMENT	0.360529	0.0653595	0.586636
GO_NEURON_DIFFERENTIATION	0.286791	0.0328125	0.589196
GO_SEQUENCE_SPECIFIC_DNA_BINDING	0.332677	0.0616883	0.590942
GO_GROWTH	0.281362	0.0845771	0.591909
GO_CARBOHYDRATE_BINDING	0.406129	0.126667	0.592488
GO_CARDIOVASCULAR_SYSTEM_DEVELOPMENT	0.285966	0.0876897	0.594877
GO_RESPONSE_TO_PEPTIDE	0.341396	0.0618892	0.595032
GO_KINASE_BINDING	0.289008	0.0690738	0.596397
GO_DNA_BINDING_TRANSCRIPTION_FACTOR_ACTIVITY_RNA_POLYMERASE_II_SPECIFIC	0.339952	0.0550775	0.597421
GO_PEPTIDASE_REGULATOR_ACTIVITY	0.349566	0.165794	0.599139
GO_GOLGI_VESICLE_TRANSPORT	0.333333	0.120603	0.599755
GO_TISSUE_MORPHOGENESIS	0.318205	0.171233	0.60043
GO_AXON_DEVELOPMENT	0.352686	0.0966667	0.601062
GO_CELL_DIVISION	0.298969	0.157191	0.601434
GO_VESICLE_ORGANIZATION	0.336847	0.128978	0.602127
GO_TUBE_DEVELOPMENT	0.273931	0.0873786	0.60332
GO_MUSCLE_SYSTEM_PROCESS	0.378082	0.096831	0.60378
GO_RESPONSE_TO_TOPOLOGICALLY_INCORRECT_PROTEIN	0.341214	0.176367	0.604387
GO_ENDOSOME_MEMBRANE	0.317766	0.0533118	0.604606
GO_REGULATION_OF_ANIMAL_ORGAN_MORPHOGENESIS	0.357322	0.174296	0.604778
GO_CELLULAR_RESPONSE_TO_TOPOLOGICALLY_INCORRECT_PROTEIN	0.341214	0.181658	0.604955
GO_RECEPTOR_COMPLEX	0.337262	0.196043	0.605003
GO_METAL_ION_TRANSPORT	0.283574	0.0849359	0.605246
GO_CALCIUM_ION_BINDING	0.291999	0.157807	0.605599
GO_PLASMA_MEMBRANE_REGION	0.267575	0.146067	0.605697
GO_ENDOPLASMIC_RETICULUM_UNFOLDED_PROTEIN_RESPONSE	0.361431	0.191667	0.605868
GO_TRANSITION_METAL_ION_BINDING	0.307461	0.0993378	0.606083
GO_PROTEIN_CONTAINING_COMPLEX_DISASSEMBLY	0.340854	0.165154	0.606263
GO_CELL_SUBSTRATE_ADHESION	0.372463	0.117021	0.606556
GO_ACTIVE_ION_TRANSMEMBRANE_TRANSPORTER_ACTIVITY	0.373898	0.129433	0.607039
GO_CELL_CELL_JUNCTION	0.360382	0.0879865	0.607235
GO_SMALL_GTPASE_BINDING	0.310509	0.161739	0.607362
GO_SKELETAL_SYSTEM_DEVELOPMENT	0.34729	0.0976909	0.607479
GO_CELLULAR_RESPONSE_TO_ACID_CHEMICAL	0.434177	0.0502693	0.607495
GO_MOLECULAR_TRANSDUCER_ACTIVITY	0.269226	0.169935	0.608054
GO_RESPONSE_TO_OXYGEN_LEVELS	0.283758	0.199021	0.608417
GO_SMALL_MOLECULE_METABOLIC_PROCESS	0.240368	0.0787519	0.608575
GO_ERBB_SIGNALING_PATHWAY	0.390767	0.126761	0.608708
GO_NEURON_DEVELOPMENT	0.252089	0.136066	0.609148
GO_TRANSITION_METAL_ION_TRANSPORT	0.35871	0.162832	0.609265
GO_DEVELOPMENTAL_GROWTH	0.298618	0.114192	0.609374
GO_TUBE_MORPHOGENESIS	0.255672	0.145136	0.609378
GO_ACTIVE_TRANSMEMBRANE_TRANSPORTER_ACTIVITY	0.387623	0.083045	0.609751
GO_RESPONSE_TO_KETONE	0.359768	0.161512	0.610343
GO_REGULATION_OF_ANATOMICAL_STRUCTURE_SIZE	0.289156	0.142105	0.611133
GO_PHOSPHATIDYLINOSITOL_BINDING	0.347116	0.118928	0.611246
GO_INTRINSIC_COMPONENT_OF_PLASMA_MEMBRANE	0.238181	0.164615	0.611277
GO_MOLECULAR_FUNCTION_REGULATOR	0.211838	0.157817	0.611509
GO_POSITIVE_REGULATION_OF_CELL_PROJECTION_ORGANIZATION	0.326865	0.171329	0.611597
GO_ENDOPEPTIDASE_REGULATOR_ACTIVITY	0.367187	0.138241	0.611635
GO_RESPONSE_TO_INSULIN	0.361176	0.156897	0.612254
GO_EPITHELIUM_DEVELOPMENT	0.289945	0.0499195	0.612463
GO_RESPONSE_TO_ENDOPLASMIC_RETICULUM_STRESS	0.306553	0.204878	0.612503
GO_RESPONSE_TO_HORMONE	0.261955	0.106416	0.613024
GO_REGULATION_OF_HYDROLASE_ACTIVITY	0.218253	0.157817	0.61385
GO_BLOOD_VESSEL_MORPHOGENESIS	0.275873	0.156051	0.613904
GO_NUCLEAR_CHROMOSOME	0.302954	0.104746	0.614336
GO_ENDOPLASMIC_RETICULUM_LUMEN	0.323184	0.0935484	0.614458
GO_ENDOTHELIAL_CELL_MIGRATION	0.392186	0.0607639	0.61488
GO_IMPORT_INTO_CELL	0.263273	0.0789474	0.615018
GO_ION_TRANSMEMBRANE_TRANSPORTER_ACTIVITY	0.307998	0.15935	0.615227
GO_MORPHOGENESIS_OF_AN_EPITHELIUM	0.35703	0.120603	0.615236
GO_SMALL_GTPASE_MEDIATED_SIGNAL_TRANSDUCTION	0.261952	0.17817	0.615371
GO_NEGATIVE_REGULATION_OF_CELL_ADHESION	0.334464	0.143824	0.6154
GO_ORGANONITROGEN_COMPOUND_CATABOLIC_PROCESS	0.244506	0.0573152	0.616845
GO_NEGATIVE_REGULATION_OF_TRANSCRIPTION_BY_RNA_POLYMERASE_II	0.29634	0.135762	0.617132
GO_ENDOMEMBRANE_SYSTEM_ORGANIZATION	0.339107	0.156406	0.617282
GO_EXTRACELLULAR_MATRIX	0.283815	0.193603	0.617636
GO_NEGATIVE_REGULATION_OF_RNA_BIOSYNTHETIC_PROCESS	0.266103	0.103339	0.61782
GO_MUSCLE_STRUCTURE_DEVELOPMENT	0.311718	0.145695	0.618227
GO_RESPONSE_TO_NITROGEN_COMPOUND	0.223084	0.168487	0.619026
GO_REGULATION_OF_CELL_POPULATION_PROLIFERATION	0.238153	0.0557276	0.619106
GO_ENDOSOME	0.261413	0.0444785	0.619164
GO_DNA_BINDING_TRANSCRIPTION_FACTOR_ACTIVITY	0.313832	0.0906149	0.620028
GO_CELL_PROJECTION_ORGANIZATION	0.251503	0.10479	0.62081
GO_RESPONSE_TO_WOUNDING	0.268432	0.131621	0.620812
GO_CELLULAR_RESPONSE_TO_NITROGEN_COMPOUND	0.267079	0.125	0.620989
GO_CIS_REGULATORY_REGION_BINDING	0.339941	0.147959	0.621505
GO_SEQUENCE_SPECIFIC_DOUBLE_STRANDED_DNA_BINDING	0.33523	0.0817391	0.621909
GO_TRANSCRIPTION_REGULATOR_ACTIVITY	0.254387	0.158497	0.62225
GO_REGULATION_OF_GROWTH	0.310766	0.0833333	0.623351
GO_ANATOMICAL_STRUCTURE_FORMATION_INVOLVED_IN_MORPHOGENESIS	0.259099	0.123053	0.623995
GO_SIGNALING_RECEPTOR_BINDING	0.241962	0.0519084	0.62476
GO_RESPONSE_TO_PEPTIDE_HORMONE	0.349474	0.122414	0.625355
GO_CELLULAR_AMINO_ACID_METABOLIC_PROCESS	0.409618	0.0888099	0.625988
GO_NUCLEAR_BODY	0.327516	0.0411664	0.626465
GO_CELLULAR_RESPONSE_TO_DRUG	0.283994	0.136364	0.627642
GO_NEGATIVE_REGULATION_OF_PEPTIDASE_ACTIVITY	0.344728	0.136667	0.627665
GO_REGULATION_OF_CELL_PROJECTION_ORGANIZATION	0.34147	0.0775717	0.628591
GO_MUSCLE_CELL_PROLIFERATION	0.345501	0.218803	0.631527
GO_COLLAGEN_CONTAINING_EXTRACELLULAR_MATRIX	0.282723	0.191626	0.632884
GO_REGULATION_OF_ENDOTHELIAL_CELL_MIGRATION	0.407144	0.054007	0.634714
GO_WOUND_HEALING	0.274466	0.207071	0.636183
GO_ENZYME_LINKED_RECEPTOR_PROTEIN_SIGNALING_PATHWAY	0.282255	0.0316957	0.654104
GO_POSITIVE_REGULATION_OF_CELL_POPULATION_PROLIFERATION	0.216689	0.209653	0.656692
GO_NERVOUS_SYSTEM_PROCESS	0.280907	0.245315	0.6592
GO_GTPASE_BINDING	0.273784	0.20684	0.66007
GO_RESPONSE_TO_CARBOHYDRATE	0.338782	0.252189	0.661378
GO_PHOSPHOLIPID_BINDING	0.257455	0.230159	0.661954
GO_REGULATION_OF_PEPTIDASE_ACTIVITY	0.266377	0.186795	0.663369
GO_MULTICELLULAR_ORGANISMAL_HOMEOSTASIS	0.283821	0.211921	0.663416
GO_ANION_TRANSPORT	0.293529	0.234007	0.663508
GO_ENDOSOMAL_TRANSPORT	0.315572	0.215168	0.66363
GO_ADENYL_NUCLEOTIDE_BINDING	0.331022	0.0188679	0.664301
GO_RESPONSE_TO_NUTRIENT	0.336937	0.21777	0.664756
GO_CATION_TRANSMEMBRANE_TRANSPORTER_ACTIVITY	0.378299	0.051495	0.672062
GO_EXTRACELLULAR_STRUCTURE_ORGANIZATION	0.416209	0.0509666	0.673204
GO_DNA_BINDING_TRANSCRIPTION_ACTIVATOR_ACTIVITY	0.463762	0.0167785	0.674171
GO_EPITHELIAL_CELL_DIFFERENTIATION	0.353085	0.0319328	0.676523
GO_REGULATION_OF_VASCULATURE_DEVELOPMENT	0.286275	0.263736	0.689837
GO_AXON	0.380044	0.0374593	0.689929
GO_REGULATION_OF_DEVELOPMENTAL_GROWTH	0.30313	0.268781	0.690558
GO_POSITIVE_REGULATION_OF_MULTICELLULAR_ORGANISMAL_PROCESS	0.194496	0.227606	0.694109
GO_CELLULAR_RESPONSE_TO_ENDOGENOUS_STIMULUS	0.198702	0.246291	0.694362
GO_ENDOCYTOSIS	0.222458	0.241883	0.697969
GO_VACUOLAR_LUMEN	0.270865	0.250417	0.69819
GO_RECEPTOR_MEDIATED_ENDOCYTOSIS	0.262741	0.265517	0.698532
GO_PROCESS_UTILIZING_AUTOPHAGIC_MECHANISM	0.243947	0.262136	0.698746
GO_RIBONUCLEOTIDE_BINDING	0.286308	0.0179445	0.699372
GO_TRANS_GOLGI_NETWORK	0.322201	0.266898	0.699723
GO_REGULATION_OF_AUTOPHAGY	0.268614	0.267327	0.700106
GO_CANONICAL_WNT_SIGNALING_PATHWAY	0.314929	0.248227	0.701792
GO_REGULATION_OF_SYSTEM_PROCESS	0.360615	0.0568384	0.702187
GO_REGULATION_OF_DNA_TEMPLATED_TRANSCRIPTION_IN_RESPONSE_TO_STRESS	0.333118	0.285714	0.70416
GO_EXTRINSIC_APOPTOTIC_SIGNALING_PATHWAY	0.329937	0.27069	0.704472
GO_RESPONSE_TO_ENDOGENOUS_STIMULUS	0.193091	0.233945	0.707051
GO_CIRCULATORY_SYSTEM_DEVELOPMENT	0.219674	0.245455	0.709087
GO_CHROMATIN	0.347863	0.0456853	0.716754
GO_ENZYME_REGULATOR_ACTIVITY	0.202799	0.249615	0.722668
GO_RESPONSE_TO_ANTIBIOTIC	0.265406	0.273322	0.726869
GO_LATE_ENDOSOME	0.28743	0.292308	0.729674
GO_REGULATION_OF_EPITHELIAL_CELL_MIGRATION	0.397109	0.0583333	0.730078
GO_TRANSMEMBRANE_RECEPTOR_PROTEIN_TYROSINE_KINASE_SIGNALING_PATHWAY	0.313267	0.0252366	0.730494
GO_ION_TRANSPORT	0.199051	0.263704	0.731614
GO_NEGATIVE_REGULATION_OF_NUCLEOBASE_CONTAINING_COMPOUND_METABOLIC_PROCESS	0.218473	0.280864	0.733057
GO_LIPID_BINDING	0.218084	0.275651	0.733362
GO_RESPONSE_TO_ORGANIC_CYCLIC_COMPOUND	0.215669	0.267071	0.734307
GO_ORGANELLE_SUBCOMPARTMENT	0.291954	0.300341	0.735852
GO_SMALL_MOLECULE_CATABOLIC_PROCESS	0.291234	0.310051	0.737488
GO_CELL_PROJECTION_ASSEMBLY	0.26898	0.316413	0.748565
GO_TISSUE_MIGRATION	0.379009	0.0351171	0.749429
GO_CELL_GROWTH	0.281462	0.321608	0.751483
GO_OSSIFICATION	0.307027	0.313659	0.755872
GO_RUFFLE	0.308057	0.328231	0.764598
GO_LYSOSOMAL_LUMEN	0.301424	0.348958	0.764937
GO_DOUBLE_STRANDED_DNA_BINDING	0.359332	0.0402576	0.766011
GO_REGULATION_OF_NEURON_DIFFERENTIATION	0.388072	0.0232945	0.768105
GO_ZINC_ION_BINDING	0.425872	0.0271647	0.768291
GO_REGULATION_OF_RESPONSE_TO_EXTERNAL_STIMULUS	0.188397	0.323398	0.771011
GO_RESPONSE_TO_DRUG	0.201001	0.31825	0.771513
GO_CELLULAR_RESPONSE_TO_EXTRACELLULAR_STIMULUS	0.277024	0.322581	0.772185
GO_CELLULAR_RESPONSE_TO_ABIOTIC_STIMULUS	0.2834	0.335494	0.773608
GO_REGULATION_OF_BODY_FLUID_LEVELS	0.252136	0.328859	0.773954
GO_POST_TRANSLATIONAL_PROTEIN_MODIFICATION	0.397461	0.0262726	0.779035
GO_RESPONSE_TO_OXYGEN_CONTAINING_COMPOUND	0.179284	0.298817	0.780795
GO_MONOVALENT_INORGANIC_CATION_TRANSMEMBRANE_TRANSPORTER_ACTIVITY	0.290297	0.364286	0.793489
GO_REGULATORY_REGION_NUCLEIC_ACID_BINDING	0.242002	0.366776	0.796706
GO_RESPONSE_TO_REACTIVE_OXYGEN_SPECIES	0.283052	0.370642	0.797004
GO_CARBOHYDRATE_DERIVATIVE_CATABOLIC_PROCESS	0.292456	0.362069	0.797696
GO_TRANSPORTER_ACTIVITY	0.21851	0.362583	0.798184
GO_CELLULAR_RESPONSE_TO_PEPTIDE	0.247137	0.354949	0.798268
GO_REGULATION_OF_RESPONSE_TO_STRESS	0.174709	0.349085	0.799718
GO_GOLGI_APPARATUS	0.188164	0.349325	0.800003
GO_CELL_PROJECTION_MEMBRANE	0.301627	0.379371	0.800445
GO_CELLULAR_RESPONSE_TO_ORGANIC_CYCLIC_COMPOUND	0.226508	0.359455	0.800515
GO_NEGATIVE_REGULATION_OF_PROTEOLYSIS	0.249644	0.352941	0.800527
GO_CELLULAR_RESPONSE_TO_OXYGEN_LEVELS	0.265726	0.381883	0.800728
GO_REGULATION_OF_SMALL_GTPASE_MEDIATED_SIGNAL_TRANSDUCTION	0.281354	0.354237	0.801089
GO_RESPONSE_TO_STEROID_HORMONE	0.295747	0.380035	0.801167
GO_SIGNAL_TRANSDUCTION_BY_PROTEIN_PHOSPHORYLATION	0.201646	0.342146	0.802584
GO_NEGATIVE_REGULATION_OF_BIOSYNTHETIC_PROCESS	0.198113	0.367762	0.803317
GO_AGING	0.246277	0.436027	0.803778
GO_RESPONSE_TO_ACID_CHEMICAL	0.464821	0.025	0.80405
GO_ENZYME_INHIBITOR_ACTIVITY	0.252441	0.363192	0.804647
GO_REGULATION_OF_DEFENSE_RESPONSE	0.192293	0.41791	0.805014
GO_ANIMAL_ORGAN_MORPHOGENESIS	0.353296	0.0219595	0.805279
GO_NEGATIVE_REGULATION_OF_HYDROLASE_ACTIVITY	0.245723	0.354027	0.805886
GO_WHOLE_MEMBRANE	0.161793	0.391796	0.806672
GO_CELL_MORPHOGENESIS_INVOLVED_IN_NEURON_DIFFERENTIATION	0.265636	0.40708	0.80722
GO_RECYCLING_ENDOSOME	0.298864	0.416226	0.807415
GO_PHOSPHORIC_ESTER_HYDROLASE_ACTIVITY	0.288869	0.404605	0.808641
GO_REGULATION_OF_MAPK_CASCADE	0.1981	0.419558	0.808689
GO_RECEPTOR_METABOLIC_PROCESS	0.268041	0.409247	0.808967
GO_POSITIVE_REGULATION_OF_MULTI_ORGANISM_PROCESS	0.202598	0.403756	0.81009
GO_NEGATIVE_REGULATION_OF_RESPONSE_TO_EXTERNAL_STIMULUS	0.251362	0.416667	0.810092
GO_INNATE_IMMUNE_RESPONSE	0.177959	0.403535	0.810875
GO_EARLY_ENDOSOME	0.230946	0.395161	0.811248
GO_POSITIVE_REGULATION_OF_DEVELOPMENTAL_PROCESS	0.179545	0.393072	0.811811
GO_PROTEIN_DOMAIN_SPECIFIC_BINDING	0.200777	0.422556	0.812791
GO_MEMBRANE_ORGANIZATION	0.193322	0.415625	0.813133
GO_NEGATIVE_REGULATION_OF_NERVOUS_SYSTEM_DEVELOPMENT	0.2875	0.446296	0.813937
GO_ORGANIC_ACID_METABOLIC_PROCESS	0.204068	0.403537	0.814164
GO_RESPONSE_TO_ABIOTIC_STIMULUS	0.175172	0.44	0.815326
GO_NEUROGENESIS	0.186744	0.400631	0.815416
GO_ENDOPEPTIDASE_ACTIVITY	0.290605	0.435374	0.815588
GO_ENDOCYTIC_VESICLE	0.22049	0.381967	0.816422
GO_CONNECTIVE_TISSUE_DEVELOPMENT	0.4649	0.035	0.816581
GO_RAS_PROTEIN_SIGNAL_TRANSDUCTION	0.229751	0.415842	0.817818
GO_PROTEIN_FOLDING	0.27581	0.411458	0.818777
GO_REGULATION_OF_PHOSPHORUS_METABOLIC_PROCESS	0.177056	0.382916	0.819705
GO_PIGMENT_GRANULE	0.420806	0.0235294	0.821706
GO_CELLULAR_HOMEOSTASIS	0.182605	0.42921	0.822211
GO_NEGATIVE_REGULATION_OF_CELL_POPULATION_PROLIFERATION	0.216774	0.45614	0.823167
GO_CELLULAR_COMPONENT_MORPHOGENESIS	0.202361	0.446078	0.824195
GO_PEPTIDASE_ACTIVITY	0.243669	0.456667	0.833477
GO_VESICLE_LUMEN	0.21363	0.453846	0.835078
GO_NEGATIVE_REGULATION_OF_MOLECULAR_FUNCTION	0.177527	0.460245	0.83562
GO_INORGANIC_ION_TRANSMEMBRANE_TRANSPORT	0.204369	0.458787	0.835847
GO_HYDROLASE_ACTIVITY_ACTING_ON_ESTER_BONDS	0.226109	0.480127	0.835895
GO_ACTIVATION_OF_INNATE_IMMUNE_RESPONSE	0.218889	0.454237	0.838017
GO_CELL_LEADING_EDGE	0.220895	0.467846	0.83839
GO_REGULATION_OF_RESPONSE_TO_CYTOKINE_STIMULUS	0.266855	0.478799	0.83961
GO_CELLULAR_RESPONSE_TO_EXTERNAL_STIMULUS	0.227241	0.463087	0.839618
GO_MUSCLE_CELL_DIFFERENTIATION	0.269521	0.459552	0.839973
GO_NEGATIVE_REGULATION_OF_CELL_DEVELOPMENT	0.2875	0.482759	0.840773
GO_NUCLEOBASE_CONTAINING_SMALL_MOLECULE_METABOLIC_PROCESS	0.239591	0.46988	0.84086
GO_ENZYME_ACTIVATOR_ACTIVITY	0.206946	0.490939	0.841145
GO_REGULATION_OF_CELLULAR_RESPONSE_TO_STRESS	0.19717	0.474465	0.842563
GO_CELLULAR_RESPONSE_TO_OXYGEN_CONTAINING_COMPOUND	0.160023	0.522003	0.842974
GO_CELL_MORPHOGENESIS_INVOLVED_IN_DIFFERENTIATION	0.24032	0.464169	0.844419
GO_CELL_CELL_SIGNALING	0.172212	0.476263	0.844431
GO_REGULATION_OF_PHOSPHORYLATION	0.162469	0.518127	0.845213
GO_NUCLEAR_MEMBRANE	0.272934	0.495606	0.845931
GO_CELLULAR_RESPONSE_TO_CHEMICAL_STRESS	0.233808	0.498276	0.846305
GO_GLUTAMATERGIC_SYNAPSE	0.251719	0.490694	0.846613
GO_CELLULAR_RESPONSE_TO_HORMONE_STIMULUS	0.199686	0.507293	0.848379
GO_CELLULAR_RESPONSE_TO_TOXIC_SUBSTANCE	0.24003	0.500879	0.850267
GO_REGULATION_OF_TRANSPORTER_ACTIVITY	0.25867	0.509091	0.851864
GO_DEFENSE_RESPONSE_TO_OTHER_ORGANISM	0.159629	0.509317	0.853203
GO_REGULATION_OF_WNT_SIGNALING_PATHWAY	0.243546	0.517606	0.853418
GO_PROTEOLYSIS	0.157382	0.546547	0.854743
GO_REGULATION_OF_CELL_DIFFERENTIATION	0.15853	0.520896	0.854766
GO_IDENTICAL_PROTEIN_BINDING	0.158617	0.552194	0.855792
GO_MEMBRANE_REGION	0.213311	0.520067	0.856737
GO_ACTIN_FILAMENT_ORGANIZATION	0.215496	0.494488	0.856914
GO_NEGATIVE_REGULATION_OF_CYTOKINE_PRODUCTION	0.229124	0.512605	0.857041
GO_PEPTIDYL_SERINE_MODIFICATION	0.241329	0.562607	0.858362
GO_MICROTUBULE_ORGANIZING_CENTER	0.246945	0.527731	0.859301
GO_NEGATIVE_REGULATION_OF_CELLULAR_CATABOLIC_PROCESS	0.227898	0.539474	0.86153
GO_COFACTOR_METABOLIC_PROCESS	0.235148	0.538071	0.861648
GO_REGULATION_OF_CYTOSKELETON_ORGANIZATION	0.204918	0.539898	0.862429
GO_SECRETION	0.147642	0.580265	0.862461
GO_NEGATIVE_REGULATION_OF_CATALYTIC_ACTIVITY	0.181115	0.5568	0.863724
GO_ACTIN_FILAMENT_BASED_PROCESS	0.192185	0.58132	0.865379
GO_NUCLEAR_SPECK	0.430303	0.0315236	0.865412
GO_CELL_CYCLE_PROCESS	0.174182	0.575617	0.865863
GO_CELL_CELL_SIGNALING_BY_WNT	0.203875	0.55298	0.868441
GO_REGULATION_OF_PROTEOLYSIS	0.173861	0.559375	0.869182
GO_CELL_SURFACE_RECEPTOR_SIGNALING_PATHWAY_INVOLVED_IN_CELL_CELL_SIGNALING	0.203875	0.578431	0.878402
GO_REGULATION_OF_CELLULAR_COMPONENT_SIZE	0.201503	0.602389	0.878562
GO_POSITIVE_REGULATION_OF_RESPONSE_TO_BIOTIC_STIMULUS	0.190075	0.562197	0.87906
GO_ORGANOPHOSPHATE_METABOLIC_PROCESS	0.181297	0.656863	0.879255
GO_ACTIN_BINDING	0.211924	0.590982	0.879797
GO_CENTROSOME	0.249474	0.577441	0.879932
GO_INTRINSIC_APOPTOTIC_SIGNALING_PATHWAY	0.21549	0.576271	0.880049
GO_PRESYNAPSE	0.231721	0.636201	0.880497
GO_KINASE_ACTIVITY	0.199505	0.582492	0.880575
GO_POSITIVE_REGULATION_OF_CELLULAR_COMPONENT_ORGANIZATION	0.150558	0.665165	0.882072
GO_NUCLEAR_TRANSPORT	0.22608	0.618729	0.882323
GO_REGULATION_OF_ANATOMICAL_STRUCTURE_MORPHOGENESIS	0.154586	0.677177	0.882576
GO_RESPONSE_TO_OXIDATIVE_STRESS	0.199333	0.577889	0.882649
GO_RESPONSE_TO_GROWTH_FACTOR	0.17662	0.662885	0.88297
GO_OUTER_MEMBRANE	0.245279	0.554745	0.88304
GO_CELL_PART_MORPHOGENESIS	0.199253	0.643192	0.884039
GO_PATTERN_RECOGNITION_RECEPTOR_SIGNALING_PATHWAY	0.246817	0.575	0.885215
GO_EMBRYO_DEVELOPMENT_ENDING_IN_BIRTH_OR_EGG_HATCHING	0.207959	0.615905	0.88574
GO_REPRODUCTION	0.178499	0.602219	0.88618
GO_CELL_CORTEX	0.236034	0.625216	0.88695
GO_PROTEIN_HOMODIMERIZATION_ACTIVITY	0.184693	0.607535	0.887788
GO_TRANSFERASE_COMPLEX	0.196729	0.627986	0.888586
GO_RESPONSE_TO_STARVATION	0.247762	0.583184	0.888751
GO_DIVALENT_INORGANIC_CATION_TRANSPORT	0.229559	0.576792	0.88944
GO_POSITIVE_REGULATION_OF_TRANSCRIPTION_BY_RNA_POLYMERASE_II	0.173398	0.63233	0.889833
GO_CELLULAR_COMPONENT_DISASSEMBLY	0.192493	0.598604	0.890275
GO_POSITIVE_REGULATION_OF_HYDROLASE_ACTIVITY	0.174162	0.619497	0.890461
GO_POSITIVE_REGULATION_OF_RNA_METABOLIC_PROCESS	0.144193	0.737879	0.890685
GO_PROTEIN_DEPHOSPHORYLATION	0.235908	0.617958	0.891084
GO_MACROAUTOPHAGY	0.218816	0.633779	0.892006
GO_POSITIVE_REGULATION_OF_SECRETION	0.166725	0.7056	0.892111
GO_PROTEIN_CATABOLIC_PROCESS	0.156147	0.653495	0.89214
GO_ANTIGEN_PROCESSING_AND_PRESENTATION_OF_PEPTIDE_ANTIGEN	0.186145	0.685714	0.892513
GO_ANTIGEN_PROCESSING_AND_PRESENTATION	0.178226	0.673841	0.89286
GO_REGULATION_OF_SUPRAMOLECULAR_FIBER_ORGANIZATION	0.185831	0.683135	0.892893
GO_REGULATION_OF_HORMONE_LEVELS	0.202583	0.658537	0.892959
GO_ION_TRANSMEMBRANE_TRANSPORT	0.155986	0.721109	0.893003
GO_DEPHOSPHORYLATION	0.206275	0.595563	0.893049
GO_ENDOPLASMIC_RETICULUM	0.146418	0.667164	0.893173
GO_CARBOHYDRATE_DERIVATIVE_METABOLIC_PROCESS	0.175301	0.627543	0.894612
GO_LIPID_METABOLIC_PROCESS	0.161185	0.707317	0.894742
GO_EXOCYTOSIS	0.147624	0.662669	0.89476
GO_REGULATION_OF_ACTIN_FILAMENT_ORGANIZATION	0.196291	0.671329	0.894798
GO_NEGATIVE_REGULATION_OF_PROTEIN_METABOLIC_PROCESS	0.139613	0.75976	0.894885
GO_PROTEIN_LOCALIZATION_TO_PLASMA_MEMBRANE	0.200196	0.693603	0.895239
GO_GLYCOPROTEIN_METABOLIC_PROCESS	0.210294	0.69913	0.896296
GO_ORGANIC_HYDROXY_COMPOUND_METABOLIC_PROCESS	0.209841	0.699115	0.896527
GO_HEART_DEVELOPMENT	0.200716	0.603252	0.897091
GO_PROTEIN_PHOSPHORYLATION	0.146318	0.653846	0.897465
GO_CELLULAR_PROTEIN_CATABOLIC_PROCESS	0.158332	0.689759	0.897791
GO_REGULATION_OF_PROTEIN_MODIFICATION_PROCESS	0.143075	0.640625	0.897917
GO_NUCLEAR_OUTER_MEMBRANE_ENDOPLASMIC_RETICULUM_MEMBRANE_NETWORK	0.154398	0.714992	0.898116
GO_VACUOLE	0.154507	0.671949	0.898941
GO_CARBOHYDRATE_DERIVATIVE_BIOSYNTHETIC_PROCESS	0.193898	0.713299	0.899008
GO_POSITIVE_REGULATION_OF_PROTEIN_METABOLIC_PROCESS	0.135985	0.708271	0.899039
GO_UBIQUITIN_LIKE_PROTEIN_LIGASE_BINDING	0.19593	0.668954	0.899992
GO_SECRETORY_VESICLE	0.141647	0.791277	0.900215
GO_IN_UTERO_EMBRYONIC_DEVELOPMENT	0.229056	0.648148	0.900321
GO_GOLGI_MEMBRANE	0.168641	0.730645	0.900393
GO_ACTIVATION_OF_IMMUNE_RESPONSE	0.156553	0.72457	0.90056
GO_TRANSCRIPTION_FACTOR_BINDING	0.195376	0.661667	0.900936
GO_SMALL_MOLECULE_BIOSYNTHETIC_PROCESS	0.172216	0.697987	0.901944
GO_APICAL_PART_OF_CELL	0.222055	0.66725	0.902225
GO_PHAGOCYTIC_VESICLE	0.195815	0.734134	0.902491
GO_POSITIVE_REGULATION_OF_CYTOSKELETON_ORGANIZATION	0.211137	0.701724	0.902877
GO_CELLULAR_RESPONSE_TO_DNA_DAMAGE_STIMULUS	0.172131	0.747423	0.903017
GO_VACUOLAR_MEMBRANE	0.168175	0.700965	0.903511
GO_REGULATION_OF_CELL_CYCLE_PROCESS	0.166121	0.74183	0.903923
GO_SECRETORY_GRANULE	0.144407	0.715373	0.904684
GO_PROTEIN_LOCALIZATION_TO_CELL_PERIPHERY	0.200196	0.678201	0.907226
GO_REGULATION_OF_CELL_CYCLE	0.146879	0.782609	0.909419
GO_FICOLIN_1_RICH_GRANULE	0.194895	0.714041	0.909596
GO_MITOTIC_CELL_CYCLE	0.153636	0.780031	0.910668
GO_POSITIVE_REGULATION_OF_CELLULAR_COMPONENT_BIOGENESIS	0.173476	0.707904	0.910742
GO_NEGATIVE_REGULATION_OF_CATABOLIC_PROCESS	0.183559	0.768595	0.912249
GO_PROTEIN_KINASE_ACTIVITY	0.180258	0.758148	0.916959
GO_MODIFICATION_DEPENDENT_MACROMOLECULE_CATABOLIC_PROCESS	0.163538	0.77551	0.917031
GO_ORGANELLE_FISSION	0.208496	0.769882	0.917847
GO_COAGULATION	0.192761	0.779896	0.918394
GO_OXIDOREDUCTASE_ACTIVITY	0.156075	0.77116	0.919504
GO_MULTICELLULAR_ORGANISM_REPRODUCTION	0.173772	0.766212	0.920626
GO_REGULATION_OF_RESPONSE_TO_BIOTIC_STIMULUS	0.145971	0.84252	0.922097
GO_TRANSFERASE_ACTIVITY_TRANSFERRING_PHOSPHORUS_CONTAINING_GROUPS	0.156605	0.790698	0.922674
GO_ANTIGEN_PROCESSING_AND_PRESENTATION_OF_PEPTIDE_ANTIGEN_VIA_MHC_CLASS_I	0.207127	0.778912	0.922682
GO_CELLULAR_RESPONSE_TO_PEPTIDE_HORMONE_STIMULUS	0.197648	0.776817	0.924544
GO_CELL_CYCLE_G2_M_PHASE_TRANSITION	0.218331	0.766849	0.92469
GO_NUCLEAR_ENVELOPE	0.171858	0.795041	0.925015
GO_NEGATIVE_REGULATION_OF_SIGNALING	0.127927	0.853474	0.925109
GO_ORGANELLE_LOCALIZATION	0.173899	0.77451	0.925747
GO_NEGATIVE_REGULATION_OF_CELL_CYCLE	0.166566	0.787829	0.926136
GO_CELL_CYCLE	0.132236	0.847458	0.927566
GO_PROTEIN_COMPLEX_OLIGOMERIZATION	0.161056	0.806338	0.930584
GO_REGULATION_OF_CELLULAR_RESPONSE_TO_GROWTH_FACTOR_STIMULUS	0.206779	0.796167	0.93174
GO_MICROTUBULE_BASED_PROCESS	0.189941	0.810714	0.932319
GO_DNA_METABOLIC_PROCESS	0.164994	0.813758	0.932755
GO_POSITIVE_REGULATION_OF_NUCLEOBASE_CONTAINING_COMPOUND_METABOLIC_PROCESS	0.123778	0.862629	0.935867
GO_SUPRAMOLECULAR_POLYMER	0.161423	0.828333	0.938894
GO_ESTABLISHMENT_OF_ORGANELLE_LOCALIZATION	0.182437	0.839669	0.93905
GO_DEFENSE_RESPONSE_TO_VIRUS	0.180273	0.829825	0.94007
GO_REPRODUCTIVE_SYSTEM_DEVELOPMENT	0.178065	0.828473	0.940118
GO_IMMUNE_RESPONSE_REGULATING_SIGNALING_PATHWAY	0.139249	0.819237	0.940145
GO_REGULATION_OF_CELLULAR_LOCALIZATION	0.137575	0.887122	0.940317
GO_ORGANOPHOSPHATE_BIOSYNTHETIC_PROCESS	0.179735	0.848185	0.940855
GO_PROTEIN_POLYUBIQUITINATION	0.177855	0.83277	0.941451
GO_COFACTOR_BINDING	0.188668	0.819643	0.941864
GO_MONOVALENT_INORGANIC_CATION_TRANSPORT	0.151915	0.84975	0.94277
GO_REGULATION_OF_MRNA_METABOLIC_PROCESS	0.161909	0.836667	0.943152
GO_TRANSPORT_VESICLE	0.187286	0.853147	0.943261
GO_ENDOCYTIC_VESICLE_MEMBRANE	0.16005	0.849758	0.94523
GO_SEXUAL_REPRODUCTION	0.166713	0.903743	0.947228
GO_LIPID_LOCALIZATION	0.16995	0.861338	0.947379
GO_TOLL_LIKE_RECEPTOR_SIGNALING_PATHWAY	0.189891	0.866328	0.947794
GO_REGULATION_OF_CYSTEINE_TYPE_ENDOPEPTIDASE_ACTIVITY	0.172003	0.851667	0.951267
GO_MICROTUBULE_CYTOSKELETON	0.139946	0.904605	0.962287
GO_NUCLEOSIDE_TRIPHOSPHATASE_REGULATOR_ACTIVITY	0.17428	0.889273	0.962463
GO_REGULATION_OF_CELL_CYCLE_PHASE_TRANSITION	0.153774	0.893864	0.963615
GO_REGULATION_OF_ACTIN_FILAMENT_BASED_PROCESS	0.143897	0.901213	0.964519
GO_POSITIVE_REGULATION_OF_PROTEOLYSIS	0.14843	0.898858	0.964532
GO_AZUROPHIL_GRANULE	0.1563	0.888112	0.966434
GO_RNA_SPLICING	0.153533	0.895254	0.966722
GO_SULFUR_COMPOUND_METABOLIC_PROCESS	0.166623	0.890071	0.969222
GO_MULTI_ORGANISM_REPRODUCTIVE_PROCESS	0.131476	0.916393	0.970259
GO_REGULATION_OF_ORGANELLE_ORGANIZATION	0.10848	0.948328	0.970968
GO_CARBOHYDRATE_METABOLIC_PROCESS	0.141361	0.925373	0.971415
GO_REGULATION_OF_MRNA_CATABOLIC_PROCESS	0.158687	0.928455	0.972052
GO_PROTEIN_MODIFICATION_BY_SMALL_PROTEIN_CONJUGATION_OR_REMOVAL	0.120344	0.92891	0.972579
GO_DNA_REPAIR	0.149043	0.946714	0.98004
GO_PROTEIN_MODIFICATION_BY_SMALL_PROTEIN_CONJUGATION	0.118884	0.94108	0.980362
GO_MITOCHONDRIAL_ENVELOPE	0.108757	0.9375	0.982089
GO_NEGATIVE_REGULATION_OF_CELL_CYCLE_PROCESS	0.148331	0.936594	0.982563
GO_GUANYL_NUCLEOTIDE_BINDING	0.118481	0.98527	0.985213
GO_NEGATIVE_REGULATION_OF_PHOSPHORUS_METABOLIC_PROCESS	0.108667	0.970968	0.986043
GO_PROTEIN_HOMOOLIGOMERIZATION	0.132984	0.951424	0.986209
GO_CELLULAR_RESPONSE_TO_INORGANIC_SUBSTANCE	0.133232	0.966605	0.987634
GO_POLYMERIC_CYTOSKELETAL_FIBER	0.112404	0.984563	0.988813
GO_NEGATIVE_REGULATION_OF_PHOSPHORYLATION	0.117857	0.972509	0.990061
GO_PROTEIN_MODIFICATION_BY_SMALL_PROTEIN_REMOVAL	0.143589	0.964851	0.990833
GO_PROTEASOMAL_PROTEIN_CATABOLIC_PROCESS	0.108449	0.983333	0.991096
GO_RESPONSE_TO_METAL_ION	0.117629	0.978261	0.993056
GO_HYDROLASE_ACTIVITY_ACTING_ON_ACID_ANHYDRIDES	0.0820455	0.998302	0.996757
GO UP in C6	ES	NOM p-val	FDR q-val
GO_VIRAL_GENE_EXPRESSION	-0.630395	0	0
GO_NUCLEAR_TRANSCRIBED_MRNA_CATABOLIC_PROCESS_NONSENSE_MEDIATED_DECAY	-0.639308	0	0
GO_COTRANSLATIONAL_PROTEIN_TARGETING_TO_MEMBRANE	-0.638293	0	0
GO_ESTABLISHMENT_OF_PROTEIN_LOCALIZATION_TO_ENDOPLASMIC_RETICULUM	-0.615741	0	0
GO_CYTOSOLIC_RIBOSOME	-0.638718	0	0
GO_NUCLEAR_TRANSCRIBED_MRNA_CATABOLIC_PROCESS	-0.620416	0	0
GO_PROTEIN_TARGETING_TO_MEMBRANE	-0.604635	0	0
GO_RIBOSOMAL_SUBUNIT	-0.590767	0	0
GO_PROTEIN_LOCALIZATION_TO_ENDOPLASMIC_RETICULUM	-0.602298	0	0
GO_TRANSLATIONAL_INITIATION	-0.55841	0	0
GO_STRUCTURAL_CONSTITUENT_OF_RIBOSOME	-0.590767	0	0
GO_RIBOSOME	-0.572071	0	0
GO_PROTEIN_TARGETING	-0.557258	0	0
GO_RNA_CATABOLIC_PROCESS	-0.513765	0	0
GO_CYTOSOLIC_LARGE_RIBOSOMAL_SUBUNIT	-0.643547	0	0
GO_ESTABLISHMENT_OF_PROTEIN_LOCALIZATION_TO_MEMBRANE	-0.5151	0	0
GO_ESTABLISHMENT_OF_PROTEIN_LOCALIZATION_TO_ORGANELLE	-0.503441	0	0
GO_RIBONUCLEOPROTEIN_COMPLEX	-0.495716	0	0
GO_STRUCTURAL_MOLECULE_ACTIVITY	-0.474454	0	0
GO_LARGE_RIBOSOMAL_SUBUNIT	-0.584592	0	0
GO_INTERSPECIES_INTERACTION_BETWEEN_ORGANISMS	-0.419841	0	0
GO_PEPTIDE_BIOSYNTHETIC_PROCESS	-0.447533	0	0
GO_PROTEIN_LOCALIZATION_TO_ORGANELLE	-0.422546	0	0
GO_PROTEIN_LOCALIZATION_TO_MEMBRANE	-0.429648	0	0
GO_CELLULAR_NITROGEN_COMPOUND_CATABOLIC_PROCESS	-0.438939	0	0
GO_ORGANIC_CYCLIC_COMPOUND_CATABOLIC_PROCESS	-0.436968	0	0
GO_PEPTIDE_METABOLIC_PROCESS	-0.418007	0	0
GO_MRNA_METABOLIC_PROCESS	-0.415878	0	0
GO_AMIDE_BIOSYNTHETIC_PROCESS	-0.412455	0	0
GO_POLYSOME	-0.602438	0	0
GO_CYTOPLASMIC_TRANSLATION	-0.513063	0	0.000204743
GO_REGULATION_OF_LYMPHOCYTE_ACTIVATION	-0.474208	0	0.000221787
GO_CYTOSOLIC_SMALL_RIBOSOMAL_SUBUNIT	-0.581635	0	0.000228508
GO_MYELOID_LEUKOCYTE_MIGRATION	-0.547596	0	0.000235649
GO_RIBOSOMAL_LARGE_SUBUNIT_BIOGENESIS	-0.636372	0	0.000321401
GO_CELLULAR_AMIDE_METABOLIC_PROCESS	-0.346862	0	0.000346159
GO_POSITIVE_REGULATION_OF_LEUKOCYTE_PROLIFERATION	-0.575238	0	0.000449246
GO_CELL_CHEMOTAXIS	-0.464188	0	0.000461069
GO_RIBOSOME_BIOGENESIS	-0.491097	0	0.00047353
GO_POLYSOMAL_RIBOSOME	-0.575372	0	0.000518388
GO_INTRACELLULAR_PROTEIN_TRANSPORT	-0.348525	0	0.000531348
GO_SMALL_RIBOSOMAL_SUBUNIT	-0.535579	0	0.000536063
GO_POSITIVE_REGULATION_OF_LEUKOCYTE_CHEMOTAXIS	-0.564509	0	0.00105934
GO_REGULATION_OF_CELL_ACTIVATION	-0.411169	0	0.00117981
GO_CELLULAR_MACROMOLECULE_CATABOLIC_PROCESS	-0.331503	0	0.00126782
GO_REGULATION_OF_T_CELL_ACTIVATION	-0.469378	0	0.00185936
GO_LEUKOCYTE_CHEMOTAXIS	-0.462827	0	0.0018729
GO_LEUKOCYTE_PROLIFERATION	-0.463695	0	0.00189978
GO_REGULATION_OF_LEUKOCYTE_CHEMOTAXIS	-0.502065	0	0.00190891
GO_CELLULAR_MACROMOLECULE_LOCALIZATION	-0.29971	0	0.00197081
GO_CELL_SUBSTRATE_JUNCTION	-0.362678	0	0.00218487
GO_POSITIVE_REGULATION_OF_CELL_ACTIVATION	-0.450742	0	0.00222771
GO_RIBONUCLEOPROTEIN_COMPLEX_BIOGENESIS	-0.428283	0	0.00223643
GO_REGULATION_OF_LEUKOCYTE_PROLIFERATION	-0.476548	0	0.00252563
GO_MACROMOLECULE_CATABOLIC_PROCESS	-0.297635	0	0.00284481
GO_RIBONUCLEOPROTEIN_COMPLEX_SUBUNIT_ORGANIZATION	-0.516625	0	0.00290566
GO_CYTOKINE_RECEPTOR_BINDING	-0.511582	0	0.00329668
GO_LYMPHOCYTE_ACTIVATION	-0.367165	0	0.00331413
GO_POSITIVE_REGULATION_OF_T_CELL_PROLIFERATION	-0.572568	0.0045977	0.00332714
GO_POSITIVE_REGULATION_OF_CHEMOTAXIS	-0.507761	0	0.00395437
GO_REGULATION_OF_SYMBIOSIS_ENCOMPASSING_MUTUALISM_THROUGH_PARASITISM	-0.503364	0	0.0040925
GO_POSITIVE_REGULATION_OF_LEUKOCYTE_MIGRATION	-0.482762	0	0.00414404
GO_TAXIS	-0.370841	0	0.0041704
GO_ORGANONITROGEN_COMPOUND_BIOSYNTHETIC_PROCESS	-0.285247	0	0.00547438
GO_T_CELL_ACTIVATION	-0.404716	0	0.00582508
GO_POSITIVE_REGULATION_OF_CELL_CELL_ADHESION	-0.490006	0	0.00586925
GO_POSITIVE_REGULATION_OF_LEUKOCYTE_CELL_CELL_ADHESION	-0.510287	0.00238095	0.00591334
GO_REGULATION_OF_LEUKOCYTE_DIFFERENTIATION	-0.423049	0	0.00692093
GO_RNA_BINDING	-0.285084	0	0.00712987
GO_REGULATION_OF_LEUKOCYTE_MIGRATION	-0.438094	0.0101523	0.00816112
GO_GLIOGENESIS	-0.512813	0.00240385	0.00913589
GO_SECOND_MESSENGER_MEDIATED_SIGNALING	-0.454161	0.00483092	0.0095135
GO_LEUKOCYTE_MIGRATION	-0.358002	0	0.00982621
GO_POSITIVE_REGULATION_OF_ION_TRANSPORT	-0.437813	0.00480769	0.013692
GO_NEGATIVE_REGULATION_OF_IMMUNE_SYSTEM_PROCESS	-0.376289	0.00767263	0.0137259
GO_RRNA_METABOLIC_PROCESS	-0.461914	0.00485437	0.013913
GO_TUMOR_NECROSIS_FACTOR_SUPERFAMILY_CYTOKINE_PRODUCTION	-0.468067	0.00251889	0.0140285
GO_CELL_CELL_ADHESION	-0.340601	0.00265957	0.0167459
GO_LYMPHOCYTE_MEDIATED_IMMUNITY	-0.456947	0.00665188	0.017864
GO_POSITIVE_REGULATION_OF_TUMOR_NECROSIS_FACTOR_SUPERFAMILY_CYTOKINE_PRODUCTION	-0.501485	0.0161663	0.0185352
GO_REGULATION_OF_CHEMOTAXIS	-0.405236	0	0.0188327
GO_INTRACELLULAR_TRANSPORT	-0.264298	0	0.0189241
GO_NCRNA_METABOLIC_PROCESS	-0.437586	0.00771208	0.0190485
GO_T_CELL_PROLIFERATION	-0.421932	0.0075188	0.0191179
GO_LEUKOCYTE_CELL_CELL_ADHESION	-0.381577	0.00515464	0.0193037
GO_NEGATIVE_REGULATION_OF_CELL_ACTIVATION	-0.436966	0.00238095	0.0194477
GO_ADAPTIVE_IMMUNE_RESPONSE_BASED_ON_SOMATIC_RECOMBINATION_OF_IMMUNE_RECEPTORS_BUILT_FROM_IMMUNOGLOBULIN_SUPERFAMILY_DOMAINS	-0.471916	0.00950119	0.0271269
GO_POSITIVE_REGULATION_OF_CELL_ADHESION	-0.409396	0.00738916	0.029564
GO_NCRNA_PROCESSING	-0.437586	0.00970874	0.0316804
GO_G_PROTEIN_COUPLED_RECEPTOR_SIGNALING_PATHWAY	-0.337689	0.00249377	0.0324975
GO_POSITIVE_REGULATION_OF_LOCOMOTION	-0.32485	0.00804289	0.0326782
GO_EXTERNAL_SIDE_OF_PLASMA_MEMBRANE	-0.443993	0.0120773	0.0328198
GO_POSITIVE_REGULATION_OF_INFLAMMATORY_RESPONSE	-0.456421	0.0165877	0.0336348
GO_ANCHORING_JUNCTION	-0.281777	0	0.0337147
GO_REGULATION_OF_CELL_CELL_ADHESION	-0.352612	0.00731707	0.0342717
GO_NEGATIVE_REGULATION_OF_LYMPHOCYTE_ACTIVATION	-0.461482	0.00691244	0.0346098
GO_HUMORAL_IMMUNE_RESPONSE	-0.423856	0.0198676	0.0394371
GO_REGULATION_OF_PEPTIDE_SECRETION	-0.330099	0.0127226	0.0395756
GO_B_CELL_ACTIVATION	-0.410586	0.018648	0.0397932
GO_CYTOKINE_ACTIVITY	-0.455897	0.0192308	0.0423446
GO_INFLAMMATORY_RESPONSE	-0.287453	0	0.0474934
GO_LEUKOCYTE_DIFFERENTIATION	-0.306873	0.0114286	0.0475169
GO_MONONUCLEAR_CELL_MIGRATION	-0.458154	0.0214286	0.0512931
GO_REGULATION_OF_INFLAMMATORY_RESPONSE	-0.36302	0.0246305	0.0530662
GO_POSITIVE_REGULATION_OF_CELL_DEVELOPMENT	-0.371546	0.020202	0.0541257
GO_HOMEOSTASIS_OF_NUMBER_OF_CELLS	-0.358766	0.0208877	0.0543144
GO_REGULATION_OF_HEMOPOIESIS	-0.33535	0.02	0.0544898
GO_CYTOPLASMIC_SIDE_OF_MEMBRANE	-0.438005	0.022779	0.0554666
GO_REGULATION_OF_IMMUNE_SYSTEM_PROCESS	-0.235376	0.0137457	0.0559101
GO_SIDE_OF_MEMBRANE	-0.332014	0.0197183	0.0561531
GO_PRODUCTION_OF_MOLECULAR_MEDIATOR_OF_IMMUNE_RESPONSE	-0.411472	0.0222772	0.059196
GO_G_PROTEIN_COUPLED_RECEPTOR_BINDING	-0.397954	0.0283019	0.0611431
GO_CELL_JUNCTION	-0.256012	0	0.0618842
GO_NEGATIVE_REGULATION_OF_APOPTOTIC_SIGNALING_PATHWAY	-0.443344	0.0272109	0.0634961
GO_POSITIVE_REGULATION_OF_CYTOKINE_PRODUCTION	-0.316025	0.0225	0.0653371
GO_CELL_BODY	-0.363283	0.0183727	0.0688881
GO_REGULATION_OF_TRANS_SYNAPTIC_SIGNALING	-0.402809	0.0310263	0.0693473
GO_NEGATIVE_REGULATION_OF_SECRETION	-0.429664	0.0488372	0.0707744
GO_REGULATION_OF_INTRINSIC_APOPTOTIC_SIGNALING_PATHWAY	-0.419238	0.0387409	0.0735164
GO_REGULATION_OF_ION_TRANSPORT	-0.317218	0.0284238	0.0742243
GO_REGULATION_OF_APOPTOTIC_SIGNALING_PATHWAY	-0.326618	0.00791557	0.0742911
GO_CELL_ACTIVATION	-0.231345	0.00643087	0.0750543
GO_REGULATION_OF_CYTOSOLIC_CALCIUM_ION_CONCENTRATION	-0.416368	0.0232558	0.0765888
GO_ADAPTIVE_IMMUNE_RESPONSE	-0.348204	0.0409207	0.0798133
GO_MYELOID_LEUKOCYTE_DIFFERENTIATION	-0.3578	0.0241546	0.0800308
GO_POSITIVE_REGULATION_OF_IMMUNE_EFFECTOR_PROCESS	-0.353034	0.040201	0.0871276
GO_POSITIVE_REGULATION_OF_I_KAPPAB_KINASE_NF_KAPPAB_SIGNALING	-0.41171	0.0344828	0.0898349
GO_REGULATION_OF_REACTIVE_OXYGEN_SPECIES_METABOLIC_PROCESS	-0.395343	0.0429594	0.0904474
GO_CYTOKINE_MEDIATED_SIGNALING_PATHWAY	-0.247572	0.0181818	0.0908913
GO_MYELOID_CELL_HOMEOSTASIS	-0.377767	0.0357143	0.0910319
GO_NEURON_TO_NEURON_SYNAPSE	-0.334905	0.0313316	0.0981657
GO_CYTOKINE_PRODUCTION	-0.260042	0.0252101	0.0995947
GO_REGULATION_OF_LIPID_METABOLIC_PROCESS	-0.405196	0.0378251	0.100731
GO_BIOLOGICAL_ADHESION	-0.251553	0.0146199	0.101059
GO_POSITIVE_REGULATION_OF_IMMUNE_SYSTEM_PROCESS	-0.235577	0.0154799	0.102343
GO_PEPTIDE_SECRETION	-0.28078	0.0316623	0.102649
GO_REGULATION_OF_PROTEIN_STABILITY	-0.376047	0.0608899	0.107176
GO_POSITIVE_REGULATION_OF_LEUKOCYTE_DIFFERENTIATION	-0.398818	0.0471698	0.112081
GO_LYMPHOCYTE_DIFFERENTIATION	-0.315433	0.0463918	0.112358
GO_POSITIVE_REGULATION_OF_NERVOUS_SYSTEM_DEVELOPMENT	-0.354144	0.0418605	0.112877
GO_PROTEIN_KINASE_B_SIGNALING	-0.389496	0.0543735	0.118498
GO_NEGATIVE_REGULATION_OF_DEVELOPMENTAL_PROCESS	-0.260224	0.0220386	0.11914
GO_NEURON_APOPTOTIC_PROCESS	-0.379322	0.0626506	0.122869
GO_REGULATION_OF_SECRETION	-0.255084	0.0326087	0.123326
GO_DIVALENT_INORGANIC_CATION_HOMEOSTASIS	-0.315101	0.053012	0.125228
GO_REGULATION_OF_VIRAL_LIFE_CYCLE	-0.39816	0.0711009	0.127719
GO_NEURON_DEATH	-0.327798	0.0476191	0.129646
GO_CELL_MOTILITY	-0.22278	0.0319489	0.131706
GO_CYTOKINE_SECRETION	-0.345921	0.0560748	0.131756
GO_T_CELL_DIFFERENTIATION	-0.369962	0.0613208	0.136211
GO_REGULATION_OF_CELLULAR_COMPONENT_MOVEMENT	-0.235036	0.0195531	0.137502
GO_SYNAPSE	-0.233269	0.0508982	0.138074
GO_REGULATION_OF_LEUKOCYTE_MEDIATED_IMMUNITY	-0.373646	0.0752427	0.140622
GO_CELLULAR_RESPONSE_TO_BIOTIC_STIMULUS	-0.317227	0.0601504	0.143402
GO_NUCLEOLUS	-0.248844	0.0404313	0.143672
GO_I_KAPPAB_KINASE_NF_KAPPAB_SIGNALING	-0.342123	0.0635697	0.145299
GO_LOCOMOTION	-0.216524	0.0166113	0.152087
GO_INTERLEUKIN_6_PRODUCTION	-0.3505	0.089372	0.154041
GO_RESPONSE_TO_CYTOKINE	-0.209122	0.0351906	0.158599
GO_RESPONSE_TO_BACTERIUM	-0.257026	0.0418994	0.162541
GO_RECEPTOR_REGULATOR_ACTIVITY	-0.338368	0.0788177	0.162684
GO_POSITIVE_REGULATION_OF_APOPTOTIC_SIGNALING_PATHWAY	-0.350912	0.11435	0.172145
GO_MYELOID_CELL_DIFFERENTIATION	-0.284619	0.0871795	0.172515
GO_DEFENSE_RESPONSE	-0.201928	0.0238908	0.173148
GO_CELLULAR_PROTEIN_CONTAINING_COMPLEX_ASSEMBLY	-0.23192	0.0661376	0.173246
GO_POSITIVE_REGULATION_OF_HEMOPOIESIS	-0.358243	0.0960187	0.173762
GO_PHAGOCYTOSIS	-0.294359	0.0970874	0.181442
GO_REGULATION_OF_PROTEIN_LOCALIZATION	-0.238658	0.0609418	0.183409
GO_POSITIVE_REGULATION_OF_CELL_DIFFERENTIATION	-0.246917	0.0580111	0.184314
GO_NEGATIVE_REGULATION_OF_CELL_DIFFERENTIATION	-0.268852	0.0871935	0.184359
GO_SYNAPTIC_SIGNALING	-0.295504	0.0927318	0.186317
GO_LEUKOCYTE_MEDIATED_IMMUNITY	-0.221059	0.054878	0.186424
GO_RESPONSE_TO_TUMOR_NECROSIS_FACTOR	-0.322228	0.0920097	0.187354
GO_POSITIVE_REGULATION_OF_MAP_KINASE_ACTIVITY	-0.353468	0.0933333	0.192342
GO_NEGATIVE_REGULATION_OF_MULTICELLULAR_ORGANISMAL_PROCESS	-0.21956	0.0544959	0.192832
GO_RESPONSE_TO_INTERFERON_GAMMA	-0.294614	0.0952381	0.193032
GO_POSTSYNAPSE	-0.261592	0.0874317	0.196562
GO_POSITIVE_REGULATION_OF_RESPONSE_TO_EXTERNAL_STIMULUS	-0.230662	0.0708447	0.196997
GO_CELL_SURFACE	-0.243044	0.0795455	0.199554
GO_POSITIVE_REGULATION_OF_ERK1_AND_ERK2_CASCADE	-0.30721	0.0890585	0.200114
GO_REACTIVE_OXYGEN_SPECIES_METABOLIC_PROCESS	-0.293613	0.108696	0.201683
GO_REGULATION_OF_MYELOID_CELL_DIFFERENTIATION	-0.335938	0.122402	0.215311
GO_NEGATIVE_REGULATION_OF_TRANSPORT	-0.28458	0.0968586	0.218082
GO_RESPONSE_TO_MOLECULE_OF_BACTERIAL_ORIGIN	-0.27313	0.0942928	0.22641
GO_METAL_ION_HOMEOSTASIS	-0.243483	0.105572	0.231152
GO_INTERACTION_WITH_HOST	-0.302301	0.12439	0.231276
GO_POSITIVE_REGULATION_OF_PROTEIN_SERINE_THREONINE_KINASE_ACTIVITY	-0.331005	0.123288	0.231972
GO_POSITIVE_REGULATION_OF_INTRACELLULAR_SIGNAL_TRANSDUCTION	-0.209382	0.0984615	0.233052
GO_SIGNAL_TRANSDUCTION_BY_P53_CLASS_MEDIATOR	-0.346015	0.147126	0.23346
GO_IMMUNE_SYSTEM_DEVELOPMENT	-0.214369	0.0870786	0.235024
GO_POSITIVE_REGULATION_OF_PEPTIDE_SECRETION	-0.286722	0.146835	0.23713
GO_APOPTOTIC_SIGNALING_PATHWAY	-0.235178	0.119048	0.243073
GO_POSITIVE_REGULATION_OF_MOLECULAR_FUNCTION	-0.19325	0.0795107	0.243424
GO_REGULATION_OF_CELL_ADHESION	-0.24528	0.113158	0.246179
GO_REGULATION_OF_ESTABLISHMENT_OF_PROTEIN_LOCALIZATION	-0.229901	0.104839	0.247987
GO_NEGATIVE_REGULATION_OF_CELL_MOTILITY	-0.297952	0.138686	0.249462
GO_POSITIVE_REGULATION_OF_PROTEIN_CONTAINING_COMPLEX_ASSEMBLY	-0.336619	0.160839	0.250001
GO_CELL	-0.208618	0.11437	0.250033
GO_IMMUNE_EFFECTOR_PROCESS	-0.189332	0.0615385	0.250756
GO_REGULATION_OF_MAP_KINASE_ACTIVITY	-0.298269	0.14578	0.256346
GO_REGULATION_OF_TRANSMEMBRANE_TRANSPORT	-0.274867	0.124378	0.257079
GO_CELLULAR_RESPONSE_TO_LIPID	-0.245897	0.132979	0.261005
GO_ENTRY_INTO_HOST	-0.305232	0.175127	0.265939
GO_REGULATION_OF_DNA_BINDING_TRANSCRIPTION_FACTOR_ACTIVITY	-0.276551	0.151899	0.266669
GO_SOMATODENDRITIC_COMPARTMENT	-0.248101	0.166667	0.268178
GO_DENDRITIC_TREE	-0.275011	0.166667	0.281288
GO_REGULATION_OF_IMMUNE_EFFECTOR_PROCESS	-0.255867	0.167959	0.282465
GO_POSITIVE_REGULATION_OF_ESTABLISHMENT_OF_PROTEIN_LOCALIZATION	-0.245604	0.145038	0.283538
GO_POSITIVE_REGULATION_OF_CELLULAR_PROTEIN_LOCALIZATION	-0.308377	0.183099	0.301043
GO_NIK_NF_KAPPAB_SIGNALING	-0.330702	0.175127	0.302459
GO_REGULATION_OF_CELL_DEATH	-0.181816	0.117845	0.309314
GO_REGULATION_OF_SMALL_MOLECULE_METABOLIC_PROCESS	-0.303971	0.183133	0.311162
GO_REGULATION_OF_PROTEIN_MODIFICATION_BY_SMALL_PROTEIN_CONJUGATION_OR_REMOVAL	-0.328233	0.199531	0.325939
GO_RESPONSE_TO_TOXIC_SUBSTANCE	-0.228056	0.189655	0.3274
GO_VIRAL_LIFE_CYCLE	-0.239626	0.184783	0.329276
GO_REGULATION_OF_TRANSFERASE_ACTIVITY	-0.214659	0.204918	0.33025
GO_ERK1_AND_ERK2_CASCADE	-0.246416	0.19403	0.332222
GO_HOMEOSTATIC_PROCESS	-0.179145	0.125373	0.332427
GO_REGULATION_OF_METAL_ION_TRANSPORT	-0.277241	0.194774	0.333445
GO_NEGATIVE_REGULATION_OF_LOCOMOTION	-0.261291	0.210526	0.34619
GO_ACTIVATION_OF_PROTEIN_KINASE_ACTIVITY	-0.294026	0.213368	0.346301
GO_PROTEIN_CONTAINING_COMPLEX_BINDING	-0.187429	0.165761	0.346348
GO_POSITIVE_REGULATION_OF_TRANSPORT	-0.188295	0.181009	0.351833
GO_POSITIVE_REGULATION_OF_CELL_CYCLE	-0.274265	0.226221	0.351942
GO_POSITIVE_REGULATION_OF_CELL_DEATH	-0.221635	0.201613	0.352381
GO_NEGATIVE_REGULATION_OF_INTRACELLULAR_SIGNAL_TRANSDUCTION	-0.275694	0.231343	0.358765
GO_REGULATION_OF_CELLULAR_AMIDE_METABOLIC_PROCESS	-0.234907	0.204787	0.359271
GO_MAINTENANCE_OF_LOCATION	-0.252177	0.233668	0.35932
GO_MYELOID_LEUKOCYTE_ACTIVATION	-0.192182	0.202417	0.359434
GO_REGULATION_OF_CELL_DEVELOPMENT	-0.220709	0.220812	0.360827
GO_ORGANELLE_INNER_MEMBRANE	-0.24319	0.216545	0.363696
GO_REGULATION_OF_CELLULAR_PROTEIN_CATABOLIC_PROCESS	-0.271007	0.228916	0.366013
GO_CENTRAL_NERVOUS_SYSTEM_DEVELOPMENT	-0.215049	0.223377	0.377972
GO_REGULATION_OF_PROTEIN_CONTAINING_COMPLEX_ASSEMBLY	-0.25219	0.247423	0.379514
GO_REGULATION_OF_PROTEIN_CATABOLIC_PROCESS	-0.242133	0.225316	0.379516
GO_CELL_ACTIVATION_INVOLVED_IN_IMMUNE_RESPONSE	-0.186841	0.24	0.38402
GO_POSITIVE_REGULATION_OF_CELL_CYCLE_PROCESS	-0.302298	0.268692	0.393662
GO_RESPONSE_TO_LIPID	-0.200489	0.219321	0.393777
GO_ENERGY_DERIVATION_BY_OXIDATION_OF_ORGANIC_COMPOUNDS	-0.285348	0.275943	0.394099
GO_RESPONSE_TO_BIOTIC_STIMULUS	-0.161921	0.21519	0.40405
GO_POSITIVE_REGULATION_OF_MAPK_CASCADE	-0.209734	0.253968	0.404805
GO_ORGANELLE_ASSEMBLY	-0.21975	0.270936	0.408443
GO_PROTEIN_CONTAINING_COMPLEX_ASSEMBLY	-0.163846	0.239203	0.413117
GO_REGULATION_OF_NERVOUS_SYSTEM_DEVELOPMENT	-0.219631	0.275956	0.416677
GO_REGULATION_OF_CATION_TRANSMEMBRANE_TRANSPORT	-0.278331	0.269048	0.422862
GO_CELLULAR_ION_HOMEOSTASIS	-0.204641	0.272472	0.433571
GO_NEGATIVE_REGULATION_OF_MULTI_ORGANISM_PROCESS	-0.281557	0.281106	0.434003
GO_POSITIVE_REGULATION_OF_TRANSFERASE_ACTIVITY	-0.226759	0.302158	0.434529
GO_POSITIVE_REGULATION_OF_PHOSPHORUS_METABOLIC_PROCESS	-0.180804	0.28	0.44626
GO_RESPONSE_TO_ALCOHOL	-0.249142	0.304965	0.461972
GO_POSITIVE_REGULATION_OF_SIGNALING	-0.155332	0.27	0.467653
GO_RNA_PROCESSING	-0.198424	0.306069	0.468165
GO_REGULATION_OF_ION_TRANSMEMBRANE_TRANSPORT	-0.257599	0.321608	0.469225
GO_RESPONSE_TO_VIRUS	-0.225766	0.368545	0.515048
GO_POSITIVE_REGULATION_OF_CATALYTIC_ACTIVITY	-0.161614	0.319527	0.516411
GO_REGULATION_OF_BINDING	-0.241017	0.37355	0.525622
GO_MITOCHONDRIAL_MATRIX	-0.249146	0.36715	0.527387
GO_REGULATION_OF_IMMUNE_RESPONSE	-0.165415	0.337423	0.529361
GO_CELLULAR_LIPID_METABOLIC_PROCESS	-0.202902	0.374046	0.530879
GO_MYELOID_LEUKOCYTE_MEDIATED_IMMUNITY	-0.171228	0.364146	0.531119
GO_NEGATIVE_REGULATION_OF_CELLULAR_COMPONENT_ORGANIZATION	-0.200239	0.354592	0.531321
GO_CYTOSKELETON_ORGANIZATION	-0.186332	0.392655	0.531774
GO_NEGATIVE_REGULATION_OF_RESPONSE_TO_STIMULUS	-0.156215	0.330556	0.532397
GO_CATION_TRANSMEMBRANE_TRANSPORT	-0.19287	0.375661	0.532633
GO_NEGATIVE_REGULATION_OF_TRANSFERASE_ACTIVITY	-0.257472	0.391858	0.53502
GO_DRUG_METABOLIC_PROCESS	-0.211753	0.363636	0.535972
GO_SYNAPSE_ORGANIZATION	-0.264721	0.366748	0.536675
GO_REGULATION_OF_PROTEIN_SERINE_THREONINE_KINASE_ACTIVITY	-0.22071	0.381188	0.537348
GO_POSITIVE_REGULATION_OF_PROTEIN_CATABOLIC_PROCESS	-0.262498	0.385681	0.537619
GO_CATION_TRANSPORT	-0.173497	0.416	0.538022
GO_RESPONSE_TO_INTERLEUKIN_1	-0.241842	0.404358	0.549081
GO_REGULATION_OF_MULTI_ORGANISM_PROCESS	-0.169829	0.401617	0.55089
GO_REGULATION_OF_TRANSPORT	-0.153534	0.381271	0.555243
GO_GENERATION_OF_PRECURSOR_METABOLITES_AND_ENERGY	-0.203209	0.396985	0.55532
GO_CHEMICAL_HOMEOSTASIS	-0.163801	0.405714	0.567676
GO_SUPRAMOLECULAR_FIBER_ORGANIZATION	-0.190326	0.391185	0.575265
GO_POSITIVE_REGULATION_OF_PROTEIN_MODIFICATION_PROCESS	-0.163338	0.430052	0.576454
GO_CHROMATIN_ORGANIZATION	-0.261456	0.419355	0.576863
GO_GAMETE_GENERATION	-0.253711	0.421053	0.577562
GO_MITOCHONDRION_ORGANIZATION	-0.203857	0.409207	0.579509
GO_REGULATION_OF_INTRACELLULAR_SIGNAL_TRANSDUCTION	-0.144288	0.419048	0.579675
GO_POSITIVE_REGULATION_OF_SUPRAMOLECULAR_FIBER_ORGANIZATION	-0.238047	0.428246	0.58185
GO_POSITIVE_REGULATION_OF_GTPASE_ACTIVITY	-0.229837	0.43609	0.58341
GO_POSITIVE_REGULATION_OF_IMMUNE_RESPONSE	-0.162427	0.435673	0.588401
GO_CELL_ADHESION_MOLECULE_BINDING	-0.167563	0.421053	0.588995
GO_MONOCARBOXYLIC_ACID_METABOLIC_PROCESS	-0.223091	0.459854	0.596789
GO_EMBRYONIC_MORPHOGENESIS	-0.23483	0.448441	0.597693
GO_ION_HOMEOSTASIS	-0.167938	0.465241	0.59887
GO_BEHAVIOR	-0.212327	0.451691	0.599935
GO_SECRETORY_GRANULE_MEMBRANE	-0.208065	0.464935	0.615083
GO_REGULATION_OF_INTRACELLULAR_TRANSPORT	-0.229392	0.485294	0.624228
GO_TERTIARY_GRANULE	-0.221479	0.468672	0.624584
GO_POSITIVE_REGULATION_OF_DEFENSE_RESPONSE	-0.174906	0.502732	0.624934
GO_PROTEIN_POLYMERIZATION	-0.224801	0.456633	0.625147
GO_REGULATION_OF_EXOCYTOSIS	-0.2531	0.472103	0.626201
GO_POSTTRANSCRIPTIONAL_REGULATION_OF_GENE_EXPRESSION	-0.171603	0.491573	0.627267
GO_RESPONSE_TO_TRANSFORMING_GROWTH_FACTOR_BETA	-0.255499	0.467416	0.639827
GO_ANTIGEN_PROCESSING_AND_PRESENTATION_OF_PEPTIDE_OR_POLYSACCHARIDE_ANTIGEN_VIA_MHC_CLASS_II	-0.257385	0.480519	0.641042
GO_AMIDE_BINDING	-0.225702	0.510256	0.653967
GO_ATP_METABOLIC_PROCESS	-0.217138	0.514493	0.655323
GO_REGULATION_OF_CELLULAR_PROTEIN_LOCALIZATION	-0.195025	0.5125	0.65687
GO_ACTIN_FILAMENT_POLYMERIZATION	-0.226349	0.495215	0.657021
GO_NEGATIVE_REGULATION_OF_CELL_CELL_ADHESION	-0.238995	0.489796	0.67011
GO_REGULATION_OF_PEPTIDYL_TYROSINE_PHOSPHORYLATION	-0.235264	0.520455	0.673336
GO_ELECTRON_TRANSPORT_CHAIN	-0.234818	0.562353	0.676087
GO_NEGATIVE_REGULATION_OF_CELL_DEATH	-0.153249	0.550725	0.679186
GO_REGULATION_OF_GTPASE_ACTIVITY	-0.206704	0.539267	0.679225
GO_REGULATION_OF_PROTEIN_POLYMERIZATION	-0.217902	0.545455	0.68011
GO_SUPRAMOLECULAR_COMPLEX	-0.168357	0.553247	0.680825
GO_ERYTHROCYTE_HOMEOSTASIS	-0.237704	0.513253	0.682479
GO_PLASMA_MEMBRANE_PROTEIN_COMPLEX	-0.191695	0.553846	0.682506
GO_POSITIVE_REGULATION_OF_KINASE_ACTIVITY	-0.190366	0.56	0.682824
GO_PERINUCLEAR_REGION_OF_CYTOPLASM	-0.162516	0.581267	0.683099
GO_REGULATION_OF_MITOTIC_CELL_CYCLE	-0.178509	0.597333	0.684295
GO_REGULATION_OF_CELL_MORPHOGENESIS	-0.202979	0.548309	0.684504
GO_ORGANIC_ACID_BIOSYNTHETIC_PROCESS	-0.204084	0.574939	0.692676
GO_RESPONSE_TO_EXTRACELLULAR_STIMULUS	-0.175071	0.573604	0.697546
GO_POSITIVE_REGULATION_OF_CELLULAR_BIOSYNTHETIC_PROCESS	-0.132481	0.636923	0.722486
GO_ANATOMICAL_STRUCTURE_HOMEOSTASIS	-0.227134	0.584135	0.723445
GO_MRNA_BINDING	-0.195503	0.64878	0.748846
GO_VESICLE_MEMBRANE	-0.150087	0.651558	0.749196
GO_HEAD_DEVELOPMENT	-0.174735	0.641361	0.762875
GO_ACTIN_POLYMERIZATION_OR_DEPOLYMERIZATION	-0.200367	0.63285	0.763477
GO_PROTEIN_DIMERIZATION_ACTIVITY	-0.144581	0.701058	0.767919
GO_EMBRYO_DEVELOPMENT	-0.159283	0.664987	0.769531
GO_GTPASE_ACTIVITY	-0.186729	0.650367	0.770918
GO_REGULATION_OF_PROTEASOMAL_PROTEIN_CATABOLIC_PROCESS	-0.229821	0.63242	0.773128
GO_RESPONSE_TO_LIGHT_STIMULUS	-0.197622	0.653938	0.781402
GO_REGULATION_OF_VESICLE_MEDIATED_TRANSPORT	-0.157494	0.688482	0.790265
GO_MITOCHONDRIAL_PROTEIN_COMPLEX	-0.204539	0.690307	0.804449
GO_REGULATION_OF_HORMONE_SECRETION	-0.210311	0.660333	0.812548
GO_NEGATIVE_REGULATION_OF_PROTEIN_MODIFICATION_PROCESS	-0.148513	0.702842	0.821801
GO_PEPTIDYL_TYROSINE_MODIFICATION	-0.186993	0.710183	0.826929
GO_REGULATION_OF_CELLULAR_COMPONENT_BIOGENESIS	-0.140864	0.770718	0.827098
GO_PROTON_TRANSMEMBRANE_TRANSPORT	-0.199335	0.687023	0.829189
GO_PURINE_CONTAINING_COMPOUND_METABOLIC_PROCESS	-0.198368	0.692661	0.829689
GO_TRANSMEMBRANE_RECEPTOR_PROTEIN_SERINE_THREONINE_KINASE_SIGNALING_PATHWAY	-0.199084	0.696507	0.830442
GO_REGULATION_OF_KINASE_ACTIVITY	-0.136613	0.722922	0.832157
GO_CELL_CYCLE_ARREST	-0.200435	0.742389	0.856038
GO_NEURON_PROJECTION	-0.134323	0.792915	0.856707
GO_MITOCHONDRION	-0.118659	0.798851	0.857249
GO_LIPID_BIOSYNTHETIC_PROCESS	-0.159519	0.757256	0.859709
GO_CYTOSKELETAL_PROTEIN_BINDING	-0.135668	0.775401	0.863542
GO_OXIDATION_REDUCTION_PROCESS	-0.134378	0.807692	0.868756
GO_ACTIN_CYTOSKELETON	-0.152714	0.782842	0.870246
GO_REGULATION_OF_ENDOCYTOSIS	-0.189933	0.767677	0.870282
GO_CELL_CYCLE_PHASE_TRANSITION	-0.150023	0.788321	0.870764
GO_MRNA_PROCESSING	-0.177748	0.795122	0.871919
GO_HORMONE_TRANSPORT	-0.187197	0.784689	0.873846
GO_INTRINSIC_COMPONENT_OF_ORGANELLE_MEMBRANE	-0.191849	0.780601	0.874196
GO_POSITIVE_REGULATION_OF_ORGANELLE_ORGANIZATION	-0.139742	0.800539	0.88042
GO_DEVELOPMENTAL_PROCESS_INVOLVED_IN_REPRODUCTION	-0.151113	0.79597	0.883612
GO_NEGATIVE_REGULATION_OF_KINASE_ACTIVITY	-0.179183	0.791349	0.884432
GO_ORGANIC_ANION_TRANSPORT	-0.191733	0.784922	0.884573
GO_POSITIVE_REGULATION_OF_CELLULAR_CATABOLIC_PROCESS	-0.166252	0.783848	0.885406
GO_CELLULAR_RESPIRATION	-0.188724	0.791011	0.885684
GO_ROUGH_ENDOPLASMIC_RETICULUM	-0.178091	0.803618	0.888131
GO_CADHERIN_BINDING	-0.127439	0.859195	0.891041
GO_TRANSMEMBRANE_TRANSPORT	-0.11205	0.889855	0.891125
GO_NEGATIVE_REGULATION_OF_MITOTIC_CELL_CYCLE	-0.168746	0.853018	0.891351
GO_RESPONSE_TO_RADIATION	-0.149552	0.834184	0.891464
GO_POSITIVE_REGULATION_OF_CATABOLIC_PROCESS	-0.151456	0.860406	0.900247
GO_REGULATION_OF_CELLULAR_CATABOLIC_PROCESS	-0.108742	0.910569	0.901012
GO_PEPTIDYL_AMINO_ACID_MODIFICATION	-0.115398	0.860465	0.901877
GO_RESPONSE_TO_INORGANIC_SUBSTANCE	-0.12997	0.884409	0.90212
GO_VIRAL_GENOME_REPLICATION	-0.172705	0.870246	0.919534
GO_ESTABLISHMENT_OF_LOCALIZATION_IN_CELL	-0.157837	0.865672	0.920573
GO_CATALYTIC_COMPLEX	-0.108231	0.913947	0.920817
GO_EXTRINSIC_COMPONENT_OF_MEMBRANE	-0.162759	0.890661	0.920979
GO_STRESS_ACTIVATED_PROTEIN_KINASE_SIGNALING_CASCADE	-0.158727	0.877778	0.922434
GO_ANTIGEN_RECEPTOR_MEDIATED_SIGNALING_PATHWAY	-0.156367	0.89781	0.923682
GO_DEFENSE_RESPONSE_TO_BACTERIUM	-0.16415	0.898734	0.924758
GO_SIGNAL_RELEASE	-0.147991	0.913462	0.931454
GO_IMMUNE_RESPONSE_REGULATING_CELL_SURFACE_RECEPTOR_SIGNALING_PATHWAY	-0.130581	0.898477	0.931474
GO_MEMBRANE_PROTEIN_COMPLEX	-0.0972462	0.935657	0.931643
GO_POSITIVE_REGULATION_OF_CELLULAR_AMIDE_METABOLIC_PROCESS	-0.156674	0.892523	0.932818
GO_FC_RECEPTOR_SIGNALING_PATHWAY	-0.146517	0.897862	0.936642
GO_COATED_VESICLE	-0.148665	0.907543	0.936716
GO_NEGATIVE_REGULATION_OF_ORGANELLE_ORGANIZATION	-0.127919	0.92804	0.941291
GO_REGULATION_OF_CATABOLIC_PROCESS	-0.0938268	0.96034	0.954515
GO_CHROMOSOME_ORGANIZATION	-0.0843002	0.997608	0.997965
GO_ENVELOPE	-0.0599992	1	0.998939

## Sheet: C3 VS C6
GO UP in C3	ES	NOM p-val	FDR q-val
GO_NUCLEAR_TRANSCRIBED_MRNA_CATABOLIC_PROCESS_NONSENSE_MEDIATED_DECAY	0.623775	0	0
GO_CYTOSOLIC_RIBOSOME	0.58249	0	0.000380952
GO_STRUCTURAL_CONSTITUENT_OF_RIBOSOME	0.584253	0	0.000571428
GO_RIBOSOMAL_SUBUNIT	0.546221	0	0.000841576
GO_TRANSLATIONAL_INITIATION	0.530233	0	0.00129013
GO_ESTABLISHMENT_OF_PROTEIN_LOCALIZATION_TO_ENDOPLASMIC_RETICULUM	0.537207	0	0.00150515
GO_RIBOSOME	0.504708	0	0.0015518
GO_COTRANSLATIONAL_PROTEIN_TARGETING_TO_MEMBRANE	0.537207	0	0.00180618
GO_CYTOSOLIC_LARGE_RIBOSOMAL_SUBUNIT	0.625759	0	0.00284079
GO_LARGE_RIBOSOMAL_SUBUNIT	0.569962	0	0.00301081
GO_PROTEIN_LOCALIZATION_TO_ENDOPLASMIC_RETICULUM	0.483328	0	0.0069979
GO_GAMETE_GENERATION	0.462764	0	0.0109468
GO_RIBOSOME_BIOGENESIS	0.53093	0.00340136	0.0177495
GO_RIBONUCLEOPROTEIN_COMPLEX_BIOGENESIS	0.515643	0	0.0178273
GO_PROTEIN_TARGETING_TO_MEMBRANE	0.422529	0	0.018623
GO_POSITIVE_REGULATION_OF_CYTOKINE_SECRETION	0.522243	0	0.0207901
GO_TISSUE_REMODELING	0.46218	0.00413223	0.0240847
GO_DEVELOPMENTAL_PROCESS_INVOLVED_IN_REPRODUCTION	0.358657	0	0.0260704
GO_MULTICELLULAR_ORGANISM_REPRODUCTION	0.36204	0	0.0471491
GO_LIPID_CATABOLIC_PROCESS	0.45913	0.01	0.0804722
GO_MALE_GAMETE_GENERATION	0.44229	0.0103806	0.0877822
GO_NUCLEAR_TRANSCRIBED_MRNA_CATABOLIC_PROCESS	0.391609	0	0.0881586
GO_MULTI_ORGANISM_REPRODUCTIVE_PROCESS	0.31694	0	0.107023
GO_EXTRACELLULAR_STRUCTURE_ORGANIZATION	0.366201	0.021645	0.107287
GO_ENDOPEPTIDASE_ACTIVITY	0.421482	0.0226415	0.108823
GO_ESTABLISHMENT_OF_PROTEIN_LOCALIZATION_TO_MEMBRANE	0.350077	0	0.111578
GO_SEXUAL_REPRODUCTION	0.341233	0	0.111768
GO_PROTEIN_TARGETING	0.324088	0.00505051	0.144323
GO_INTEGRIN_BINDING	0.398312	0.0189394	0.149063
GO_POSITIVE_REGULATION_OF_PEPTIDE_SECRETION	0.367025	0.019084	0.1615
GO_LYSOSOMAL_LUMEN	0.405606	0.0431894	0.165709
GO_AZUROPHIL_GRANULE	0.355858	0.0185185	0.166095
GO_NEGATIVE_REGULATION_OF_LYMPHOCYTE_ACTIVATION	0.386792	0.0227273	0.169817
GO_PROTEIN_PROCESSING	0.426482	0.052459	0.193215
GO_PROTEIN_MATURATION	0.358164	0.0452962	0.252485
GO_POSITIVE_REGULATION_OF_SECRETION	0.308138	0.0567686	0.277319
GO_CELLULAR_COMPONENT_DISASSEMBLY	0.328228	0.0617761	0.278518
GO_ANATOMICAL_STRUCTURE_HOMEOSTASIS	0.310823	0.0692641	0.299612
GO_MULTI_MULTICELLULAR_ORGANISM_PROCESS	0.380159	0.108108	0.301216
GO_ORGANELLE_INNER_MEMBRANE	0.390631	0.0702341	0.3027
GO_RECEPTOR_COMPLEX	0.302417	0.0445545	0.302727
GO_REGULATION_OF_CELLULAR_RESPONSE_TO_GROWTH_FACTOR_STIMULUS	0.354301	0.0599251	0.30284
GO_REGULATION_OF_APOPTOTIC_SIGNALING_PATHWAY	0.299047	0.0688073	0.302896
GO_VACUOLAR_LUMEN	0.310053	0.0689655	0.303067
GO_SKELETAL_SYSTEM_DEVELOPMENT	0.302867	0.03125	0.30374
GO_VIRAL_GENE_EXPRESSION	0.307892	0.06639	0.303825
GO_POSITIVE_REGULATION_OF_I_KAPPAB_KINASE_NF_KAPPAB_SIGNALING	0.319097	0.0798479	0.304127
GO_POSITIVE_REGULATION_OF_ESTABLISHMENT_OF_PROTEIN_LOCALIZATION	0.304002	0.0742358	0.305071
GO_LEUKOCYTE_MEDIATED_IMMUNITY	0.21246	0.032967	0.305133
GO_VACUOLE	0.227121	0.027027	0.306541
GO_PEPTIDASE_ACTIVITY	0.308367	0.0476191	0.308344
GO_MAINTENANCE_OF_LOCATION	0.289929	0.0655022	0.314414
GO_CELL_JUNCTION_ORGANIZATION	0.324208	0.084507	0.315044
GO_STRUCTURAL_MOLECULE_ACTIVITY	0.265993	0.0411765	0.315876
GO_POSITIVE_REGULATION_OF_INTERLEUKIN_6_PRODUCTION	0.366952	0.09319	0.324105
GO_REPRODUCTION	0.234419	0.057554	0.33421
GO_RESPONSE_TO_TRANSFORMING_GROWTH_FACTOR_BETA	0.313795	0.100386	0.337194
GO_NEGATIVE_REGULATION_OF_CELL_ACTIVATION	0.286506	0.0893617	0.352803
GO_CYTOPLASMIC_SIDE_OF_MEMBRANE	0.343249	0.107011	0.398356
GO_RESPONSE_TO_ETHANOL	0.349928	0.124161	0.440873
GO_REGULATION_OF_NEUROTRANSMITTER_LEVELS	0.299768	0.172535	0.502647
GO_TISSUE_HOMEOSTASIS	0.31555	0.166667	0.507051
GO_NEGATIVE_REGULATION_OF_APOPTOTIC_SIGNALING_PATHWAY	0.309871	0.155303	0.509265
GO_PEPTIDE_BIOSYNTHETIC_PROCESS	0.236681	0.153846	0.512164
GO_CARBOHYDRATE_DERIVATIVE_CATABOLIC_PROCESS	0.314627	0.164336	0.513967
GO_TRANSFORMING_GROWTH_FACTOR_BETA_RECEPTOR_SIGNALING_PATHWAY	0.307493	0.195312	0.514058
GO_CYTOKINE_SECRETION	0.259284	0.15	0.516046
GO_PROTEIN_CONTAINING_COMPLEX_BINDING	0.202772	0.136752	0.517122
GO_MULTICELLULAR_ORGANISMAL_HOMEOSTASIS	0.233045	0.111111	0.51737
GO_ACTOMYOSIN_STRUCTURE_ORGANIZATION	0.296112	0.183746	0.518347
GO_REGULATION_OF_TRANS_SYNAPTIC_SIGNALING	0.272391	0.181467	0.518881
GO_NEGATIVE_REGULATION_OF_CELL_ADHESION	0.232828	0.152174	0.522207
GO_RNA_CATABOLIC_PROCESS	0.254482	0.129464	0.522783
GO_TRANSITION_METAL_ION_BINDING	0.239251	0.185841	0.523192
GO_REGULATION_OF_PEPTIDE_SECRETION	0.239352	0.175926	0.527207
GO_SIGNAL_RELEASE	0.277624	0.184211	0.528008
GO_SECRETORY_GRANULE_MEMBRANE	0.214505	0.177143	0.529476
GO_MYELOID_LEUKOCYTE_MEDIATED_IMMUNITY	0.201212	0.0804598	0.529733
GO_SYNAPTIC_SIGNALING	0.255079	0.199134	0.533324
GO_NIK_NF_KAPPAB_SIGNALING	0.321581	0.165017	0.53392
GO_PLASMA_MEMBRANE_PROTEIN_COMPLEX	0.226543	0.209756	0.551358
GO_AMIDE_BIOSYNTHETIC_PROCESS	0.218784	0.191011	0.551882
GO_BEHAVIOR	0.252086	0.21659	0.555148
GO_REGULATION_OF_SECRETION	0.201521	0.197674	0.557486
GO_RIBONUCLEOPROTEIN_COMPLEX	0.230252	0.195652	0.558781
GO_REGULATION_OF_ESTABLISHMENT_OF_PROTEIN_LOCALIZATION	0.217013	0.194286	0.562175
GO_BONE_DEVELOPMENT	0.287531	0.211726	0.5634
GO_POSITIVE_REGULATION_OF_GROWTH	0.292266	0.21147	0.565457
GO_NEURON_TO_NEURON_SYNAPSE	0.254169	0.235772	0.589755
GO_REGULATION_OF_HORMONE_SECRETION	0.30993	0.249191	0.59344
GO_POSITIVE_REGULATION_OF_CELL_CYCLE	0.30418	0.25	0.601727
GO_POSITIVE_REGULATION_OF_CELLULAR_PROTEIN_LOCALIZATION	0.27768	0.285714	0.610815
GO_POSITIVE_REGULATION_OF_MAP_KINASE_ACTIVITY	0.29103	0.238267	0.612703
GO_I_KAPPAB_KINASE_NF_KAPPAB_SIGNALING	0.213952	0.260417	0.6314
GO_GLYCOPROTEIN_METABOLIC_PROCESS	0.238227	0.25283	0.635069
GO_EXTRINSIC_COMPONENT_OF_PLASMA_MEMBRANE	0.296027	0.276527	0.637597
GO_PEPTIDE_METABOLIC_PROCESS	0.189095	0.275	0.651292
GO_MOLECULAR_TRANSDUCER_ACTIVITY	0.187196	0.269504	0.652059
GO_SEX_DIFFERENTIATION	0.278518	0.275986	0.652314
GO_LIPID_LOCALIZATION	0.235738	0.310044	0.653568
GO_OSSIFICATION	0.238593	0.309322	0.655094
GO_FICOLIN_1_RICH_GRANULE	0.245675	0.304	0.656955
GO_CELL_MATRIX_ADHESION	0.269009	0.290909	0.657346
GO_INTRINSIC_COMPONENT_OF_PLASMA_MEMBRANE	0.172908	0.315315	0.659609
GO_GTPASE_ACTIVITY	0.223325	0.357143	0.661065
GO_REGULATION_OF_LIPID_METABOLIC_PROCESS	0.242783	0.259109	0.661705
GO_CELL_SUBSTRATE_JUNCTION	0.194202	0.26875	0.662515
GO_GLIOGENESIS	0.219209	0.315789	0.664962
GO_REGULATION_OF_PROTEIN_LOCALIZATION	0.18654	0.320312	0.666691
GO_ESTABLISHMENT_OF_PROTEIN_LOCALIZATION_TO_ORGANELLE	0.20536	0.27439	0.667618
GO_EXTRINSIC_COMPONENT_OF_MEMBRANE	0.258116	0.31203	0.66831
GO_POSITIVE_REGULATION_OF_LEUKOCYTE_PROLIFERATION	0.283331	0.337423	0.668986
GO_TYPE_I_INTERFERON_PRODUCTION	0.262668	0.369176	0.700533
GO_MONOVALENT_INORGANIC_CATION_TRANSPORT	0.238846	0.380783	0.709459
GO_REGULATION_OF_TRANSMEMBRANE_RECEPTOR_PROTEIN_SERINE_THREONINE_KINASE_SIGNALING_PATHWAY	0.252364	0.378676	0.712492
GO_PROTEIN_DOMAIN_SPECIFIC_BINDING	0.19497	0.411765	0.713749
GO_PROTEIN_LOCALIZATION_TO_ORGANELLE	0.189793	0.407143	0.714494
GO_CYTOKINE_BINDING	0.252881	0.392453	0.71798
GO_JNK_CASCADE	0.269334	0.39557	0.718313
GO_PEPTIDE_SECRETION	0.19226	0.347305	0.7207
GO_REGULATION_OF_PROTEIN_BINDING	0.244554	0.358025	0.720762
GO_ESTABLISHMENT_OF_LOCALIZATION_IN_CELL	0.247665	0.393617	0.720787
GO_REGULATION_OF_CYTOSOLIC_CALCIUM_ION_CONCENTRATION	0.222314	0.395833	0.725765
GO_REPRODUCTIVE_SYSTEM_DEVELOPMENT	0.217131	0.358333	0.726205
GO_PHOSPHOLIPID_METABOLIC_PROCESS	0.254684	0.403448	0.736016
GO_DETECTION_OF_STIMULUS	0.248494	0.399306	0.737131
GO_HORMONE_TRANSPORT	0.249637	0.425	0.738758
GO_PROTEIN_SERINE_THREONINE_KINASE_ACTIVITY	0.233725	0.39781	0.743026
GO_LIPID_BIOSYNTHETIC_PROCESS	0.198342	0.433594	0.746816
GO_REGULATION_OF_ION_TRANSPORT	0.188129	0.444976	0.750242
GO_TISSUE_MORPHOGENESIS	0.18942	0.437186	0.750994
GO_POSITIVE_REGULATION_OF_ION_TRANSPORT	0.235664	0.460714	0.754277
GO_POSITIVE_REGULATION_OF_NERVOUS_SYSTEM_DEVELOPMENT	0.188216	0.490099	0.762508
GO_TRANSCRIPTION_COREPRESSOR_ACTIVITY	0.256765	0.478689	0.773113
GO_CELLULAR_AMIDE_METABOLIC_PROCESS	0.161394	0.471545	0.773679
GO_POSITIVE_REGULATION_OF_PROTEIN_KINASE_B_SIGNALING	0.261145	0.446945	0.774083
GO_ORGANOPHOSPHATE_BIOSYNTHETIC_PROCESS	0.230362	0.466667	0.775767
GO_ANCHORING_JUNCTION	0.152917	0.522936	0.778363
GO_REGULATION_OF_HORMONE_LEVELS	0.205418	0.480315	0.77918
GO_POSITIVE_REGULATION_OF_PROTEIN_SERINE_THREONINE_KINASE_ACTIVITY	0.212196	0.47451	0.786784
GO_REGULATION_OF_B_CELL_ACTIVATION	0.261492	0.471223	0.789574
GO_CELL_SUBSTRATE_ADHESION	0.188358	0.537688	0.793352
GO_EMBRYONIC_MORPHOGENESIS	0.190443	0.493274	0.793884
GO_ACTIVATION_OF_PROTEIN_KINASE_ACTIVITY	0.221044	0.483193	0.79411
GO_NEGATIVE_REGULATION_OF_NERVOUS_SYSTEM_DEVELOPMENT	0.197153	0.501976	0.796686
GO_ACTIN_FILAMENT_BUNDLE_ORGANIZATION	0.237245	0.488525	0.799379
GO_REACTIVE_OXYGEN_SPECIES_METABOLIC_PROCESS	0.194923	0.485477	0.804146
GO_FATTY_ACID_METABOLIC_PROCESS	0.223026	0.616393	0.872488
GO_ORGANELLE_ASSEMBLY	0.167967	0.652381	0.873716
GO_PEPTIDYL_AMINO_ACID_MODIFICATION	0.151115	0.655172	0.875303
GO_MRNA_METABOLIC_PROCESS	0.157349	0.676647	0.875801
GO_MACROMOLECULE_CATABOLIC_PROCESS	0.137528	0.652632	0.877427
GO_REGULATION_OF_NERVOUS_SYSTEM_DEVELOPMENT	0.150545	0.688312	0.878149
GO_EPITHELIAL_TUBE_MORPHOGENESIS	0.194813	0.615385	0.87822
GO_CHROMOSOME_ORGANIZATION	0.190443	0.639676	0.878853
GO_CELL_JUNCTION	0.133576	0.717647	0.878912
GO_PROTEIN_LOCALIZATION_TO_MEMBRANE	0.155968	0.668675	0.882628
GO_REGULATION_OF_MAP_KINASE_ACTIVITY	0.191513	0.587983	0.883176
GO_NEGATIVE_REGULATION_OF_CELLULAR_COMPONENT_ORGANIZATION	0.157234	0.666667	0.884533
GO_RENAL_SYSTEM_DEVELOPMENT	0.204969	0.585106	0.885672
GO_DEPHOSPHORYLATION	0.188828	0.607143	0.886152
GO_REGULATION_OF_PROTEIN_SERINE_THREONINE_KINASE_ACTIVITY	0.170348	0.6	0.886488
GO_PEPTIDYL_SERINE_MODIFICATION	0.208953	0.582143	0.891093
GO_NEGATIVE_REGULATION_OF_CELL_CELL_ADHESION	0.205713	0.603053	0.894875
GO_CIRCULATORY_SYSTEM_PROCESS	0.1681	0.638767	0.895558
GO_HYDROLASE_ACTIVITY_ACTING_ON_ACID_ANHYDRIDES	0.161182	0.61017	0.896715
GO_DEVELOPMENT_OF_PRIMARY_SEXUAL_CHARACTERISTICS	0.235971	0.570397	0.901114
GO_INTRACELLULAR_PROTEIN_TRANSPORT	0.128941	0.744966	0.907219
GO_CARBOHYDRATE_DERIVATIVE_METABOLIC_PROCESS	0.144667	0.736196	0.908355
GO_CELL_DIVISION	0.181688	0.696154	0.91175
GO_POSITIVE_REGULATION_OF_NF_KAPPAB_TRANSCRIPTION_FACTOR_ACTIVITY	0.207935	0.660777	0.92375
GO_GOLGI_APPARATUS	0.131526	0.754386	0.925973
GO_CELL_JUNCTION_ASSEMBLY	0.197085	0.694352	0.936133
GO_B_CELL_ACTIVATION	0.165906	0.683761	0.93746
GO_NEGATIVE_REGULATION_OF_PHOSPHORUS_METABOLIC_PROCESS	0.151359	0.73516	0.940705
GO_CARDIAC_CHAMBER_MORPHOGENESIS	0.20359	0.783606	0.942361
GO_SULFUR_COMPOUND_METABOLIC_PROCESS	0.191171	0.759322	0.943477
GO_LATE_ENDOSOME	0.173495	0.790262	0.944459
GO_RIBONUCLEOTIDE_BINDING	0.114058	0.883721	0.947172
GO_TRANSFERASE_COMPLEX	0.195306	0.743506	0.94778
GO_ACTIN_BINDING	0.159644	0.76	0.94936
GO_CARDIAC_CHAMBER_DEVELOPMENT	0.20359	0.692568	0.950134
GO_MEMBRANE_PROTEIN_COMPLEX	0.125343	0.884354	0.951431
GO_REGULATION_OF_AXONOGENESIS	0.198968	0.790323	0.951736
GO_PROTEIN_CATABOLIC_PROCESS	0.129635	0.853503	0.952014
GO_POSITIVE_REGULATION_OF_RESPONSE_TO_BIOTIC_STIMULUS	0.145892	0.780612	0.95327
GO_ACTIN_CYTOSKELETON	0.14261	0.784615	0.954062
GO_EMBRYONIC_ORGAN_DEVELOPMENT	0.172497	0.8	0.954319
GO_CELLULAR_MACROMOLECULE_CATABOLIC_PROCESS	0.120638	0.868217	0.95605
GO_ADENYL_NUCLEOTIDE_BINDING	0.134367	0.809524	0.956427
GO_PHAGOCYTIC_VESICLE_MEMBRANE	0.187805	0.755034	0.956996
GO_CATALYTIC_COMPLEX	0.153953	0.768116	0.958801
GO_MITOCHONDRION	0.135113	0.815951	0.96062
GO_PEPTIDE_HORMONE_SECRETION	0.17484	0.879085	0.972477
GO_INORGANIC_ION_TRANSMEMBRANE_TRANSPORT	0.120212	0.934673	0.97664
GO_REGIONALIZATION	0.195352	0.829932	0.977819
GO_POSITIVE_REGULATION_OF_DNA_BINDING_TRANSCRIPTION_FACTOR_ACTIVITY	0.162344	0.840989	0.978067
GO_ACTIN_FILAMENT_BASED_PROCESS	0.119408	0.911111	0.978759
GO_RHO_PROTEIN_SIGNAL_TRANSDUCTION	0.159762	0.875	0.978859
GO_PROTEOLYSIS	0.105656	0.958333	0.978986
GO_RNA_SPLICING	0.174008	0.840391	0.979009
GO_DRUG_BINDING	0.114322	0.911243	0.979121
GO_NEGATIVE_REGULATION_OF_KINASE_ACTIVITY	0.157387	0.854785	0.980282
GO_PIGMENT_GRANULE	0.144323	0.915966	0.980533
GO_PROTEIN_MODIFICATION_BY_SMALL_PROTEIN_CONJUGATION	0.121326	0.926471	0.980697
GO_REGULATION_OF_WOUND_HEALING	0.17905	0.850534	0.981006
GO_GTPASE_REGULATOR_ACTIVITY	0.161805	0.82971	0.981378
GO_NUCLEOSIDE_TRIPHOSPHATASE_REGULATOR_ACTIVITY	0.152044	0.843621	0.981955
GO_PHAGOCYTIC_VESICLE	0.119546	0.940367	0.982662
GO_REGULATION_OF_PROTEIN_MODIFICATION_BY_SMALL_PROTEIN_CONJUGATION_OR_REMOVAL	0.154628	0.876221	0.983212
GO_REGULATION_OF_CELL_SIZE	0.155583	0.943144	0.983837
GO_CELL_CORTEX	0.119778	0.939394	0.984251
GO_LAMELLIPODIUM	0.130221	0.954167	0.985074
GO_ESTABLISHMENT_OF_ORGANELLE_LOCALIZATION	0.147298	0.915254	0.9861
GO_DENDRITE_DEVELOPMENT	0.167757	0.880503	0.986492
GO_GLYCEROLIPID_METABOLIC_PROCESS	0.154755	0.902778	0.987031
GO_PROTEIN_MODIFICATION_BY_SMALL_PROTEIN_CONJUGATION_OR_REMOVAL	0.109969	0.979695	0.987409
GO_CORTICAL_CYTOSKELETON	0.118926	1	0.997574
GO_MITOCHONDRIAL_ENVELOPE	0.0801161	1	0.999079
GO_POSTSYNAPSE	0.0954774	0.973684	0.999693
GO_SYNAPSE	0.0872194	0.990826	0.999762
GO UP in C6	ES	NOM p-val	FDR q-val
GO_MONOCYTE_CHEMOTAXIS	-0.708477	0	0.0221099
GO_GLYCOSAMINOGLYCAN_BINDING	-0.630757	0.00136426	0.0500939
GO_LYMPHOCYTE_MIGRATION	-0.673693	0	0.0502727
GO_G_PROTEIN_COUPLED_RECEPTOR_BINDING	-0.623839	0.00136054	0.0574247
GO_RESPONSE_TO_TUMOR_NECROSIS_FACTOR	-0.534082	0	0.0589321
GO_RESPONSE_TO_INTERFERON_GAMMA	-0.544446	0	0.0647774
GO_NEUTROPHIL_MIGRATION	-0.580812	0.00136054	0.0766123
GO_ERK1_AND_ERK2_CASCADE	-0.507003	0.00253807	0.0806095
GO_RECEPTOR_REGULATOR_ACTIVITY	-0.526981	0	0.0851941
GO_RESPONSE_TO_INTERLEUKIN_1	-0.564919	0	0.087198
GO_GRANULOCYTE_MIGRATION	-0.573817	0.00265252	0.0892544
GO_VIRAL_LIFE_CYCLE	-0.502821	0.00389105	0.0900402
GO_HUMORAL_IMMUNE_RESPONSE	-0.548358	0.0013587	0.0901775
GO_POSITIVE_REGULATION_OF_ERK1_AND_ERK2_CASCADE	-0.532601	0.00531915	0.0915273
GO_MONONUCLEAR_CELL_MIGRATION	-0.62236	0.00139276	0.0966973
GO_INFLAMMATORY_RESPONSE	-0.433474	0.00112233	0.0972998
GO_RESPONSE_TO_CALCIUM_ION	-0.596622	0.00686813	0.099882
GO_LEUKOCYTE_CHEMOTAXIS	-0.47902	0.00127226	0.111704
GO_CYTOKINE_ACTIVITY	-0.565292	0.00546448	0.116077
GO_NEURON_DEATH	-0.515652	0.00134953	0.1188
GO_DNA_BINDING_TRANSCRIPTION_ACTIVATOR_ACTIVITY	-0.510673	0.010568	0.128172
GO_RESPONSE_TO_HYDROGEN_PEROXIDE	-0.58577	0.00436047	0.199931
GO_CELLULAR_RESPONSE_TO_ACID_CHEMICAL	-0.594294	0.0114778	0.20576
GO_CYTOKINE_RECEPTOR_BINDING	-0.487079	0.00915033	0.207878
GO_POSITIVE_REGULATION_OF_MAPK_CASCADE	-0.426576	0.00243309	0.210404
GO_DEFENSE_RESPONSE	-0.361764	0	0.211342
GO_MYELOID_LEUKOCYTE_MIGRATION	-0.459271	0.00381679	0.213233
GO_REGULATION_OF_MAPK_CASCADE	-0.402839	0.00583431	0.214254
GO_POSITIVE_REGULATION_OF_GTPASE_ACTIVITY	-0.462761	0.00525624	0.215675
GO_RESPONSE_TO_PURINE_CONTAINING_COMPOUND	-0.568683	0.0136571	0.216591
GO_PLATELET_ALPHA_GRANULE	-0.552991	0.017192	0.219118
GO_CELL_CHEMOTAXIS	-0.426542	0.00969697	0.219694
GO_NEGATIVE_REGULATION_OF_MULTI_ORGANISM_PROCESS	-0.489266	0.00527705	0.220074
GO_CYTOKINE_MEDIATED_SIGNALING_PATHWAY	-0.379797	0.00566251	0.222348
GO_REGULATION_OF_PLASMA_LIPOPROTEIN_PARTICLE_LEVELS	-0.585546	0.0130435	0.223018
GO_RESPONSE_TO_ACID_CHEMICAL	-0.489447	0.0248619	0.243308
GO_PLATELET_DEGRANULATION	-0.50651	0.0188679	0.244841
GO_REGULATION_OF_VASCULATURE_DEVELOPMENT	-0.463739	0.020915	0.248302
GO_RESPONSE_TO_CYTOKINE	-0.351768	0.0010627	0.26053
GO_RESPONSE_TO_ORGANOPHOSPHORUS	-0.568683	0.0189781	0.262024
GO_RESPONSE_TO_ANTIBIOTIC	-0.46303	0.015748	0.266636
GO_RECEPTOR_MEDIATED_ENDOCYTOSIS	-0.446344	0.0142303	0.267635
GO_SIGNAL_TRANSDUCTION_BY_PROTEIN_PHOSPHORYLATION	-0.376181	0.0103211	0.277139
GO_DEFENSE_RESPONSE_TO_OTHER_ORGANISM	-0.351637	0.0021692	0.284041
GO_CELLULAR_RESPONSE_TO_CHEMICAL_STRESS	-0.454609	0.0198151	0.318697
GO_REGULATION_OF_LEUKOCYTE_CHEMOTAXIS	-0.479629	0.0287278	0.32341
GO_REGULATION_OF_GTPASE_ACTIVITY	-0.430298	0.0136816	0.324341
GO_RESPONSE_TO_BIOTIC_STIMULUS	-0.335728	0.0063762	0.327891
GO_AMIDE_BINDING	-0.450419	0.0283401	0.331714
GO_CARBOHYDRATE_BINDING	-0.510527	0.0355114	0.332408
GO_RESPONSE_TO_REACTIVE_OXYGEN_SPECIES	-0.460792	0.0438356	0.334922
GO_REGULATION_OF_CELL_POPULATION_PROLIFERATION	-0.343999	0.00425532	0.336067
GO_NEURON_APOPTOTIC_PROCESS	-0.459597	0.021025	0.338033
GO_LEUKOCYTE_MIGRATION	-0.368795	0.021102	0.358495
GO_NEGATIVE_REGULATION_OF_BIOSYNTHETIC_PROCESS	-0.351935	0.0144284	0.359115
GO_ENDOCYTOSIS	-0.356148	0.0221445	0.368829
GO_MULTICELLULAR_ORGANISM_GROWTH	-0.507485	0.0618847	0.370967
GO_G_PROTEIN_COUPLED_RECEPTOR_SIGNALING_PATHWAY	-0.373109	0.041816	0.371898
GO_RESPONSE_TO_BACTERIUM	-0.34954	0.0233918	0.372138
GO_REGULATION_OF_ANATOMICAL_STRUCTURE_MORPHOGENESIS	-0.334894	0.0166297	0.373025
GO_LEUKOCYTE_DIFFERENTIATION	-0.364758	0.0268378	0.373634
GO_REGULATION_OF_LEUKOCYTE_MIGRATION	-0.412038	0.0508906	0.373753
GO_RESPONSE_TO_OXIDATIVE_STRESS	-0.393528	0.0477987	0.373825
GO_RESPONSE_TO_ORGANIC_CYCLIC_COMPOUND	-0.365309	0.0164127	0.374116
GO_RESPONSE_TO_METAL_ION	-0.409051	0.0393401	0.374132
GO_NUCLEAR_ENVELOPE	-0.485372	0.0541728	0.375558
GO_MACROPHAGE_ACTIVATION	-0.486676	0.0542522	0.376304
GO_EPITHELIAL_CELL_PROLIFERATION	-0.407465	0.0481622	0.376719
GO_NEGATIVE_REGULATION_OF_MITOTIC_CELL_CYCLE	-0.5067	0.0525547	0.378403
GO_RESPONSE_TO_LIPID	-0.342975	0.0223214	0.378913
GO_NEGATIVE_REGULATION_OF_TRANSCRIPTION_BY_RNA_POLYMERASE_II	-0.38326	0.0298137	0.379064
GO_CIRCULATORY_SYSTEM_DEVELOPMENT	-0.352572	0.0202703	0.379523
GO_RESPONSE_TO_MOLECULE_OF_BACTERIAL_ORIGIN	-0.385355	0.0254854	0.379585
GO_ENTRY_INTO_HOST	-0.452294	0.0491573	0.379857
GO_PROTEIN_COMPLEX_OLIGOMERIZATION	-0.435972	0.0390625	0.380622
GO_NEGATIVE_REGULATION_OF_NEURON_APOPTOTIC_PROCESS	-0.506277	0.0331492	0.380797
GO_REGENERATION	-0.454872	0.0383091	0.382787
GO_NEGATIVE_REGULATION_OF_NEURON_DEATH	-0.49109	0.0501393	0.382804
GO_BLOOD_VESSEL_MORPHOGENESIS	-0.367348	0.0367299	0.383418
GO_CARDIOVASCULAR_SYSTEM_DEVELOPMENT	-0.366841	0.0407186	0.383622
GO_REGULATION_OF_CHEMOTAXIS	-0.428552	0.0455729	0.383814
GO_RESPONSE_TO_CORTICOSTEROID	-0.50962	0.0437318	0.383853
GO_POSITIVE_REGULATION_OF_PHOSPHORUS_METABOLIC_PROCESS	-0.336724	0.0164474	0.384469
GO_RESPONSE_TO_INORGANIC_SUBSTANCE	-0.386806	0.0220859	0.386061
GO_REGULATION_OF_SYMBIOSIS_ENCOMPASSING_MUTUALISM_THROUGH_PARASITISM	-0.478671	0.051676	0.387211
GO_POSITIVE_REGULATION_OF_MYELOID_CELL_DIFFERENTIATION	-0.500042	0.0722222	0.388289
GO_CHROMATIN	-0.382584	0.0515337	0.391494
GO_CELLULAR_RESPONSE_TO_BIOTIC_STIMULUS	-0.385724	0.05875	0.392128
GO_POSITIVE_REGULATION_OF_PROTEIN_METABOLIC_PROCESS	-0.318274	0.0171306	0.397653
GO_INTERACTION_WITH_HOST	-0.424034	0.0630027	0.397977
GO_NEGATIVE_REGULATION_OF_CELL_POPULATION_PROLIFERATION	-0.358385	0.0517241	0.398598
GO_RESPONSE_TO_KETONE	-0.475301	0.0756063	0.399546
GO_TUBE_DEVELOPMENT	-0.337264	0.0332951	0.40024
GO_POSITIVE_REGULATION_OF_DEVELOPMENTAL_PROCESS	-0.31725	0.0195865	0.400752
GO_REGULATION_OF_MITOTIC_CELL_CYCLE	-0.41304	0.0784314	0.402528
GO_REGULATION_OF_CELL_SHAPE	-0.455702	0.059322	0.40385
GO_POSITIVE_REGULATION_OF_CELL_DIFFERENTIATION	-0.332168	0.0260181	0.404402
GO_CELLULAR_RESPONSE_TO_LIPID	-0.35679	0.0591716	0.405117
GO_CELLULAR_RESPONSE_TO_OXYGEN_CONTAINING_COMPOUND	-0.322483	0.0253863	0.406098
GO_IMPORT_INTO_CELL	-0.337807	0.0368664	0.406495
GO_EPITHELIAL_CELL_DIFFERENTIATION	-0.376536	0.052439	0.407866
GO_INNATE_IMMUNE_RESPONSE	-0.326153	0.0187431	0.407973
GO_DIVALENT_INORGANIC_CATION_TRANSPORT	-0.411414	0.0707965	0.408477
GO_NEGATIVE_REGULATION_OF_CELLULAR_CATABOLIC_PROCESS	-0.472558	0.0935252	0.409458
GO_NEGATIVE_REGULATION_OF_NUCLEOBASE_CONTAINING_COMPOUND_METABOLIC_PROCESS	-0.335447	0.0451389	0.41169
GO_CELLULAR_RESPONSE_TO_INORGANIC_SUBSTANCE	-0.449313	0.0548341	0.412867
GO_NUCLEAR_CHROMOSOME	-0.377457	0.0558313	0.415313
GO_POSITIVE_REGULATION_OF_HEMOPOIESIS	-0.415464	0.0675497	0.41922
GO_POSITIVE_REGULATION_OF_TRANSCRIPTION_BY_RNA_POLYMERASE_II	-0.344642	0.049238	0.425683
GO_RESPONSE_TO_ENDOPLASMIC_RETICULUM_STRESS	-0.402861	0.0699589	0.431142
GO_TAXIS	-0.332456	0.0446224	0.433156
GO_CHROMOSOME	-0.358013	0.0669145	0.434549
GO_INTERSPECIES_INTERACTION_BETWEEN_ORGANISMS	-0.316109	0.0393443	0.436019
GO_ANATOMICAL_STRUCTURE_FORMATION_INVOLVED_IN_MORPHOGENESIS	-0.319387	0.0555556	0.438207
GO_CHROMATIN_BINDING	-0.448047	0.0836763	0.444077
GO_CELLULAR_RESPONSE_TO_ORGANIC_CYCLIC_COMPOUND	-0.368155	0.071066	0.446964
GO_TUBE_MORPHOGENESIS	-0.33483	0.0398633	0.454557
GO_REGULATION_OF_LEUKOCYTE_DIFFERENTIATION	-0.378229	0.0942472	0.455448
GO_NEGATIVE_REGULATION_OF_RNA_BIOSYNTHETIC_PROCESS	-0.329859	0.0681551	0.462706
GO_CELLULAR_RESPONSE_TO_DRUG	-0.384305	0.092545	0.463399
GO_REGULATION_OF_PHOSPHORYLATION	-0.307346	0.0347072	0.464401
GO_MYELOID_CELL_HOMEOSTASIS	-0.452468	0.0911681	0.465008
GO_ORGANIC_HYDROXY_COMPOUND_METABOLIC_PROCESS	-0.422063	0.0951743	0.465139
GO_DNA_BINDING_TRANSCRIPTION_FACTOR_ACTIVITY_RNA_POLYMERASE_II_SPECIFIC	-0.351989	0.0721393	0.466226
GO_POSITIVE_REGULATION_OF_HYDROLASE_ACTIVITY	-0.329986	0.055814	0.466471
GO_POSITIVE_REGULATION_OF_PHAGOCYTOSIS	-0.460763	0.0994318	0.467419
GO_POSITIVE_REGULATION_OF_INTRACELLULAR_SIGNAL_TRANSDUCTION	-0.315009	0.0425764	0.468527
GO_POSITIVE_REGULATION_OF_LEUKOCYTE_DIFFERENTIATION	-0.417697	0.0990371	0.469713
GO_CIS_REGULATORY_REGION_BINDING	-0.388955	0.0947503	0.473444
GO_VESICLE_LUMEN	-0.355968	0.0992647	0.473746
GO_EPIDERMIS_DEVELOPMENT	-0.455961	0.120411	0.475074
GO_SIGNALING_RECEPTOR_BINDING	-0.29819	0.0491266	0.476165
GO_RESPONSE_TO_DRUG	-0.325703	0.0754936	0.477212
GO_POSITIVE_REGULATION_OF_CATALYTIC_ACTIVITY	-0.30124	0.0535519	0.478941
GO_NEGATIVE_REGULATION_OF_CELL_DEATH	-0.318029	0.0639731	0.481509
GO_CELL_SURFACE_RECEPTOR_SIGNALING_PATHWAY_INVOLVED_IN_CELL_CELL_SIGNALING	-0.3675	0.1	0.481556
GO_CELLULAR_RESPONSE_TO_EXTRACELLULAR_STIMULUS	-0.439155	0.113103	0.485495
GO_MYELOID_LEUKOCYTE_DIFFERENTIATION	-0.397586	0.103079	0.491508
GO_SEQUENCE_SPECIFIC_DOUBLE_STRANDED_DNA_BINDING	-0.353219	0.114458	0.492131
GO_T_CELL_DIFFERENTIATION	-0.396408	0.108815	0.497451
GO_RESPONSE_TO_NITROGEN_COMPOUND	-0.305938	0.0964813	0.499447
GO_FAT_CELL_DIFFERENTIATION	-0.43327	0.109397	0.506259
GO_RESPONSE_TO_STEROID_HORMONE	-0.380544	0.105063	0.507787
GO_REGULATION_OF_CELL_CYCLE_PROCESS	-0.385996	0.109459	0.510992
GO_COLLAGEN_CONTAINING_EXTRACELLULAR_MATRIX	-0.370058	0.103133	0.51327
GO_DNA_BINDING_TRANSCRIPTION_FACTOR_ACTIVITY	-0.337669	0.0932203	0.514458
GO_CELL_CELL_SIGNALING_BY_WNT	-0.370351	0.113281	0.514754
GO_SENSORY_SYSTEM_DEVELOPMENT	-0.443183	0.115774	0.516626
GO_REGULATION_OF_MYELOID_LEUKOCYTE_DIFFERENTIATION	-0.435458	0.116477	0.51814
GO_PROTEIN_HOMOOLIGOMERIZATION	-0.429659	0.109843	0.523691
GO_NEGATIVE_REGULATION_OF_IMMUNE_SYSTEM_PROCESS	-0.337431	0.113493	0.52424
GO_RESPONSE_TO_CARBOHYDRATE	-0.431226	0.145138	0.524816
GO_MOLECULAR_FUNCTION_REGULATOR	-0.286936	0.0504834	0.524886
GO_PROTEIN_KINASE_B_SIGNALING	-0.386665	0.137384	0.527094
GO_POSITIVE_REGULATION_OF_IMMUNE_SYSTEM_PROCESS	-0.29234	0.063388	0.527134
GO_POSITIVE_REGULATION_OF_LEUKOCYTE_MIGRATION	-0.393829	0.133775	0.527899
GO_POSITIVE_REGULATION_OF_PROTEIN_MODIFICATION_PROCESS	-0.299275	0.0753045	0.528277
GO_RESPONSE_TO_TEMPERATURE_STIMULUS	-0.417062	0.142857	0.534218
GO_CYCLIC_NUCLEOTIDE_MEDIATED_SIGNALING	-0.444161	0.156749	0.535015
GO_CELL_CELL_SIGNALING	-0.299654	0.0979955	0.537227
GO_REGULATION_OF_CELL_DEATH	-0.284583	0.0616216	0.5375
GO_MYELOID_CELL_DIFFERENTIATION	-0.341767	0.12638	0.538404
GO_PLATELET_ACTIVATION	-0.428885	0.135294	0.538769
GO_RNA_POLYMERASE_II_SPECIFIC_DNA_BINDING_TRANSCRIPTION_FACTOR_BINDING	-0.421602	0.15113	0.539801
GO_NEGATIVE_REGULATION_OF_HEMOPOIESIS	-0.420244	0.152327	0.540561
GO_RESPONSE_TO_RADIATION	-0.379116	0.163073	0.540578
GO_AGING	-0.378731	0.148704	0.541246
GO_COAGULATION	-0.37363	0.139623	0.541403
GO_NEGATIVE_REGULATION_OF_DEVELOPMENTAL_PROCESS	-0.299836	0.12	0.541895
GO_PEPTIDE_BINDING	-0.393639	0.157182	0.543387
GO_REGULATION_OF_CELL_DIFFERENTIATION	-0.279483	0.068929	0.543391
GO_TUMOR_NECROSIS_FACTOR_SUPERFAMILY_CYTOKINE_PRODUCTION	-0.365941	0.15756	0.54367
GO_REGULATION_OF_CELL_CYCLE_PHASE_TRANSITION	-0.426692	0.140056	0.54381
GO_LYMPHOCYTE_DIFFERENTIATION	-0.331678	0.139194	0.55114
GO_IMMUNE_SYSTEM_DEVELOPMENT	-0.288596	0.107623	0.552559
GO_MEMBRANE_REGION	-0.351454	0.147771	0.553645
GO_POSITIVE_REGULATION_OF_RNA_METABOLIC_PROCESS	-0.289569	0.105975	0.554698
GO_CELLULAR_RESPONSE_TO_TOXIC_SUBSTANCE	-0.368639	0.160162	0.554711
GO_POSITIVE_REGULATION_OF_INFLAMMATORY_RESPONSE	-0.40947	0.164706	0.555828
GO_REGULATION_OF_HYDROLASE_ACTIVITY	-0.288351	0.101562	0.555964
GO_SMALL_MOLECULE_BIOSYNTHETIC_PROCESS	-0.348041	0.156129	0.556995
GO_REGULATION_OF_IMMUNE_SYSTEM_PROCESS	-0.269247	0.0828092	0.559774
GO_REGULATION_OF_PHOSPHORUS_METABOLIC_PROCESS	-0.279977	0.0828848	0.560543
GO_POSITIVE_REGULATION_OF_LEUKOCYTE_CHEMOTAXIS	-0.415848	0.167382	0.560799
GO_POSITIVE_REGULATION_OF_CATABOLIC_PROCESS	-0.36295	0.172973	0.564725
GO_DOUBLE_STRANDED_DNA_BINDING	-0.326322	0.147023	0.565919
GO_REGULATION_OF_HEMOPOIESIS	-0.317607	0.151011	0.569747
GO_CELLULAR_RESPONSE_TO_REACTIVE_OXYGEN_SPECIES	-0.419197	0.189679	0.575314
GO_REGULATION_OF_MYELOID_CELL_DIFFERENTIATION	-0.365714	0.171206	0.579118
GO_RESPONSE_TO_TOXIC_SUBSTANCE	-0.302807	0.158924	0.579977
GO_ENDOPLASMIC_RETICULUM_LUMEN	-0.389198	0.182679	0.581531
GO_POSITIVE_REGULATION_OF_REACTIVE_OXYGEN_SPECIES_METABOLIC_PROCESS	-0.433711	0.185185	0.581868
GO_DEFENSE_RESPONSE_TO_BACTERIUM	-0.36819	0.182927	0.581923
GO_GROWTH_FACTOR_BINDING	-0.406029	0.188022	0.582928
GO_ERYTHROCYTE_HOMEOSTASIS	-0.435884	0.192582	0.583849
GO_CELLULAR_RESPONSE_TO_NITROGEN_COMPOUND	-0.31191	0.158788	0.585573
GO_RESPONSE_TO_VIRUS	-0.348763	0.179775	0.595531
GO_ENDOSOME_MEMBRANE	-0.307717	0.177986	0.599765
GO_ADAPTIVE_IMMUNE_RESPONSE_BASED_ON_SOMATIC_RECOMBINATION_OF_IMMUNE_RECEPTORS_BUILT_FROM_IMMUNOGLOBULIN_SUPERFAMILY_DOMAINS	-0.369364	0.174202	0.604716
GO_REGULATION_OF_PHAGOCYTOSIS	-0.377931	0.207084	0.61185
GO_REGULATION_OF_MULTI_ORGANISM_PROCESS	-0.283171	0.15656	0.61379
GO_STRIATED_MUSCLE_CELL_DIFFERENTIATION	-0.410631	0.184211	0.614582
GO_MUSCLE_CELL_DIFFERENTIATION	-0.384402	0.194444	0.6146
GO_RESPONSE_TO_OXYGEN_CONTAINING_COMPOUND	-0.26642	0.12433	0.615226
GO_REGULATION_OF_MRNA_METABOLIC_PROCESS	-0.401621	0.211348	0.615263
GO_EXOCYTOSIS	-0.272863	0.127292	0.616449
GO_CALCIUM_ION_BINDING	-0.317087	0.182728	0.617102
GO_SENSORY_PERCEPTION	-0.39424	0.186782	0.617321
GO_SEQUENCE_SPECIFIC_DNA_BINDING	-0.313688	0.181926	0.617635
GO_REGULATION_OF_MEMBRANE_POTENTIAL	-0.408244	0.210145	0.620293
GO_REGULATION_OF_INTRACELLULAR_SIGNAL_TRANSDUCTION	-0.261792	0.134844	0.620395
GO_DNA_BINDING_TRANSCRIPTION_FACTOR_BINDING	-0.361377	0.206897	0.621576
GO_REGULATION_OF_SMALL_MOLECULE_METABOLIC_PROCESS	-0.378136	0.228814	0.622243
GO_ENDOSOMAL_TRANSPORT	-0.378153	0.21978	0.622519
GO_REGULATION_OF_IMMUNE_EFFECTOR_PROCESS	-0.29964	0.215205	0.623326
GO_POSITIVE_REGULATION_OF_CELL_POPULATION_PROLIFERATION	-0.279443	0.167232	0.623364
GO_LIPID_BINDING	-0.303058	0.19686	0.629775
GO_RESPONSE_TO_LIGHT_STIMULUS	-0.400945	0.212205	0.630725
GO_POSITIVE_REGULATION_OF_CHEMOTAXIS	-0.385836	0.205801	0.633118
GO_MITOTIC_CELL_CYCLE	-0.309917	0.202788	0.633898
GO_CLATHRIN_COATED_VESICLE_MEMBRANE	-0.390211	0.228487	0.634554
GO_REGULATION_OF_PROTEIN_MODIFICATION_PROCESS	-0.260669	0.150538	0.636088
GO_ION_TRANSPORT	-0.274623	0.185841	0.63761
GO_REGULATION_OF_CELLULAR_AMIDE_METABOLIC_PROCESS	-0.387212	0.216033	0.637753
GO_PROTEIN_PHOSPHORYLATION	-0.257214	0.141649	0.638552
GO_CANONICAL_WNT_SIGNALING_PATHWAY	-0.375129	0.233286	0.642569
GO_G_PROTEIN_COUPLED_RECEPTOR_SIGNALING_PATHWAY_COUPLED_TO_CYCLIC_NUCLEOTIDE_SECOND_MESSENGER	-0.388315	0.237482	0.643485
GO_REGULATION_OF_CELL_CYCLE	-0.294204	0.206731	0.647796
GO_RESPONSE_TO_WOUNDING	-0.283535	0.184149	0.647932
GO_CELL_MOTILITY	-0.256324	0.15493	0.649855
GO_POSITIVE_REGULATION_OF_NUCLEOBASE_CONTAINING_COMPOUND_METABOLIC_PROCESS	-0.269477	0.183896	0.653439
GO_MITOCHONDRION_ORGANIZATION	-0.388325	0.245113	0.654671
GO_CELLULAR_RESPONSE_TO_PEPTIDE	-0.314583	0.224384	0.654922
GO_CELLULAR_RESPONSE_TO_ENDOGENOUS_STIMULUS	-0.263006	0.185393	0.655105
GO_POSITIVE_REGULATION_OF_MOLECULAR_FUNCTION	-0.254163	0.175027	0.655747
GO_EPITHELIUM_DEVELOPMENT	-0.280011	0.194318	0.655827
GO_NEGATIVE_REGULATION_OF_PEPTIDASE_ACTIVITY	-0.362346	0.241107	0.656605
GO_HEART_DEVELOPMENT	-0.323465	0.225389	0.657016
GO_INTRINSIC_APOPTOTIC_SIGNALING_PATHWAY	-0.35532	0.224324	0.65746
GO_RESPONSE_TO_PEPTIDE	-0.298036	0.24938	0.658221
GO_EXTRACELLULAR_MATRIX	-0.319836	0.240523	0.659591
GO_EXTERNAL_SIDE_OF_PLASMA_MEMBRANE	-0.33815	0.249007	0.660519
GO_CELLULAR_HOMEOSTASIS	-0.270901	0.229358	0.660767
GO_PRODUCTION_OF_MOLECULAR_MEDIATOR_OF_IMMUNE_RESPONSE	-0.357624	0.258235	0.660835
GO_INTERLEUKIN_1_PRODUCTION	-0.371451	0.236915	0.661023
GO_RESPONSE_TO_MECHANICAL_STIMULUS	-0.372023	0.254958	0.661222
GO_PURINE_CONTAINING_COMPOUND_METABOLIC_PROCESS	-0.370723	0.239038	0.662062
GO_REGULATION_OF_EXOCYTOSIS	-0.362831	0.236986	0.66208
GO_ENZYME_ACTIVATOR_ACTIVITY	-0.300823	0.242197	0.662559
GO_RESPONSE_TO_ENDOGENOUS_STIMULUS	-0.255049	0.186885	0.662642
GO_CELL	-0.270694	0.227064	0.663173
GO_PEPTIDASE_REGULATOR_ACTIVITY	-0.395548	0.256854	0.663714
GO_ENZYME_LINKED_RECEPTOR_PROTEIN_SIGNALING_PATHWAY	-0.274132	0.214857	0.663756
GO_POSITIVE_REGULATION_OF_TUMOR_NECROSIS_FACTOR_SUPERFAMILY_CYTOKINE_PRODUCTION	-0.384958	0.25641	0.663784
GO_DRUG_METABOLIC_PROCESS	-0.303229	0.245963	0.663972
GO_POSITIVE_REGULATION_OF_CELL_DEATH	-0.27749	0.22314	0.664071
GO_DIVALENT_INORGANIC_CATION_HOMEOSTASIS	-0.304973	0.254902	0.665283
GO_CELL_CYCLE_PHASE_TRANSITION	-0.354225	0.255435	0.665341
GO_CELL_KILLING	-0.369231	0.261939	0.665564
GO_REGULATION_OF_INFLAMMATORY_RESPONSE	-0.306986	0.237437	0.667059
GO_MUSCLE_CELL_PROLIFERATION	-0.367763	0.293617	0.682462
GO_COATED_VESICLE_MEMBRANE	-0.369363	0.268126	0.682975
GO_PROTEIN_KINASE_ACTIVITY	-0.315913	0.271298	0.685205
GO_CELLULAR_RESPONSE_TO_EXTERNAL_STIMULUS	-0.350755	0.285714	0.686195
GO_CELLULAR_ION_HOMEOSTASIS	-0.282638	0.253521	0.686743
GO_CELLULAR_RESPONSE_TO_OXYGEN_LEVELS	-0.369336	0.288858	0.687255
GO_NEGATIVE_REGULATION_OF_CATABOLIC_PROCESS	-0.361214	0.289548	0.688472
GO_REGULATION_OF_TRANSPORTER_ACTIVITY	-0.352796	0.28022	0.689999
GO_T_CELL_ACTIVATION	-0.284856	0.269412	0.691759
GO_RESPONSE_TO_ABIOTIC_STIMULUS	-0.258045	0.253025	0.692225
GO_PROTEIN_LOCALIZATION_TO_PLASMA_MEMBRANE	-0.343645	0.277852	0.69247
GO_REGULATION_OF_REGULATED_SECRETORY_PATHWAY	-0.376279	0.291304	0.693123
GO_TRANSMEMBRANE_RECEPTOR_PROTEIN_TYROSINE_KINASE_SIGNALING_PATHWAY	-0.280294	0.265625	0.693897
GO_ADAPTIVE_IMMUNE_RESPONSE	-0.304757	0.280457	0.694291
GO_NEGATIVE_REGULATION_OF_CELL_MOTILITY	-0.353906	0.26338	0.694648
GO_AXON_DEVELOPMENT	-0.298607	0.285539	0.694674
GO_METAL_ION_HOMEOSTASIS	-0.280071	0.284514	0.694965
GO_REGULATION_OF_CATABOLIC_PROCESS	-0.275922	0.256471	0.695651
GO_TRANSCRIPTION_REGULATOR_ACTIVITY	-0.269729	0.25315	0.696457
GO_GROWTH	-0.273229	0.258824	0.696613
GO_POSITIVE_REGULATION_OF_CELLULAR_CATABOLIC_PROCESS	-0.324079	0.300945	0.69704
GO_DEVELOPMENTAL_GROWTH	-0.284598	0.258809	0.697102
GO_POSITIVE_REGULATION_OF_CELLULAR_BIOSYNTHETIC_PROCESS	-0.24925	0.262987	0.698484
GO_GOLGI_VESICLE_TRANSPORT	-0.34078	0.313352	0.700601
GO_NEGATIVE_REGULATION_OF_MOLECULAR_FUNCTION	-0.258303	0.268374	0.700813
GO_METAL_ION_TRANSPORT	-0.28201	0.263538	0.702039
GO_REGULATION_OF_WNT_SIGNALING_PATHWAY	-0.338808	0.287278	0.702287
GO_LOCOMOTION	-0.2369	0.258824	0.716392
GO_ALPHA_BETA_T_CELL_ACTIVATION	-0.367036	0.305707	0.718096
GO_REGULATION_OF_EPITHELIAL_CELL_MIGRATION	-0.322146	0.305249	0.723882
GO_REGULATION_OF_BODY_FLUID_LEVELS	-0.292398	0.30303	0.724576
GO_REGULATION_OF_RESPONSE_TO_EXTERNAL_STIMULUS	-0.242686	0.282751	0.73699
GO_ION_HOMEOSTASIS	-0.263028	0.296167	0.737429
GO_TEMPERATURE_HOMEOSTASIS	-0.341897	0.319209	0.737961
GO_POSITIVE_REGULATION_OF_EPITHELIAL_CELL_PROLIFERATION	-0.330556	0.330544	0.748885
GO_POSITIVE_REGULATION_OF_EPITHELIAL_CELL_MIGRATION	-0.364783	0.331453	0.75348
GO_CYTOKINE_METABOLIC_PROCESS	-0.339387	0.33557	0.758355
GO_POSITIVE_REGULATION_OF_LOCOMOTION	-0.264162	0.310304	0.759095
GO_REGULATION_OF_CELLULAR_RESPONSE_TO_STRESS	-0.276346	0.323961	0.76232
GO_NEGATIVE_REGULATION_OF_ORGANELLE_ORGANIZATION	-0.315863	0.335907	0.763209
GO_NEGATIVE_REGULATION_OF_CELL_CYCLE	-0.29637	0.334197	0.763581
GO_KINASE_ACTIVITY	-0.285682	0.328662	0.764537
GO_ADAPTIVE_THERMOGENESIS	-0.358853	0.34887	0.76486
GO_POSITIVE_REGULATION_OF_PROTEIN_CONTAINING_COMPLEX_ASSEMBLY	-0.337771	0.362731	0.765686
GO_REGULATION_OF_VESICLE_MEDIATED_TRANSPORT	-0.261942	0.326139	0.767014
GO_POSTTRANSCRIPTIONAL_REGULATION_OF_GENE_EXPRESSION	-0.302934	0.373711	0.779679
GO_NEGATIVE_REGULATION_OF_RESPONSE_TO_EXTERNAL_STIMULUS	-0.275089	0.351553	0.779876
GO_DEFENSE_RESPONSE_TO_VIRUS	-0.318511	0.365621	0.78018
GO_REGULATION_OF_AUTOPHAGY	-0.335747	0.355396	0.780803
GO_PROTEIN_LOCALIZATION_TO_CELL_PERIPHERY	-0.314109	0.342033	0.781387
GO_NEGATIVE_REGULATION_OF_CATALYTIC_ACTIVITY	-0.254948	0.348033	0.781968
GO_NUCLEOBASE_CONTAINING_SMALL_MOLECULE_METABOLIC_PROCESS	-0.328213	0.373093	0.782459
GO_UBIQUITIN_LIKE_PROTEIN_LIGASE_BINDING	-0.305304	0.358108	0.782979
GO_CLATHRIN_COATED_VESICLE	-0.326794	0.382184	0.78551
GO_NEGATIVE_REGULATION_OF_CYTOKINE_PRODUCTION	-0.309753	0.375494	0.78754
GO_EXTRINSIC_APOPTOTIC_SIGNALING_PATHWAY	-0.33497	0.369408	0.78798
GO_ENDOPLASMIC_RETICULUM	-0.240765	0.372615	0.789603
GO_ENZYME_REGULATOR_ACTIVITY	-0.245622	0.356823	0.790165
GO_SECOND_MESSENGER_MEDIATED_SIGNALING	-0.289895	0.408545	0.791847
GO_MEMBRANE_ORGANIZATION	-0.245289	0.354167	0.79215
GO_REGULATORY_REGION_NUCLEIC_ACID_BINDING	-0.260889	0.400713	0.79295
GO_REGULATION_OF_LYMPHOCYTE_ACTIVATION	-0.25498	0.392298	0.793039
GO_ZINC_ION_BINDING	-0.297921	0.409962	0.793139
GO_POSITIVE_REGULATION_OF_RESPONSE_TO_EXTERNAL_STIMULUS	-0.244897	0.401902	0.793367
GO_IN_UTERO_EMBRYONIC_DEVELOPMENT	-0.308336	0.376011	0.793395
GO_ANTIGEN_PROCESSING_AND_PRESENTATION	-0.292901	0.396705	0.794093
GO_REGULATION_OF_ENDOTHELIAL_CELL_MIGRATION	-0.344067	0.408223	0.79424
GO_REGULATION_OF_LYMPHOCYTE_DIFFERENTIATION	-0.316967	0.410082	0.794318
GO_REGULATION_OF_GROWTH	-0.256594	0.424821	0.794748
GO_POSITIVE_REGULATION_OF_VASCULATURE_DEVELOPMENT	-0.309074	0.41931	0.795712
GO_WOUND_HEALING	-0.256278	0.404151	0.795808
GO_REGULATION_OF_INTRACELLULAR_TRANSPORT	-0.314375	0.427586	0.795979
GO_NEGATIVE_REGULATION_OF_INFLAMMATORY_RESPONSE	-0.326638	0.405256	0.796034
GO_B_CELL_DIFFERENTIATION	-0.31626	0.400273	0.79611
GO_AMEBOIDAL_TYPE_CELL_MIGRATION	-0.27212	0.417193	0.796606
GO_RESPONSE_TO_GROWTH_FACTOR	-0.246638	0.394484	0.796737
GO_TRANSCRIPTION_FACTOR_COMPLEX	-0.314226	0.417568	0.796789
GO_NEGATIVE_REGULATION_OF_IMMUNE_EFFECTOR_PROCESS	-0.321273	0.401138	0.79703
GO_TRANSFERASE_ACTIVITY_TRANSFERRING_PHOSPHORUS_CONTAINING_GROUPS	-0.268834	0.416244	0.7971
GO_POST_TRANSLATIONAL_PROTEIN_MODIFICATION	-0.310982	0.401099	0.797221
GO_ANTIGEN_PROCESSING_AND_PRESENTATION_OF_PEPTIDE_ANTIGEN	-0.303137	0.40646	0.797582
GO_COATED_VESICLE	-0.30101	0.421543	0.797967
GO_LEUKOCYTE_CELL_CELL_ADHESION	-0.263555	0.42439	0.798274
GO_REGULATION_OF_PEPTIDASE_ACTIVITY	-0.277199	0.363049	0.798613
GO_REGULATION_OF_CELL_MORPHOGENESIS	-0.271793	0.392727	0.7996
GO_CELL_ACTIVATION	-0.210392	0.4341	0.801018
GO_ENZYME_INHIBITOR_ACTIVITY	-0.287782	0.40875	0.801713
GO_CELL_CYCLE_PROCESS	-0.246497	0.438424	0.802121
GO_REGULATION_OF_BINDING	-0.282239	0.394256	0.802209
GO_ALCOHOL_METABOLIC_PROCESS	-0.338249	0.375546	0.802699
GO_REGULATION_OF_T_CELL_ACTIVATION	-0.275237	0.390335	0.803011
GO_KINASE_BINDING	-0.26042	0.384707	0.803769
GO_RECEPTOR_SIGNALING_PATHWAY_VIA_STAT	-0.321066	0.387006	0.805146
GO_SECRETION	-0.208667	0.424084	0.805177
GO_SMALL_MOLECULE_METABOLIC_PROCESS	-0.238471	0.377803	0.805189
GO_REGULATION_OF_CELLULAR_COMPONENT_MOVEMENT	-0.235845	0.365385	0.806497
GO_PROCESS_UTILIZING_AUTOPHAGIC_MECHANISM	-0.296282	0.387648	0.807054
GO_HYDROLASE_ACTIVITY_ACTING_ON_ESTER_BONDS	-0.286589	0.394839	0.807373
GO_REGULATION_OF_CELLULAR_CATABOLIC_PROCESS	-0.258558	0.382318	0.807406
GO_IMMUNE_RESPONSE_REGULATING_CELL_SURFACE_RECEPTOR_SIGNALING_PATHWAY	-0.27852	0.394805	0.808236
GO_SENSORY_ORGAN_DEVELOPMENT	-0.297957	0.418056	0.80863
GO_REGULATION_OF_CELL_ACTIVATION	-0.250784	0.376593	0.809613
GO_MUSCLE_STRUCTURE_DEVELOPMENT	-0.263711	0.385086	0.80964
GO_REGULATION_OF_LEUKOCYTE_PROLIFERATION	-0.297019	0.386126	0.809709
GO_POSITIVE_REGULATION_OF_PEPTIDYL_TYROSINE_PHOSPHORYLATION	-0.334145	0.372765	0.809879
GO_RESPONSE_TO_HORMONE	-0.243732	0.368966	0.810424
GO_NEGATIVE_REGULATION_OF_LOCOMOTION	-0.286685	0.440587	0.812876
GO_ANION_TRANSPORT	-0.287502	0.43254	0.815433
GO_NEGATIVE_REGULATION_OF_MULTICELLULAR_ORGANISMAL_PROCESS	-0.222685	0.417595	0.816715
GO_LYMPHOCYTE_ACTIVATION	-0.231834	0.463048	0.823662
GO_APOPTOTIC_SIGNALING_PATHWAY	-0.248828	0.430521	0.823951
GO_CELLULAR_RESPONSE_TO_STEROID_HORMONE_STIMULUS	-0.324582	0.444915	0.824086
GO_GENERATION_OF_PRECURSOR_METABOLITES_AND_ENERGY	-0.318992	0.446479	0.824487
GO_REGULATION_OF_ADAPTIVE_IMMUNE_RESPONSE	-0.325132	0.450785	0.824752
GO_HEAD_DEVELOPMENT	-0.255408	0.450495	0.82489
GO_ORGANIC_ACID_BIOSYNTHETIC_PROCESS	-0.317793	0.439944	0.82549
GO_CYTOSKELETON_ORGANIZATION	-0.223198	0.451357	0.825991
GO_ION_TRANSMEMBRANE_TRANSPORT	-0.241066	0.467153	0.826691
GO_STRESS_ACTIVATED_PROTEIN_KINASE_SIGNALING_CASCADE	-0.292138	0.458503	0.826784
GO_CELL_CYCLE	-0.22936	0.447458	0.827445
GO_POSITIVE_REGULATION_OF_BINDING	-0.315016	0.43101	0.827621
GO_NEGATIVE_REGULATION_OF_CELL_DIFFERENTIATION	-0.24022	0.466112	0.828242
GO_WHOLE_MEMBRANE	-0.210419	0.449198	0.82848
GO_PHOSPHORIC_ESTER_HYDROLASE_ACTIVITY	-0.313411	0.463203	0.828544
GO_CELLULAR_RESPONSE_TO_ABIOTIC_STIMULUS	-0.315476	0.448373	0.828727
GO_NEGATIVE_REGULATION_OF_RESPONSE_TO_STIMULUS	-0.210045	0.467672	0.829158
GO_PHOSPHOLIPID_BINDING	-0.277753	0.454662	0.831103
GO_POSITIVE_REGULATION_OF_IMMUNE_EFFECTOR_PROCESS	-0.284923	0.459387	0.832178
GO_NEGATIVE_REGULATION_OF_DEFENSE_RESPONSE	-0.283298	0.473177	0.832521
GO_RESPONSE_TO_EXTRACELLULAR_STIMULUS	-0.253991	0.508599	0.833992
GO_MONOCARBOXYLIC_ACID_METABOLIC_PROCESS	-0.283256	0.472329	0.835492
GO_REGULATION_OF_DEFENSE_RESPONSE	-0.227202	0.480226	0.835506
GO_SECRETORY_GRANULE	-0.21371	0.479826	0.835589
GO_CONNECTIVE_TISSUE_DEVELOPMENT	-0.30901	0.463989	0.837196
GO_EMBRYO_DEVELOPMENT_ENDING_IN_BIRTH_OR_EGG_HATCHING	-0.253783	0.485934	0.838047
GO_REGULATION_OF_PEPTIDYL_TYROSINE_PHOSPHORYLATION	-0.290415	0.489189	0.838657
GO_VACUOLAR_MEMBRANE	-0.243608	0.478313	0.839824
GO_ENVELOPE	-0.246434	0.481258	0.841625
GO_NEURON_PROJECTION_GUIDANCE	-0.30166	0.501405	0.842108
GO_CELL_CELL_ADHESION	-0.220144	0.512027	0.842495
GO_TISSUE_MIGRATION	-0.27339	0.491413	0.843057
GO_HOMEOSTATIC_PROCESS	-0.206179	0.505308	0.843694
GO_PROTEIN_HOMODIMERIZATION_ACTIVITY	-0.243775	0.500597	0.843829
GO_CYTOKINE_PRODUCTION	-0.212087	0.492786	0.844136
GO_CARBOHYDRATE_DERIVATIVE_BIOSYNTHETIC_PROCESS	-0.265912	0.489717	0.845131
GO_CATION_TRANSPORT	-0.226611	0.515607	0.846472
GO_NEGATIVE_REGULATION_OF_GROWTH	-0.288432	0.487535	0.84765
GO_CENTRAL_NERVOUS_SYSTEM_DEVELOPMENT	-0.229504	0.517857	0.847709
GO_DEVELOPMENTAL_MATURATION	-0.308822	0.511177	0.848438
GO_NEGATIVE_REGULATION_OF_PROTEOLYSIS	-0.266788	0.49004	0.848834
GO_CELLULAR_COMPONENT_MORPHOGENESIS	-0.219654	0.542012	0.849137
GO_ORGANIC_ACID_METABOLIC_PROCESS	-0.234134	0.496962	0.849138
GO_DEVELOPMENTAL_CELL_GROWTH	-0.295838	0.507422	0.849492
GO_ORGANOPHOSPHATE_METABOLIC_PROCESS	-0.248554	0.496815	0.850496
GO_STEM_CELL_DIFFERENTIATION	-0.299573	0.511955	0.853493
GO_REGULATION_OF_CELL_CELL_ADHESION	-0.235815	0.525998	0.853658
GO_TUMOR_NECROSIS_FACTOR_MEDIATED_SIGNALING_PATHWAY	-0.311225	0.502152	0.853954
GO_LEUKOCYTE_PROLIFERATION	-0.256021	0.526048	0.854503
GO_NERVOUS_SYSTEM_PROCESS	-0.240187	0.528465	0.854607
GO_SECRETORY_VESICLE	-0.202575	0.517876	0.854744
GO_SPECIFIC_GRANULE	-0.26609	0.518614	0.854814
GO_CHEMICAL_HOMEOSTASIS	-0.214151	0.532955	0.856165
GO_CELLULAR_NITROGEN_COMPOUND_CATABOLIC_PROCESS	-0.245266	0.505141	0.856338
GO_RESPONSE_TO_PEPTIDE_HORMONE	-0.268536	0.54026	0.856434
GO_REGULATION_OF_IMMUNE_RESPONSE	-0.206905	0.540393	0.856463
GO_POSITIVE_REGULATION_OF_SIGNALING	-0.197157	0.56017	0.859796
GO_REGULATION_OF_PROTEIN_POLYMERIZATION	-0.276292	0.497931	0.859899
GO_CADHERIN_BINDING	-0.24791	0.527814	0.870225
GO_MESENCHYME_DEVELOPMENT	-0.264925	0.547145	0.870379
GO_PROTEIN_CONTAINING_COMPLEX_ASSEMBLY	-0.204641	0.53733	0.870498
GO_REGULATION_OF_RESPONSE_TO_STRESS	-0.198246	0.57377	0.870815
GO_RIBOSE_PHOSPHATE_METABOLIC_PROCESS	-0.304508	0.538571	0.872516
GO_REGULATION_OF_CELLULAR_LOCALIZATION	-0.22585	0.553571	0.874137
GO_NEGATIVE_REGULATION_OF_PROTEIN_METABOLIC_PROCESS	-0.209587	0.594866	0.874558
GO_NEGATIVE_REGULATION_OF_SIGNALING	-0.203426	0.58114	0.878676
GO_MOLECULAR_ADAPTOR_ACTIVITY	-0.302482	0.542657	0.880013
GO_REGULATION_OF_ANIMAL_ORGAN_MORPHOGENESIS	-0.282409	0.56038	0.880459
GO_POSITIVE_REGULATION_OF_MULTICELLULAR_ORGANISMAL_PROCESS	-0.191745	0.603613	0.88574
GO_SUPRAMOLECULAR_COMPLEX	-0.221245	0.568603	0.886414
GO_MUSCLE_TISSUE_DEVELOPMENT	-0.270789	0.534694	0.887268
GO_HOMEOSTASIS_OF_NUMBER_OF_CELLS	-0.256599	0.586526	0.890794
GO_POSITIVE_REGULATION_OF_CELLULAR_COMPONENT_ORGANIZATION	-0.206857	0.609428	0.890916
GO_TERTIARY_GRANULE	-0.244951	0.568153	0.891604
GO_NEGATIVE_REGULATION_OF_LEUKOCYTE_CELL_CELL_ADHESION	-0.291826	0.5671	0.892291
GO_ACTIVATION_OF_IMMUNE_RESPONSE	-0.216262	0.576784	0.89248
GO_IMMUNE_EFFECTOR_PROCESS	-0.188221	0.627263	0.892488
GO_IDENTICAL_PROTEIN_BINDING	-0.197496	0.608454	0.892918
GO_MYELOID_LEUKOCYTE_ACTIVATION	-0.195707	0.636564	0.895953
GO_MACROAUTOPHAGY	-0.289177	0.585366	0.896343
GO_CHEMOKINE_PRODUCTION	-0.300669	0.54612	0.896455
GO_INTRACELLULAR_RECEPTOR_SIGNALING_PATHWAY	-0.272662	0.586301	0.90228
GO_LIPID_METABOLIC_PROCESS	-0.207807	0.612198	0.903851
GO_REGULATION_OF_NEURON_DIFFERENTIATION	-0.217896	0.639852	0.905408
GO_CELL_SURFACE	-0.204928	0.6097	0.905795
GO_POSITIVE_REGULATION_OF_CELLULAR_COMPONENT_BIOGENESIS	-0.232758	0.580231	0.905853
GO_TRANSMEMBRANE_TRANSPORT	-0.204341	0.61017	0.905946
GO_REGULATION_OF_DEVELOPMENTAL_GROWTH	-0.239438	0.587302	0.906241
GO_ORGANIC_HYDROXY_COMPOUND_TRANSPORT	-0.295758	0.559322	0.906668
GO_ORGANIC_ANION_TRANSPORT	-0.256552	0.58871	0.90685
GO_REGULATION_OF_CALCIUM_ION_TRANSPORT	-0.283638	0.587904	0.906926
GO_PROTEIN_STABILIZATION	-0.277453	0.571233	0.907342
GO_INTERLEUKIN_6_PRODUCTION	-0.260321	0.602054	0.907558
GO_RESPONSE_TO_XENOBIOTIC_STIMULUS	-0.300906	0.577912	0.907729
GO_POSITIVE_REGULATION_OF_IMMUNE_RESPONSE	-0.199095	0.625874	0.907963
GO_REGULATION_OF_OSSIFICATION	-0.260465	0.591549	0.908408
GO_NEGATIVE_REGULATION_OF_IMMUNE_RESPONSE	-0.266579	0.596994	0.90897
GO_CELL_LEADING_EDGE	-0.223878	0.606135	0.909293
GO_BIOLOGICAL_ADHESION	-0.184531	0.666667	0.909374
GO_REGULATION_OF_REACTIVE_OXYGEN_SPECIES_METABOLIC_PROCESS	-0.267203	0.590973	0.911161
GO_REGULATION_OF_TRANSMEMBRANE_TRANSPORT	-0.228588	0.6067	0.911954
GO_RECEPTOR_METABOLIC_PROCESS	-0.248834	0.607337	0.913932
GO_REGULATION_OF_CELLULAR_PROTEIN_LOCALIZATION	-0.224901	0.652065	0.91458
GO_CALCIUM_ION_TRANSMEMBRANE_TRANSPORT	-0.26675	0.61958	0.914605
GO_TRANSCRIPTION_FACTOR_BINDING	-0.213736	0.643216	0.914778
GO_REGULATION_OF_LEUKOCYTE_MEDIATED_IMMUNITY	-0.241498	0.62586	0.915043
GO_RESPONSE_TO_OXYGEN_LEVELS	-0.235939	0.628272	0.915265
GO_RESPONSE_TO_ALCOHOL	-0.237001	0.646214	0.915281
GO_CELLULAR_RESPONSE_TO_HORMONE_STIMULUS	-0.210839	0.655637	0.915308
GO_OSTEOBLAST_DIFFERENTIATION	-0.272488	0.631081	0.915363
GO_MORPHOGENESIS_OF_AN_EPITHELIUM	-0.228682	0.632124	0.915391
GO_POSITIVE_REGULATION_OF_SUPRAMOLECULAR_FIBER_ORGANIZATION	-0.24771	0.612817	0.915721
GO_MESENCHYMAL_CELL_DIFFERENTIATION	-0.243602	0.613889	0.915752
GO_LYMPHOCYTE_MEDIATED_IMMUNITY	-0.24727	0.644156	0.916206
GO_POSITIVE_REGULATION_OF_CELL_ADHESION	-0.214938	0.670303	0.916263
GO_REGULATION_OF_MUSCLE_SYSTEM_PROCESS	-0.260531	0.641749	0.917079
GO_NUCLEAR_TRANSPORT	-0.285619	0.609329	0.917265
GO_IMMUNE_RESPONSE_REGULATING_SIGNALING_PATHWAY	-0.20464	0.655991	0.917444
GO_COFACTOR_BINDING	-0.284063	0.60745	0.918345
GO_KINASE_REGULATOR_ACTIVITY	-0.265607	0.607789	0.91835
GO_GLYCOPROTEIN_BIOSYNTHETIC_PROCESS	-0.277828	0.626277	0.919189
GO_REGULATION_OF_CELL_ADHESION	-0.202563	0.635955	0.919666
GO_ORGANIC_CYCLIC_COMPOUND_CATABOLIC_PROCESS	-0.21301	0.644721	0.919734
GO_SMALL_GTPASE_BINDING	-0.235382	0.660105	0.920011
GO_MUSCLE_ADAPTATION	-0.276968	0.653793	0.920043
GO_REGULATION_OF_RESPONSE_TO_CYTOKINE_STIMULUS	-0.251531	0.650281	0.920327
GO_TRANSMEMBRANE_RECEPTOR_PROTEIN_SERINE_THREONINE_KINASE_SIGNALING_PATHWAY	-0.234056	0.65625	0.920443
GO_COGNITION	-0.262266	0.640056	0.92075
GO_CELL_CYCLE_ARREST	-0.282465	0.639944	0.920752
GO_G_PROTEIN_COUPLED_RECEPTOR_ACTIVITY	-0.26264	0.641921	0.921815
GO_PERINUCLEAR_REGION_OF_CYTOPLASM	-0.204769	0.665463	0.921842
GO_RESPONSE_TO_INSULIN	-0.260028	0.643251	0.921844
GO_AMINOGLYCAN_METABOLIC_PROCESS	-0.287275	0.628205	0.922052
GO_REGULATION_OF_KINASE_ACTIVITY	-0.200582	0.675294	0.9222
GO_ENDOCYTIC_VESICLE_MEMBRANE	-0.233827	0.622593	0.922671
GO_NEGATIVE_REGULATION_OF_HYDROLASE_ACTIVITY	-0.223909	0.680739	0.922943
GO_REGULATION_OF_PROTEOLYSIS	-0.196506	0.705471	0.923678
GO_CELL_CELL_ADHESION_VIA_PLASMA_MEMBRANE_ADHESION_MOLECULES	-0.270883	0.626647	0.923716
GO_NEURON_DIFFERENTIATION	-0.190126	0.726316	0.925085
GO_NEURON_DEVELOPMENT	-0.194238	0.713124	0.925354
GO_CELLULAR_DETOXIFICATION	-0.266728	0.644345	0.925479
GO_POSITIVE_REGULATION_OF_LEUKOCYTE_CELL_CELL_ADHESION	-0.231224	0.670116	0.926031
GO_PROTEASOMAL_PROTEIN_CATABOLIC_PROCESS	-0.231094	0.695122	0.927628
GO_MICROTUBULE_CYTOSKELETON_ORGANIZATION	-0.246944	0.686981	0.927682
GO_HEART_MORPHOGENESIS	-0.247875	0.667129	0.927762
GO_REGULATION_OF_DNA_BINDING_TRANSCRIPTION_FACTOR_ACTIVITY	-0.212346	0.671216	0.928019
GO_RESPONSE_TO_NUTRIENT	-0.239273	0.669344	0.928091
GO_SMALL_GTPASE_MEDIATED_SIGNAL_TRANSDUCTION	-0.190918	0.741177	0.928955
GO_GLIAL_CELL_DEVELOPMENT	-0.259672	0.676162	0.929144
GO_CELL_ACTIVATION_INVOLVED_IN_IMMUNE_RESPONSE	-0.17181	0.776923	0.929263
GO_POSITIVE_REGULATION_OF_PROTEIN_CATABOLIC_PROCESS	-0.267455	0.668588	0.929349
GO_TERTIARY_GRANULE_MEMBRANE	-0.257769	0.709724	0.929445
GO_POSITIVE_REGULATION_OF_TRANSPORT	-0.181121	0.755682	0.929522
GO_REGULATION_OF_BLOOD_PRESSURE	-0.263931	0.692427	0.929806
GO_POSITIVE_REGULATION_OF_DEFENSE_RESPONSE	-0.189167	0.742389	0.929816
GO_CELL_PART_MORPHOGENESIS	-0.19569	0.73957	0.93007
GO_REGULATION_OF_CELL_SUBSTRATE_ADHESION	-0.2437	0.713137	0.930087
GO_ANIMAL_ORGAN_MORPHOGENESIS	-0.189669	0.751185	0.930136
GO_SIDE_OF_MEMBRANE	-0.206018	0.700855	0.930464
GO_SYNAPSE_ORGANIZATION	-0.238334	0.687324	0.930533
GO_POSITIVE_REGULATION_OF_CYTOSKELETON_ORGANIZATION	-0.231695	0.713333	0.930581
GO_REGULATION_OF_ORGANELLE_ORGANIZATION	-0.176163	0.777143	0.930682
GO_PEPTIDYL_TYROSINE_MODIFICATION	-0.224376	0.703022	0.930811
GO_REGULATION_OF_ANATOMICAL_STRUCTURE_SIZE	-0.19987	0.758228	0.930934
GO_REGULATION_OF_TRANSPORT	-0.171917	0.766447	0.931053
GO_OXIDOREDUCTASE_ACTIVITY	-0.207432	0.734668	0.931058
GO_REGULATION_OF_TRANSFERASE_ACTIVITY	-0.184865	0.761143	0.931069
GO_REGULATION_OF_SYSTEM_PROCESS	-0.208096	0.726811	0.931071
GO_CELL_GROWTH	-0.212959	0.692209	0.931135
GO_TRANSPORTER_ACTIVITY	-0.208862	0.70581	0.931189
GO_CELLULAR_RESPONSE_TO_DNA_DAMAGE_STIMULUS	-0.208928	0.744872	0.931226
GO_REGULATION_OF_STRESS_ACTIVATED_PROTEIN_KINASE_SIGNALING_CASCADE	-0.261805	0.677326	0.93179
GO_REGULATION_OF_CATION_TRANSMEMBRANE_TRANSPORT	-0.218885	0.697248	0.93181
GO_REGULATION_OF_ION_TRANSMEMBRANE_TRANSPORT	-0.22452	0.716495	0.931816
GO_LYMPHOCYTE_ACTIVATION_INVOLVED_IN_IMMUNE_RESPONSE	-0.242866	0.708219	0.931845
GO_SUPRAMOLECULAR_FIBER_ORGANIZATION	-0.1895	0.749705	0.931917
GO_CELL_PROJECTION_ORGANIZATION	-0.179377	0.737723	0.932021
GO_COFACTOR_METABOLIC_PROCESS	-0.222971	0.726913	0.932364
GO_DETOXIFICATION	-0.252648	0.708638	0.932832
GO_REGULATION_OF_NEURON_PROJECTION_DEVELOPMENT	-0.205257	0.699379	0.932923
GO_POSITIVE_REGULATION_OF_CELL_ACTIVATION	-0.209366	0.726474	0.933308
GO_DEVELOPMENTAL_GROWTH_INVOLVED_IN_MORPHOGENESIS	-0.260714	0.678112	0.93336
GO_POSITIVE_REGULATION_OF_KINASE_ACTIVITY	-0.20306	0.73852	0.933907
GO_PROTEIN_POLYMERIZATION	-0.238465	0.688525	0.93426
GO_NEUROGENESIS	-0.173784	0.785078	0.934556
GO_MRNA_PROCESSING	-0.24438	0.719884	0.935632
GO_ENDOTHELIAL_CELL_MIGRATION	-0.235851	0.732877	0.942409
GO_PHAGOCYTOSIS	-0.188353	0.757463	0.943641
GO_REGULATION_OF_PROTEIN_CONTAINING_COMPLEX_ASSEMBLY	-0.209635	0.754183	0.94388
GO_POSITIVE_REGULATION_OF_NEURON_DIFFERENTIATION	-0.217323	0.755348	0.945229
GO_PROTEIN_HETERODIMERIZATION_ACTIVITY	-0.209681	0.753947	0.949385
GO_REGULATION_OF_CYTOSKELETON_ORGANIZATION	-0.187066	0.778739	0.949422
GO_GLAND_DEVELOPMENT	-0.20655	0.765013	0.949822
GO_CELLULAR_LIPID_METABOLIC_PROCESS	-0.187321	0.777078	0.950128
GO_ION_TRANSMEMBRANE_TRANSPORTER_ACTIVITY	-0.210538	0.785619	0.952305
GO_REGULATION_OF_SMALL_GTPASE_MEDIATED_SIGNAL_TRANSDUCTION	-0.198072	0.774684	0.955124
GO_CARBOHYDRATE_METABOLIC_PROCESS	-0.205519	0.769536	0.955223
GO_SUPRAMOLECULAR_POLYMER	-0.194326	0.78481	0.955668
GO_POSITIVE_REGULATION_OF_TRANSFERASE_ACTIVITY	-0.185479	0.806733	0.961306
GO_DNA_METABOLIC_PROCESS	-0.195068	0.836436	0.962002
GO_ORGANONITROGEN_COMPOUND_BIOSYNTHETIC_PROCESS	-0.157478	0.841304	0.962088
GO_ENDOSOME	-0.165391	0.835017	0.962469
GO_REGULATION_OF_RESPONSE_TO_WOUNDING	-0.221678	0.804138	0.96272
GO_T_CELL_PROLIFERATION	-0.215577	0.782432	0.963189
GO_PROTEIN_DIMERIZATION_ACTIVITY	-0.168643	0.815636	0.963317
GO_ENDOCYTIC_VESICLE	-0.17966	0.812808	0.96333
GO_POSITIVE_REGULATION_OF_CYTOKINE_PRODUCTION	-0.176131	0.811834	0.964009
GO_AXON	-0.188952	0.840789	0.964103
GO_SPECIFIC_GRANULE_MEMBRANE	-0.212072	0.801145	0.964118
GO_NEGATIVE_REGULATION_OF_NEURON_DIFFERENTIATION	-0.218301	0.76356	0.96418
GO_RAS_PROTEIN_SIGNAL_TRANSDUCTION	-0.185064	0.801993	0.964269
GO_RUFFLE	-0.229276	0.788965	0.964471
GO_POSITIVE_REGULATION_OF_CELL_CELL_ADHESION	-0.186577	0.831633	0.964568
GO_MUSCLE_SYSTEM_PROCESS	-0.180414	0.835234	0.965036
GO_SOMATODENDRITIC_COMPARTMENT	-0.182882	0.813517	0.965048
GO_CELLULAR_PROTEIN_CONTAINING_COMPLEX_ASSEMBLY	-0.168188	0.851319	0.965177
GO_NEGATIVE_REGULATION_OF_TRANSPORT	-0.173979	0.837065	0.965532
GO_RNA_PROCESSING	-0.189261	0.820611	0.965733
GO_SYNAPTIC_MEMBRANE	-0.230074	0.815549	0.965849
GO_REGULATION_OF_CELL_DEVELOPMENT	-0.16096	0.866434	0.966176
GO_NEGATIVE_REGULATION_OF_PHOSPHORYLATION	-0.181739	0.83313	0.966725
GO_FC_RECEPTOR_SIGNALING_PATHWAY	-0.221974	0.794076	0.967125
GO_REGULATION_OF_SUPRAMOLECULAR_FIBER_ORGANIZATION	-0.189393	0.80104	0.967169
GO_CELLULAR_PROTEIN_CATABOLIC_PROCESS	-0.173432	0.848301	0.967407
GO_ORGANONITROGEN_COMPOUND_CATABOLIC_PROCESS	-0.161638	0.848485	0.96743
GO_MUSCLE_ORGAN_DEVELOPMENT	-0.198075	0.811421	0.967689
GO_APICAL_PART_OF_CELL	-0.201918	0.811141	0.967711
GO_ACTIN_FILAMENT_POLYMERIZATION	-0.216303	0.802452	0.968168
GO_TRANS_GOLGI_NETWORK	-0.216269	0.810888	0.968397
GO_MICROTUBULE_BASED_PROCESS	-0.198087	0.816561	0.968676
GO_DENDRITIC_TREE	-0.190989	0.796855	0.968677
GO_GTPASE_BINDING	-0.190096	0.800766	0.968967
GO_NEGATIVE_REGULATION_OF_CYTOSKELETON_ORGANIZATION	-0.220874	0.82963	0.968982
GO_POSITIVE_REGULATION_OF_NEURON_PROJECTION_DEVELOPMENT	-0.199522	0.813793	0.969239
GO_REGULATION_OF_INTRINSIC_APOPTOTIC_SIGNALING_PATHWAY	-0.228133	0.830242	0.969247
GO_NEGATIVE_REGULATION_OF_CELL_DEVELOPMENT	-0.18941	0.834656	0.969449
GO_REGULATION_OF_ENDOCYTOSIS	-0.212214	0.801113	0.969587
GO_NEGATIVE_REGULATION_OF_SECRETION	-0.210448	0.78854	0.969616
GO_PROTEIN_DEPHOSPHORYLATION	-0.212098	0.842475	0.969908
GO_TRANSPORT_VESICLE	-0.220422	0.797203	0.970469
GO_REGULATION_OF_ACTIN_FILAMENT_ORGANIZATION	-0.180951	0.842037	0.970616
GO_REGULATION_OF_CELL_PROJECTION_ORGANIZATION	-0.17415	0.830751	0.971493
GO_ANTIGEN_RECEPTOR_MEDIATED_SIGNALING_PATHWAY	-0.211198	0.827834	0.9721
GO_CATION_TRANSMEMBRANE_TRANSPORT	-0.163499	0.883519	0.973437
GO_POSITIVE_REGULATION_OF_ORGANELLE_ORGANIZATION	-0.165795	0.883085	0.9736
GO_FOREBRAIN_DEVELOPMENT	-0.208635	0.852224	0.974701
GO_REGULATION_OF_PROTEIN_STABILITY	-0.183746	0.860186	0.97517
GO_VESICLE_ORGANIZATION	-0.178545	0.872679	0.975409
GO_VESICLE_MEMBRANE	-0.139219	0.928731	0.975447
GO_CELL_PROJECTION_MEMBRANE	-0.205187	0.850291	0.975968
GO_NEURON_PROJECTION	-0.155397	0.907534	0.975975
GO_CELL_BODY	-0.172129	0.861147	0.975996
GO_ATPASE_ACTIVITY	-0.216529	0.855895	0.976068
GO_REGULATION_OF_PROTEIN_CATABOLIC_PROCESS	-0.19118	0.863014	0.976436
GO_INTRINSIC_COMPONENT_OF_ORGANELLE_MEMBRANE	-0.196466	0.86541	0.976808
GO_EMBRYO_DEVELOPMENT	-0.153183	0.921801	0.976938
GO_RNA_BINDING	-0.145967	0.900222	0.977043
GO_GLUTAMATERGIC_SYNAPSE	-0.192401	0.883469	0.977413
GO_ACTIN_POLYMERIZATION_OR_DEPOLYMERIZATION	-0.187671	0.870654	0.977881
GO_ORGANIC_ACID_TRANSPORT	-0.203968	0.850725	0.97835
GO_CELLULAR_RESPONSE_TO_INSULIN_STIMULUS	-0.216415	0.85277	0.979293
GO_REGULATION_OF_RAS_PROTEIN_SIGNAL_TRANSDUCTION	-0.18582	0.882834	0.985675
GO_PRESYNAPSE	-0.172728	0.894452	0.987054
GO_NEGATIVE_REGULATION_OF_PROTEIN_MODIFICATION_PROCESS	-0.136748	0.941677	0.987235
GO_POSITIVE_REGULATION_OF_MULTI_ORGANISM_PROCESS	-0.145196	0.919471	0.987377
GO_UROGENITAL_SYSTEM_DEVELOPMENT	-0.168108	0.908973	0.987392
GO_NUCLEAR_SPECK	-0.195692	0.871688	0.987993
GO_NEGATIVE_REGULATION_OF_NEURON_PROJECTION_DEVELOPMENT	-0.19152	0.893275	0.988218
GO_CALCIUM_MEDIATED_SIGNALING	-0.178353	0.924581	0.988247
GO_REGULATION_OF_CYSTEINE_TYPE_ENDOPEPTIDASE_ACTIVITY	-0.180662	0.882597	0.988248
GO_ACTIN_FILAMENT_ORGANIZATION	-0.158235	0.919054	0.988333
GO_REGULATION_OF_RESPONSE_TO_BIOTIC_STIMULUS	-0.147381	0.918536	0.988408
GO_CELL_MORPHOGENESIS_INVOLVED_IN_NEURON_DIFFERENTIATION	-0.145769	0.941846	0.988457
GO_ORGANELLE_SUBCOMPARTMENT	-0.152894	0.937748	0.988481
GO_POLYMERIC_CYTOSKELETAL_FIBER	-0.158927	0.924403	0.988513
GO_NEGATIVE_REGULATION_OF_CELL_PROJECTION_ORGANIZATION	-0.19152	0.897902	0.988567
GO_REGULATION_OF_ACTIN_FILAMENT_BASED_PROCESS	-0.142588	0.955527	0.988933
GO_REGULATION_OF_METAL_ION_TRANSPORT	-0.174521	0.902655	0.989342
GO_CELL_MORPHOGENESIS_INVOLVED_IN_DIFFERENTIATION	-0.141058	0.953405	0.989765
GO_TRANSCRIPTION_COREGULATOR_ACTIVITY	-0.162756	0.936	0.989863
GO_OXIDATION_REDUCTION_PROCESS	-0.147936	0.945844	0.989921
GO_CELLULAR_RESPONSE_TO_PEPTIDE_HORMONE_STIMULUS	-0.162239	0.930423	0.98994
GO_NEGATIVE_REGULATION_OF_INTRACELLULAR_SIGNAL_TRANSDUCTION	-0.152948	0.937581	0.99002
GO_GLIAL_CELL_DIFFERENTIATION	-0.172757	0.932394	0.990069
GO_CATION_TRANSMEMBRANE_TRANSPORTER_ACTIVITY	-0.164324	0.944444	0.990313
GO_PATTERN_SPECIFICATION_PROCESS	-0.183818	0.913342	0.991338
GO_GUANYL_NUCLEOTIDE_BINDING	-0.150883	0.957529	0.991516
GO_EARLY_ENDOSOME	-0.162536	0.915829	0.991901
GO_CELL_PROJECTION_ASSEMBLY	-0.130058	0.986877	0.992185
GO_ACTIVATION_OF_INNATE_IMMUNE_RESPONSE	-0.142445	0.963245	0.992377
GO_REGULATION_OF_CELL_MORPHOGENESIS_INVOLVED_IN_DIFFERENTIATION	-0.170084	0.894737	0.992621
GO_CELL_CELL_JUNCTION	-0.14314	0.945501	0.992668
GO_CELL_ADHESION_MOLECULE_BINDING	-0.144455	0.927059	0.99272
GO_ORGAN_GROWTH	-0.19194	0.924264	0.992762
GO_APICAL_PLASMA_MEMBRANE	-0.167739	0.951429	0.992812
GO_CELLULAR_MACROMOLECULE_LOCALIZATION	-0.113145	0.990333	0.993223
GO_INTRACELLULAR_TRANSPORT	-0.111049	0.989396	0.993339
GO_GOLGI_MEMBRANE	-0.142825	0.933333	0.993463
GO_CENTROSOME	-0.141281	0.981638	0.993561
GO_POSITIVE_REGULATION_OF_PEPTIDASE_ACTIVITY	-0.167942	0.95389	0.993698
GO_ESTABLISHMENT_OR_MAINTENANCE_OF_CELL_POLARITY	-0.148948	0.976056	0.993829
GO_PATTERN_RECOGNITION_RECEPTOR_SIGNALING_PATHWAY	-0.130767	0.977513	0.993978
GO_POSITIVE_REGULATION_OF_CELL_PROJECTION_ORGANIZATION	-0.125847	0.981308	0.994339
GO_REGULATION_OF_CELLULAR_PROTEIN_CATABOLIC_PROCESS	-0.186131	0.910765	0.994379
GO_MICROTUBULE_CYTOSKELETON	-0.134113	0.973203	0.994608
GO_CYTOSKELETAL_PROTEIN_BINDING	-0.142337	0.934307	0.994637
GO_ENDOMEMBRANE_SYSTEM_ORGANIZATION	-0.12061	0.993404	0.994651
GO_GUANYL_NUCLEOTIDE_EXCHANGE_FACTOR_ACTIVITY	-0.182155	0.912732	0.994909
GO_PLASMA_MEMBRANE_REGION	-0.102804	0.990588	0.99494
GO_NEGATIVE_REGULATION_OF_TRANSFERASE_ACTIVITY	-0.137638	0.982019	0.995187
GO_POSITIVE_REGULATION_OF_PROTEOLYSIS	-0.129001	0.971429	0.995448
GO_ORGANELLE_LOCALIZATION	-0.108613	0.997326	0.995598
GO_UBIQUITIN_LIKE_PROTEIN_TRANSFERASE_ACTIVITY	-0.1218	0.991342	0.995921
GO_MUSCLE_CONTRACTION	-0.145886	0.976584	0.995972
GO_POSITIVE_REGULATION_OF_CELL_DEVELOPMENT	-0.126443	0.973881	0.996407
GO_DISTAL_AXON	-0.153044	0.982222	0.996709
GO_REGULATION_OF_CELLULAR_COMPONENT_SIZE	-0.130503	0.96799	0.997063
GO_NUCLEOLUS	-0.0996327	0.988957	0.997342
GO_NUCLEAR_BODY	-0.135811	0.981183	0.998044
GO_NUCLEAR_OUTER_MEMBRANE_ENDOPLASMIC_RETICULUM_MEMBRANE_NETWORK	-0.112192	0.983568	0.998123
GO_REGULATION_OF_CELLULAR_COMPONENT_BIOGENESIS	-0.117663	0.982057	0.998163
GO_MODIFICATION_DEPENDENT_MACROMOLECULE_CATABOLIC_PROCESS	-0.13213	0.976593	0.998791
